# Supplementary material for: Use of age-specific hospital catchment populations to investigate geographical variation in inpatient admissions for children and young people in England: retrospective, cross-sectional study
Source: PubMed Central journal article supplement — BMJ Open. 2018 Jul 10;8(7):e022339. doi: 10.1136/bmjopen-2018-022339 (PMC6082474; doi:10.1136/bmjopen-2018-022339), 2018-07-10
Supplement: bmjopen-2018-022339.draft_revisions.pdf [file bmjopen-2018-022339.draft_revisions.pdf]

# BMJ Open

BMJ Open is committed to open peer review. As part of this commitment we make the peer review history of every article we publish publicly available.

When an article is published we post the peer reviewers' comments and the authors' responses online. We also post the versions of the paper that were used during peer review. These are the versions that the peer review comments apply to.

The versions of the paper that follow are the versions that were submitted during the peer review process. They are not the versions of record or the final published versions. They should not be cited or distributed as the published version of this manuscript.

BMJ Open is an open access journal and the full, final, typeset and author-corrected version of record of the manuscript is available on our site with no access controls, subscription charges or pay-per-view fees (<http://bmjopen.bmj.com>).

If you have any questions on BMJ Open's open peer review process please email [info.bmjopen@bmj.com](mailto:info.bmjopen@bmj.com)

# BMJ Open

## Use of age-specific hospital catchment populations to investigate geographical variation in inpatient admissions for children and young people in England: retrospective, cross-sectional study.

|                               |                                                                                                                                                                                                                                                                                                                                                                                    |
|-------------------------------|------------------------------------------------------------------------------------------------------------------------------------------------------------------------------------------------------------------------------------------------------------------------------------------------------------------------------------------------------------------------------------|
| Journal:                      | <i>BMJ Open</i>                                                                                                                                                                                                                                                                                                                                                                    |
| Manuscript ID                 | bmjopen-2018-022339                                                                                                                                                                                                                                                                                                                                                                |
| Article Type:                 | Research                                                                                                                                                                                                                                                                                                                                                                           |
| Date Submitted by the Author: | 12-Feb-2018                                                                                                                                                                                                                                                                                                                                                                        |
| Complete List of Authors:     | Arora, Sandeepa; Nuffield Trust; Imperial College London School of Public Health<br>Cheung, R; Department of Paediatrics, St Thomas' Hospital; Public Health England Child and Maternal Health Intelligence Network<br>Sherlaw-Johnson, Christopher; Nuffield Trust<br>Hargreaves, Dougal; University College London, Population, Policy & Practice Programme; The Nuffield Trust, |
| Keywords:                     | Variation, PAEDIATRICS, Children and young people, Health services research, Hospital catchment population                                                                                                                                                                                                                                                                         |
|                               |                                                                                                                                                                                                                                                                                                                                                                                    |

SCHOLARONE™  
Manuscripts

1  
2  
3 **Use of age-specific hospital catchment populations to investigate geographical variation in**  
4 **inpatient admissions for children and young people in England: retrospective, cross-**  
5 **sectional study.**  
6  
7  
8

9  
10 Sandeepa Arora<sup>1,2</sup> (s.arora@imperial.ac.uk)

11  
12 C. Ronny Cheung<sup>3,4</sup>, (crcheung@gmail.com)

13  
14 Chris Sherlaw-Johnson<sup>1</sup> (christopher.sherlaw-johnson@nuffieldtrust.org.uk)

15  
16 Dougal S. Hargreaves<sup>1,5\*</sup> ([d.hargreaves@ucl.ac.uk](mailto:d.hargreaves@ucl.ac.uk))  
17  
18  
19

20  
21 <sup>1</sup>The Nuffield Trust

22  
23 <sup>2</sup>Imperial College London.

24  
25 <sup>3</sup>Evelina London Children's Hospital

26  
27 <sup>4</sup>Public Health England Child and Maternal Health Intelligence Network

28  
29 <sup>5</sup>UCL Great Ormond Street Institute of Child Health  
30  
31

32  
33 **\*Corresponding author.**

34  
35 Dr Dougal S. Hargreaves.

36  
37 Population, Policy and Practice Programme,

38  
39 UCL Great Ormond Street Institute of Child Health

40  
41 30 Guilford Street

42  
43 London

44  
45 WC1N 1EH

46  
47 d.hargreaves@ucl.ac.uk  
48  
49

50  
51 **Word count: 3031**  
52  
53  
54  
55  
56  
57  
58  
59  
60

1  
2  
3 **Key words:**

4 Variation

5  
6 Paediatrics

7  
8 Children and young people

9  
10 Health services research

11  
12 Hospital catchment population

13  
14  
15  
16  
17  
18  
19  
20  
21  
22  
23  
24  
25  
26  
27  
28  
29  
30  
31  
32  
33  
34  
35  
36  
37  
38  
39  
40  
41  
42  
43  
44  
45  
46  
47  
48  
49  
50  
51  
52  
53  
54  
55  
56  
57  
58  
59  
60

For peer review only

## ABSTRACT

### Objectives

- To develop a method for calculating age-specific hospital catchment populations for children and young people (CYP) in England.
- To show how these methods allow geographical variation in hospital activity to be investigated and addressed more effectively.

### Design

Retrospective, secondary analysis of existing national datasets.

### Setting

Inpatient care of children and young people (0-18 years) in England

### Participants

Hospital Episode Statistics (HES) data were accessed for all inpatient admissions (elective and emergency) for CYP from birth to 18 years, 364 days, for 2011/12 – 2014/15. In 2014/15, 857112 admissions were analysed, from an eligible population of approximately 11.9 million CYP.

### Outcome measures

For each hospital Trust, the catchment population of CYP was calculated; Trust-level admission rates per thousand per year were then calculated for admissions due to

- Any diagnostic code
- Primary diagnosis of epilepsy
- Epilepsy listed as primary diagnosis or comorbidity

### Results

1  
2  
3 Estimated 2014/15 hospital catchment populations for CYP ranged from 268,558 for Barts Health  
4 NHS Trust to around 30,000 for the smallest acute general paediatric services and below 10,000 for  
5 many Trusts providing specialist services. As expected, the composition of HCPs was fairly consistent  
6 for age breakdown but levels of deprivation varied widely.  
7  
8  
9

10  
11 After standardising for population characteristics, admission rates with a primary diagnosis of  
12 epilepsy ranged from 14.3 to 157.7 per 100,000 per year (11.0-fold variation) for Trusts providing  
13 acute general paediatric services. All-cause admission rates showed less variation, ranging from 4033  
14 to 11681 per 100,000 per year (2.9-fold variation).  
15  
16  
17  
18  
19

## 20 21 **Conclusions**

22  
23 Use of age-specific catchment populations allows variation in hospital activity to be linked to specific  
24 teams and care pathways. This provides an evidence base for initiatives to tackle unwarranted  
25 variation in healthcare activity and health outcomes.  
26  
27  
28  
29  
30  
31  
32  
33  
34  
35  
36  
37  
38  
39  
40  
41  
42  
43  
44  
45  
46  
47  
48  
49  
50  
51  
52  
53  
54  
55  
56  
57  
58  
59  
60

## Article Summary

### Strengths and limitations of this study

- We adapt methodology for estimating hospital catchment populations, which has been validated and used extensively by Public Health England for adult and all-age populations.
- A strength of this study is the use of Hospital Episode Statistics, which contain high-quality data on the vast majority of hospital care for children and young people in England.
- Another strength is the ability to standardise for population differences, including age, sex and deprivation, so that fair comparisons can be made between services.
- Although there were very low levels of missing postcode overall (1.2%), a small number of Trusts reported missing postcode data on over 5% of patients, meaning that the catchment populations for these Trusts should be interpreted with caution.

## Background

In 2012, the Chief Medical Officer expressed concern about the poor health outcomes experienced by children and young people (CYP) in England compared to other West European countries. She argued that one key route to improving these outcomes would be through understanding and addressing the wide geographical variation in health services and outcomes within England.<sup>(1)</sup> More recent evidence shows that this variation persists – for example, the rates of hospital admission for elective tonsillectomy in CYP by Clinical Commissioning Groups ranged from 84 to 485 per 100,000 population (5.7-fold variation) while asthma admission rates varied from 60 to 639 per 100,000 population (10.6-fold variation).<sup>(2)</sup> However, with some exceptions, greater awareness has not resulted in effective action to tackle geographical variation, and there has been limited research to understand the causes of variation.

One important limitation of previous work has been that geographical analysis of healthcare activity has been restricted to Clinical Commissioning Groups (CCGs) or Local Authority areas (LAs). These geographical areas are defined by their responsibility for commissioning services within their designated population, whereas provision of most health services is by individual NHS Trust. Each area is often served by many different NHS Trusts, preventing variation being attributed to specific hospital services. A second important limitation has often been the inability of policy makers and researchers to adjust for population risk (i.e. to understand the proportion of variation that can be accounted for by population differences).

In the US, hospital service areas allow analysis of health outcomes in the population served by specific hospital or networks.<sup>(3)</sup> In the UK, a number of different methods have been used to calculate hospital catchment populations (HCPs) for adults, <sup>(15)</sup> of which the most widely used is the proportionate flow method used by Public Health England (PHE).<sup>(4, 5, 18)</sup> However, the marked differences in referral pathways, clinical networks and hospital activity between paediatric and adult services limits the application of published catchment populations to study variation in CYP.



1  
2  
3 This article describes how we adapted the use of PHE methods to calculate age-specific hospital  
4 catchment populations for paediatric services, both unadjusted and adjusted for population  
5 characteristics (sex, age, deprivation). These represent estimates of the number of CYP who would  
6 have been admitted to each Trust had they needed hospital care, disaggregated by age, sex and  
7 deprivation. We analyse data on epilepsy admissions as a practical example to illustrate how these  
8 methods may be useful to guide commissioning, operational and policy decisions. Potential  
9 application of these methods to other conditions is also discussed.  
10  
11  
12  
13  
14  
15  
16  
17  
18  
19  
20

## 21 **Methods**

### 22 *Data*

23  
24  
25  
26  
27 Hospital Episode Statistics (HES) data(6) were accessed for all inpatient admissions (elective and  
28 emergency) for children and young people from birth to 18 years, 364 days, for 2011/12 – 2014/15.

29  
30  
31 For each admission, we analysed:

- 32  
33  
34 • geographic data on the admitting NHS Trust and the Lower Layer Super Output Area  
35 (LSOA),(7) which is derived from the patient's postcode;
- 36  
37 • sociodemographic data on sex, age;
- 38  
39 • ICD10 codes of the primary diagnosis and any secondary diagnoses. For the second set of  
40  
41  
42 analyses, we focused on admissions for epilepsy (ICD10 codes G40, G41)  
43  
44

45  
46 HES data were then linked to Office of National Statistics (ONS) data on Index of Multiple  
47 Deprivation (IMD) and the CYP population within each LSOA,(8) disaggregated by age and sex (based  
48 on ONS 2012 mid-year estimates by age, sex).  
49

50  
51  
52 Note that the term 'hospital catchment population' (HCP) refers to the catchment population of an  
53 NHS Trust – an administrative unit that may include more than one hospital site. We retained the  
54  
55  
56  
57

1  
2  
3 term hospital catchment population as the term NHS Trust is not widely understood, especially by  
4  
5 readers who are not familiar with the English NHS.  
6  
7  
8  
9

### 10 *Derivation of hospital catchment populations*

11  
12  
13 Derivation involved 5 steps – described below.  
14

15  
16 1. HES data were used to count the number of patients in each age and sex group admitted from  
17  
18 each LSOA to

- 19 a) any provider (NHS Trust) and
- 20 b) each individual provider.

21  
22  
23  
24  
25  
26  
27 HESIDs (unique patient identifiers within the HES data) were used to ensure that each patient was  
28  
29 only counted once; if a patient had multiple admissions while living at the same address, we selected  
30  
31 only the first admission.  
32

33  
34  
35 2. Within each age and sex group, we calculated the proportion of patients from each Lower Layer  
36  
37 Super Output Area (LSOA) that was admitted by each provider, as a proportion of patients who used  
38  
39 any provider.  
40  
41

42  
43  
44 For band  $i$  (age and sex), LSOA  $\lambda$ , the number admitted to provider  $a$  is denoted by  $x_{ia\lambda}$ . The total  
45  
46 number admitted by LSOA and band  $i$  for each year is denoted by  $\sum_b x_{ib\lambda}$  then,  
47

$$48 \quad p_{ia\lambda} = \frac{x_{ia\lambda}}{\sum_b x_{ib\lambda}}$$

49  
50  
51 Where  $p_{ia\lambda}$  represents the proportion of patients that went to each provider.  
52  
53  
54  
55  
56  
57  
58  
59  
60

3. For each LSOA, this proportion was multiplied by the LSOA resident population in that age-sex group  $N_{i\lambda}$  to give the LSOA catchment population for each provider  $n_{ia\lambda}$ .

The catchment population of provider  $a$  for band  $i$  (age and sex) is then:

$$n_{ia\lambda} = p_{ia\lambda} N_{i\lambda}$$

4. The provider-specific catchment populations for each LSOA were summed to give the total catchment population for that provider.

Thus, the total catchment population  $C$  for provider  $a$ , band  $i$  (age and sex):

$$C_{ia} = \sum_{\lambda} n_{ia\lambda}$$

5. Adding in information on IMD decile, the total catchment population for provider  $a$ , band  $i$  (age and sex), IMD  $D$  is:

$$C_{iaD} = \sum_{\lambda} n_{ia\lambda} \delta_{Dd(\lambda)}$$

Where

$$\delta_{Dd(\lambda)} = \begin{cases} 1 & \text{if } d(\lambda) = D \\ 0 & \text{otherwise} \end{cases}$$

Notes:

We excluded patients with missing or invalid age at start of episodes (<0.1%) or with no valid English LSOA (1.2% of episodes; median proportion of episodes at Trust level = 0.6%). Nine Trusts (6.2%) had missing LSOA data on >5% of episodes (range 5.1% to 26.1%), reflecting either a high proportion of patients who live in Wales or incomplete coding. These Trusts are identified in Table 1 & 2 and their estimated HCPs should be interpreted with caution. See Appendix Table A5 for further details.

Some patients moved residence during the analysis period and had admissions to the same Trust from different postcodes of residence. We counted these patients once in each LSOA. Significant

1  
2  
3 numbers of patients are treated in a region other than their region of residence and catchment areas  
4  
5 of Trusts therefore cross regional boundaries.  
6  
7  
8  
9

10 *Use of hospital catchment populations to investigate variation in epilepsy admission rates for CYP.*  
11

12  
13 In order to illustrate the use of hospital catchment populations, we calculated unadjusted and  
14  
15 adjusted admission rates for all-cause and epilepsy admissions per thousand CYP. The median,  
16  
17 interquartile range, range and ratio of highest: lowest Trust-level admission rates were calculated.  
18  
19 Following previous studies(2), we then re-calculated the range and ratio of highest:lowest admission  
20  
21 rates excluding the 5 highest and 5 lowest Trusts. This is a form of sensitivity analyses that is  
22  
23 recommended in order to minimise distortion from a small number of outliers in the reliability of  
24  
25 diagnostic coding.  
26  
27

28  
29 Next, the ratio of observed versus expected admissions were calculated for each Trust. To do this,  
30  
31 the expected admission rates for each Trust (unadjusted) were calculated by multiplying the national  
32  
33 epilepsy admission rate per thousand CYP by the total catchment population for that Trust. The  
34  
35 adjusted values for expected admission rates used a similar approach, based on the national  
36  
37 epilepsy admission rate per thousand and the Trust catchment population within each age-sex-IMD  
38  
39 group. The expected total number of admissions for each Trust was the sum of expected admissions  
40  
41 within each age-sex-IMD group.  
42  
43

44  
45 In each case, we then derived the ratio of observed versus expected epilepsy admissions,  
46  
47 highlighting those Trusts with admission rates that differed by more than 2 or 3 standard deviations  
48  
49 from the expected rate for the population served.  
50

51  
52 All analyses were performed using SAS. No ethical approval was needed for these secondary  
53  
54 analyses of anonymised, routinely-collected data.  
55  
56  
57

### *Patient involvement*

Concerns about geographical variation in the quality, accessibility and capacity of NHS services for children and young people have been raised repeatedly in consultations in CYP and families.(1) No patients or families were directly involved in designing or performing these analyses.

### **Results**

In 2014/15, 857,112 admissions were analysed, from an eligible population of approximately 11.9 million CYP. The Trust serving the largest number of CYP was Barts Health NHS Trust, with an estimated paediatric Hospital Catchment Population (HCP) of 268,558, compared to the national median HCP of 71,379. Sixteen Trusts had estimated catchment populations of <10,000. This may reflect the fact that they provide specialist services (e.g. Great Ormond Street Hospital, Papworth Hospital NHS Foundation Trust); or that only specific groups of CYP are admitted (for example, inpatient care for new born babies, or young people (usually aged 16 or over) who were admitted under the care of adult specialists (e.g. Birmingham Women's NHS Foundation Trust, Liverpool Women's Hospital NHS Trust). The smallest catchment populations for Trusts providing acute general paediatric services were around thirty thousand (e.g. Northern Devon Healthcare NHS Trust = 34,821 Sheffield Teaching Hospitals NHS Foundation Trust = 27,899).

Table 1 presents the standardised HCPs for each NHS Trust in London where CYP were admitted. These data illustrate the impact of reconfiguration and mergers of Trusts during the period 2011/12 to 2014/15 on the HCP for each Trust. For example, London North West Healthcare NHS Trust was newly formed in 2014, and took on the workload of North West London Hospitals NHS Trust. Similarly, Barnet and Chase Farm Hospitals NHS Trust merged with the Royal Free Hospital in 2014, with the result that much of Barnet's HCP was transferred across to the HCP of Royal Free Hospital. Standardised HCPs for all NHS Trusts in England are shown in Appendix Table A1.

1  
2  
3 Appendix Table A2 presents the HCPs for each Trust in England where CYP were admitted in  
4 2014/15, disaggregated by IMD quintile. In four cases, greater than 60% of the CYP population  
5 served by a Trust lived in the most deprived quintile of areas (Homerton University Hospital NHS  
6 Foundation Trust (77.4%); Sandwell and West Birmingham Hospitals NHS Trust (65.0%), Royal  
7 Liverpool Broadgreen Hospitals NHS Trust (62.7%), Barts Health NHS Trust (60.4%)). In contrast, two  
8 Trusts served a population where more than 60% lived in the least deprived quintile: Frimley Park  
9 Hospital NHS Trust (61.1%), Royal Surrey County NHS Foundation Trust (60.3%).

10  
11  
12  
13  
14  
15  
16  
17  
18 The age breakdown varied much less between Trusts. The proportion of all 0-18s who were in the 0-  
19 3 age band varied from 27.9% in Chelsea & Westminster Hospital NHS Foundation Trust, to 19.2% at  
20 the Robert Jones and Agnes Hunt Orthopaedic Trust. See Appendix Table A3.

21  
22  
23  
24  
25 Excluding Trusts that do not provide acute general paediatrics services (see explanation above),  
26 standardised admission rates with a primary diagnosis of epilepsy ranged from 14.3 to 157.7 per  
27 100,000 per year (11.0-fold variation). The median value was 71.3 per 100 000, with an interquartile  
28 range from 55.8 to 90.3. Excluding the five Trusts with the highest and lowest admission rates, the  
29 range reduced to 30.9 to 124.9 vs. 30.9 per 100,000 per year (4.0-fold variation). All-cause admission  
30 rates showed much less variation, with all-cause admissions in Trusts providing acute paediatric  
31 services ranging from 4033 to 11681 per 100,000 per year (2.9-fold variation), with a median of  
32 7,130 and an interquartile range from to 5,890 to 8,390 per 10,000 per year. Excluding the highest  
33 and lowest five, the range was from 4439 to 10,200 to 4439 per 10,000 per year (2.3-fold variation).

34  
35  
36  
37  
38  
39  
40  
41  
42  
43  
44  
45 In Figure 1 (top panel), unadjusted epilepsy admission rates are presented for each Trust in a funnel  
46 plot, illustrating that relatively little of the observed variation can be explained by random chance  
47 among relatively small units. The lower panel presents both unadjusted and adjusted epilepsy  
48 admission rates for each Trust, showing that only a small degree of the observed variation can be  
49 explained by differences in the age, sex and deprivation of the population served by each Trust.  
50  
51  
52  
53  
54  
55  
56  
57  
58  
59  
60

## Discussion

This study demonstrates the feasibility of estimating age-specific catchment populations for Trusts within the English NHS. We then show two ways in which these findings may be applied to inform planning of health services, and support quality improvement activities and research. First, we illustrate how catchment populations in London have changed following recent mergers and other service reconfigurations. Second, we use the catchment populations to calculate admission rates per 100 000 CYP for each NHS Trust. These data show that admission rates vary 11-fold between Trusts providing acute general paediatric services for epilepsy admissions (4 fold when excluding extremes) and 2.9-fold (2.3-fold) for all-cause admissions in this age group.

Strengths of this study are the use of robust methodology for estimating hospital catchment populations, which has been validated and used extensively by Public Health England for adult and all-age populations. Another strength of the study is the quality and completeness of Hospital Episode Statistics, which are subject to extensive cleaning and quality assurance processes, and cover 98-99% all hospital care in England.<sup>(9, 10)</sup> This includes the vast majority of healthcare provided for CYP resident in the UK, making HES data the largest unified dataset of its kind in the world. These data may be particularly useful in performing national-level analyses of variation, where chance findings of very high or low admission rates due to small numbers of patients with a particular condition attending a specific hospital are likely to even out. Another strength is the ability to adjust or standardise for population differences, including age, sex and deprivation, so that fair comparisons can be made between services.

One important limitation of this study is that in order to maximise data in each LSOA (median CYP population is approximately 300), all inpatient activity within this age group is included. Our model does not account of the fact that parents or CYP who live a similar distance from two hospitals might (for example) choose to attend Hospital A if their child needed elective surgery by an Ear, Nose and Throat surgeon but attend Hospital B for acute abdominal pain. In adult populations, there is some

1  
2  
3 evidence that patients are willing to travel further to access elective care compared to emergency  
4 care.(11) As noted above, caution must be used in interpreting results for any specific hospital,  
5 especially when looking at single conditions affecting a relatively small number of patients. Another  
6 caveat is that these data will be most useful in comparing like with like – for example, all District  
7 General Hospitals providing acute general paediatric care, or all tertiary children’s hospitals. As  
8 illustrated in Table 2 and Appendix Table A4, calculated admission rates for specialist hospitals, or  
9 those only providing care for neonates or CYP over the age of 16, may be very high or very low  
10 compared to those of general hospitals. Finally, for the small number of hospitals where postcode  
11 information is less than 95% complete, the HCPs and admission rates should be interpreted with  
12 caution (see Methods section and Appendix Table A5 for further details).  
13  
14  
15  
16  
17  
18  
19  
20  
21  
22  
23

24 To our knowledge, this study is the first to report hospital catchment populations for paediatric care  
25 in England. Previous studies in adult populations and other countries have described a range of  
26 methods for estimating catchment populations, including proportionate flow or Norris-Bailey  
27 methods (as used in this study),(5) k-means clustering of multivariate data,(13) kernel analyses,  
28 (14)and ‘de facto service areas’ in which the population of each LSOA is allocated to the catchment  
29 population of a single hospital using a Bayesian approach.(15) Further research using different  
30 methodological approaches to calculate HCPs for CYP would be a useful way to investigate the  
31 robustness of our model, and may allow clearer ways of presenting maps of HCPs.  
32  
33  
34  
35  
36  
37  
38  
39  
40  
41

42 The most useful approaches to do this are likely to be based on further analyses of HES data.  
43 Compared to hospital catchment populations based on survey data (as reported in early studies of  
44 geographical variation)(12) use of HES data has the advantage of being efficient (as it is based on  
45 existing, routinely-collected data that have already been extensively cleaned and quality assured),  
46 robust (as it uses data collected at the time of use, rather than being based on retrospective  
47 patient/family recall or on hypothetical questions about where care would be accessed if needed in  
48 the future) and has high levels of completeness (as it is not limited by survey response rate).  
49  
50  
51  
52  
53  
54  
55  
56  
57  
58  
59  
60



1  
2  
3 As in adult populations, we believe that age-specific hospital catchment populations for CYP will  
4  
5 provide a useful evidence base to support operational decisions, quality improvement work and  
6  
7 future research related to hospital services.(16) For example, data used to calculate each catchment  
8  
9 population can be used to create a detailed map of all CYP served by any hospital. As well as tracking  
10  
11 changes in the HCP following reconfiguration (as shown in Table 1), in the future HCP mapping data  
12  
13 could be used to model the impact of service reconfiguration and merger plans, so reducing the  
14  
15 uncertainty and disruption to services that often occurs at present. Regarding quality improvement  
16  
17 projects, existing indicators are often published at Local Authority level, across a population that  
18  
19 may be served by many different hospitals. Previous research has shown that indicators mapped  
20  
21 directly to specific clinical teams promote clinical engagement and accountability.(17) Further, they  
22  
23 can identify specific strengths or weaknesses of individual services and so inform tailored quality  
24  
25 improvement initiatives. Lastly, HCPs have potential to open up exciting new avenues of research  
26  
27 within paediatric services. For example, the national clinical audit for paediatric epilepsy (Epilepsy12)  
28  
29 has collected detailed information on paediatric epilepsy services in England since 2011, but to date  
30  
31 it has not been possible to link these data to admission rates, due to lack of an appropriate  
32  
33 denominator. Such linkage would allow robust investigation of the impact on improving  
34  
35 performance in different aspects of epilepsy care on unit-level admission rates. Similarly, attempts  
36  
37 to study and reduce geographical variation by specialist networks such as those for paediatric  
38  
39 surgery or gastroenterology services have been limited by lack of appropriate denominator data.  
40  
41 HCPs will allow admission and activity rates to be compared between areas and facilitate study of  
42  
43 unmet need and/or overuse of admissions or procedures.  
44  
45  
46  
47  
48  
49

## 50 **Conclusions**

51  
52  
53 This paper presents a method for calculating hospital catchment populations for the care of children  
54  
55 and young people in the English NHS. We then show how this method allows comparison of  
56  
57

1  
2  
3 paediatric admission rates between hospitals, adjusting for population characteristics including sex,  
4 age, and deprivation. Lastly, we illustrate how these adjusted admission rates may be useful for the  
5 purposes of commissioning and improving services, as well as for quality improvement and research  
6 activities.  
7  
8  
9  
10  
11  
12  
13  
14  
15  
16  
17

#### 18 **Funding statement**

19  
20 This work was supported by The Health Foundation (Award Reference Number 7383).  
21  
22

#### 23 **Competing interest statement**

24  
25 We declare no competing interests.  
26  
27  
28

#### 29 **Author contributions**

30  
31 All authors were involved in the design of this study and in revising the manuscript. SA and CSJ  
32 performed all analyses. SA and DSH wrote the first draft of the manuscript.  
33  
34  
35  
36

#### 37 **Data sharing statement**

38  
39 SAS code used for all analyses is available from the authors on request.  
40  
41  
42  
43  
44  
45  
46  
47  
48  
49  
50  
51  
52  
53  
54  
55  
56  
57  
58  
59  
60

## References

1. Davies SC. Our children deserve better: Prevention pays. Annual report of the Chief Medical Officer 2012. . London: 2013. .
2. RightCare. NHS Atlas of Variation in Healthcare. 2015.
3. The\_Dartmouth\_Atlas\_of\_Healthcare. Research Methods.
4. Perry J. Hospital Trust Catchment populations: A denominator to support commissioning decisions through understanding the population likely to draw on a hospital's services. ePoster Library of PHE. 2017;186476.
5. Brown P, Ho D, Shaw ME, Verne J, Trotter CL. Estimating catchment populations in the South West: why and how. UK Public Health Association Annual Conference, Telford2006.
6. Hospital Episode Statistics. Available from: <http://content.digital.nhs.uk/hes> (accessed 9th February 2018).
7. Lower Layer Super Output Areas (LSOAs). Available from: <https://data.gov.uk/dataset/lower-layer-super-output-areas-isoas> (accessed 9th February 2018).
8. English Indices of Deprivation 2015. Available from: <https://www.gov.uk/government/statistics/english-indices-of-deprivation-2015> (accessed 9th February 2018).
9. Herbert A, Wijlaars L, Zylbersztejn A, Cromwell D, Hardelid P. Data Resource Profile: Hospital Episode Statistics Admitted Patient Care (HES APC). International Journal of Epidemiology. 2017;46(4):1093-i.
10. National\_Audit\_Office. Healthcare Across the UK: A Comparison of the NHS in England, Scotland, Wales and Northern Ireland . 2012. . 2012.
11. Propper C, Damiani M, Leckie G, Dixon J. Impact of patients' socioeconomic status on the distance travelled for hospital admission in the English National Health Service. Journal of health services research & policy. 2007;12(3):153-9.
12. Wennberg J, McPherson K, Goodman D. Small Area Analysis and the Challenge of Practice Variation. In: Johnson A, Stukel T, editors. Medical Practice Variations. Boston, MA: Springer US; 2016. p. 1-25.
13. Gilmour SJ. Identification of hospital catchment areas using clustering: an example from the NHS. Health services research. 2010;45(2):497-513.
14. Sofianopoulou E, Rushton S, Rubin G, Pless-Mulloli T. Defining GP practice areas based on true service utilisation. Health & place. 2012;18(6):1248-54.
15. McPherson D. Avoidable harm, unwarranted variation and diffusion in the treatment of acute myocardial infarction. 2015.
16. Wennberg JE. Time to tackle unwarranted variations in practice. BMJ. 2011;342.
17. NHS National Quality Board. Available from: <https://www.england.nhs.uk/ourwork/part-rel/nqb/> (accessed 9<sup>th</sup> February 2018).
18. <http://webarchive.nationalarchives.gov.uk/20170106081150/http://www.apho.org.uk/RESOURCE/VIEW.ASPX?RID=178644>

**Table 1. Paediatric Hospital Catchment Populations in London by year, standardised for age, sex and deprivation**

| Trust code | Organisation name                                              | 2011/12 | 2012/13 | 2013/14 | 2014/15 |
|------------|----------------------------------------------------------------|---------|---------|---------|---------|
| R1H        | Barts Health NHS Trust                                         | 12668   | 267307  | 270243  | 268558  |
| RF4        | Barking, Havering and Redbridge University Hospitals NHS Trust | 197275  | 149765  | 149133  | 145366  |
| RVL        | Barnet and Chase Farm Hospitals NHS Trust                      | 127294  | 127254  | 113094  | .       |
| RQM        | Chelsea and Westminster Hospital NHS Foundation Trust          | 90449   | 93355   | 88865   | 86439   |
| RJ6        | Croydon Health Services NHS Trust*                             | 81355   | 78015   | 78090   | 77160   |
| RC3        | Ealing Hospital NHS Trust                                      | 58077   | 53775   | 52820   | .       |
| RVR        | Epsom and St Helier University Hospitals NHS Trust             | 87348   | 83731   | 81162   | 85745   |
| RP4        | Great Ormond Street Hospital NHS Trust*                        | 44418   | 17789   | 7456    | 6236    |
| RJ1        | Guy's and St Thomas' NHS Foundation Trust                      | 85083   | 69753   | 71571   | 64902   |
| RQX        | Homerton University Hospital NHS Foundation Trust              | 89851   | 52951   | 52578   | 49332   |
| RYJ        | Imperial College Healthcare NHS Trust*                         | 72424   | 67571   | 74510   | 75876   |
| RJZ        | King's College Hospital NHS Foundation Trust                   | 88602   | 86947   | 148099  | 150224  |
| RAX        | Kingston Hospital NHS Trust                                    | 75380   | 68716   | 69583   | 70421   |
| R1K        | London North West Healthcare NHS Trust                         | .       | .       | 486     | 166660  |
| RP6        | Moorfields Eye Hospital NHS Foundation Trust                   | 1824    | 916     | 916     | 843     |
| RAP        | North Middlesex University Hospital NHS Trust                  | 69610   | 59956   | 74570   | 96137   |
| RV8        | North West London Hospitals NHS Trust                          | 124936  | 122553  | 120266  | .       |
| RT3        | Royal Brompton and Harefield NHS                               | 5283    | 4361    | 3825    | 3899    |

|     |                                                          |        |        |        |        |
|-----|----------------------------------------------------------|--------|--------|--------|--------|
|     | Foundation Trust                                         |        |        |        |        |
| RAL | Royal Free Hampstead NHS Trust                           | 52443  | 50068  | 48224  | 155113 |
| RYQ | South London Healthcare NHS Trust                        | 139032 | 147968 | 39830  | .      |
| RJ7 | St George's Healthcare NHS Trust                         | 103559 | 109089 | 113127 | 118041 |
| RAS | The Hillingdon Hospital NHS Trust                        | 65107  | 61012  | 61198  | 65195  |
| RJ2 | The Lewisham Healthcare NHS Trust                        | 62637  | 61055  | 103280 | 151669 |
| RPY | The Royal Marsden NHS Foundation Trust                   | 382    | 216    | 348    | 104    |
| RAN | The Royal National Orthopaedic Hospital NHS Trust        | 973    | 529    | 289    | 409    |
| RRV | University College London Hospitals NHS Foundation Trust | 52193  | 39854  | 42780  | 42106  |
| RFW | West Middlesex University NHS Trust                      | 59734  | 65428  | 67430  | 63584  |
| RKE | Whittington Hospital NHS Trust                           | 53355  | 50811  | 51311  | 50647  |

## Notes.

1. Hospital Catchment Populations are estimated based on the proportion of children and young people ( $\leq 18$  years) from each Lower Super Output Area (LSOA) who attend each NHS Trust in any given year for planned or unplanned care. See Methods section for full details.
2. Although all Trust are presented for completeness, the catchment population is more meaningful and useful when applied to Trusts that provide general paediatric services than to specialist Trusts (for example, Moorfields Eye Hospital, Great Ormond Street Hospital, The Royal Marsden Hospital, The Royal National Orthopaedic Hospital).
3. Where large changes occur between years, this typically reflects mergers or reconfiguration. For example, during the study period, Barnet and Chase Farm Hospitals NHS Trust merged with Royal Free Hampstead NHS Trust and there was extensive reconfiguration of services in North West London (North-West London Hospitals NHS Trust, Ealing Hospital NHS Trust and London North West Healthcare NHS Trust).
4. \*denotes Trusts where LSOA data are missing on  $\geq 5.0\%$  of hospital admissions (meaning that the catchment populations should be interpreted with more caution). The exact proportion of admissions with missing LSOA data in each Trust are presented in Appendix Table A5.

**Table 2. Paediatric admission rates by Trust for primary diagnosis epilepsy, any diagnosis epilepsy, all-cause admissions, per 100,000, 2014/15, England.**

|                                                                | Primary diagnosis epilepsy | Any epilepsy diagnosis | All-cause admission |
|----------------------------------------------------------------|----------------------------|------------------------|---------------------|
| The Walton Centre NHS Foundation Trust*                        | 355.7                      | 1067.1                 | 12094.0             |
| Great Ormond Street Hospital NHS Trust*                        | 256.6                      | 513.1                  | 9813.4              |
| Royal Wolverhampton Hospital NHS Trust                         | 157.7                      | 305.3                  | 10141.8             |
| Newcastle Upon Tyne Hospitals NHS Foundation Trust             | 152.1                      | 379.9                  | 11426.3             |
| Milton Keynes Hospital NHS Foundation Trust                    | 144.0                      | 328.8                  | 9422.8              |
| Burton Hospitals NHS Foundation Trust                          | 143.0                      | 255.0                  | 7519.6              |
| Birmingham Children's Hospital NHS Foundation Trust            | 129.6                      | 325.0                  | 8589.4              |
| Medway NHS Trust                                               | 124.9                      | 266.2                  | 8812.1              |
| East Cheshire NHS Trust                                        | 122.5                      | 284.0                  | 8843.7              |
| North Lincolnshire and Goole Hosps NHS Foundation Trust        | 114.4                      | 231.0                  | 6257.7              |
| East Sussex Hospitals NHS Trust                                | 113.1                      | 182.5                  | 8106.3              |
| South Tees Hospitals NHS Foundation Trust                      | 112.0                      | 297.4                  | 10096.1             |
| Guy's and St Thomas' NHS Foundation Trust                      | 109.4                      | 218.8                  | 6577.6              |
| Hereford Hospitals NHS Trust*                                  | 107.3                      | 199.3                  | 8188.1              |
| Kettering General Hospital NHS Foundation Trust                | 106.8                      | 195.7                  | 7749.6              |
| Hull and East Yorkshire Hospitals NHS Trust                    | 105.4                      | 216.4                  | 6017.1              |
| Blackpool Fylde and Wyre NHS Foundation Trust                  | 104.3                      | 258.3                  | 10864.7             |
| York Hospitals NHS Trust                                       | 102.6                      | 179.3                  | 7404.7              |
| Isle of wight NHS Trust                                        | 100.3                      | 183.2                  | 8031.5              |
| University Hospital Birmingham NHS Foundation Trust            | 100.2                      | 264.2                  | 6959.0              |
| Northampton General Hospital NHS Trust                         | 99.8                       | 261.9                  | 9309.2              |
| The Mid Cheshire Hospitals NHS Trust                           | 98.8                       | 259.3                  | 7949.0              |
| Barnsley Dist Gen Hosp NHS Foundation Trust                    | 98.2                       | 196.4                  | 8854.7              |
| Basingstoke and North Hampshire Hospitals NHS Foundation Trust | 97.6                       | 180.0                  | 6316.6              |
| Queen Elizabeth Hospital Kings Lynn NHS Foundation Trust       | 96.4                       | 251.1                  | 9249.2              |
| Southampton University Hospitals NHS Trust                     | 96.2                       | 190.7                  | 8404.6              |
| Wrightington, Wigan and Leigh NHS Foundation Trust             | 95.2                       | 209.8                  | 6028.8              |
| Colchester Hospital University NHS Foundation Trust            | 94.6                       | 269.2                  | 9264.7              |
| University Hospitals Coventry and Warwickshire NHS Trust       | 94.0                       | 182.6                  | 6563.3              |
| University Hospitals Of Morecambe Bay NHS Foundation Trust     | 93.4                       | 246.6                  | 9887.3              |
| University Hospital Of North Staffordshire Hospital NHS Trust  | 93.3                       | 252.4                  | 10355.7             |
| Stockport NHS Foundation Trust                                 | 92.8                       | 174.6                  | 8713.0              |
| Chesterfield Royal Hospital NHS Foundation Trust               | 91.9                       | 187.3                  | 7895.4              |
| County Durham and Darlington NHS Foundation Trust              | 91.8                       | 221.2                  | 10262.4             |
| Salford Royal NHS Foundation Trust                             | 91.5                       | 142.9                  | 8400.8              |
| North Cumbria University Hospitals NHS Trust                   | 91.4                       | 173.8                  | 8744.8              |
| Royal Berkshire Hospital NHS Foundation Trust                  | 91.3                       | 164.7                  | 5453.0              |
| Tameside Hospital NHS Foundation Trust                         | 90.3                       | 199.1                  | 9045.9              |
| Calderdale and Huddersfield NHS Foundation Trust               | 88.8                       | 186.0                  | 7870.2              |
| East and North Hertfordshire NHS Trust                         | 88.5                       | 147.5                  | 6795.2              |
| Royal Devon and Exeter NHS Foundation Trust                    | 86.8                       | 190.2                  | 7764.1              |
| Royal Cornwall Hospitals NHS Trust                             | 86.2                       | 183.2                  | 7558.5              |
| Central Manchester University Hospitals NHS Foundation Trust   | 85.6                       | 256.1                  | 10200.2             |
| Homerton University Hospital NHS Foundation Trust              | 85.1                       | 137.8                  | 5221.7              |
| South Warwickshire NHS Foundation Trust*                       | 83.6                       | 173.7                  | 7465.3              |
| Norfolk and Norwich University Hospitals NHS Foundation Trust  | 83.6                       | 213.7                  | 7320.5              |
| Portsmouth Hospitals NHS Trust                                 | 83.6                       | 167.2                  | 5949.4              |
| King's College Hospital NHS Foundation Trust                   | 83.2                       | 132.5                  | 5246.2              |
| Plymouth Hospitals NHS Trust                                   | 83.1                       | 174.8                  | 7607.1              |
| West Suffolk Hospital NHS Trust                                | 82.5                       | 173.9                  | 7037.4              |
| Northumbria Healthcare NHS Foundation Trust                    | 82.5                       | 165.1                  | 8390.3              |

|    |                                                                 |      |       |         |
|----|-----------------------------------------------------------------|------|-------|---------|
| 1  |                                                                 |      |       |         |
| 2  |                                                                 |      |       |         |
| 3  | Luton and Dunstable Hospital NHS Foundation Trust               | 82.0 | 195.2 | 8913.8  |
| 4  | Taunton and Somerset NHS Foundation Trust                       | 81.7 | 202.7 | 7129.9  |
| 5  | Warrington and Halton Hospitals NHS Foundation Trust            | 81.4 | 131.9 | 8218.6  |
| 6  | Peterborough and Stamford Hospitals NHS Foundation Trust        | 80.7 | 225.6 | 8728.8  |
| 7  | Pennine Acute Hospitals NHS Trust                               | 80.5 | 196.2 | 10147.4 |
| 8  | North Tees and Hartlepool NHS Foundation Trust                  | 80.2 | 217.8 | 8251.5  |
| 9  | Walsall Hospitals NHS Trust                                     | 78.8 | 152.3 | 5444.2  |
| 10 | North Middlesex University Hospital NHS Trust                   | 78.0 | 145.6 | 7918.9  |
| 11 | City Hospitals Sunderland NHS Foundation Trust                  | 77.0 | 191.7 | 8367.6  |
| 12 | The Hillingdon Hospital NHS Trust                               | 76.7 | 162.6 | 6857.8  |
| 13 | Frimley Park Hospital NHS Trust                                 | 75.8 | 158.4 | 6851.2  |
| 14 | South Devon Health Care NHS Trust                               | 75.1 | 181.9 | 5448.0  |
| 15 | East Kent Hospitals University NHS Foundation Trust             | 74.7 | 166.2 | 7619.1  |
| 16 | East Lancashire Hospitals NHS Trust                             | 74.2 | 277.9 | 11681.2 |
| 17 | Bradford Teaching Hospitals NHS Foundation Trust                | 73.9 | 222.5 | 6588.3  |
| 18 | Nottingham University Hospitals NHS Trust                       | 73.0 | 159.4 | 5107.2  |
| 19 | Doncaster and Bassetlaw Hospitals NHS Foundation Trust          | 72.8 | 142.7 | 9385.1  |
| 20 | Basildon and Thurrock University Hospitals NHS Foundation Trust | 72.3 | 117.4 | 4185.1  |
| 21 | Sandwell and West Birmingham Hospitals NHS Trust                | 71.9 | 160.7 | 8798.9  |
| 22 | Bedford Hospital NHS Trust                                      | 71.8 | 168.3 | 5739.2  |
| 23 | Sheffield Children's NHS Foundation Trust                       | 71.4 | 203.5 | 6942.5  |
| 24 | Airedale NHS Foundation Trust                                   | 71.3 | 329.1 | 9150.7  |
| 25 | Western Sussex Hospitals NHS Trust                              | 71.2 | 176.5 | 7923.9  |
| 26 | Imperial College Healthcare NHS Trust*                          | 71.2 | 146.3 | 4707.7  |
| 27 | Birmingham Heartlands and Solihull Trust                        | 70.5 | 140.5 | 7708.0  |
| 28 | Mid Yorkshire Hospitals NHS Trust                               | 70.2 | 155.4 | 7419.2  |
| 29 | Royal Bolton Hospital NHS Foundation Trust                      | 70.0 | 179.1 | 8819.4  |
| 30 | Dartford and Gravesham NHS Trust                                | 69.4 | 149.2 | 7885.0  |
| 31 | Barts Health NHS Trust                                          | 69.3 | 149.3 | 5890.0  |
| 32 | Southport and Ormskirk Hospital NHS Trust                       | 69.2 | 132.7 | 8094.0  |
| 33 | Weston Area Health NHS Trust                                    | 69.0 | 122.7 | 6479.8  |
| 34 | Poole Hospital NHS Foundation Trust                             | 68.8 | 256.6 | 8106.0  |
| 35 | Royal United Hospital Bath NHS Trust                            | 68.5 | 193.4 | 6530.5  |
| 36 | Wirral University Teaching Hospital NHS Foundation Trust        | 67.9 | 239.8 | 7375.9  |
| 37 | University Hospitals Of Bristol NHS Foundation Trust            | 67.1 | 148.1 | 5637.4  |
| 38 | Ashford and St Peter's Hospitals NHS Foundation Trust           | 67.1 | 107.4 | 5105.2  |
| 39 | Shrewsbury and Telford Hospital NHS Trust*                      | 66.4 | 162.2 | 7580.5  |
| 40 | James Paget University Hospitals NHS Foundation Trust           | 66.1 | 116.3 | 6048.3  |
| 41 | The Lewisham Healthcare NHS Trust                               | 65.9 | 136.5 | 7769.5  |
| 42 | Lancashire Teaching Hospitals NHS Trust                         | 63.8 | 171.9 | 10193.4 |
| 43 | Epsom and St Helier University Hospitals NHS Trust              | 63.0 | 178.4 | 5285.4  |
| 44 | St George's Healthcare NHS Trust                                | 62.7 | 127.1 | 5969.1  |
| 45 | Cambridgeshire Community Services NHS Trust                     | 62.5 | 185.0 | 9188.9  |
| 46 | Royal Free Hampstead NHS Trust                                  | 62.5 | 136.0 | 5601.1  |
| 47 | University Hospitals Of Leicester NHS Trust                     | 62.4 | 144.0 | 4944.3  |
| 48 | Cambridge University Hospitals NHS Foundation Trust             | 61.3 | 197.6 | 5058.8  |
| 49 | Maidstone and Tunbridge Wells NHS Trust                         | 61.3 | 93.8  | 4536.7  |
| 50 | Worcestershire Acute Hospitals NHS Trust                        | 60.6 | 144.5 | 6155.0  |
| 51 | Ipswich Hospital NHS Trust                                      | 60.2 | 176.5 | 6566.3  |
| 52 | Leeds Teaching Hospitals NHS Trust                              | 60.1 | 165.8 | 6160.5  |
| 53 | Hinchingbrooke Healthcare NHS Trust                             | 59.4 | 89.0  | 6738.0  |
| 54 | Oxford Radcliffe Hospital NHS Trust                             | 58.5 | 156.0 | 6662.5  |
| 55 | Countess Of Chester Hospital NHS Foundation Trust*              | 57.9 | 157.4 | 9156.6  |
| 56 | Dorset County Hospital NHS Foundation Trust                     | 56.8 | 144.5 | 6294.7  |
| 57 | The Dudley Group Of Hospitals NHS Foundation Trust              | 56.4 | 143.6 | 8559.8  |
| 58 | Gloucestershire Hospitals NHS Foundation Trust                  | 56.1 | 164.8 | 6854.3  |
| 59 | London North West Healthcare NHS Trust                          | 55.8 | 124.8 | 5098.4  |
| 60 | Whittington Hospital NHS Trust                                  | 55.3 | 116.5 | 6677.6  |
|    | The Rotherham NHS Foundation Trust                              | 55.2 | 154.1 | 7337.8  |
|    | Royal Surrey County NHS Foundation Trust                        | 54.7 | 106.4 | 5398.3  |
|    | Derby Hospitals NHS Foundation Trust                            | 54.1 | 115.0 | 4096.0  |
|    | West Hertfordshire Hospitals NHS Trust                          | 53.5 | 114.3 | 5621.5  |

1

2

3

4

5

6

7

8

9

10

11

12

13

14

15

16

17

18

19

20

21

22

23

24

25

26

27

28

29

30

31

32

33

34

35

36

37

38

39

40

41

42

43

44

45

46

47

48

49

50

51

52

53

54

55

56

57

58

59

60

|                                                                |      |        |          |
|----------------------------------------------------------------|------|--------|----------|
| United Lincolnshire Hospitals NHS Trust                        | 53.4 | 182.4  | 6992.8   |
| Buckinghamshire Healthcare NHS Trust                           | 53.2 | 137.6  | 7632.4   |
| Croydon Health Services NHS Trust*                             | 53.1 | 73.9   | 5373.3   |
| Yeovil District Hospital NHS Foundation Trust                  | 52.9 | 136.4  | 6074.1   |
| West Middlesex University NHS Trust                            | 51.9 | 166.7  | 4872.3   |
| University Hospital Of South Manchester NHS Foundation Trust   | 51.8 | 126.0  | 8586.4   |
| South Tyneside NHS Foundation Trust                            | 50.8 | 88.9   | 6751.4   |
| Royal Bournemouth and Christchurch Trust*                      | 49.9 | 99.9   | 7041.3   |
| Great Western Hospitals NHS Foundation Trust                   | 49.9 | 141.2  | 7058.8   |
| Barking, Havering and Redbridge University Hospitals NHS Trust | 46.8 | 93.6   | 4662.0   |
| Mid Staffordshire NHS Foundation Trust                         | 45.7 | 99.1   | 9815.2   |
| Alder Hey Childrens NHS Foundation Trust                       | 45.4 | 188.4  | 7766.6   |
| Princess Alexandra Hospital NHS Trust                          | 45.2 | 85.6   | 4438.7   |
| Gateshead Health NHS Foundation Trust                          | 43.5 | 81.5   | 8388.4   |
| Surrey and Sussex Healthcare NHS Trust                         | 43.1 | 108.8  | 4767.3   |
| St Helens and Knowsley Hospitals NHS Trust                     | 41.2 | 126.5  | 9790.2   |
| Northern Devon Healthcare NHS Trust                            | 40.2 | 158.0  | 7260.0   |
| Southend University Hospitals NHS Foundation Trust             | 37.9 | 116.6  | 4292.9   |
| Brighton and Sussex University Hospitals NHS Trust             | 37.0 | 115.9  | 5926.0   |
| Kingston Hospital NHS Trust                                    | 36.9 | 98.0   | 5332.2   |
| Mid Essex Hospital Services NHS Trust                          | 36.8 | 86.6   | 5326.2   |
| Sherwood Forest Hospitals NHS Foundation Trust                 | 36.7 | 138.5  | 6892.1   |
| Salisbury NHS Foundation Trust                                 | 35.7 | 109.1  | 4912.0   |
| Chelsea and Westminster Hospital NHS Foundation Trust          | 34.7 | 65.9   | 4932.9   |
| North Bristol NHS Trust                                        | 30.9 | 87.5   | 5016.8   |
| Harrogate and District NHS Foundation Trust                    | 29.6 | 96.2   | 7761.3   |
| University College London Hospitals NHS Foundation Trust       | 28.5 | 54.6   | 4032.6   |
| Aintree University Hospitals NHS Foundation Trust              | 27.7 | 73.7   | 6240.5   |
| Royal Liverpool Broadgreen Hospitals NHS Trust                 | 24.8 | 74.3   | 5871.3   |
| Sheffield Teaching Hospitals NHS Foundation Trust              | 14.3 | 28.7   | 4752.9   |
| George Eliot Hospital NHS Trust                                | 5.2  | 20.6   | 5717.0   |
| The Royal Marsden NHS Foundation Trust                         | 0.0  | 963.5  | 104056.3 |
| Liverpool Heart and Chest NHS Foundation Trust                 | 0.0  | 0.0    | 29608.9  |
| Christie Hospital NHS Trust                                    | 0.0  | 0.0    | 26449.3  |
| Papworth Hospital NHS Foundation Trust                         | 0.0  | 1444.5 | 21666.9  |
| Clatterbridge Centre For Oncology NHS Foundation Trust         | 0.0  | 0.0    | 15534.8  |
| The Royal National Orthopaedic Hospital NHS Trust              | 0.0  | 489.4  | 11500.7  |
| Royal Brompton and Harefield NHS Foundation Trust              | 0.0  | 153.9  | 8131.0   |
| Liverpool Womens Hospital NHS Trust                            | 0.0  | 0.0    | 6464.3   |
| Royal Orthopaedic Hospital NHS Foundation Trust                | 0.0  | 246.8  | 6170.2   |
| Moorfields Eye Hospital NHS Foundation Trust                   | 0.0  | 0.0    | 5217.1   |
| Birmingham Women's NHS Foundation Trust                        | 0.0  | 0.0    | 4659.7   |
| Robert Jones and Agnes Hunt Orthopaedic NHS Trust              | 0.0  | 0.0    | 4316.4   |
| Queen Victoria Hospital NHS Foundation Trust                   | 0.0  | 24.3   | 4251.8   |

\*denotes Trusts where Lower Layer Super Output Area (LSOA) data are missing on  $\geq 5.0\%$  of hospital admissions (meaning that the catchment populations and admission rates should be interpreted with more caution). The exact proportion of admissions with missing LSOA data by Trust are presented in Appendix Table A5.



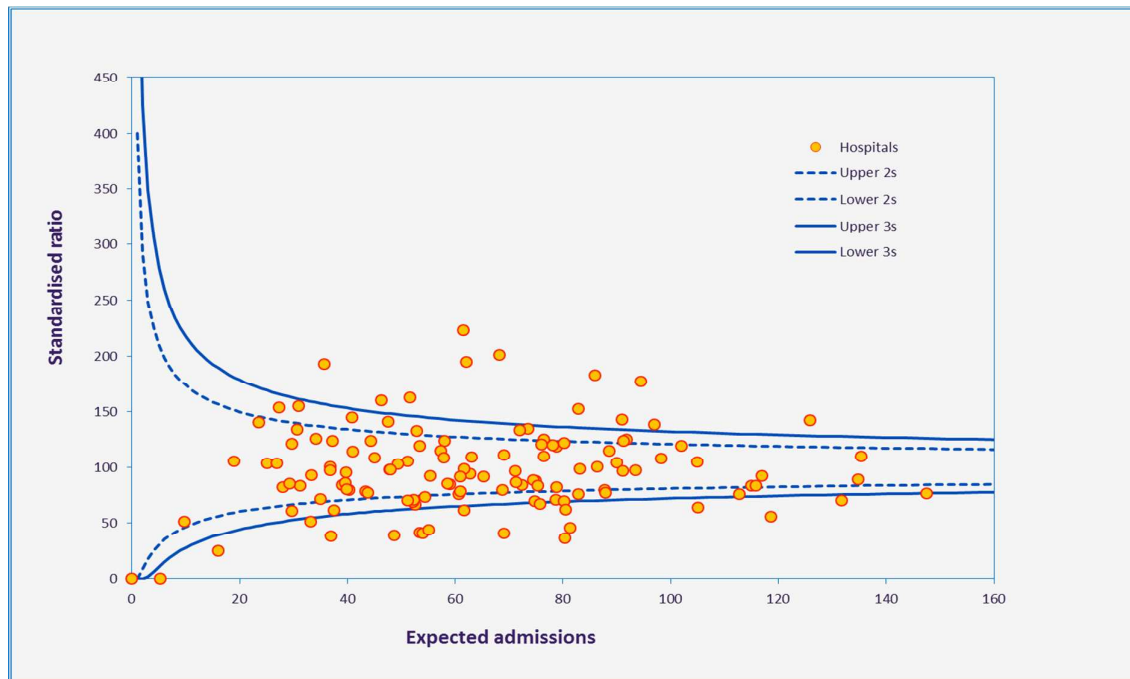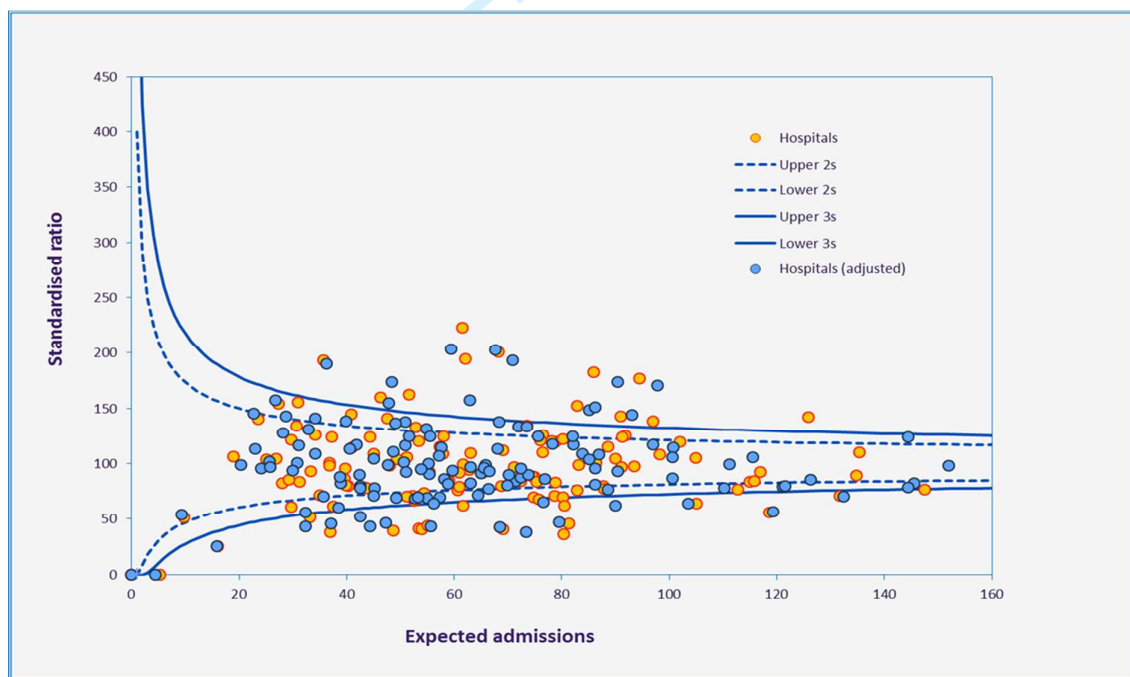

**Figure 1. Funnel plot showing ratio of observed: expected paediatric epilepsy admissions in English Hospital Trusts, 2014/15.**

## Appendix Table A1

**Paediatric hospital catchment populations by Trust and year, English  
Hospital Episode Statistics 2011/12-2014/15**

| Trustcode | Trust name                                                      | Region                   | Catchment population, standardised for age, sex, Index of Multiple Deprivation |         |         |         |
|-----------|-----------------------------------------------------------------|--------------------------|--------------------------------------------------------------------------------|---------|---------|---------|
|           |                                                                 |                          | 2011/12                                                                        | 2012/13 | 2013/14 | 2014/15 |
| REM       | Aintree University Hospitals NHS Foundation Trust               | North West               | 10023                                                                          | 10327   | 8631    | 10848   |
| RCF       | Airedale NHS Foundation Trust                                   | Yorkshire and The Humber | 41949                                                                          | 39720   | 43968   | 43450   |
| RBS       | Alder Hey Childrens NHS Foundation Trust                        | North West               | 135592                                                                         | 135873  | 135226  | 134281  |
| RTK       | Ashford and St Peter's Hospitals NHS Foundation Trust           | South East Coast         | 67507                                                                          | 66359   | 67714   | 67049   |
| RF4       | Barking, Havering and Redbridge University Hospitals NHS Trust  | London                   | 197275                                                                         | 149765  | 149133  | 145366  |
| RVL       | Barnet and Chase Farm Hospitals NHS Trust                       | London                   | 127294                                                                         | 127254  | 113094  | .       |
| RFF       | Barnsley Dist Gen Hosp NHS Foundation Trust                     | Yorkshire and The Humber | 50808                                                                          | 51686   | 51165   | 52966   |
| R1H       | Barts Health NHS Trust                                          | London                   | 12668                                                                          | 267307  | 270243  | 268558  |
| RDD       | Basildon and Thurrock University Hospitals NHS Foundation Trust | East of England          | 78568                                                                          | 72928   | 75975   | 77489   |
| RN5       | Basingstoke and North Hampshire Hospitals NHS Foundation Trust  | South Central            | 85695                                                                          | 102867  | 101435  | 99421   |
| RC1       | Bedford Hospital NHS Trust                                      | East of England          | 47451                                                                          | 49333   | 32284   | 48718   |
| RQ3       | Birmingham Children's Hospital NHS Foundation Trust             | West Midlands            | 167662                                                                         | 166577  | 162074  | 159686  |
| RR1       | Birmingham Heartlands and Solihull Trust                        | West Midlands            | 179182                                                                         | 175711  | 173618  | 180098  |
| RLU       | Birmingham Women's NHS Foundation Trust                         | West Midlands            | 2622                                                                           | 2783    | 2526    | 2897    |
| RXL       | Blackpool Fylde and Wyre NHS Foundation Trust                   | North West               | 58761                                                                          | 59309   | 59561   | 60397   |
| RAE       | Bradford Teaching Hospitals NHS Foundation Trust                | Yorkshire and The Humber | 113843                                                                         | 114617  | 111292  | 111030  |
| RXH       | Brighton and Sussex University Hospitals NHS Trust              | South East Coast         | 95573                                                                          | 99438   | 103746  | 105282  |
| RXQ       | Buckinghamshire Healthcare NHS Trust                            | South Central            | 102622                                                                         | 99708   | 96197   | 99550   |
| RJF       | Burton Hospitals NHS Foundation Trust                           | West Midlands            | 58296                                                                          | 60052   | 62031   | 61559   |
| RWY       | Calderdale and Huddersfield NHS Foundation Trust                | Yorkshire and The Humber | 96587                                                                          | 95166   | 96430   | 95715   |
| RGT       | Cambridge University Hospitals NHS Foundation Trust             | East of England          | 94724                                                                          | 93112   | 94595   | 94647   |
| RYV       | Cambridgeshire Community Services NHS Trust                     | East of England          | 36498                                                                          | 38274   | 38476   | 38372   |
| RW3       | Central Manchester University Hospitals NHS Foundation Trust    | North West               | 129668                                                                         | 123097  | 131327  | 134340  |
| RQM       | Chelsea and Westminster Hospital NHS Foundation Trust           | London                   | 90449                                                                          | 93355   | 88865   | 86439   |
| RFS       | Chesterfield Royal Hospital NHS Foundation Trust                | East Midlands            | 55086                                                                          | 56540   | 55790   | 56603   |
| RBV       | Christie Hospital NHS Trust                                     | North West               | 249                                                                            | 71      | 202     | 231     |
| RLN       | City Hospitals Sunderland NHS Foundation Trust                  | North East               | 61855                                                                          | 60998   | 63551   | 63650   |
| REN       | Clatterbridge Centre For Oncology NHS Foundation Trust          | North West               | 61                                                                             | 17      | .       | 45      |
| RDE       | Colchester Hospital University NHS Foundation Trust             | East of England          | 72893                                                                          | 71762   | 74634   | 75048   |
| RJR       | Countess Of Chester Hospital NHS Foundation Trust               | North West               | 43561                                                                          | 43650   | 42978   | 43204   |

|    |     |                                                        |                          |        |        |        |        |
|----|-----|--------------------------------------------------------|--------------------------|--------|--------|--------|--------|
| 1  |     |                                                        |                          |        |        |        |        |
| 2  |     |                                                        |                          |        |        |        |        |
| 3  |     | County Durham and Darlington NHS Foundation Trust      | North East               | 107566 | 108332 | 107119 | 108941 |
| 4  | RXP |                                                        |                          |        |        |        |        |
| 5  | RJ6 | Croydon Health Services NHS Trust                      | London                   | 81355  | 78015  | 78090  | 77160  |
| 6  | RN7 | Dartford and Gravesham NHS Trust                       | South East Coast         | 76140  | 73911  | 78523  | 77768  |
| 7  | RTG | Derby Hospitals NHS Foundation Trust                   | East Midlands            | 101760 | 103757 | 104768 | 101709 |
| 8  |     | Doncaster and Bassetlaw Hospitals NHS Foundation Trust | Yorkshire and The Humber | 102095 | 100803 | 98480  | 100244 |
| 9  | RP5 |                                                        |                          |        |        |        |        |
| 10 | RBD | Dorset County Hospital NHS Foundation Trust            | South West               | 40217  | 40655  | 39469  | 38763  |
| 11 | RC3 | Ealing Hospital NHS Trust                              | London                   | 58077  | 53775  | 52820  | .      |
| 12 | RWH | East and North Hertfordshire NHS Trust                 | East of England          | 110674 | 104026 | 106784 | 105074 |
| 13 | RJN | East Cheshire NHS Trust                                | North West               | 38204  | 36740  | 36029  | 35913  |
| 14 |     | East Kent Hospitals University NHS Foundation Trust    | South East Coast         | 137896 | 137059 | 138382 | 141973 |
| 15 | RVV |                                                        |                          |        |        |        |        |
| 16 | RXR | East Lancashire Hospitals NHS Trust                    | North West               | 116271 | 119014 | 118240 | 117300 |
| 17 | RXC | East Sussex Hospitals NHS Trust                        | South East Coast         | 80445  | 77868  | 73828  | 73412  |
| 18 |     | Epsom and St Helier University Hospitals NHS Trust     | London                   | 87348  | 83731  | 81162  | 85745  |
| 19 | RVR |                                                        |                          |        |        |        |        |
| 20 | RDU | Frimley Park Hospital NHS Trust                        | South East Coast         | 80008  | 85799  | 88597  | 190069 |
| 21 | RR7 | Gateshead Health NHS Foundation Trust                  | North East               | 43832  | 43763  | 38241  | 36789  |
| 22 | RLT | George Eliot Hospital NHS Trust                        | West Midlands            | 30544  | 29618  | 20570  | 19381  |
| 23 | RTE | Gloucestershire Hospitals NHS Foundation Trust         | South West               | 120471 | 120927 | 120459 | 119516 |
| 24 | RP4 | Great Ormond Street Hospital NHS Trust                 | London                   | 44418  | 17789  | 7456   | 6236   |
| 25 | RN3 | Great Western Hospitals NHS Foundation Trust           | South West               | 79223  | 78668  | 79347  | 82167  |
| 26 | RJ1 | Guy's and St Thomas' NHS Foundation Trust              | London                   | 85083  | 69753  | 71571  | 64902  |
| 27 | RCD | Harrogate and District NHS Foundation Trust            | Yorkshire and The Humber | 40531  | 40823  | 40145  | 40560  |
| 28 |     | Heatherwood and Wexham Park Hosps NHS Foundation Trust | South Central            | 99093  | 99936  | 100829 | .      |
| 29 | RD7 |                                                        |                          |        |        |        |        |
| 30 | RLQ | Hereford Hospitals NHS Trust                           | West Midlands            | 38422  | 37728  | 38147  | 39130  |
| 31 | RQQ | Hinchingbrooke Healthcare NHS Trust                    | East of England          | 7964   | 6273   | 6811   | 6738   |
| 32 |     | Homerton University Hospital NHS Foundation Trust      | London                   | 89851  | 52951  | 52578  | 49332  |
| 33 | RQX |                                                        |                          |        |        |        |        |
| 34 | RWA | Hull and East Yorkshire Hospitals NHS Trust            | Yorkshire and The Humber | 105424 | 106722 | 106685 | 106281 |
| 35 | RYJ | Imperial College Healthcare NHS Trust                  | London                   | 72424  | 67571  | 74510  | 75876  |
| 36 | RGQ | Ipswich Hospital NHS Trust                             | East of England          | 71307  | 71010  | 71234  | 71379  |
| 37 | R1F | Isle of wight NHS Trust                                | South Central            | .      | 31154  | 30292  | 28924  |
| 38 |     | James Paget University Hospitals NHS Foundation Trust  | East of England          | 46037  | 45337  | 44979  | 43863  |
| 39 | RGP |                                                        |                          |        |        |        |        |
| 40 |     | Kettering General Hospital NHS Foundation Trust        | East Midlands            | 68698  | 69630  | 68806  | 67436  |
| 41 | RNQ |                                                        |                          |        |        |        |        |
| 42 | RJZ | King's College Hospital NHS Foundation Trust           | London                   | 88602  | 86947  | 148099 | 150224 |
| 43 | RAX | Kingston Hospital NHS Trust                            | London                   | 75380  | 68716  | 69583  | 70421  |
| 44 | RXN | Lancashire Teaching Hospitals NHS Trust                | North West               | 87179  | 87630  | 88836  | 87841  |
| 45 | RR8 | Leeds Teaching Hospitals NHS Trust                     | Yorkshire and The Humber | 153920 | 148568 | 150597 | 151367 |
| 46 | RBQ | Liverpool Heart and Chest NHS Foundation Trust         | North West               | 106    | 20     | 47     | 64     |
| 47 | REP | Liverpool Womens Hospital NHS Trust                    | North West               | 1656   | 1833   | 3561   | 2475   |
| 48 |     | London North West Healthcare NHS Trust                 | London                   | .      | .      | 486    | 166660 |
| 49 | R1K |                                                        |                          |        |        |        |        |
| 50 |     | Luton and Dunstable Hospital NHS Foundation Trust      | East of England          | 96418  | 95475  | 95886  | 96289  |
| 51 | RC9 |                                                        |                          |        |        |        |        |
| 52 | RWF | Maidstone and Tunbridge Wells NHS Trust                | South East Coast         | 105941 | 102464 | 103455 | 104481 |
| 53 | RPA | Medway NHS Trust                                       | South East Coast         | 95192  | 94535  | 92696  | 92044  |
| 54 | RQ8 | Mid Essex Hospital Services NHS Trust                  | East of England          | 120888 | 107718 | 101410 | 100503 |
| 55 | RJD | Mid Staffordshire NHS Foundation Trust                 | West Midlands            | 51662  | 48065  | 47435  | 26235  |
| 56 |     |                                                        |                          |        |        |        |        |
| 57 |     |                                                        |                          |        |        |        |        |
| 58 |     |                                                        |                          |        |        |        |        |
| 59 |     |                                                        |                          |        |        |        |        |
| 60 |     |                                                        |                          |        |        |        |        |

1  
2  
3  
4  
5  
6  
7  
8  
9  
10  
11  
12  
13  
14  
15  
16  
17  
18  
19  
20  
21  
22  
23  
24  
25  
26  
27  
28  
29  
30  
31  
32  
33  
34  
35  
36  
37  
38  
39  
40  
41  
42  
43  
44  
45  
46  
47  
48  
49  
50  
51  
52  
53  
54  
55  
56  
57  
58  
59  
60

|     |                                                               |                          |        |        |        |        |
|-----|---------------------------------------------------------------|--------------------------|--------|--------|--------|--------|
| RXF | Mid Yorkshire Hospitals NHS Trust                             | Yorkshire and The Humber | 132650 | 133511 | 135039 | 133869 |
| RD8 | Milton Keynes Hospital NHS Foundation Trust                   | South Central            | 68637  | 69072  | 79382  | 68737  |
| RP6 | Moorfields Eye Hospital NHS Foundation Trust                  | London                   | 1824   | 916    | 916    | 843    |
| RTD | Newcastle Upon Tyne Hospitals NHS Foundation Trust            | North East               | 117233 | 117214 | 121658 | 124257 |
| RM1 | Norfolk and Norwich University Hospitals NHS Foundation Trust | East of England          | 116286 | 114535 | 114161 | 118394 |
| RVJ | North Bristol NHS Trust                                       | South West               | 49997  | 45687  | 48493  | 19435  |
| RNL | North Cumbria University Hospitals NHS Trust                  | North West               | 66588  | 66042  | 66633  | 66748  |
| RJL | North Lincolnshire and Goole Hosps NHS Foundation Trust       | Yorkshire and The Humber | 87840  | 89727  | 87901  | 87428  |
| RAP | North Middlesex University Hospital NHS Trust                 | London                   | 69610  | 59956  | 74570  | 96137  |
| RVW | North Tees and Hartlepool NHS Foundation Trust                | North East               | 62654  | 62927  | 61569  | 61068  |
| RV8 | North West London Hospitals NHS Trust                         | London                   | 124936 | 122553 | 120266 | .      |
| RNS | Northampton General Hospital NHS Trust                        | East Midlands            | 79616  | 79064  | 79996  | 80178  |
| RBZ | Northern Devon Healthcare NHS Trust                           | South West               | 36726  | 36767  | 35147  | 34821  |
| RTF | Northumbria Healthcare NHS Foundation Trust                   | North East               | 66237  | 66331  | 67151  | 65421  |
| RX1 | Nottingham University Hospitals NHS Trust                     | East Midlands            | 171690 | 169301 | 169578 | 172520 |
| RTH | Oxford Radcliffe Hospital NHS Trust                           | South Central            | 150782 | 149553 | 152788 | 153875 |
| RGM | Papworth Hospital NHS Foundation Trust                        | East of England          | 152    | 109    | 60     | 69     |
| RW6 | Pennine Acute Hospitals NHS Trust                             | North West               | 181461 | 177490 | 174316 | 172774 |
| RGN | Peterborough and Stamford Hospitals NHS Foundation Trust      | East of England          | 76073  | 78570  | 78495  | 79335  |
| RK9 | Plymouth Hospitals NHS Trust                                  | South West               | 94298  | 94886  | 93753  | 93846  |
| RD3 | Poole Hospital NHS Foundation Trust                           | South West               | 100557 | 97418  | 97080  | 97422  |
| RHU | Portsmouth Hospitals NHS Trust                                | South Central            | 126870 | 123691 | 124823 | 118416 |
| RQW | Princess Alexandra Hospital NHS Trust                         | East of England          | 65509  | 62257  | 62667  | 61910  |
| RCX | Queen Elizabeth Hospital Kings Lynn NHS Foundation Trust      | East of England          | 46079  | 45410  | 46035  | 44609  |
| RPC | Queen Victoria Hospital NHS Foundation Trust                  | South East Coast         | 30623  | 31677  | 32219  | 28764  |
| RL1 | Robert Jones and Agnes Hunt Orthopaedic NHS Trust             | West Midlands            | 386    | 179    | 68     | 93     |
| RHW | Royal Berkshire Hospital NHS Foundation Trust                 | South Central            | 107907 | 103139 | 101569 | 100771 |
| RMC | Royal Bolton Hospital NHS Foundation Trust                    | North West               | 82536  | 84113  | 84077  | 84314  |
| RDZ | Royal Bournemouth and Christchurch Trust                      | South West               | 5939   | 7681   | 5662   | 6007   |
| RT3 | Royal Brompton and Harefield NHS Foundation Trust             | London                   | 5283   | 4361   | 3825   | 3899   |
| REF | Royal Cornwall Hospitals NHS Trust                            | South West               | 94173  | 94210  | 91643  | 91698  |
| RH8 | Royal Devon and Exeter NHS Foundation Trust                   | South West               | 75572  | 76294  | 75519  | 78322  |
| RAL | Royal Free Hampstead NHS Trust                                | London                   | 52443  | 50068  | 48224  | 155113 |
| RQ6 | Royal Liverpool Broadgreen Hospitals NHS Trust                | North West               | 12435  | 11431  | 12377  | 12110  |
| RBB | Royal Nat Hosp Rheumatic Diseases NHS Trust                   | South West               | 24     | 24     | .      | .      |
| RRJ | Royal Orthopaedic Hospital NHS Foundation Trust               | West Midlands            | 343    | 209    | 293    | 405    |
| RA2 | Royal Surrey County NHS Foundation Trust                      | South East Coast         | 69295  | 69069  | 68703  | 67670  |
| RD1 | Royal United Hospital Bath NHS Trust                          | South West               | 91687  | 92969  | 93205  | 92029  |
| RL4 | Royal Wolverhampton Hospital NHS Trust                        | West Midlands            | 76825  | 76809  | 79145  | 79276  |
| RM3 | Salford Royal NHS Foundation Trust                            | North West               | 36907  | 36818  | 34678  | 34985  |
| RNZ | Salisbury NHS Foundation Trust                                | South West               | 53602  | 47693  | 47618  | 47659  |
| RXK | Sandwell and West Birmingham Hospitals NHS Trust              | West Midlands            | 94462  | 94120  | 98396  | 100183 |
| RCC | Scarborough and North East Yorkshire NHS Trust                | Yorkshire and The Humber | 35573  | .      | .      | .      |

|    |     |                                                |                          |        |        |        |        |
|----|-----|------------------------------------------------|--------------------------|--------|--------|--------|--------|
| 1  |     |                                                |                          |        |        |        |        |
| 2  |     |                                                |                          |        |        |        |        |
| 3  | RCU | Sheffield Children's NHS Foundation Trust      | Yorkshire and The Humber | 115371 | 116009 | 117548 | 102197 |
| 4  |     | Sheffield Teaching Hospitals NHS Foundation    |                          |        |        |        |        |
| 5  | RHQ | Trust                                          | Yorkshire and The Humber | 18502  | 18740  | 19406  | 27899  |
| 6  | RK5 | Sherwood Forest Hospitals NHS Foundation       | East Midlands            | 69176  | 70373  | 70109  | 70777  |
| 7  | RXW | Trust                                          |                          |        |        |        |        |
| 8  |     | Shrewsbury and Telford Hospital NHS Trust      | West Midlands            | 100221 | 101232 | 100641 | 102368 |
| 9  | RA9 | South Devon Health Care NHS Trust              | South West               | 49907  | 50574  | 50908  | 50569  |
| 10 | RYQ | South London Healthcare NHS Trust              | London                   | 139032 | 147968 | 39830  | .      |
| 11 | RTR | South Tees Hospitals NHS Foundation Trust      | North East               | 97604  | 97851  | 97981  | 98197  |
| 12 | RE9 | South Tyneside NHS Foundation Trust            | North East               | 25878  | 25367  | 24299  | 23625  |
| 13 | RJC | South Warwickshire NHS Foundation Trust        | West Midlands            | 46900  | 47121  | 47468  | 46629  |
| 14 | RHM | Southampton University Hospitals NHS Trust     | South Central            | 134343 | 115636 | 117210 | 120636 |
| 15 |     | Southend University Hospitals NHS Foundation   |                          |        |        |        |        |
| 16 | RAJ | Trust                                          | East of England          | 65574  | 66876  | 68295  | 66039  |
| 17 | RVY | Southport and Ormskirk Hospital NHS Trust      | North West               | 53815  | 53137  | 51841  | 53484  |
| 18 | RJ7 | St George's Healthcare NHS Trust               | London                   | 103559 | 109089 | 113127 | 118041 |
| 19 | RBN | St Helens and Knowsley Hospitals NHS Trust     | North West               | 61878  | 65500  | 65986  | 67966  |
| 20 | RWJ | Stockport NHS Foundation Trust                 | North West               | 66698  | 68799  | 65856  | 63583  |
| 21 | RTP | Surrey and Sussex Healthcare NHS Trust         | South East Coast         | 95076  | 92811  | 93180  | 83612  |
| 22 | RMP | Tameside Hospital NHS Foundation Trust         | North West               | 47340  | 48784  | 47877  | 48707  |
| 23 | RBA | Taunton and Somerset NHS Foundation Trust      | South West               | 67189  | 67320  | 66528  | 66116  |
| 24 |     | The Dudley Group Of Hospitals NHS Foundation   |                          |        |        |        |        |
| 25 | RNA | Trust                                          | West Midlands            | 82101  | 82900  | 80817  | 81498  |
| 26 | RAS | The Hillingdon Hospital NHS Trust              | London                   | 65107  | 61012  | 61198  | 65195  |
| 27 | RJ2 | The Lewisham Healthcare NHS Trust              | London                   | 62637  | 61055  | 103280 | 151669 |
| 28 | RBT | The Mid Cheshire Hospitals NHS Trust           | North West               | 57013  | 54683  | 57962  | 56699  |
| 29 | RFR | The Rotherham NHS Foundation Trust             | Yorkshire and The Humber | 53392  | 51784  | 50347  | 52577  |
| 30 | RPY | The Royal Marsden NHS Foundation Trust         | London                   | 382    | 216    | 348    | 104    |
| 31 |     | The Royal National Orthopaedic Hospital NHS    |                          |        |        |        |        |
| 32 | RAN | Trust                                          | London                   | 973    | 529    | 289    | 409    |
| 33 | RET | The Walton Centre NHS Foundation Trust         | North West               | 440    | 263    | 255    | 281    |
| 34 | RWD | United Lincolnshire Hospitals NHS Trust        | East Midlands            | 118708 | 115559 | 115924 | 112401 |
| 35 |     | University College London Hospitals NHS        |                          |        |        |        |        |
| 36 | RRV | Foundation Trust                               | London                   | 52193  | 39854  | 42780  | 42106  |
| 37 | RRK | University Hospital Birmingham NHS Foundation  | West Midlands            | 11362  | 10510  | 12108  | 10979  |
| 38 |     | Trust                                          |                          |        |        |        |        |
| 39 | RJE | University Hospital Of North Staffordshire     | West Midlands            | 107959 | 108300 | 110705 | 127581 |
| 40 |     | Hospital NHS Trust                             |                          |        |        |        |        |
| 41 | RM2 | University Hospital Of South Manchester NHS    | North West               | 70604  | 70443  | 70896  | 71403  |
| 42 |     | Foundation Trust                               |                          |        |        |        |        |
| 43 | RKB | University Hospitals Coventry and Warwickshire | West Midlands            | 116634 | 116159 | 126521 | 126537 |
| 44 |     | NHS Trust                                      |                          |        |        |        |        |
| 45 | RA7 | University Hospitals Of Bristol NHS Foundation | South West               | 145749 | 145288 | 145188 | 172827 |
| 46 |     | Trust                                          |                          |        |        |        |        |
| 47 | RWE | University Hospitals Of Leicester NHS Trust    | East Midlands            | 188490 | 188424 | 189865 | 192382 |
| 48 |     | University Hospitals Of Morecambe Bay NHS      |                          |        |        |        |        |
| 49 | RTX | Foundation Trust                               | North West               | 69612  | 68370  | 67995  | 68522  |
| 50 | RBK | Walsall Hospitals NHS Trust                    | West Midlands            | 56799  | 58354  | 56452  | 55821  |
| 51 | RWW | Warrington and Halton Hospitals NHS            | North West               | 64831  | 63822  | 61770  | 61421  |
| 52 |     | Foundation Trust                               |                          |        |        |        |        |
| 53 | RWG | West Hertfordshire Hospitals NHS Trust         | East of England          | 91480  | 91916  | 97486  | 95384  |
| 54 | RFW | West Middlesex University NHS Trust            | London                   | 59734  | 65428  | 67430  | 63584  |
| 55 | RGR | West Suffolk Hospital NHS Trust                | East of England          | 57097  | 58326  | 57180  | 56939  |
| 56 | RYR | Western Sussex Hospitals NHS Trust             | South East Coast         | 96626  | 94666  | 91769  | 94045  |
| 57 | RA3 | Weston Area Health NHS Trust                   | South West               | 13122  | 11742  | 12538  | 13040  |
| 58 |     |                                                |                          |        |        |        |        |
| 59 |     |                                                |                          |        |        |        |        |
| 60 |     |                                                |                          |        |        |        |        |

|    |     |                                               |                          |        |        |        |        |
|----|-----|-----------------------------------------------|--------------------------|--------|--------|--------|--------|
| 1  |     |                                               |                          |        |        |        |        |
| 2  |     |                                               |                          |        |        |        |        |
| 3  | RKE | Whittington Hospital NHS Trust                | London                   | 53355  | 50811  | 51311  | 50647  |
| 4  |     | Wirral University Teaching Hospital NHS       |                          |        |        |        |        |
| 5  | RBL | Foundation Trust                              | North West               | 71996  | 72292  | 72743  | 72140  |
| 6  | RWP | Worcestershire Acute Hospitals NHS Trust      | West Midlands            | 120307 | 118484 | 117303 | 115581 |
| 7  |     | Wrightington, Wigan and Leigh NHS Foundation  |                          |        |        |        |        |
| 8  | RRF | Trust                                         | North West               | 52988  | 53106  | 52291  | 51486  |
| 9  | RA4 | Yeovil District Hospital NHS Foundation Trust | South West               | 37273  | 38748  | 37598  | 35923  |
| 10 | RCB | York Hospitals NHS Trust                      | Yorkshire and The Humber | 70501  | 105737 | 103237 | 104298 |
| 11 |     |                                               |                          |        |        |        |        |
| 12 |     |                                               |                          |        |        |        |        |
| 13 |     |                                               |                          |        |        |        |        |
| 14 |     |                                               |                          |        |        |        |        |
| 15 |     |                                               |                          |        |        |        |        |
| 16 |     |                                               |                          |        |        |        |        |
| 17 |     |                                               |                          |        |        |        |        |
| 18 |     |                                               |                          |        |        |        |        |
| 19 |     |                                               |                          |        |        |        |        |
| 20 |     |                                               |                          |        |        |        |        |
| 21 |     |                                               |                          |        |        |        |        |
| 22 |     |                                               |                          |        |        |        |        |
| 23 |     |                                               |                          |        |        |        |        |
| 24 |     |                                               |                          |        |        |        |        |
| 25 |     |                                               |                          |        |        |        |        |
| 26 |     |                                               |                          |        |        |        |        |
| 27 |     |                                               |                          |        |        |        |        |
| 28 |     |                                               |                          |        |        |        |        |
| 29 |     |                                               |                          |        |        |        |        |
| 30 |     |                                               |                          |        |        |        |        |
| 31 |     |                                               |                          |        |        |        |        |
| 32 |     |                                               |                          |        |        |        |        |
| 33 |     |                                               |                          |        |        |        |        |
| 34 |     |                                               |                          |        |        |        |        |
| 35 |     |                                               |                          |        |        |        |        |
| 36 |     |                                               |                          |        |        |        |        |
| 37 |     |                                               |                          |        |        |        |        |
| 38 |     |                                               |                          |        |        |        |        |
| 39 |     |                                               |                          |        |        |        |        |
| 40 |     |                                               |                          |        |        |        |        |
| 41 |     |                                               |                          |        |        |        |        |
| 42 |     |                                               |                          |        |        |        |        |
| 43 |     |                                               |                          |        |        |        |        |
| 44 |     |                                               |                          |        |        |        |        |
| 45 |     |                                               |                          |        |        |        |        |
| 46 |     |                                               |                          |        |        |        |        |
| 47 |     |                                               |                          |        |        |        |        |
| 48 |     |                                               |                          |        |        |        |        |
| 49 |     |                                               |                          |        |        |        |        |
| 50 |     |                                               |                          |        |        |        |        |
| 51 |     |                                               |                          |        |        |        |        |
| 52 |     |                                               |                          |        |        |        |        |
| 53 |     |                                               |                          |        |        |        |        |
| 54 |     |                                               |                          |        |        |        |        |
| 55 |     |                                               |                          |        |        |        |        |
| 56 |     |                                               |                          |        |        |        |        |
| 57 |     |                                               |                          |        |        |        |        |
| 58 |     |                                               |                          |        |        |        |        |
| 59 |     |                                               |                          |        |        |        |        |
| 60 |     |                                               |                          |        |        |        |        |

## Appendix Table A2

Paediatric hospital catchment populations by Trust, deprivation quintile,  
English Hospital Episode Statistics, 2013/14

| Trust code | Trust name                                                      | Catchment pop by Index of Multiple Deprivation quintile |       |       |       |       | Total  | % in most deprived quintile | % in least deprived quintile |
|------------|-----------------------------------------------------------------|---------------------------------------------------------|-------|-------|-------|-------|--------|-----------------------------|------------------------------|
|            |                                                                 | 1 (Most deprived)                                       | 2     | 3     | 4     | 5     |        |                             |                              |
| REM        | Aintree University Hospitals NHS Foundation Trust               | 4330                                                    | 1126  | 1903  | 891   | 381   | 8631   | 50.2%                       | 4.4%                         |
| RCF        | Airedale NHS Foundation Trust                                   | 9488                                                    | 5421  | 8214  | 12856 | 7989  | 43968  | 21.6%                       | 18.2%                        |
| RBS        | Alder Hey Childrens NHS Foundation Trust                        | 78577                                                   | 18715 | 17336 | 12477 | 8121  | 135226 | 58.1%                       | 6.0%                         |
| RTK        | Ashford and St Peter's Hospitals NHS Foundation Trust           | 803                                                     | 6579  | 10863 | 14707 | 34762 | 67714  | 1.2%                        | 51.3%                        |
| RF4        | Barking, Havering and Redbridge University Hospitals NHS Trust  | 35894                                                   | 49190 | 31992 | 20717 | 11341 | 149133 | 24.1%                       | 7.6%                         |
| RVL        | Barnet and Chase Farm Hospitals NHS Trust                       | 13252                                                   | 24820 | 31417 | 28228 | 15377 | 113094 | 11.7%                       | 13.6%                        |
| RFF        | Barnsley Dist Gen Hosp NHS Foundation Trust                     | 16847                                                   | 14899 | 9311  | 6467  | 3641  | 51165  | 32.9%                       | 7.1%                         |
| R1H        | Barts Health NHS Trust                                          | 163144                                                  | 60604 | 24847 | 13148 | 8500  | 270243 | 60.4%                       | 3.1%                         |
| RDD        | Basildon and Thurrock University Hospitals NHS Foundation Trust | 14521                                                   | 20050 | 13825 | 11279 | 16300 | 75975  | 19.1%                       | 21.5%                        |
| RN5        | Basingstoke and North Hampshire Hospitals NHS Foundation Trust  | 818                                                     | 13145 | 13577 | 20675 | 53220 | 101435 | 0.8%                        | 52.5%                        |
| RC1        | Bedford Hospital NHS Trust                                      | 3233                                                    | 5913  | 5603  | 7476  | 10060 | 32284  | 10.0%                       | 31.2%                        |
| RQ3        | Birmingham Children's Hospital NHS Foundation Trust             | 91604                                                   | 28586 | 25106 | 9722  | 7055  | 162074 | 56.5%                       | 4.4%                         |
| RR1        | Birmingham Heartlands and Solihull Trust                        | 82911                                                   | 22330 | 23792 | 21020 | 23566 | 173618 | 47.8%                       | 13.6%                        |
| RLU        | Birmingham Women's NHS Foundation Trust                         | 1146                                                    | 576   | 459   | 271   | 74    | 2526   | 45.4%                       | 2.9%                         |
| RXL        | Blackpool Fylde and Wyre NHS Foundation Trust                   | 19392                                                   | 11532 | 11532 | 9706  | 7400  | 59561  | 32.6%                       | 12.4%                        |
| RAE        | Bradford Teaching Hospitals NHS Foundation Trust                | 66484                                                   | 20131 | 13399 | 6629  | 4650  | 111292 | 59.7%                       | 4.2%                         |
| RXH        | Brighton and Sussex University Hospitals NHS Trust              | 12242                                                   | 21734 | 24955 | 22064 | 22751 | 103746 | 11.8%                       | 21.9%                        |
| RXQ        | Buckinghamshire Healthcare NHS Trust                            | 375                                                     | 15533 | 13666 | 16674 | 49949 | 96197  | 0.4%                        | 51.9%                        |
| RJF        | Burton Hospitals NHS Foundation Trust                           | 8028                                                    | 10883 | 13795 | 16333 | 12992 | 62031  | 12.9%                       | 20.9%                        |
| RWY        | Calderdale and Huddersfield NHS Foundation Trust                | 26028                                                   | 23462 | 15310 | 19005 | 12625 | 96430  | 27.0%                       | 13.1%                        |
| RGT        | Cambridge University Hospitals NHS Foundation Trust             | 1607                                                    | 10992 | 14338 | 25244 | 42414 | 94595  | 1.7%                        | 44.8%                        |
| RYV        | Cambridgeshire Community Services NHS Trust                     | 302                                                     | 4165  | 10028 | 7652  | 16328 | 38476  | 0.8%                        | 42.4%                        |
| RW3        | Central Manchester University Hospitals NHS Foundation Trust    | 67086                                                   | 27353 | 16708 | 11774 | 8406  | 131327 | 51.1%                       | 6.4%                         |
| RQM        | Chelsea and Westminster Hospital NHS Foundation Trust           | 16640                                                   | 26815 | 19308 | 19858 | 6244  | 88865  | 18.7%                       | 7.0%                         |
| RFS        | Chesterfield Royal Hospital NHS Foundation Trust                | 11262                                                   | 14747 | 10348 | 11926 | 7507  | 55790  | 20.2%                       | 13.5%                        |

1  
2  
3  
4  
5  
6  
7  
8  
9  
10  
11  
12  
13  
14  
15  
16  
17  
18  
19  
20  
21  
22  
23  
24  
25  
26  
27  
28  
29  
30  
31  
32  
33  
34  
35  
36  
37  
38  
39  
40  
41  
42  
43  
44  
45  
46  
47  
48  
49  
50  
51  
52  
53  
54  
55  
56  
57  
58  
59  
60

|     |                                                        |       |       |       |       |       |        |       |       |
|-----|--------------------------------------------------------|-------|-------|-------|-------|-------|--------|-------|-------|
| RBV | Christie Hospital NHS Trust                            | 86    | 50    | 0     | 27    | 39    | 202    | 42.5% | 19.5% |
| RLN | City Hospitals Sunderland NHS Foundation Trust         | 26687 | 18178 | 8391  | 7604  | 2691  | 63551  | 42.0% | 4.2%  |
| RDE | Colchester Hospital University NHS Foundation Trust    | 7259  | 16058 | 17471 | 21094 | 12753 | 74634  | 9.7%  | 17.1% |
| RJR | Countess Of Chester Hospital NHS Foundation Trust      | 9307  | 3990  | 5177  | 9655  | 14849 | 42978  | 21.7% | 34.6% |
| RXP | County Durham and Darlington NHS Foundation Trust      | 31670 | 30286 | 17175 | 15061 | 12927 | 107119 | 29.6% | 12.1% |
| RJ6 | Croydon Health Services NHS Trust                      | 17433 | 28190 | 18334 | 9300  | 4833  | 78090  | 22.3% | 6.2%  |
| RN7 | Dartford and Gravesham NHS Trust                       | 9887  | 18819 | 16535 | 18000 | 15283 | 78523  | 12.6% | 19.5% |
| RTG | Derby Hospitals NHS Foundation Trust                   | 22327 | 19085 | 20936 | 18375 | 24044 | 104768 | 21.3% | 23.0% |
| RP5 | Doncaster and Bassetlaw Hospitals NHS Foundation Trust | 37755 | 22141 | 18484 | 16150 | 3949  | 98480  | 38.3% | 4.0%  |
| RBD | Dorset County Hospital NHS Foundation Trust            | 3473  | 6672  | 15169 | 10100 | 4054  | 39469  | 8.8%  | 10.3% |
| RC3 | Ealing Hospital NHS Trust                              | 13677 | 19798 | 14306 | 3900  | 1139  | 52820  | 25.9% | 2.2%  |
| RWH | East and North Hertfordshire NHS Trust                 | 1696  | 12240 | 25595 | 24728 | 42525 | 106784 | 1.6%  | 39.8% |
| RJN | East Cheshire NHS Trust                                | 1827  | 4965  | 6152  | 6945  | 16141 | 36029  | 5.1%  | 44.8% |
| RVV | East Kent Hospitals University NHS Foundation Trust    | 26345 | 30829 | 35972 | 34287 | 10948 | 138382 | 19.0% | 7.9%  |
| RXR | East Lancashire Hospitals NHS Trust                    | 54726 | 24499 | 11565 | 19053 | 8398  | 118240 | 46.3% | 7.1%  |
| RXC | East Sussex Hospitals NHS Trust                        | 15541 | 20009 | 16409 | 14715 | 7152  | 73828  | 21.1% | 9.7%  |
| RVR | Epsom and St Helier University Hospitals NHS Trust     | 2557  | 14032 | 13354 | 18218 | 33002 | 81162  | 3.1%  | 40.7% |
| RDU | Frimley Park Hospital NHS Trust                        | 826   | 5337  | 11567 | 16677 | 54189 | 88597  | 0.9%  | 61.2% |
| RR7 | Gateshead Health NHS Foundation Trust                  | 15875 | 10622 | 4335  | 5199  | 2210  | 38241  | 41.5% | 5.8%  |
| RLT | George Eliot Hospital NHS Trust                        | 3223  | 6192  | 4042  | 4183  | 2931  | 20570  | 15.7% | 14.2% |
| RTE | Gloucestershire Hospitals NHS Foundation Trust         | 10586 | 14006 | 26234 | 31926 | 37706 | 120459 | 8.8%  | 31.3% |
| RP4 | Great Ormond Street Hospital NHS Trust                 | 2151  | 1616  | 1447  | 1269  | 973   | 7456   | 28.8% | 13.1% |
| RN3 | Great Western Hospitals NHS Foundation Trust           | 8184  | 7123  | 12779 | 22039 | 29222 | 79347  | 10.3% | 36.8% |
| RJ1 | Guy's and St Thomas' NHS Foundation Trust              | 23701 | 29293 | 8915  | 6087  | 3576  | 71571  | 33.1% | 5.0%  |
| RCD | Harrogate and District NHS Foundation Trust            | 492   | 1933  | 7081  | 12804 | 17836 | 40145  | 1.2%  | 44.4% |
| RD7 | Heatherwood and Wexham Park Hosps NHS Foundation Trust | 6085  | 21541 | 23192 | 17741 | 32269 | 100829 | 6.0%  | 32.0% |
| RLQ | Hereford Hospitals NHS Trust                           | 2934  | 4454  | 20545 | 7986  | 2228  | 38147  | 7.7%  | 5.8%  |
| RQQ | Hinchingbrooke Healthcare NHS Trust                    | 12    | 733   | 1351  | 1341  | 3375  | 6811   | 0.2%  | 49.5% |
| RQX | Homerton University Hospital NHS Foundation Trust      | 40697 | 10604 | 673   | 402   | 202   | 52578  | 77.4% | 0.4%  |
| RWA | Hull and East Yorkshire Hospitals NHS Trust            | 35876 | 15750 | 16931 | 18324 | 19804 | 106685 | 33.6% | 18.6% |
| RYJ | Imperial College Healthcare NHS Trust                  | 29567 | 23341 | 11461 | 8231  | 1911  | 74510  | 39.7% | 2.6%  |
| RGQ | Ipswich Hospital NHS Trust                             | 8613  | 8943  | 14027 | 21209 | 18443 | 71234  | 12.1% | 25.9% |
| R1F | Isle of wight NHS Trust                                | 1970  | 10358 | 10936 | 4519  | 2509  | 30292  | 6.5%  | 8.3%  |
| RGP | James Paget University Hospitals NHS Foundation Trust  | 10958 | 10713 | 11872 | 9138  | 2299  | 44979  | 24.4% | 5.1%  |
| RNQ | Kettering General Hospital NHS Foundation Trust        | 11303 | 15898 | 11852 | 12521 | 17233 | 68806  | 16.4% | 25.0% |
| RJZ | King's College Hospital NHS Foundation Trust           | 42747 | 43266 | 19382 | 20404 | 22300 | 148099 | 28.9% | 15.1% |
| RAX | Kingston Hospital NHS Trust                            | 1675  | 5276  | 10568 | 21191 | 30872 | 69583  | 2.4%  | 44.4% |
| RXN | Lancashire Teaching Hospitals NHS Trust                | 21400 | 14101 | 15110 | 18870 | 19355 | 88836  | 24.1% | 21.8% |
| RR8 | Leeds Teaching Hospitals NHS Trust                     | 59934 | 28280 | 20340 | 22620 | 19424 | 150597 | 39.8% | 12.9% |
| RBQ | Liverpool Heart and Chest NHS                          | 0     | 0     | 26    | 22    | 0     | 47     | 0.0%  | 0.0%  |



1  
2  
3  
4  
5  
6  
7  
8  
9  
10  
11  
12  
13  
14  
15  
16  
17  
18  
19  
20  
21  
22  
23  
24  
25  
26  
27  
28  
29  
30  
31  
32  
33  
34  
35  
36  
37  
38  
39  
40  
41  
42  
43  
44  
45  
46  
47  
48  
49  
50  
51  
52  
53  
54  
55  
56  
57  
58  
59  
60

## Foundation Trust

|     |                                                               |       |       |       |       |       |        |       |       |
|-----|---------------------------------------------------------------|-------|-------|-------|-------|-------|--------|-------|-------|
| REP | Liverpool Womens Hospital NHS Trust                           | 1707  | 707   | 509   | 394   | 244   | 3561   | 48.0% | 6.9%  |
| R1K | London North West Healthcare NHS Trust                        | 97    | 173   | 141   | 45    | 30    | 486    | 19.9% | 6.2%  |
| RC9 | Luton and Dunstable Hospital NHS Foundation Trust             | 17852 | 24434 | 18167 | 14159 | 21275 | 95886  | 18.6% | 22.2% |
| RWF | Maidstone and Tunbridge Wells NHS Trust                       | 2895  | 8897  | 19271 | 33793 | 38600 | 103455 | 2.8%  | 37.3% |
| RPA | Medway NHS Trust                                              | 16699 | 28561 | 18476 | 15552 | 13409 | 92696  | 18.0% | 14.5% |
| RQ8 | Mid Essex Hospital Services NHS Trust                         | 6685  | 14336 | 16855 | 29032 | 34503 | 101410 | 6.6%  | 34.0% |
| RJD | Mid Staffordshire NHS Foundation Trust                        | 5032  | 9810  | 9988  | 11328 | 11277 | 47435  | 10.6% | 23.8% |
| RXF | Mid Yorkshire Hospitals NHS Trust                             | 43148 | 38161 | 23923 | 20426 | 9381  | 135040 | 32.0% | 6.9%  |
| RD8 | Milton Keynes Hospital NHS Foundation Trust                   | 10991 | 9702  | 10242 | 20047 | 28400 | 79382  | 13.8% | 35.8% |
| RP6 | Moorfields Eye Hospital NHS Foundation Trust                  | 127   | 307   | 164   | 197   | 122   | 916    | 13.8% | 13.3% |
| RTD | Newcastle Upon Tyne Hospitals NHS Foundation Trust            | 40798 | 25120 | 18285 | 17807 | 19648 | 121658 | 33.5% | 16.2% |
| RM1 | Norfolk and Norwich University Hospitals NHS Foundation Trust | 9602  | 17400 | 32943 | 30205 | 24011 | 114161 | 8.4%  | 21.0% |
| RVJ | North Bristol NHS Trust                                       | 5764  | 8515  | 9992  | 9720  | 14502 | 48493  | 11.9% | 29.9% |
| RNL | North Cumbria University Hospitals NHS Trust                  | 12195 | 15376 | 17853 | 13491 | 7719  | 66633  | 18.3% | 11.6% |
| RJL | North Lincolnshire and Goole Hosps NHS Foundation Trust       | 27606 | 16268 | 17235 | 18122 | 8671  | 87901  | 31.4% | 9.9%  |
| RAP | North Middlesex University Hospital NHS Trust                 | 44361 | 20500 | 5193  | 3151  | 1365  | 74570  | 59.5% | 1.8%  |
| RVW | North Tees and Hartlepool NHS Foundation Trust                | 26629 | 10795 | 8422  | 6195  | 9527  | 61569  | 43.3% | 15.5% |
| RV8 | North West London Hospitals NHS Trust                         | 16283 | 39133 | 36738 | 17588 | 10523 | 120266 | 13.5% | 8.7%  |
| RNS | Northampton General Hospital NHS Trust                        | 13830 | 14358 | 12007 | 14485 | 25316 | 79996  | 17.3% | 31.6% |
| RBZ | Northern Devon Healthcare NHS Trust                           | 2620  | 10607 | 13149 | 7557  | 1214  | 35147  | 7.5%  | 3.5%  |
| RTF | Northumbria Healthcare NHS Foundation Trust                   | 17976 | 17426 | 10150 | 9092  | 12507 | 67151  | 26.8% | 18.6% |
| RX1 | Nottingham University Hospitals NHS Trust                     | 46374 | 32241 | 27468 | 27039 | 36456 | 169578 | 27.3% | 21.5% |
| RTH | Oxford Radcliffe Hospital NHS Trust                           | 9278  | 14348 | 26218 | 36663 | 66280 | 152788 | 6.1%  | 43.4% |
| RGM | Papworth Hospital NHS Foundation Trust                        | .     | 26    | 9     | 25    | 0     | 60     | .     | 0.0%  |
| RW6 | Pennine Acute Hospitals NHS Trust                             | 88802 | 32682 | 23049 | 19382 | 10401 | 174316 | 50.9% | 6.0%  |
| RGN | Peterborough and Stamford Hospitals NHS Foundation Trust      | 18004 | 12188 | 13929 | 18527 | 15847 | 78495  | 22.9% | 20.2% |
| RK9 | Plymouth Hospitals NHS Trust                                  | 16869 | 22361 | 23327 | 22143 | 9054  | 93753  | 18.0% | 9.7%  |
| RD3 | Poole Hospital NHS Foundation Trust                           | 7818  | 19911 | 24083 | 21328 | 23941 | 97080  | 8.1%  | 24.7% |
| RHU | Portsmouth Hospitals NHS Trust                                | 23318 | 22744 | 22627 | 27470 | 28665 | 124823 | 18.7% | 23.0% |
| RQW | Princess Alexandra Hospital NHS Trust                         | 2053  | 16719 | 10267 | 13604 | 20024 | 62667  | 3.3%  | 32.0% |
| RCX | Queen Elizabeth Hospital Kings Lynn NHS Foundation Trust      | 6726  | 15266 | 15078 | 5765  | 3199  | 46035  | 14.6% | 6.9%  |
| RPC | Queen Victoria Hospital NHS Foundation Trust                  | 2846  | 4759  | 6532  | 8203  | 9878  | 32219  | 8.8%  | 30.7% |
| RL1 | Robert Jones and Agnes Hunt Orthopaedic NHS Trust             | .     | .     | 68    | 0     | 0     | 68     | .     | 0.0%  |
| RHW | Royal Berkshire Hospital NHS Foundation Trust                 | 5565  | 12862 | 13701 | 18695 | 50746 | 101569 | 5.5%  | 50.0% |
| RMC | Royal Bolton Hospital NHS Foundation Trust                    | 37825 | 16742 | 11573 | 9984  | 7953  | 84077  | 45.0% | 9.5%  |
| RDZ | Royal Bournemouth and Christchurch Trust                      | 552   | 1221  | 1091  | 1222  | 1577  | 5662   | 9.7%  | 27.9% |
| RT3 | Royal Brompton and Harefield NHS Foundation Trust             | 627   | 863   | 727   | 783   | 825   | 3825   | 16.4% | 21.6% |
| REF | Royal Cornwall Hospitals NHS Trust                            | 11834 | 35049 | 31587 | 10025 | 3147  | 91643  | 12.9% | 3.4%  |

|     |                                                          |       |       |       |       |       |        |       |         |
|-----|----------------------------------------------------------|-------|-------|-------|-------|-------|--------|-------|---------|
| RH8 | Royal Devon and Exeter NHS Foundation Trust              | 5002  | 14847 | 25290 | 21990 | 8391  | 75519  | 6.6%  | 11.1%   |
| RAL | Royal Free Hampstead NHS Trust                           | 7307  | 12331 | 11797 | 13302 | 3487  | 48224  | 15.2% | 7.2%    |
| RQ6 | Royal Liverpool Broadgreen Hospitals NHS Trust           | 7758  | 1640  | 1285  | 1043  | 651   | 12377  | 62.7% | 5.3%    |
| RRJ | Royal Orthopaedic Hospital NHS Foundation Trust          | 165   | 20    | 46    | 61    | .     | 293    | 56.5% | #VALUE! |
| RA2 | Royal Surrey County NHS Foundation Trust                 | 130   | 3177  | 7736  | 16241 | 41419 | 68703  | 0.2%  | 60.3%   |
| RD1 | Royal United Hospital Bath NHS Trust                     | 3564  | 10934 | 20295 | 24708 | 33703 | 93205  | 3.8%  | 36.2%   |
| RL4 | Royal Wolverhampton Hospital NHS Trust                   | 38204 | 14598 | 10037 | 9724  | 6583  | 79145  | 48.3% | 8.3%    |
| RM3 | Salford Royal NHS Foundation Trust                       | 14387 | 8964  | 5303  | 3709  | 2317  | 34678  | 41.5% | 6.7%    |
| RNZ | Salisbury NHS Foundation Trust                           | 1844  | 2912  | 12705 | 15200 | 14957 | 47618  | 3.9%  | 31.4%   |
| RXK | Sandwell and West Birmingham Hospitals NHS Trust         | 63925 | 19339 | 10871 | 2795  | 1467  | 98396  | 65.0% | 1.5%    |
| RCU | Sheffield Children's NHS Foundation Trust                | 47093 | 18165 | 18857 | 16951 | 16482 | 117548 | 40.1% | 14.0%   |
| RHQ | Sheffield Teaching Hospitals NHS Foundation Trust        | 7293  | 3134  | 2764  | 2585  | 3630  | 19406  | 37.6% | 18.7%   |
| RK5 | Sherwood Forest Hospitals NHS Foundation Trust           | 22234 | 19767 | 13387 | 10059 | 4664  | 70109  | 31.7% | 6.7%    |
| RXW | Shrewsbury and Telford Hospital NHS Trust                | 13908 | 23151 | 27882 | 21270 | 14428 | 100641 | 13.8% | 14.3%   |
| RA9 | South Devon Health Care NHS Trust                        | 6256  | 14054 | 17329 | 10014 | 3256  | 50908  | 12.3% | 6.4%    |
| RYQ | South London Healthcare NHS Trust                        | 15076 | 12342 | 5257  | 3938  | 3217  | 39830  | 37.8% | 8.1%    |
| RTR | South Tees Hospitals NHS Foundation Trust                | 35008 | 14193 | 11757 | 21000 | 16022 | 97981  | 35.7% | 16.4%   |
| RE9 | South Tyneside NHS Foundation Trust                      | 10715 | 5681  | 3984  | 1815  | 2105  | 24299  | 44.1% | 8.7%    |
| RJC | South Warwickshire NHS Foundation Trust                  | 614   | 4058  | 7501  | 14302 | 20994 | 47468  | 1.3%  | 44.2%   |
| RHM | Southampton University Hospitals NHS Trust               | 17134 | 19498 | 23922 | 23325 | 33332 | 117210 | 14.6% | 28.4%   |
| RAJ | Southend University Hospitals NHS Foundation Trust       | 10337 | 13071 | 12891 | 13934 | 18062 | 68295  | 15.1% | 26.4%   |
| RVY | Southport and Ormskirk Hospital NHS Trust                | 9752  | 9350  | 11853 | 12368 | 8518  | 51841  | 18.8% | 16.4%   |
| RJ7 | St George's Healthcare NHS Trust                         | 10665 | 35308 | 27079 | 18100 | 21974 | 113127 | 9.4%  | 19.4%   |
| RBN | St Helens and Knowsley Hospitals NHS Trust               | 31345 | 11877 | 10356 | 6307  | 6100  | 65986  | 47.5% | 9.2%    |
| RWJ | Stockport NHS Foundation Trust                           | 9769  | 12674 | 13387 | 13047 | 16979 | 65856  | 14.8% | 25.8%   |
| RTP | Surrey and Sussex Healthcare NHS Trust                   | 1107  | 9346  | 21853 | 22473 | 38401 | 93180  | 1.2%  | 41.2%   |
| RMP | Tameside Hospital NHS Foundation Trust                   | 18817 | 12474 | 7684  | 5939  | 2963  | 47877  | 39.3% | 6.2%    |
| RBA | Taunton and Somerset NHS Foundation Trust                | 3979  | 15818 | 20692 | 15615 | 10424 | 66528  | 6.0%  | 15.7%   |
| RNA | The Dudley Group Of Hospitals NHS Foundation Trust       | 26610 | 20047 | 10763 | 12208 | 11188 | 80817  | 32.9% | 13.8%   |
| RAS | The Hillingdon Hospital NHS Trust                        | 7023  | 25504 | 15414 | 8142  | 5115  | 61198  | 11.5% | 8.4%    |
| RJ2 | The Lewisham Healthcare NHS Trust                        | 38471 | 37675 | 14761 | 7280  | 5094  | 103280 | 37.2% | 4.9%    |
| RBT | The Mid Cheshire Hospitals NHS Trust                     | 9058  | 10142 | 9194  | 10396 | 19172 | 57962  | 15.6% | 33.1%   |
| RFR | The Rotherham NHS Foundation Trust                       | 20623 | 13100 | 7143  | 7545  | 1935  | 50347  | 41.0% | 3.8%    |
| RPY | The Royal Marsden NHS Foundation Trust                   | 0     | 107   | 53    | 42    | 147   | 348    | 0.0%  | 42.1%   |
| RAN | The Royal National Orthopaedic Hospital NHS Trust        | 42    | 52    | 50    | 117   | 28    | 289    | 14.5% | 9.7%    |
| RET | The Walton Centre NHS Foundation Trust                   | 83    | 36    | 50    | 56    | 31    | 255    | 32.7% | 12.1%   |
| RWD | United Lincolnshire Hospitals NHS Trust                  | 18063 | 25037 | 28269 | 25315 | 19240 | 115924 | 15.6% | 16.6%   |
| RRV | University College London Hospitals NHS Foundation Trust | 16229 | 15333 | 5927  | 3409  | 1882  | 42780  | 37.9% | 4.4%    |
| RRK | University Hospital Birmingham NHS Foundation Trust      | 5027  | 2439  | 2473  | 1089  | 1079  | 12108  | 41.5% | 8.9%    |

1  
2  
3  
4  
5  
6  
7  
8  
9  
10  
11  
12  
13  
14  
15  
16  
17  
18  
19  
20  
21  
22  
23  
24  
25  
26  
27  
28  
29  
30  
31  
32  
33  
34  
35  
36  
37  
38  
39  
40  
41  
42  
43  
44  
45  
46  
47  
48  
49  
50  
51  
52  
53  
54  
55  
56  
57  
58  
59  
60

|     |                                                                  |       |       |       |       |       |        |       |       |
|-----|------------------------------------------------------------------|-------|-------|-------|-------|-------|--------|-------|-------|
| RJE | University Hospital Of North<br>Staffordshire Hospital NHS Trust | 39874 | 20414 | 19693 | 20464 | 10260 | 110705 | 36.0% | 9.3%  |
| RM2 | University Hospital Of South<br>Manchester NHS Foundation Trust  | 21407 | 9078  | 9600  | 13012 | 17798 | 70896  | 30.2% | 25.1% |
| RKB | University Hospitals Coventry and<br>Warwickshire NHS Trust      | 31965 | 29721 | 24664 | 22049 | 18122 | 126521 | 25.3% | 14.3% |
| RA7 | University Hospitals Of Bristol NHS<br>Foundation Trust          | 26346 | 29029 | 24462 | 28807 | 36544 | 145188 | 18.1% | 25.2% |
| RWE | University Hospitals Of Leicester NHS<br>Trust                   | 39869 | 40317 | 28191 | 33490 | 47997 | 189865 | 21.0% | 25.3% |
| RTX | University Hospitals Of Morecambe<br>Bay NHS Foundation Trust    | 13063 | 11495 | 15298 | 18906 | 9232  | 67995  | 19.2% | 13.6% |
| RBK | Walsall Hospitals NHS Trust                                      | 29584 | 12247 | 5952  | 4564  | 4104  | 56452  | 52.4% | 7.3%  |
| RWW | Warrington and Halton Hospitals NHS<br>Foundation Trust          | 18402 | 9610  | 6976  | 12122 | 14661 | 61770  | 29.8% | 23.7% |
| RWG | West Hertfordshire Hospitals NHS<br>Trust                        | 909   | 13213 | 22267 | 19887 | 41210 | 97486  | 0.9%  | 42.3% |
| RFW | West Middlesex University NHS Trust                              | 5688  | 22475 | 16883 | 13284 | 9100  | 67430  | 8.4%  | 13.5% |
| RGR | West Suffolk Hospital NHS Trust                                  | 1041  | 8425  | 12183 | 24686 | 10844 | 57180  | 1.8%  | 19.0% |
| RYR | Western Sussex Hospitals NHS Trust                               | 6118  | 15486 | 30143 | 22225 | 17797 | 91769  | 6.7%  | 19.4% |
| RA3 | Weston Area Health NHS Trust                                     | 2191  | 1714  | 2146  | 4229  | 2258  | 12538  | 17.5% | 18.0% |
| RKE | Whittington Hospital NHS Trust                                   | 19614 | 18465 | 8121  | 4161  | 950   | 51311  | 38.2% | 1.9%  |
| RBL | Wirral University Teaching Hospital<br>NHS Foundation Trust      | 25451 | 12912 | 10107 | 10590 | 13683 | 72743  | 35.0% | 18.8% |
| RWP | Worcestershire Acute Hospitals NHS<br>Trust                      | 15580 | 17043 | 26647 | 31527 | 26507 | 117303 | 13.3% | 22.6% |
| RRF | Wrightington, Wigan and Leigh NHS<br>Foundation Trust            | 18005 | 11544 | 7010  | 8788  | 6943  | 52291  | 34.4% | 13.3% |
| RA4 | Yeovil District Hospital NHS<br>Foundation Trust                 | 1302  | 4053  | 11256 | 15046 | 5942  | 37598  | 3.5%  | 15.8% |
| RCB | York Hospitals NHS Trust                                         | 12363 | 15726 | 20085 | 25537 | 29526 | 103237 | 12.0% | 28.6% |

## Appendix

## Table A3

Paediatric hospital catchment populations by Trust, age group,  
English Hospital Episode Statistics, 2013/14

| Trustcode | Trust name                                                      | Region                              | Catchment population by age group |       |       |       |       | Total  | % 0-3s |
|-----------|-----------------------------------------------------------------|-------------------------------------|-----------------------------------|-------|-------|-------|-------|--------|--------|
|           |                                                                 |                                     | 0-3                               | 4-7   | 8-11  | 12-15 | 16-18 |        |        |
| REM       | Aintree University Hospitals NHS Foundation Trust               | North East Yorkshire and The Humber | 1818                              | 1744  | 1644  | 1883  | 1541  | 8631   | 21.1%  |
| RCF       | Airedale NHS Foundation Trust                                   | North West                          | 9281                              | 9223  | 8924  | 9434  | 7106  | 43968  | 21.1%  |
| RBS       | Alder Hey Childrens NHS Foundation Trust                        | North West                          | 30231                             | 27712 | 25622 | 28417 | 23244 | 135226 | 22.4%  |
| RTK       | Ashford and St Peter's Hospitals NHS Foundation Trust           | North East                          | 16376                             | 14965 | 13101 | 13060 | 10213 | 67714  | 24.2%  |
| RF4       | Barking, Havering and Redbridge University Hospitals NHS Trust  | North West                          | 34684                             | 33081 | 28805 | 29641 | 22922 | 149133 | 23.3%  |
| RVL       | Barnet and Chase Farm Hospitals NHS Trust                       | North West                          | 26673                             | 24951 | 21694 | 22451 | 17325 | 113094 | 23.6%  |
| RFF       | Barnsley Dist Gen Hosp NHS Foundation Trust                     | North West                          | 11289                             | 10815 | 9764  | 10761 | 8536  | 51165  | 22.1%  |
| R1H       | Barts Health NHS Trust                                          | London                              | 69552                             | 60372 | 51954 | 50043 | 38322 | 270243 | 25.7%  |
| RDD       | Basildon and Thurrock University Hospitals NHS Foundation Trust | South Central                       | 16850                             | 16379 | 14775 | 15694 | 12277 | 75975  | 22.2%  |
| RN5       | Basingstoke and North Hampshire Hospitals NHS Foundation Trust  | North West                          | 21759                             | 21503 | 19827 | 21349 | 16999 | 101435 | 21.5%  |
| RC1       | Bedford Hospital NHS Trust                                      | South West                          | 7063                              | 6759  | 6401  | 6780  | 5281  | 32284  | 21.9%  |
| RQ3       | Birmingham Children's Hospital NHS Foundation Trust             | South East                          | 37027                             | 34991 | 31558 | 32992 | 25507 | 162074 | 22.8%  |
| RR1       | Birmingham Heartlands and Solihull Trust                        | East of England                     | 37763                             | 37085 | 34660 | 36620 | 27490 | 173618 | 21.8%  |
| RLU       | Birmingham Women's NHS Foundation Trust                         | North East Yorkshire and The Humber | 587                               | 548   | 496   | 509   | 386   | 2526   | 23.3%  |
| RXL       | Blackpool Fylde and Wyre NHS Foundation Trust                   | North East Yorkshire and The Humber | 12381                             | 12441 | 11440 | 12976 | 10323 | 59561  | 20.8%  |
| RAE       | Bradford Teaching Hospitals NHS Foundation Trust                | North West                          | 25750                             | 24585 | 22183 | 22373 | 16401 | 111292 | 23.1%  |
| RXH       | Brighton and Sussex University Hospitals NHS Trust              | East Midlands                       | 22502                             | 21982 | 20756 | 21621 | 16885 | 103746 | 21.7%  |
| RXQ       | Buckinghamshire Healthcare NHS Trust                            | North West                          | 20687                             | 20445 | 19419 | 20336 | 15309 | 96197  | 21.5%  |
| RJF       | Burton Hospitals NHS Foundation Trust                           | Midlands                            | 13021                             | 12902 | 12449 | 13285 | 10375 | 62031  | 21.0%  |
| RWY       | Calderdale and Huddersfield NHS Foundation Trust                | North West                          | 21300                             | 20517 | 18846 | 20073 | 15695 | 96430  | 22.1%  |
| RGT       | Cambridge University Hospitals NHS Foundation Trust             | East of England                     | 20880                             | 19974 | 18545 | 19299 | 15897 | 94595  | 22.1%  |
| RYV       | Cambridgeshire Community Services NHS Trust                     | London                              | 8235                              | 7965  | 7611  | 8290  | 6375  | 38476  | 21.4%  |
| RW3       | Central Manchester University Hospitals NHS Foundation Trust    | South East Coast                    | 31203                             | 28764 | 24888 | 25753 | 20719 | 131327 | 23.8%  |
| RQM       | Chelsea and Westminster Hospital NHS Foundation Trust           | West Midlands                       | 24795                             | 20579 | 16881 | 15348 | 11263 | 88865  | 27.9%  |
| RFS       | Chesterfield Royal Hospital NHS Foundation Trust                | London                              | 11240                             | 11335 | 10693 | 12389 | 10133 | 55790  | 20.1%  |
| RBV       | Christie Hospital NHS Trust                                     | North West                          | 45                                | 46    | 39    | 41    | 31    | 202    | 22.5%  |
| RLN       | City Hospitals Sunderland NHS Foundation Trust                  | London                              | 13729                             | 13180 | 12033 | 13529 | 11081 | 63551  | 21.6%  |
| RDE       | Colchester Hospital University NHS Foundation Trust             | South Central                       | 15906                             | 15463 | 14685 | 16014 | 12567 | 74634  | 21.3%  |

1  
2  
3  
4  
5  
6  
7  
8  
9  
10  
11  
12  
13  
14  
15  
16  
17  
18  
19  
20  
21  
22  
23  
24  
25  
26  
27  
28  
29  
30  
31  
32  
33  
34  
35  
36  
37  
38  
39  
40  
41  
42  
43  
44  
45  
46  
47  
48  
49  
50  
51  
52  
53  
54  
55  
56  
57  
58  
59  
60

|     |                                                        |                          |       |       |       |       |       |        |       |
|-----|--------------------------------------------------------|--------------------------|-------|-------|-------|-------|-------|--------|-------|
| RJR | Countess Of Chester Hospital NHS Foundation Trust      | West Midlands            | 8830  | 9025  | 8486  | 9374  | 7263  | 42978  | 20.5% |
| RXP | County Durham and Darlington NHS Foundation Trust      | West Midlands            | 23118 | 22459 | 20601 | 22955 | 17986 | 107119 | 21.6% |
| RJ6 | Croydon Health Services NHS Trust                      | South Central            | 19036 | 17326 | 14621 | 15127 | 11979 | 78090  | 24.4% |
| RN7 | Dartford and Gravesham NHS Trust                       | North West               | 17567 | 16621 | 15111 | 16282 | 12942 | 78523  | 22.4% |
| RTG | Derby Hospitals NHS Foundation Trust                   | North East               | 22804 | 22075 | 20463 | 22140 | 17286 | 104768 | 21.8% |
| RP5 | Doncaster and Bassetlaw Hospitals NHS Foundation Trust | East Midlands            | 21433 | 20734 | 18777 | 20817 | 16720 | 98480  | 21.8% |
| RBD | Dorset County Hospital NHS Foundation Trust            | South West               | 7730  | 7900  | 7822  | 9036  | 6981  | 39469  | 19.6% |
| RC3 | Ealing Hospital NHS Trust                              | East of England          | 13404 | 11827 | 9917  | 9982  | 7690  | 52820  | 25.4% |
| RWH | East and North Hertfordshire NHS Trust                 | East Midlands            | 24087 | 22624 | 20756 | 21912 | 17405 | 106784 | 22.6% |
| RJN | East Cheshire NHS Trust                                | West Midlands            | 7386  | 7518  | 7181  | 8057  | 5886  | 36029  | 20.5% |
| RVV | East Kent Hospitals University NHS Foundation Trust    | South West               | 28405 | 28069 | 27047 | 30898 | 23963 | 138382 | 20.5% |
| RXR | East Lancashire Hospitals NHS Trust                    | North West               | 26277 | 25355 | 23365 | 24195 | 19048 | 118240 | 22.2% |
| RXC | East Sussex Hospitals NHS Trust                        | North West               | 15344 | 14850 | 14236 | 16419 | 12978 | 73828  | 20.8% |
| RVR | Epsom and St Helier University Hospitals NHS Trust     | London                   | 18036 | 17199 | 15795 | 17055 | 13076 | 81162  | 22.2% |
| RDU | Frimley Park Hospital NHS Trust                        | East of England          | 19009 | 18998 | 17419 | 18685 | 14485 | 88597  | 21.5% |
| RR7 | Gateshead Health NHS Foundation Trust                  | East of England          | 8547  | 7992  | 7290  | 7895  | 6517  | 38241  | 22.4% |
| RLT | George Eliot Hospital NHS Trust                        | West Midlands            | 4483  | 4249  | 3997  | 4351  | 3490  | 20570  | 21.8% |
| RTE | Gloucestershire Hospitals NHS Foundation Trust         | London                   | 25140 | 24496 | 23744 | 26056 | 21022 | 120459 | 20.9% |
| RP4 | Great Ormond Street Hospital NHS Trust                 | East Midlands            | 1819  | 1658  | 1425  | 1443  | 1111  | 7456   | 24.4% |
| RN3 | Great Western Hospitals NHS Foundation Trust           | North West               | 16945 | 16583 | 15601 | 16993 | 13226 | 79347  | 21.4% |
| RJ1 | Guy's and St Thomas' NHS Foundation Trust              | Yorkshire and The Humber | 18653 | 15903 | 13342 | 13289 | 10384 | 71571  | 26.1% |
| RCD | Harrogate and District NHS Foundation Trust            | Yorkshire and The Humber | 7954  | 8302  | 8076  | 8630  | 7183  | 40145  | 19.8% |
| RD7 | Heatherwood and Wexham Park Hosps NHS Foundation Trust | South West               | 23647 | 22231 | 19614 | 20153 | 15184 | 100829 | 23.5% |
| RLQ | Hereford Hospitals NHS Trust                           | West Midlands            | 7844  | 7663  | 7492  | 8498  | 6650  | 38147  | 20.6% |
| RQQ | Hinchingbrooke Healthcare NHS Trust                    | North West               | 1413  | 1397  | 1349  | 1492  | 1160  | 6811   | 20.7% |
| RQX | Homerton University Hospital NHS Foundation Trust      | London                   | 13796 | 11963 | 10167 | 9635  | 7017  | 52578  | 26.2% |
| RWA | Hull and East Yorkshire Hospitals NHS Trust            | North West               | 23323 | 22196 | 20393 | 22278 | 18495 | 106685 | 21.9% |
| RYJ | Imperial College Healthcare NHS Trust                  | South Central            | 19767 | 16580 | 14287 | 13669 | 10208 | 74510  | 26.5% |
| RGQ | Ipswich Hospital NHS Trust                             | East of England          | 14563 | 14705 | 13911 | 15774 | 12282 | 71234  | 20.4% |
| R1F | Isle of wight NHS Trust                                | South Central            | 5868  | 6025  | 5909  | 6954  | 5536  | 30292  | 19.4% |
| RGP | James Paget University Hospitals NHS Foundation Trust  | London                   | 9501  | 9074  | 8733  | 9664  | 8008  | 44979  | 21.1% |
| RNQ | Kettering General Hospital NHS Foundation Trust        | South East Coast         | 15249 | 14782 | 13456 | 14226 | 11094 | 68806  | 22.2% |
| RJZ | King's College Hospital NHS Foundation Trust           | Yorkshire and The Humber | 36878 | 32843 | 28353 | 28515 | 21510 | 148099 | 24.9% |
| RAX | Kingston Hospital NHS Trust                            | London                   | 17675 | 15747 | 13362 | 13077 | 9721  | 69583  | 25.4% |
| RXN | Lancashire Teaching Hospitals NHS Trust                | South East Coast         | 19428 | 18873 | 17358 | 18576 | 14600 | 88836  | 21.9% |

|    |     |                                         |            |       |       |       |       |       |        |       |
|----|-----|-----------------------------------------|------------|-------|-------|-------|-------|-------|--------|-------|
| 1  |     |                                         |            |       |       |       |       |       |        |       |
| 2  |     |                                         |            |       |       |       |       |       |        |       |
| 3  | RR8 | Leeds Teaching Hospitals NHS Trust      | London     | 36478 | 32264 | 28161 | 29234 | 24461 | 150597 | 24.2% |
| 4  |     | Liverpool Heart and Chest NHS           |            |       |       |       |       |       |        |       |
| 5  | RBQ | Foundation Trust                        | North West | 11    | 9     | 9     | 11    | 8     | 47     | 22.8% |
| 6  | REP | Liverpool Womens Hospital NHS Trust     | South West | 801   | 730   | 673   | 757   | 600   | 3561   | 22.5% |
| 7  | R1K | London North West Healthcare NHS        | London     | 123   | 107   | 93    | 92    | 72    | 486    | 25.4% |
| 8  |     | Trust                                   |            |       |       |       |       |       |        |       |
| 9  | RC9 | Luton and Dunstable Hospital NHS        | London     | 22229 | 21177 | 18857 | 18930 | 14694 | 95886  | 23.2% |
| 10 |     | Foundation Trust                        | London     |       |       |       |       |       |        |       |
| 11 | RWF | Maidstone and Tunbridge Wells NHS       | Yorkshire  |       |       |       |       |       |        |       |
| 12 |     | Trust                                   | and The    |       |       |       |       |       |        |       |
| 13 | RPA | Medway NHS Trust                        | Humber     | 20979 | 21734 | 20928 | 22499 | 17316 | 103455 | 20.3% |
| 14 | RQ8 | Mid Essex Hospital Services NHS Trust   | London     | 20258 | 19145 | 18099 | 19678 | 15517 | 92696  | 21.9% |
| 15 | RJD | Mid Staffordshire NHS Foundation Trust  | London     | 21569 | 21406 | 20268 | 21536 | 16631 | 101410 | 21.3% |
| 16 |     |                                         | Yorkshire  |       |       |       |       |       |        |       |
| 17 | RXF | Mid Yorkshire Hospitals NHS Trust       | and The    |       |       |       |       |       |        |       |
| 18 |     | Milton Keynes Hospital NHS Foundation   | Humber     |       |       |       |       |       |        |       |
| 19 | RD8 | Trust                                   | South West | 18353 | 17473 | 15472 | 15976 | 12108 | 79382  | 23.1% |
| 20 | RP6 | Moorfields Eye Hospital NHS Foundation  | South West | 240   | 200   | 172   | 169   | 135   | 916    | 26.2% |
| 21 |     | Trust                                   | West       |       |       |       |       |       |        |       |
| 22 | RTD | Newcastle Upon Tyne Hospitals NHS       | Midlands   | 26463 | 25348 | 23593 | 25451 | 20803 | 121658 | 21.8% |
| 23 |     | Foundation Trust                        | West       |       |       |       |       |       |        |       |
| 24 | RM1 | Norfolk and Norwich University          | Midlands   | 24191 | 23315 | 21946 | 24782 | 19927 | 114161 | 21.2% |
| 25 |     | Hospitals NHS Foundation Trust          |            |       |       |       |       |       |        |       |
| 26 | RVJ | North Bristol NHS Trust                 | North East | 10772 | 10160 | 9320  | 10168 | 8073  | 48493  | 22.2% |
| 27 | RNL | North Cumbria University Hospitals NHS  | South      |       |       |       |       |       |        |       |
| 28 |     | Trust                                   | Central    |       |       |       |       |       |        |       |
| 29 | RJL | North Lincolnshire and Goole Hosps NHS  | West       | 13759 | 13640 | 13119 | 14489 | 11626 | 66633  | 20.6% |
| 30 |     | Foundation Trust                        | Midlands   |       |       |       |       |       |        |       |
| 31 | RAP | North Middlesex University Hospital NHS | London     | 19088 | 18665 | 16976 | 18374 | 14798 | 87901  | 21.7% |
| 32 |     | Trust                                   |            |       |       |       |       |       |        |       |
| 33 | RVW | North Tees and Hartlepool NHS           | London     | 17728 | 16530 | 14485 | 14713 | 11114 | 74570  | 23.8% |
| 34 |     | Foundation Trust                        | South East |       |       |       |       |       |        |       |
| 35 | RV8 | North West London Hospitals NHS Trust   | Coast      | 13438 | 13002 | 11697 | 12891 | 10540 | 61569  | 21.8% |
| 36 |     | Northampton General Hospital NHS        | West       |       |       |       |       |       |        |       |
| 37 | RNS | Trust                                   | Midlands   | 28440 | 25812 | 23032 | 24078 | 18904 | 120266 | 23.6% |
| 38 | RBZ | Northern Devon Healthcare NHS Trust     | North West | 18338 | 17443 | 15690 | 16008 | 12517 | 79996  | 22.9% |
| 39 |     | Northumbria Healthcare NHS              |            |       |       |       |       |       |        |       |
| 40 | RTF | Foundation Trust                        | London     | 7353  | 7094  | 6883  | 7687  | 6131  | 35147  | 20.9% |
| 41 |     | Nottingham University Hospitals NHS     | West       |       |       |       |       |       |        |       |
| 42 | RX1 | Trust                                   | Midlands   | 14215 | 14128 | 13235 | 14280 | 11293 | 67151  | 21.2% |
| 43 | RTH | Oxford Radcliffe Hospital NHS Trust     | South West | 38032 | 36177 | 32352 | 34749 | 28267 | 169578 | 22.4% |
| 44 |     |                                         | Yorkshire  |       |       |       |       |       |        |       |
| 45 | RGM | Papworth Hospital NHS Foundation        | and The    |       |       |       |       |       |        |       |
| 46 |     | Trust                                   | Humber     | 16    | 13    | 12    | 12    | 8     | 60     | 26.0% |
| 47 | RW6 | Pennine Acute Hospitals NHS Trust       | North East | 40044 | 38040 | 33963 | 35296 | 26974 | 174316 | 23.0% |
| 48 |     | Peterborough and Stamford Hospitals     | East       |       |       |       |       |       |        |       |
| 49 | RGN | NHS Foundation Trust                    | Midlands   | 17474 | 16140 | 15033 | 16632 | 13216 | 78495  | 22.3% |
| 50 | RK9 | Plymouth Hospitals NHS Trust            | North West | 20142 | 19268 | 17833 | 20227 | 16284 | 93753  | 21.5% |
| 51 | RD3 | Poole Hospital NHS Foundation Trust     | East of    |       |       |       |       |       |        |       |
| 52 |     |                                         | England    |       |       |       |       |       |        |       |
| 53 | RHU | Portsmouth Hospitals NHS Trust          | South West | 21138 | 20146 | 18714 | 20732 | 16350 | 97080  | 21.8% |
| 54 |     |                                         | East of    |       |       |       |       |       |        |       |
| 55 | RQW | Princess Alexandra Hospital NHS Trust   | England    | 26999 | 26037 | 24156 | 26522 | 21110 | 124823 | 21.6% |
| 56 |     |                                         | Yorkshire  |       |       |       |       |       |        |       |
| 57 | RCX | Queen Elizabeth Hospital Kings Lynn     | and The    |       |       |       |       |       |        |       |
| 58 |     | NHS Foundation Trust                    | Humber     | 9956  | 9404  | 8915  | 9806  | 7954  | 46035  | 21.6% |
| 59 |     |                                         | Yorkshire  |       |       |       |       |       |        |       |
| 60 | RPC | Queen Victoria Hospital NHS Foundation  | and The    |       |       |       |       |       |        |       |
|    |     | Trust                                   | Humber     | 6726  | 6806  | 6428  | 6905  | 5354  | 32219  | 20.9% |
|    | RL1 | Robert Jones and Agnes Hunt             | South West | 13    | 15    | 14    | 17    | 10    | 68     | 19.2% |
|    |     | Orthopaedic NHS Trust                   |            |       |       |       |       |       |        |       |

1  
2  
3  
4  
5  
6  
7  
8  
9  
10  
11  
12  
13  
14  
15  
16  
17  
18  
19  
20  
21  
22  
23  
24  
25  
26  
27  
28  
29  
30  
31  
32  
33  
34  
35  
36  
37  
38  
39  
40  
41  
42  
43  
44  
45  
46  
47  
48  
49  
50  
51  
52  
53  
54  
55  
56  
57  
58  
59  
60

|     |                                                    |                          |       |       |       |       |       |        |       |
|-----|----------------------------------------------------|--------------------------|-------|-------|-------|-------|-------|--------|-------|
| RHW | Royal Berkshire Hospital NHS Foundation Trust      | South Central            | 23542 | 22147 | 19591 | 20554 | 15735 | 101569 | 23.2% |
| RMC | Royal Bolton Hospital NHS Foundation Trust         | East of England          | 19020 | 17844 | 16126 | 17514 | 13573 | 84077  | 22.6% |
| RDZ | Royal Bournemouth and Christchurch Trust           | East of England          | 1184  | 1124  | 1104  | 1208  | 1042  | 5662   | 20.9% |
| RT3 | Royal Brompton and Harefield NHS Foundation Trust  | West Midlands            | 947   | 861   | 732   | 730   | 554   | 3825   | 24.8% |
| REF | Royal Cornwall Hospitals NHS Trust                 | South West               | 19261 | 18490 | 17834 | 20317 | 15741 | 91643  | 21.0% |
| RH8 | Royal Devon and Exeter NHS Foundation Trust        | East of England          | 15899 | 15614 | 14645 | 16187 | 13175 | 75519  | 21.1% |
| RAL | Royal Free Hampstead NHS Trust                     | London                   | 12566 | 10985 | 9392  | 8837  | 6444  | 48224  | 26.1% |
| RQ6 | Royal Liverpool Broadgreen Hospitals NHS Trust     | South East Coast         | 2739  | 2435  | 2229  | 2558  | 2415  | 12377  | 22.1% |
| RRJ | Royal Orthopaedic Hospital NHS Foundation Trust    | North East               | 66    | 63    | 58    | 60    | 46    | 293    | 22.5% |
| RA2 | Royal Surrey County NHS Foundation Trust           | South East Coast         | 14365 | 14654 | 13725 | 14410 | 11549 | 68703  | 20.9% |
| RD1 | Royal United Hospital Bath NHS Trust               | Yorkshire and The Humber | 19311 | 19120 | 18258 | 20436 | 16080 | 93205  | 20.7% |
| RL4 | Royal Wolverhampton Hospital NHS Trust             | West Midlands            | 17885 | 16607 | 14912 | 16480 | 13260 | 79145  | 22.6% |
| RM3 | Salford Royal NHS Foundation Trust                 | West Midlands            | 8415  | 7550  | 6324  | 6878  | 5512  | 34678  | 24.3% |
| RNZ | Salisbury NHS Foundation Trust                     | North West               | 10069 | 9941  | 9456  | 10268 | 7884  | 47618  | 21.1% |
| RXK | Sandwell and West Birmingham Hospitals NHS Trust   | South East Coast         | 22881 | 21606 | 19303 | 19471 | 15136 | 98396  | 23.3% |
| RCU | Sheffield Children's NHS Foundation Trust          | Yorkshire and The Humber | 26393 | 25357 | 22926 | 23981 | 18891 | 117548 | 22.5% |
| RHQ | Sheffield Teaching Hospitals NHS Foundation Trust  | East of England          | 4173  | 4072  | 3698  | 3959  | 3504  | 19406  | 21.5% |
| RK5 | Sherwood Forest Hospitals NHS Foundation Trust     | North West               | 15327 | 14463 | 13411 | 14988 | 11922 | 70109  | 21.9% |
| RXW | Shrewsbury and Telford Hospital NHS Trust          | North East               | 20758 | 20636 | 19583 | 22029 | 17634 | 100640 | 20.6% |
| RA9 | South Devon Health Care NHS Trust                  | South West               | 10266 | 10292 | 9849  | 11414 | 9087  | 50908  | 20.2% |
| RYQ | South London Healthcare NHS Trust                  | North West               | 9733  | 8978  | 7495  | 7661  | 5963  | 39830  | 24.4% |
| RTR | South Tees Hospitals NHS Foundation Trust          | South Central            | 21107 | 20352 | 18832 | 20614 | 17076 | 97981  | 21.5% |
| RE9 | South Tyneside NHS Foundation Trust                | Central South East Coast | 5167  | 4960  | 4605  | 5200  | 4367  | 24299  | 21.3% |
| RJC | South Warwickshire NHS Foundation Trust            | London                   | 9876  | 9961  | 9580  | 10252 | 7799  | 47468  | 20.8% |
| RHM | Southampton University Hospitals NHS Trust         | East of England          | 26822 | 24691 | 22306 | 24038 | 19353 | 117210 | 22.9% |
| RAJ | Southend University Hospitals NHS Foundation Trust | East of England          | 14453 | 14083 | 13221 | 14890 | 11647 | 68295  | 21.2% |
| RVY | Southport and Ormskirk Hospital NHS Trust          | London                   | 10260 | 10611 | 10266 | 11640 | 9066  | 51841  | 19.8% |
| RJ7 | St George's Healthcare NHS Trust                   | London                   | 31284 | 25426 | 20910 | 20320 | 15187 | 113127 | 27.7% |
| RBN | St Helens and Knowsley Hospitals NHS Trust         | North West               | 14440 | 13666 | 12525 | 14139 | 11216 | 65986  | 21.9% |
| RWJ | Stockport NHS Foundation Trust                     | South East Coast         | 14134 | 14058 | 12724 | 14042 | 10899 | 65856  | 21.5% |
| RTP | Surrey and Sussex Healthcare NHS Trust             | East Midlands            | 20733 | 19727 | 18279 | 19669 | 14772 | 93180  | 22.3% |
| RMP | Tameside Hospital NHS Foundation Trust             | North West               | 11004 | 10191 | 9117  | 9808  | 7758  | 47877  | 23.0% |
| RBA | Taunton and Somerset NHS Foundation Trust          | South West               | 13532 | 13249 | 12818 | 14902 | 12026 | 66528  | 20.3% |
| RNA | The Dudley Group Of Hospitals NHS Foundation Trust | South West               | 17348 | 17061 | 15890 | 16886 | 13631 | 80817  | 21.5% |
| RAS | The Hillingdon Hospital NHS Trust                  | London                   | 14886 | 13457 | 11438 | 12017 | 9399  | 61198  | 24.3% |
| RJ2 | The Lewisham Healthcare NHS Trust                  | South Central            | 26515 | 23543 | 19021 | 19211 | 14991 | 103280 | 25.7% |

1  
2  
3  
4  
5  
6  
7  
8  
9  
10  
11  
12  
13  
14  
15  
16  
17  
18  
19  
20  
21  
22  
23  
24  
25  
26  
27  
28  
29  
30  
31  
32  
33  
34  
35  
36  
37  
38  
39  
40  
41  
42  
43  
44  
45  
46  
47  
48  
49  
50  
51  
52  
53  
54  
55  
56  
57  
58  
59  
60

|     |                                                               |                                     |       |       |       |       |       |        |       |
|-----|---------------------------------------------------------------|-------------------------------------|-------|-------|-------|-------|-------|--------|-------|
| RBT | The Mid Cheshire Hospitals NHS Trust                          | North West                          | 12002 | 12187 | 11324 | 12439 | 10011 | 57962  | 20.7% |
| RFR | The Rotherham NHS Foundation Trust                            | North West                          | 10858 | 10519 | 9827  | 10678 | 8464  | 50347  | 21.6% |
| RPY | The Royal Marsden NHS Foundation Trust                        | London                              | 82    | 81    | 70    | 67    | 49    | 348    | 23.4% |
| RAN | The Royal National Orthopaedic Hospital NHS Trust             | London                              | 72    | 61    | 56    | 58    | 43    | 289    | 24.7% |
| RET | The Walton Centre NHS Foundation Trust                        | North West                          | 51    | 53    | 51    | 58    | 43    | 255    | 19.9% |
| RWD | United Lincolnshire Hospitals NHS Trust                       | North West                          | 24615 | 23171 | 22206 | 25501 | 20431 | 115924 | 21.2% |
| RRV | University College London Hospitals NHS Foundation Trust      | North West Yorkshire and The Humber | 10842 | 9383  | 8334  | 7939  | 6283  | 42780  | 25.3% |
| RRK | University Hospital Birmingham NHS Foundation Trust           | Humber                              | 2588  | 2481  | 2271  | 2526  | 2242  | 12108  | 21.4% |
| RJE | University Hospital Of North Staffordshire Hospital NHS Trust | London                              | 24197 | 23673 | 21218 | 23229 | 18389 | 110705 | 21.9% |
| RM2 | University Hospital Of South Manchester NHS Foundation Trust  | West Midlands                       | 16366 | 15706 | 13856 | 14309 | 10658 | 70896  | 23.1% |
| RKB | University Hospitals Coventry and Warwickshire NHS Trust      | London                              | 29209 | 26892 | 24075 | 25340 | 21005 | 126521 | 23.1% |
| RA7 | University Hospitals Of Bristol NHS Foundation Trust          | South West                          | 34426 | 31174 | 27560 | 29230 | 22798 | 145188 | 23.7% |
| RWE | University Hospitals Of Leicester NHS Trust                   | North West                          | 41652 | 40105 | 36915 | 39238 | 31954 | 189865 | 21.9% |
| RTX | University Hospitals Of Morecambe Bay NHS Foundation Trust    | South East Coast                    | 13424 | 13509 | 13122 | 15302 | 12638 | 67995  | 19.7% |
| RBK | Walsall Hospitals NHS Trust                                   | South West                          | 12567 | 12034 | 11231 | 11654 | 8966  | 56452  | 22.3% |
| RWW | Warrington and Halton Hospitals NHS Foundation Trust          | East of England                     | 13354 | 13099 | 12099 | 13081 | 10137 | 61770  | 21.6% |
| RWG | West Hertfordshire Hospitals NHS Trust                        | East of England                     | 22776 | 20977 | 19053 | 19683 | 14997 | 97486  | 23.4% |
| RFW | West Middlesex University NHS Trust                           | Midlands Yorkshire and The Humber   | 18219 | 15328 | 12170 | 12232 | 9481  | 67430  | 27.0% |
| RGR | West Suffolk Hospital NHS Trust                               | East of England                     | 12376 | 12108 | 11246 | 12210 | 9241  | 57180  | 21.6% |
| RYR | Western Sussex Hospitals NHS Trust                            | West Midlands                       | 19777 | 19254 | 18054 | 19539 | 15145 | 91769  | 21.6% |
| RA3 | Weston Area Health NHS Trust                                  | South West East                     | 2682  | 2527  | 2462  | 2734  | 2132  | 12538  | 21.4% |
| RKE | Whittington Hospital NHS Trust                                | Midlands                            | 13329 | 11370 | 10013 | 9702  | 6897  | 51311  | 26.0% |
| RBL | Wirral University Teaching Hospital NHS Foundation Trust      | West Midlands                       | 15335 | 15076 | 14312 | 15661 | 12359 | 72743  | 21.1% |
| RWP | Worcestershire Acute Hospitals NHS Trust                      | East of England                     | 24382 | 24310 | 22996 | 25499 | 20116 | 117303 | 20.8% |
| RRF | Wrightington, Wigan and Leigh NHS Foundation Trust            | West Midlands                       | 11380 | 11210 | 10239 | 10748 | 8714  | 52291  | 21.8% |
| RA4 | Yeovil District Hospital NHS Foundation Trust                 | South West                          | 7418  | 7357  | 7148  | 8704  | 6971  | 37598  | 19.7% |
| RCB | York Hospitals NHS Trust                                      | East of England                     | 21400 | 21300 | 19843 | 22308 | 18387 | 103238 | 20.7% |



## Appendix Table A4

### Admission rates by Trust for primary diagnosis epilepsy, any diagnosis epilepsy, all-cause admissions, per 100,000, 2014/15, England

| Trust code | Trust name                                                      | 2014/15 Hospital Catchment Population | Number of admissions       |                        |           | Admission rate per 100,000 |                        |           |
|------------|-----------------------------------------------------------------|---------------------------------------|----------------------------|------------------------|-----------|----------------------------|------------------------|-----------|
|            |                                                                 |                                       | Primary diagnosis epilepsy | Any epilepsy diagnosis | All-cause | Primary diagnosis epilepsy | Any epilepsy diagnosis | All-cause |
| REM        | Aintree University Hospitals NHS Foundation Trust               | 10848                                 | 3                          | 8                      | 677       | 27.7                       | 73.7                   | 6240.5    |
| RCF        | Airedale NHS Foundation Trust                                   | 43450                                 | 31                         | 143                    | 3976      | 71.3                       | 329.1                  | 9150.7    |
| RBS        | Alder Hey Childrens NHS Foundation Trust                        | 134281                                | 61                         | 253                    | 10429     | 45.4                       | 188.4                  | 7766.6    |
| RTK        | Ashford and St Peter's Hospitals NHS Foundation Trust           | 67049                                 | 45                         | 72                     | 3423      | 67.1                       | 107.4                  | 5105.2    |
| RF4        | Barking, Havering and Redbridge University Hospitals NHS Trust  | 145366                                | 68                         | 136                    | 6777      | 46.8                       | 93.6                   | 4662.0    |
| RFF        | Barnsley Dist Gen Hosp NHS Foundation Trust                     | 52966                                 | 52                         | 104                    | 4690      | 98.2                       | 196.4                  | 8854.7    |
| R1H        | Barts Health NHS Trust                                          | 268558                                | 186                        | 401                    | 15818     | 69.3                       | 149.3                  | 5890.0    |
| RDD        | Basildon and Thurrock University Hospitals NHS Foundation Trust | 77489                                 | 56                         | 91                     | 3243      | 72.3                       | 117.4                  | 4185.1    |
| RN5        | Basingstoke and North Hampshire Hospitals NHS Foundation Trust  | 99421                                 | 97                         | 179                    | 6280      | 97.6                       | 180.0                  | 6316.6    |
| RC1        | Bedford Hospital NHS Trust                                      | 48718                                 | 35                         | 82                     | 2796      | 71.8                       | 168.3                  | 5739.2    |
| RQ3        | Birmingham Children's Hospital NHS Foundation Trust             | 159686                                | 207                        | 519                    | 13716     | 129.6                      | 325.0                  | 8589.4    |
| RR1        | Birmingham Heartlands and Solihull Trust                        | 180098                                | 127                        | 253                    | 13882     | 70.5                       | 140.5                  | 7708.0    |
| RLU        | Birmingham Women's NHS Foundation Trust                         | 2897                                  | 0                          | 0                      | 135       | 0.0                        | 0.0                    | 4659.7    |
| RXL        | Blackpool Fylde and Wyre NHS Foundation Trust                   | 60397                                 | 63                         | 156                    | 6562      | 104.3                      | 258.3                  | 10864.7   |
| RAE        | Bradford Teaching Hospitals NHS Foundation Trust                | 111030                                | 82                         | 247                    | 7315      | 73.9                       | 222.5                  | 6588.3    |
| RXH        | Brighton and Sussex University Hospitals NHS Trust              | 105282                                | 39                         | 122                    | 6239      | 37.0                       | 115.9                  | 5926.0    |
| RXQ        | Buckinghamshire Healthcare NHS Trust                            | 99550                                 | 53                         | 137                    | 7598      | 53.2                       | 137.6                  | 7632.4    |
| RJF        | Burton Hospitals NHS Foundation Trust                           | 61559                                 | 88                         | 157                    | 4629      | 143.0                      | 255.0                  | 7519.6    |
| RWY        | Calderdale and Huddersfield NHS Foundation Trust                | 95715                                 | 85                         | 178                    | 7533      | 88.8                       | 186.0                  | 7870.2    |
| RGT        | Cambridge University Hospitals NHS Foundation Trust             | 94647                                 | 58                         | 187                    | 4788      | 61.3                       | 197.6                  | 5058.8    |
| RYV        | Cambridgeshire Community Services NHS Trust                     | 38372                                 | 24                         | 71                     | 3526      | 62.5                       | 185.0                  | 9188.9    |
| RW3        | Central Manchester University Hospitals NHS Foundation Trust    | 134340                                | 115                        | 344                    | 13703     | 85.6                       | 256.1                  | 10200.2   |
| RQM        | Chelsea and Westminster Hospital NHS Foundation Trust           | 86439                                 | 30                         | 57                     | 4264      | 34.7                       | 65.9                   | 4932.9    |
| RFS        | Chesterfield Royal Hospital NHS Foundation Trust                | 56603                                 | 52                         | 106                    | 4469      | 91.9                       | 187.3                  | 7895.4    |
| RBV        | Christie Hospital NHS Trust                                     | 231                                   | 0                          | 0                      | 61        | 0.0                        | 0.0                    | 26449.3   |
| RLN        | City Hospitals Sunderland NHS Foundation Trust                  | 63650                                 | 49                         | 122                    | 5326      | 77.0                       | 191.7                  | 8367.6    |
| REN        | Clatterbridge Centre For Oncology NHS Foundation Trust          | 45                                    | 0                          | 0                      | 7         | 0.0                        | 0.0                    | 15534.8   |
| RDE        | Colchester Hospital University NHS Foundation Trust             | 75048                                 | 71                         | 202                    | 6953      | 94.6                       | 269.2                  | 9264.7    |
| RJR        | Countess Of Chester Hospital NHS Foundation Trust               | 43204                                 | 25                         | 68                     | 3956      | 57.9                       | 157.4                  | 9156.6    |
| RXP        | County Durham and Darlington NHS Foundation Trust               | 108941                                | 100                        | 241                    | 11180     | 91.8                       | 221.2                  | 10262.4   |
| RJ6        | Croydon Health Services NHS Trust                               | 77160                                 | 41                         | 57                     | 4146      | 53.1                       | 73.9                   | 5373.3    |
| RN7        | Dartford and Gravesham NHS Trust                                | 77768                                 | 54                         | 116                    | 6132      | 69.4                       | 149.2                  | 7885.0    |
| RTG        | Derby Hospitals NHS Foundation Trust                            | 101709                                | 55                         | 117                    | 4166      | 54.1                       | 115.0                  | 4096.0    |
| RP5        | Doncaster and Bassetlaw Hospitals NHS Foundation Trust          | 100244                                | 73                         | 143                    | 9408      | 72.8                       | 142.7                  | 9385.1    |
| RBD        | Dorset County Hospital NHS Foundation Trust                     | 38763                                 | 22                         | 56                     | 2440      | 56.8                       | 144.5                  | 6294.7    |
| RWH        | East and North Hertfordshire NHS Trust                          | 105074                                | 93                         | 155                    | 7140      | 88.5                       | 147.5                  | 6795.2    |

1  
2  
3  
4  
5  
6  
7  
8  
9  
10  
11  
12  
13  
14  
15  
16  
17  
18  
19  
20  
21  
22  
23  
24  
25  
26  
27  
28  
29  
30  
31  
32  
33  
34  
35  
36  
37  
38  
39  
40  
41  
42  
43  
44  
45  
46  
47  
48  
49  
50  
51  
52  
53  
54  
55  
56  
57  
58  
59  
60

|     |                                                               |        |     |     |       |       |       |         |
|-----|---------------------------------------------------------------|--------|-----|-----|-------|-------|-------|---------|
| RJN | East Cheshire NHS Trust                                       | 35913  | 44  | 102 | 3176  | 122.5 | 284.0 | 8843.7  |
| RVV | East Kent Hospitals University NHS Foundation Trust           | 141973 | 106 | 236 | 10817 | 74.7  | 166.2 | 7619.1  |
| RXR | East Lancashire Hospitals NHS Trust                           | 117300 | 87  | 326 | 13702 | 74.2  | 277.9 | 11681.2 |
| RXC | East Sussex Hospitals NHS Trust                               | 73412  | 83  | 134 | 5951  | 113.1 | 182.5 | 8106.3  |
| RVR | Epsom and St Helier University Hospitals NHS Trust            | 85745  | 54  | 153 | 4532  | 63.0  | 178.4 | 5285.4  |
| RDU | Frimley Park Hospital NHS Trust                               | 190069 | 144 | 301 | 13022 | 75.8  | 158.4 | 6851.2  |
| RR7 | Gateshead Health NHS Foundation Trust                         | 36789  | 16  | 30  | 3086  | 43.5  | 81.5  | 8388.4  |
| RLT | George Eliot Hospital NHS Trust                               | 19381  | 1   | 4   | 1108  | 5.2   | 20.6  | 5717.0  |
| RTE | Gloucestershire Hospitals NHS Foundation Trust                | 119516 | 67  | 197 | 8192  | 56.1  | 164.8 | 6854.3  |
| RP4 | Great Ormond Street Hospital NHS Trust                        | 6236   | 16  | 32  | 612   | 256.6 | 513.1 | 9813.4  |
| RN3 | Great Western Hospitals NHS Foundation Trust                  | 82167  | 41  | 116 | 5800  | 49.9  | 141.2 | 7058.8  |
| RJ1 | Guy's and St Thomas' NHS Foundation Trust                     | 64902  | 71  | 142 | 4269  | 109.4 | 218.8 | 6577.6  |
| RCD | Harrogate and District NHS Foundation Trust                   | 40560  | 12  | 39  | 3148  | 29.6  | 96.2  | 7761.3  |
| RLQ | Hereford Hospitals NHS Trust                                  | 39130  | 42  | 78  | 3204  | 107.3 | 199.3 | 8188.1  |
| RQQ | Hinchingbrooke Healthcare NHS Trust                           | 6738   | 4   | 6   | 454   | 59.4  | 89.0  | 6738.0  |
| RQX | Homerton University Hospital NHS Foundation Trust             | 49332  | 42  | 68  | 2576  | 85.1  | 137.8 | 5221.7  |
| RWA | Hull and East Yorkshire Hospitals NHS Trust                   | 106281 | 112 | 230 | 6395  | 105.4 | 216.4 | 6017.1  |
| RYJ | Imperial College Healthcare NHS Trust                         | 75876  | 54  | 111 | 3572  | 71.2  | 146.3 | 4707.7  |
| RGQ | Ipswich Hospital NHS Trust                                    | 71379  | 43  | 126 | 4687  | 60.2  | 176.5 | 6566.3  |
| R1F | Isle of wight NHS Trust                                       | 28924  | 29  | 53  | 2323  | 100.3 | 183.2 | 8031.5  |
| RGP | James Paget University Hospitals NHS Foundation Trust         | 43863  | 29  | 51  | 2653  | 66.1  | 116.3 | 6048.3  |
| RNQ | Kettering General Hospital NHS Foundation Trust               | 67436  | 72  | 132 | 5226  | 106.8 | 195.7 | 7749.6  |
| RJZ | King's College Hospital NHS Foundation Trust                  | 150224 | 125 | 199 | 7881  | 83.2  | 132.5 | 5246.2  |
| RAX | Kingston Hospital NHS Trust                                   | 70421  | 26  | 69  | 3755  | 36.9  | 98.0  | 5332.2  |
| RXN | Lancashire Teaching Hospitals NHS Trust                       | 87841  | 56  | 151 | 8954  | 63.8  | 171.9 | 10193.4 |
| RR8 | Leeds Teaching Hospitals NHS Trust                            | 151367 | 91  | 251 | 9325  | 60.1  | 165.8 | 6160.5  |
| RBQ | Liverpool Heart and Chest NHS Foundation Trust                | 64     | 0   | 0   | 19    | 0.0   | 0.0   | 29608.9 |
| REP | Liverpool Womens Hospital NHS Trust                           | 2475   | 0   | 0   | 160   | 0.0   | 0.0   | 6464.3  |
| R1K | London North West Healthcare NHS Trust                        | 166660 | 93  | 208 | 8497  | 55.8  | 124.8 | 5098.4  |
| RC9 | Luton and Dunstable Hospital NHS Foundation Trust             | 96289  | 79  | 188 | 8583  | 82.0  | 195.2 | 8913.8  |
| RWF | Maidstone and Tunbridge Wells NHS Trust                       | 104481 | 64  | 98  | 4740  | 61.3  | 93.8  | 4536.7  |
| RPA | Medway NHS Trust                                              | 92044  | 115 | 245 | 8111  | 124.9 | 266.2 | 8812.1  |
| RQ8 | Mid Essex Hospital Services NHS Trust                         | 100503 | 37  | 87  | 5353  | 36.8  | 86.6  | 5326.2  |
| RJD | Mid Staffordshire NHS Foundation Trust                        | 26235  | 12  | 26  | 2575  | 45.7  | 99.1  | 9815.2  |
| RXF | Mid Yorkshire Hospitals NHS Trust                             | 133869 | 94  | 208 | 9932  | 70.2  | 155.4 | 7419.2  |
| RD8 | Milton Keynes Hospital NHS Foundation Trust                   | 68737  | 99  | 226 | 6477  | 144.0 | 328.8 | 9422.8  |
| RP6 | Moorfields Eye Hospital NHS Foundation Trust                  | 843    | 0   | 0   | 44    | 0.0   | 0.0   | 5217.1  |
| RTD | Newcastle Upon Tyne Hospitals NHS Foundation Trust            | 124257 | 189 | 472 | 14198 | 152.1 | 379.9 | 11426.3 |
| RM1 | Norfolk and Norwich University Hospitals NHS Foundation Trust | 118394 | 99  | 253 | 8667  | 83.6  | 213.7 | 7320.5  |
| RVJ | North Bristol NHS Trust                                       | 19435  | 6   | 17  | 975   | 30.9  | 87.5  | 5016.8  |
| RNL | North Cumbria University Hospitals NHS Trust                  | 66748  | 61  | 116 | 5837  | 91.4  | 173.8 | 8744.8  |
| RJL | North Lincolnshire and Goole Hosps NHS Foundation Trust       | 87428  | 100 | 202 | 5471  | 114.4 | 231.0 | 6257.7  |
| RAP | North Middlesex University Hospital NHS Trust                 | 96137  | 75  | 140 | 7613  | 78.0  | 145.6 | 7918.9  |
| RVW | North Tees and Hartlepool NHS Foundation Trust                | 61068  | 49  | 133 | 5039  | 80.2  | 217.8 | 8251.5  |
| RNS | Northampton General Hospital NHS Trust                        | 80178  | 80  | 210 | 7464  | 99.8  | 261.9 | 9309.2  |
| RBZ | Northern Devon Healthcare NHS Trust                           | 34821  | 14  | 55  | 2528  | 40.2  | 158.0 | 7260.0  |
| RTF | Northumbria Healthcare NHS Foundation Trust                   | 65421  | 54  | 108 | 5489  | 82.5  | 165.1 | 8390.3  |
| RX1 | Nottingham University Hospitals NHS Trust                     | 172520 | 126 | 275 | 8811  | 73.0  | 159.4 | 5107.2  |
| RTH | Oxford Radcliffe Hospital NHS Trust                           | 153875 | 90  | 240 | 10252 | 58.5  | 156.0 | 6662.5  |

|    |     |                                                          |        |     |     |       |       |        |         |
|----|-----|----------------------------------------------------------|--------|-----|-----|-------|-------|--------|---------|
| 1  |     |                                                          |        |     |     |       |       |        |         |
| 2  |     |                                                          |        |     |     |       |       |        |         |
| 3  | RGM | Papworth Hospital NHS Foundation Trust                   | 69     | 0   | 1   | 15    | 0.0   | 1444.5 | 21666.9 |
| 4  | RW6 | Pennine Acute Hospitals NHS Trust                        | 172774 | 139 | 339 | 17532 | 80.5  | 196.2  | 10147.4 |
| 5  |     | Peterborough and Stamford Hospitals NHS Foundation       |        |     |     |       |       |        |         |
| 6  | RGN | Trust                                                    | 79335  | 64  | 179 | 6925  | 80.7  | 225.6  | 8728.8  |
| 7  | RK9 | Plymouth Hospitals NHS Trust                             | 93846  | 78  | 164 | 7139  | 83.1  | 174.8  | 7607.1  |
| 8  | RD3 | Poole Hospital NHS Foundation Trust                      | 97422  | 67  | 250 | 7897  | 68.8  | 256.6  | 8106.0  |
| 9  | RHU | Portsmouth Hospitals NHS Trust                           | 118416 | 99  | 198 | 7045  | 83.6  | 167.2  | 5949.4  |
| 10 | RQW | Princess Alexandra Hospital NHS Trust                    | 61910  | 28  | 53  | 2748  | 45.2  | 85.6   | 4438.7  |
| 11 |     |                                                          |        |     |     | 4     |       |        |         |
| 12 |     |                                                          |        |     |     | 1     |       |        | 92      |
| 13 | RCX | Queen Elizabeth Hospital Kings Lynn NHS Foundation Trust | 44609  | 43  | 112 | 6     | 96.4  | 251.1  | .2      |
| 14 | RPC | Queen Victoria Hospital NHS Foundation Trust             | 28764  | 0   | 7   | 1223  | 0.0   | 24.3   | 4251.8  |
| 15 | RL1 | Robert Jones and Agnes Hunt Orthopaedic NHS Trust        | 93     | 0   | 0   | 4     | 0.0   | 0.0    | 4316.4  |
| 16 | RHW | Royal Berkshire Hospital NHS Foundation Trust            | 100771 | 92  | 166 | 5495  | 91.3  | 164.7  | 5453.0  |
| 17 | RMC | Royal Bolton Hospital NHS Foundation Trust               | 84314  | 59  | 151 | 7436  | 70.0  | 179.1  | 8819.4  |
| 18 | RDZ | Royal Bournemouth and Christchurch Trust                 | 6007   | 3   | 6   | 423   | 49.9  | 99.9   | 7041.3  |
| 19 | RT3 | Royal Brompton and Harefield NHS Foundation Trust        | 3899   | 0   | 6   | 317   | 0.0   | 153.9  | 8131.0  |
| 20 | REF | Royal Cornwall Hospitals NHS Trust                       | 91698  | 79  | 168 | 6931  | 86.2  | 183.2  | 7558.5  |
| 21 | RH8 | Royal Devon and Exeter NHS Foundation Trust              | 78322  | 68  | 149 | 6081  | 86.8  | 190.2  | 7764.1  |
| 22 | RAL | Royal Free Hampstead NHS Trust                           | 155113 | 97  | 211 | 8688  | 62.5  | 136.0  | 5601.1  |
| 23 | RQ6 | Royal Liverpool Broadgreen Hospitals NHS Trust           | 12110  | 3   | 9   | 711   | 24.8  | 74.3   | 5871.3  |
| 24 | RRJ | Royal Orthopaedic Hospital NHS Foundation Trust          | 405    | 0   | 1   | 25    | 0.0   | 246.8  | 6170.2  |
| 25 | RA2 | Royal Surrey County NHS Foundation Trust                 | 67670  | 37  | 72  | 3653  | 54.7  | 106.4  | 5398.3  |
| 26 | RD1 | Royal United Hospital Bath NHS Trust                     | 92029  | 63  | 178 | 6010  | 68.5  | 193.4  | 6530.5  |
| 27 | RL4 | Royal Wolverhampton Hospital NHS Trust                   | 79276  | 125 | 242 | 8040  | 157.7 | 305.3  | 10141.8 |
| 28 | RM3 | Salford Royal NHS Foundation Trust                       | 34985  | 32  | 50  | 2939  | 91.5  | 142.9  | 8400.8  |
| 29 | RNZ | Salisbury NHS Foundation Trust                           | 47659  | 17  | 52  | 2341  | 35.7  | 109.1  | 4912.0  |
| 30 | RXK | Sandwell and West Birmingham Hospitals NHS Trust         | 100183 | 72  | 161 | 8815  | 71.9  | 160.7  | 8798.9  |
| 31 | RCU | Sheffield Children's NHS Foundation Trust                | 102197 | 73  | 208 | 7095  | 71.4  | 203.5  | 6942.5  |
| 32 | RHQ | Sheffield Teaching Hospitals NHS Foundation Trust        | 27899  | 4   | 8   | 1326  | 14.3  | 28.7   | 4752.9  |
| 33 | RK5 | Sherwood Forest Hospitals NHS Foundation Trust           | 70777  | 26  | 98  | 4878  | 36.7  | 138.5  | 6892.1  |
| 34 | RXW | Shrewsbury and Telford Hospital NHS Trust                | 102368 | 68  | 166 | 7760  | 66.4  | 162.2  | 7580.5  |
| 35 | RA9 | South Devon Health Care NHS Trust                        | 50569  | 38  | 92  | 2755  | 75.1  | 181.9  | 5448.0  |
| 36 | RTR | South Tees Hospitals NHS Foundation Trust                | 98197  | 110 | 292 | 9914  | 112.0 | 297.4  | 10096.1 |
| 37 | RE9 | South Tyneside NHS Foundation Trust                      | 23625  | 12  | 21  | 1595  | 50.8  | 88.9   | 6751.4  |
| 38 | RJC | South Warwickshire NHS Foundation Trust                  | 46629  | 39  | 81  | 3481  | 83.6  | 173.7  | 7465.3  |
| 39 | RHM | Southampton University Hospitals NHS Trust               | 120636 | 116 | 230 | 10139 | 96.2  | 190.7  | 8404.6  |
| 40 | RAJ | Southend University Hospitals NHS Foundation Trust       | 66039  | 25  | 77  | 2835  | 37.9  | 116.6  | 4292.9  |
| 41 | RVY | Southport and Ormskirk Hospital NHS Trust                | 53484  | 37  | 71  | 4329  | 69.2  | 132.7  | 8094.0  |
| 42 | RJ7 | St George's Healthcare NHS Trust                         | 118041 | 74  | 150 | 7046  | 62.7  | 127.1  | 5969.1  |
| 43 | RBN | St Helens and Knowsley Hospitals NHS Trust               | 67966  | 28  | 86  | 6654  | 41.2  | 126.5  | 9790.2  |
| 44 | RWJ | Stockport NHS Foundation Trust                           | 63583  | 59  | 111 | 5540  | 92.8  | 174.6  | 8713.0  |
| 45 | RTP | Surrey and Sussex Healthcare NHS Trust                   | 83612  | 36  | 91  | 3986  | 43.1  | 108.8  | 4767.3  |
| 46 | RMP | Tameside Hospital NHS Foundation Trust                   | 48707  | 44  | 97  | 4406  | 90.3  | 199.1  | 9045.9  |
| 47 | RBA | Taunton and Somerset NHS Foundation Trust                | 66116  | 54  | 134 | 4714  | 81.7  | 202.7  | 7129.9  |
| 48 | RNA | The Dudley Group Of Hospitals NHS Foundation Trust       | 81498  | 46  | 117 | 6976  | 56.4  | 143.6  | 8559.8  |
| 49 | RAS | The Hillingdon Hospital NHS Trust                        | 65195  | 50  | 106 | 4471  | 76.7  | 162.6  | 6857.8  |
| 50 | RJ2 | The Lewisham Healthcare NHS Trust                        | 151669 | 100 | 207 | 11784 | 65.9  | 136.5  | 7769.5  |
| 51 | RBT | The Mid Cheshire Hospitals NHS Trust                     | 56699  | 56  | 147 | 4507  | 98.8  | 259.3  | 7949.0  |
| 52 | RFR | The Rotherham NHS Foundation Trust                       | 52577  | 29  | 81  | 3858  | 55.2  | 154.1  | 7337.8  |
| 53 |     |                                                          |        |     |     |       |       |        |         |
| 54 |     |                                                          |        |     |     |       |       |        |         |
| 55 |     |                                                          |        |     |     |       |       |        |         |
| 56 |     |                                                          |        |     |     |       |       |        |         |
| 57 |     |                                                          |        |     |     |       |       |        |         |
| 58 |     |                                                          |        |     |     |       |       |        |         |
| 59 |     |                                                          |        |     |     |       |       |        |         |
| 60 |     |                                                          |        |     |     |       |       |        |         |

1  
2  
3  
4  
5  
6  
7  
8  
9  
10  
11  
12  
13  
14  
15  
16  
17  
18  
19  
20  
21  
22  
23  
24  
25  
26  
27  
28  
29  
30  
31  
32  
33  
34  
35  
36  
37  
38  
39  
40  
41  
42  
43  
44  
45  
46  
47  
48  
49  
50  
51  
52  
53  
54  
55  
56  
57  
58  
59  
60

|     |                                                               |        |     |     |       |       |        |          |
|-----|---------------------------------------------------------------|--------|-----|-----|-------|-------|--------|----------|
| RPY | The Royal Marsden NHS Foundation Trust                        | 104    | 0   | 1   | 108   | 0.0   | 963.5  | 104056.3 |
| RAN | The Royal National Orthopaedic Hospital NHS Trust             | 409    | 0   | 2   | 47    | 0.0   | 489.4  | 11500.7  |
| RET | The Walton Centre NHS Foundation Trust                        | 281    | 1   | 3   | 34    | 355.7 | 1067.1 | 12094.0  |
| RWD | United Lincolnshire Hospitals NHS Trust                       | 112401 | 60  | 205 | 7860  | 53.4  | 182.4  | 6992.8   |
| RRV | University College London Hospitals NHS Foundation Trust      | 42106  | 12  | 23  | 1698  | 28.5  | 54.6   | 4032.6   |
| RRK | University Hospital Birmingham NHS Foundation Trust           | 10979  | 11  | 29  | 764   | 100.2 | 264.2  | 6959.0   |
| RJE | University Hospital Of North Staffordshire Hospital NHS Trust | 127581 | 119 | 322 | 13212 | 93.3  | 252.4  | 10355.7  |
| RM2 | University Hospital Of South Manchester NHS Foundation Trust  | 71403  | 37  | 90  | 6131  | 51.8  | 126.0  | 8586.4   |
| RKB | University Hospitals Coventry and Warwickshire NHS Trust      | 126537 | 119 | 231 | 8305  | 94.0  | 182.6  | 6563.3   |
| RA7 | University Hospitals Of Bristol NHS Foundation Trust          | 172827 | 116 | 256 | 9743  | 67.1  | 148.1  | 5637.4   |
| RWE | University Hospitals Of Leicester NHS Trust                   | 192382 | 120 | 277 | 9512  | 62.4  | 144.0  | 4944.3   |
| RTX | University Hospitals Of Morecambe Bay NHS Foundation Trust    | 68522  | 64  | 169 | 6775  | 93.4  | 246.6  | 9887.3   |
| RBK | Walsall Hospitals NHS Trust                                   | 55821  | 44  | 85  | 3039  | 78.8  | 152.3  | 5444.2   |
| RW  |                                                               |        |     |     |       |       |        |          |
| W   | Warrington and Halton Hospitals NHS Foundation Trust          | 61421  | 50  | 81  | 5048  | 81.4  | 131.9  | 8218.6   |
| RWG | West Hertfordshire Hospitals NHS Trust                        | 95384  | 51  | 109 | 5362  | 53.5  | 114.3  | 5621.5   |
| RFW | West Middlesex University NHS Trust                           | 63584  | 33  | 106 | 3098  | 51.9  | 166.7  | 4872.3   |
| RGR | West Suffolk Hospital NHS Trust                               | 56939  | 47  | 99  | 4007  | 82.5  | 173.9  | 7037.4   |
| RYR | Western Sussex Hospitals NHS Trust                            | 94045  | 67  | 166 | 7452  | 71.2  | 176.5  | 7923.9   |
| RA3 | Weston Area Health NHS Trust                                  | 13040  | 9   | 16  | 845   | 69.0  | 122.7  | 6479.8   |
| RKE | Whittington Hospital NHS Trust                                | 50647  | 28  | 59  | 3382  | 55.3  | 116.5  | 6677.6   |
| RBL | Wirral University Teaching Hospital NHS Foundation Trust      | 72140  | 49  | 173 | 5321  | 67.9  | 239.8  | 7375.9   |
| RWP | Worcestershire Acute Hospitals NHS Trust                      | 115581 | 70  | 167 | 7114  | 60.6  | 144.5  | 6155.0   |
| RRF | Wrightington, Wigan and Leigh NHS Foundation Trust            | 51486  | 49  | 108 | 3104  | 95.2  | 209.8  | 6028.8   |
| RA4 | Yeovil District Hospital NHS Foundation Trust                 | 35923  | 19  | 49  | 2182  | 52.9  | 136.4  | 6074.1   |
| RCB | York Hospitals NHS Trust                                      | 104298 | 107 | 187 | 7723  | 102.6 | 179.3  | 7404.7   |

## Appendix Table A5

### Proportion of all-cause paediatric care episodes with missing Lower Super Output Area (LSOA), English Hospital Episode Statistics, 2014/15

|                                                                 |     | Invalid | Valid | Total | Missing |
|-----------------------------------------------------------------|-----|---------|-------|-------|---------|
| Aintree University Hospitals NHS Foundation Trust               | REM | 7       | 708   | 715   | 1.0%    |
| Airedale NHS Foundation Trust                                   | RCF | 8       | 4128  | 4136  | 0.2%    |
| Alder Hey Childrens NHS Foundation Trust                        | RBS | 548     | 10429 | 10977 | 5.0%    |
| Ashford and St Peter's Hospitals NHS Foundation Trust           | RTK | 17      | 3425  | 3442  | 0.5%    |
| Barking, Havering and Redbridge University Hospitals NHS Trust  | RF4 | 63      | 7061  | 7124  | 0.9%    |
| Barnsley Dist Gen Hosp NHS Foundation Trust                     | RFF | 8       | 4690  | 4698  | 0.2%    |
| Barts Health NHS Trust                                          | R1H | 198     | 16161 | 16359 | 1.2%    |
| Basildon and Thurrock University Hospitals NHS Foundation Trust | RDD | 22      | 3265  | 3287  | 0.7%    |
| Basingstoke and North Hampshire Hospitals NHS Foundation Trust  | RN5 | 50      | 6349  | 6399  | 0.8%    |
| Bedford Hospital NHS Trust                                      | RC1 | 16      | 2796  | 2812  | 0.6%    |
| Birmingham Children's Hospital NHS Foundation Trust             | RQ3 | 56      | 13864 | 13920 | 0.4%    |
| Birmingham Heartlands and Solihull Trust                        | RR1 | 178     | 14008 | 14186 | 1.3%    |
| Blackpool Fylde and Wyre NHS Foundation Trust                   | RXL | 63      | 6562  | 6625  | 1.0%    |
| Bradford Teaching Hospitals NHS Foundation Trust                | RAE | 11      | 7878  | 7889  | 0.1%    |
| Brighton and Sussex University Hospitals NHS Trust              | RXH | 63      | 6378  | 6441  | 1.0%    |
| Buckinghamshire Healthcare NHS Trust                            | RXQ | 22      | 7699  | 7721  | 0.3%    |
| Burton Hospitals NHS Foundation Trust                           | RJF | 8       | 4629  | 4637  | 0.2%    |
| Calderdale and Huddersfield NHS Foundation Trust                | RWY | 11      | 7533  | 7544  | 0.1%    |
| Cambridge University Hospitals NHS Foundation Trust             | RGT | 69      | 5012  | 5081  | 1.4%    |
| Cambridgeshire Community Services NHS Trust                     | RYV | 9       | 3526  | 3535  | 0.3%    |
| Central Manchester University Hospitals NHS Foundation Trust    | RW3 | 192     | 15181 | 15373 | 1.2%    |
| Chelsea and Westminster Hospital NHS Foundation Trust           | RQM | 112     | 4264  | 4376  | 2.6%    |
| Chesterfield Royal Hospital NHS Foundation Trust                | RFS | 27      | 4487  | 4514  | 0.6%    |
| City Hospitals Sunderland NHS Foundation Trust                  | RLN | 55      | 5637  | 5692  | 1.0%    |
| Colchester Hospital University NHS Foundation Trust             | RDE | 22      | 7074  | 7096  | 0.3%    |
| Countess Of Chester Hospital NHS Foundation Trust               | RJR | 1049    | 3956  | 5005  | 21.0%   |
| County Durham and Darlington NHS Foundation Trust               | RXP | 37      | 11180 | 11217 | 0.3%    |
| Croydon Health Services NHS Trust                               | RJ6 | 481     | 4194  | 4675  | 10.3%   |
| Dartford and Gravesham NHS Trust                                | RN7 | 25      | 6426  | 6451  | 0.4%    |
| Derby Hospitals NHS Foundation Trust                            | RTG | 181     | 4166  | 4347  | 4.2%    |
| Doncaster and Bassetlaw Hospitals NHS Foundation Trust          | RP5 | 10      | 9623  | 9633  | 0.1%    |
| Dorset County Hospital NHS Foundation Trust                     | RBD | 15      | 2963  | 2978  | 0.5%    |
| East and North Hertfordshire NHS Trust                          | RWH | 25      | 7372  | 7397  | 0.3%    |
| East Cheshire NHS Trust                                         | RJN | -       | -     | 3179  | <0.1%   |
| East Kent Hospitals University NHS Foundation Trust             | RVV | 63      | 10829 | 10892 | 0.6%    |
| East Lancashire Hospitals NHS Trust                             | RXR | 15      | 13702 | 13717 | 0.1%    |
| East Sussex Hospitals NHS Trust                                 | RXC | 33      | 5951  | 5984  | 0.6%    |
| Epsom and St Helier University Hospitals NHS Trust              | RVR | 59      | 4658  | 4717  | 1.3%    |
| Frimley Park Hospital NHS Trust                                 | RDU | 34      | 13022 | 13056 | 0.3%    |
| Gateshead Health NHS Foundation Trust                           | RR7 | 17      | 3086  | 3103  | 0.5%    |

1  
2  
3  
4  
5  
6  
7  
8  
9  
10  
11  
12  
13  
14  
15  
16  
17  
18  
19  
20  
21  
22  
23  
24  
25  
26  
27  
28  
29  
30  
31  
32  
33  
34  
35  
36  
37  
38  
39  
40  
41  
42  
43  
44  
45  
46  
47  
48  
49  
50  
51  
52  
53  
54  
55  
56  
57  
58  
59  
60

|                                                               |     |     |       |       |       |
|---------------------------------------------------------------|-----|-----|-------|-------|-------|
| George Eliot Hospital NHS Trust                               | RLT | -   | -     | 1126  | <0.1% |
| Gloucestershire Hospitals NHS Foundation Trust                | RTE | 49  | 8193  | 8242  | 0.6%  |
| Great Ormond Street Hospital NHS Trust                        | RP4 | 216 | 612   | 828   | 26.1% |
| Great Western Hospitals NHS Foundation Trust                  | RN3 | 29  | 5800  | 5829  | 0.5%  |
| Guy's and St Thomas' NHS Foundation Trust                     | RJ1 | 122 | 4269  | 4391  | 2.8%  |
| Harrogate and District NHS Foundation Trust                   | RCD | 10  | 3300  | 3310  | 0.3%  |
| Hereford Hospitals NHS Trust                                  | RLQ | 347 | 3453  | 3800  | 9.1%  |
| Hinchingbrooke Healthcare NHS Trust                           | RQQ | -   | -     | 455   | <0.1% |
| Homerton University Hospital NHS Foundation Trust             | RQX | 15  | 2576  | 2591  | 0.6%  |
| Hull and East Yorkshire Hospitals NHS Trust                   | RWA | 19  | 7910  | 7929  | 0.2%  |
| Imperial College Healthcare NHS Trust                         | RYJ | 207 | 3837  | 4044  | 5.1%  |
| Ipswich Hospital NHS Trust                                    | RGQ | 30  | 5399  | 5429  | 0.6%  |
| Isle of wight NHS Trust                                       | R1F | 10  | 2323  | 2333  | 0.4%  |
| James Paget University Hospitals NHS Foundation Trust         | RGP | 10  | 2940  | 2950  | 0.3%  |
| Kettering General Hospital NHS Foundation Trust               | RNQ | -   | -     | 5229  | <0.1% |
| King's College Hospital NHS Foundation Trust                  | RJZ | 96  | 7895  | 7991  | 1.2%  |
| Kingston Hospital NHS Trust                                   | RAX | 49  | 3772  | 3821  | 1.3%  |
| Lancashire Teaching Hospitals NHS Trust                       | RXN | 58  | 8954  | 9012  | 0.6%  |
| Leeds Teaching Hospitals NHS Trust                            | RR8 | 36  | 9409  | 9445  | 0.4%  |
| London North West Healthcare NHS Trust                        | R1K | 69  | 8792  | 8861  | 0.8%  |
| Luton and Dunstable Hospital NHS Foundation Trust             | RC9 | 41  | 9123  | 9164  | 0.4%  |
| Maidstone and Tunbridge Wells NHS Trust                       | RWF | 16  | 4750  | 4766  | 0.3%  |
| Medway NHS Trust                                              | RPA | 34  | 8205  | 8239  | 0.4%  |
| Mid Essex Hospital Services NHS Trust                         | RQ8 | 33  | 5353  | 5386  | 0.6%  |
| Mid Staffordshire NHS Foundation Trust                        | RJD | 18  | 2616  | 2634  | 0.7%  |
| Mid Yorkshire Hospitals NHS Trust                             | RXF | 32  | 10681 | 10713 | 0.3%  |
| Milton Keynes Hospital NHS Foundation Trust                   | RD8 | 38  | 6523  | 6561  | 0.6%  |
| Newcastle Upon Tyne Hospitals NHS Foundation Trust            | RTD | 141 | 14332 | 14473 | 1.0%  |
| Norfolk and Norwich University Hospitals NHS Foundation Trust | RM1 | 25  | 8824  | 8849  | 0.3%  |
| North Bristol NHS Trust                                       | RVJ | 19  | 996   | 1015  | 1.9%  |
| North Cumbria University Hospitals NHS Trust                  | RNL | 159 | 5837  | 5996  | 2.7%  |
| North Lincolnshire and Goole Hosps NHS Foundation Trust       | RJL | 7   | 5531  | 5538  | 0.1%  |
| North Middlesex University Hospital NHS Trust                 | RAP | 58  | 7613  | 7671  | 0.8%  |
| North Tees and Hartlepool NHS Foundation Trust                | RVW | -   | -     | 5043  | <0.1% |
| Northampton General Hospital NHS Trust                        | RNS | 16  | 7594  | 7610  | 0.2%  |
| Northern Devon Healthcare NHS Trust                           | RBZ | 13  | 2528  | 2541  | 0.5%  |
| Northumbria Healthcare NHS Foundation Trust                   | RTF | 15  | 6137  | 6152  | 0.2%  |
| Nottingham University Hospitals NHS Trust                     | RX1 | 26  | 9005  | 9031  | 0.3%  |
| Oxford Radcliffe Hospital NHS Trust                           | RTH | 110 | 10408 | 10518 | 1.0%  |
| Pennine Acute Hospitals NHS Trust                             | RW6 | 41  | 17532 | 17573 | 0.2%  |
| Peterborough and Stamford Hospitals NHS Foundation Trust      | RGN | 17  | 6931  | 6948  | 0.2%  |
| Plymouth Hospitals NHS Trust                                  | RK9 | 16  | 7560  | 7576  | 0.2%  |
| Poole Hospital NHS Foundation Trust                           | RD3 | 67  | 8293  | 8360  | 0.8%  |
| Portsmouth Hospitals NHS Trust                                | RHU | 21  | 7075  | 7096  | 0.3%  |
| Princess Alexandra Hospital NHS Trust                         | RQW | 32  | 2770  | 2802  | 1.1%  |
| Queen Elizabeth Hospital Kings Lynn NHS Foundation Trust      | RCX | 9   | 4126  | 4135  | 0.2%  |
| Royal Berkshire Hospital NHS Foundation Trust                 | RHW | 73  | 5495  | 5568  | 1.3%  |
| Royal Bolton Hospital NHS Foundation Trust                    | RMC | 22  | 8272  | 8294  | 0.3%  |
| Royal Bournemouth and Christchurch Trust                      | RDZ | 34  | 479   | 513   | 6.6%  |

|    |                                                               |     |     |       |       |       |
|----|---------------------------------------------------------------|-----|-----|-------|-------|-------|
| 1  |                                                               |     |     |       |       |       |
| 2  |                                                               |     |     |       |       |       |
| 3  | Royal Cornwall Hospitals NHS Trust                            | REF | 55  | 6932  | 6987  | 0.8%  |
| 4  | Royal Devon and Exeter NHS Foundation Trust                   | RH8 | 39  | 6081  | 6120  | 0.6%  |
| 5  | Royal Free Hampstead NHS Trust                                | RAL | 116 | 8720  | 8836  | 1.3%  |
| 6  | Royal Liverpool Broadgreen Hospitals NHS Trust                | RQ6 | 19  | 857   | 876   | 2.2%  |
| 7  | Royal Surrey County NHS Foundation Trust                      | RA2 | 70  | 3659  | 3729  | 1.9%  |
| 8  | Royal United Hospital Bath NHS Trust                          | RD1 | 46  | 6146  | 6192  | 0.7%  |
| 9  | Royal Wolverhampton Hospital NHS Trust                        | RL4 | 36  | 8040  | 8076  | 0.4%  |
| 10 | Salford Royal NHS Foundation Trust                            | RM3 | 19  | 2939  | 2958  | 0.6%  |
| 11 | Salisbury NHS Foundation Trust                                | RNZ | 21  | 2359  | 2380  | 0.9%  |
| 12 | Sandwell and West Birmingham Hospitals NHS Trust              | RXK | 75  | 8955  | 9030  | 0.8%  |
| 13 | Sheffield Children's NHS Foundation Trust                     | RCU | 16  | 7095  | 7111  | 0.2%  |
| 14 | Sheffield Teaching Hospitals NHS Foundation Trust             | RHQ | -   | -     | 1438  | <0.1% |
| 15 | Sherwood Forest Hospitals NHS Foundation Trust                | RK5 | 39  | 5065  | 5104  | 0.8%  |
| 16 | Shrewsbury and Telford Hospital NHS Trust                     | RXW | 731 | 7873  | 8604  | 8.5%  |
| 17 | South Devon Health Care NHS Trust                             | RA9 | 36  | 3242  | 3278  | 1.1%  |
| 18 | South Tees Hospitals NHS Foundation Trust                     | RTR | 36  | 10272 | 10308 | 0.3%  |
| 19 | South Tyneside NHS Foundation Trust                           | RE9 | -   | -     | 1628  | <0.1% |
| 20 | South Warwickshire NHS Foundation Trust                       | RJC | 330 | 3488  | 3818  | 8.6%  |
| 21 | Southampton University Hospitals NHS Trust                    | RHM | 97  | 10154 | 10251 | 0.9%  |
| 22 | Southend University Hospitals NHS Foundation Trust            | RAJ | 13  | 2857  | 2870  | 0.5%  |
| 23 | Southport and Ormskirk Hospital NHS Trust                     | RVY | 33  | 4397  | 4430  | 0.7%  |
| 24 | St George's Healthcare NHS Trust                              | RJ7 | 79  | 7366  | 7445  | 1.1%  |
| 25 | St Helens and Knowsley Hospitals NHS Trust                    | RBN | 53  | 6657  | 6710  | 0.8%  |
| 26 | Stockport NHS Foundation Trust                                | RWJ | 13  | 5540  | 5553  | 0.2%  |
| 27 | Surrey and Sussex Healthcare NHS Trust                        | RTP | 64  | 4040  | 4104  | 1.6%  |
| 28 | Tameside Hospital NHS Foundation Trust                        | RMP | 33  | 4815  | 4848  | 0.7%  |
| 29 | Taunton and Somerset NHS Foundation Trust                     | RBA | 44  | 4730  | 4774  | 0.9%  |
| 30 | The Dudley Group Of Hospitals NHS Foundation Trust            | RNA | 11  | 6993  | 7004  | 0.2%  |
| 31 | The Hillingdon Hospital NHS Trust                             | RAS | 65  | 4475  | 4540  | 1.4%  |
| 32 | The Lewisham Healthcare NHS Trust                             | RJ2 | 601 | 11875 | 12476 | 4.8%  |
| 33 | The Mid Cheshire Hospitals NHS Trust                          | RBT | 27  | 5159  | 5186  | 0.5%  |
| 34 | The Rotherham NHS Foundation Trust                            | RFR | -   | -     | 3967  | <0.1% |
| 35 | The Walton Centre NHS Foundation Trust                        | RET | 7   | 34    | 41    | 17.1% |
| 36 | United Lincolnshire Hospitals NHS Trust                       | RWD | 77  | 8350  | 8427  | 0.9%  |
| 37 | University College London Hospitals NHS Foundation Trust      | RRV | 124 | 2406  | 2530  | 4.9%  |
| 38 | University Hospital Birmingham NHS Foundation Trust           | RRK | 16  | 788   | 804   | 2.0%  |
| 39 | University Hospital Of North Staffordshire Hospital NHS Trust | RJE | 42  | 13351 | 13393 | 0.3%  |
| 40 | University Hospital Of South Manchester NHS Foundation Trust  | RM2 | 32  | 6607  | 6639  | 0.5%  |
| 41 | University Hospitals Coventry and Warwickshire NHS Trust      | RKB | 39  | 8421  | 8460  | 0.5%  |
| 42 | University Hospitals Of Bristol NHS Foundation Trust          | RA7 | 120 | 9975  | 10095 | 1.2%  |
| 43 | University Hospitals Of Leicester NHS Trust                   | RWE | 403 | 9514  | 9917  | 4.1%  |
| 44 | University Hospitals Of Morecambe Bay NHS Foundation Trust    | RTX | 62  | 6775  | 6837  | 0.9%  |
| 45 | Walsall Hospitals NHS Trust                                   | RBK | 13  | 3350  | 3363  | 0.4%  |
| 46 | Warrington and Halton Hospitals NHS Foundation Trust          | RWW | 60  | 5048  | 5108  | 1.2%  |
| 47 | West Hertfordshire Hospitals NHS Trust                        | RWG | 29  | 5521  | 5550  | 0.5%  |
| 48 | West Middlesex University NHS Trust                           | RFW | 34  | 3098  | 3132  | 1.1%  |
| 49 | West Suffolk Hospital NHS Trust                               | RGR | 25  | 4007  | 4032  | 0.6%  |
| 50 | Western Sussex Hospitals NHS Trust                            | RYR | 35  | 7452  | 7487  | 0.5%  |
| 51 | Weston Area Health NHS Trust                                  | RA3 | 17  | 852   | 869   | 2.0%  |
| 52 |                                                               |     |     |       |       |       |
| 53 |                                                               |     |     |       |       |       |
| 54 |                                                               |     |     |       |       |       |
| 55 |                                                               |     |     |       |       |       |
| 56 |                                                               |     |     |       |       |       |
| 57 |                                                               |     |     |       |       |       |
| 58 |                                                               |     |     |       |       |       |
| 59 |                                                               |     |     |       |       |       |
| 60 |                                                               |     |     |       |       |       |

|                                                          |     |       |        |        |      |
|----------------------------------------------------------|-----|-------|--------|--------|------|
| Whittington Hospital NHS Trust                           | RKE | 9     | 3518   | 3527   | 0.3% |
| Wirral University Teaching Hospital NHS Foundation Trust | RBL | 97    | 6643   | 6740   | 1.4% |
| Worcestershire Acute Hospitals NHS Trust                 | RWP | 24    | 7270   | 7294   | 0.3% |
| Wrightington, Wigan and Leigh NHS Foundation Trust       | RRF | 8     | 3106   | 3114   | 0.3% |
| Yeovil District Hospital NHS Foundation Trust            | RA4 | 24    | 2182   | 2206   | 1.1% |
| York Hospitals NHS Trust                                 | RCB | 66    | 7723   | 7789   | 0.8% |
| Total                                                    |     | 10564 | 854667 | 887296 | 1.2% |

Notes. Where 5 or fewer invalid cases, number is suppressed

For peer review only



1STROBE 2007 (v4) Statement—Checklist of items that should be included in reports of *cross-sectional studies*

| Section/Topic             | Item # | Recommendation                                                                                                                                                                       | Reported on page # |
|---------------------------|--------|--------------------------------------------------------------------------------------------------------------------------------------------------------------------------------------|--------------------|
| Title and abstract        | 1      | (a) Indicate the study’s design with a commonly used term in the title or the abstract                                                                                               | 1                  |
|                           |        | (b) Provide in the abstract an informative and balanced summary of what was done and what was found                                                                                  | 1-2                |
| <b>Introduction</b>       |        |                                                                                                                                                                                      |                    |
| Background/rationale      | 2      | Explain the scientific background and rationale for the investigation being reported                                                                                                 | 4                  |
| Objectives                | 3      | State specific objectives, including any prespecified hypotheses                                                                                                                     | 5                  |
| <b>Methods</b>            |        |                                                                                                                                                                                      |                    |
| Study design              | 4      | Present key elements of study design early in the paper                                                                                                                              | 5-7                |
| Setting                   | 5      | Describe the setting, locations, and relevant dates, including periods of recruitment, exposure, follow-up, and data collection                                                      | 5                  |
| Participants              | 6      | (a) Give the eligibility criteria, and the sources and methods of selection of participants                                                                                          | 5-6                |
| Variables                 | 7      | Clearly define all outcomes, exposures, predictors, potential confounders, and effect modifiers. Give diagnostic criteria, if applicable                                             | 5-7                |
| Data sources/ measurement | 8*     | For each variable of interest, give sources of data and details of methods of assessment (measurement). Describe comparability of assessment methods if there is more than one group | 5                  |
| Bias                      | 9      | Describe any efforts to address potential sources of bias                                                                                                                            | 7-8                |
| Study size                | 10     | Explain how the study size was arrived at                                                                                                                                            | 5                  |
| Quantitative variables    | 11     | Explain how quantitative variables were handled in the analyses. If applicable, describe which groupings were chosen and why                                                         | N/A                |
| Statistical methods       | 12     | (a) Describe all statistical methods, including those used to control for confounding                                                                                                | 6-8                |
|                           |        | (b) Describe any methods used to examine subgroups and interactions                                                                                                                  | N/A                |
|                           |        | (c) Explain how missing data were addressed                                                                                                                                          | 7-8                |
|                           |        | (d) If applicable, describe analytical methods taking account of sampling strategy                                                                                                   | N/A                |
|                           |        | (e) Describe any sensitivity analyses                                                                                                                                                | N/A                |
| <b>Results</b>            |        |                                                                                                                                                                                      |                    |

|                          |     |                                                                                                                                                                                                              |                         |
|--------------------------|-----|--------------------------------------------------------------------------------------------------------------------------------------------------------------------------------------------------------------|-------------------------|
| Participants             | 13* | (a) Report numbers of individuals at each stage of study—eg numbers potentially eligible, examined for eligibility, confirmed eligible, included in the study, completing follow-up, and analysed            | 9                       |
|                          |     | (b) Give reasons for non-participation at each stage                                                                                                                                                         | N/A                     |
|                          |     | (c) Consider use of a flow diagram                                                                                                                                                                           | N/A                     |
| Descriptive data         | 14* | (a) Give characteristics of study participants (eg demographic, clinical, social) and information on exposures and potential confounders                                                                     | N/A                     |
|                          |     | (b) Indicate number of participants with missing data for each variable of interest                                                                                                                          | 8 (+ Appendix Table A5) |
| Outcome data             | 15* | Report numbers of outcome events or summary measures                                                                                                                                                         | 9-10                    |
| Main results             | 16  | (a) Give unadjusted estimates and, if applicable, confounder-adjusted estimates and their precision (eg, 95% confidence interval). Make clear which confounders were adjusted for and why they were included | 9-11                    |
|                          |     | (b) Report category boundaries when continuous variables were categorized                                                                                                                                    | N/A                     |
|                          |     | (c) If relevant, consider translating estimates of relative risk into absolute risk for a meaningful time period                                                                                             | N/A                     |
| Other analyses           | 17  | Report other analyses done—eg analyses of subgroups and interactions, and sensitivity analyses                                                                                                               | N/A                     |
| <b>Discussion</b>        |     |                                                                                                                                                                                                              |                         |
| Key results              | 18  | Summarise key results with reference to study objectives                                                                                                                                                     | 11                      |
| Limitations              | 19  | Discuss limitations of the study, taking into account sources of potential bias or imprecision. Discuss both direction and magnitude of any potential bias                                                   | 11-12                   |
| Interpretation           | 20  | Give a cautious overall interpretation of results considering objectives, limitations, multiplicity of analyses, results from similar studies, and other relevant evidence                                   | 12-13                   |
| Generalisability         | 21  | Discuss the generalisability (external validity) of the study results                                                                                                                                        | 13                      |
| <b>Other information</b> |     |                                                                                                                                                                                                              |                         |
| Funding                  | 22  | Give the source of funding and the role of the funders for the present study and, if applicable, for the original study on which the present article is based                                                | 15                      |

\*Give information separately for cases and controls in case-control studies and, if applicable, for exposed and unexposed groups in cohort and cross-sectional studies.

**Note:** An Explanation and Elaboration article discusses each checklist item and gives methodological background and published examples of transparent reporting. The STROBE checklist is best used in conjunction with this article (freely available on the Web sites of PLoS Medicine at <http://www.plosmedicine.org/>, Annals of Internal Medicine at <http://www.annals.org/>, and Epidemiology at <http://www.epidem.com/>). Information on the STROBE Initiative is available at [www.strobe-statement.org](http://www.strobe-statement.org).

# BMJ Open

## Use of age-specific hospital catchment populations to investigate geographical variation in inpatient admissions for children and young people in England: retrospective, cross-sectional study.

|                                 |                                                                                                                                                                                                                                                                                                                                                                                                                                          |
|---------------------------------|------------------------------------------------------------------------------------------------------------------------------------------------------------------------------------------------------------------------------------------------------------------------------------------------------------------------------------------------------------------------------------------------------------------------------------------|
| Journal:                        | <i>BMJ Open</i>                                                                                                                                                                                                                                                                                                                                                                                                                          |
| Manuscript ID                   | bmjopen-2018-022339.R1                                                                                                                                                                                                                                                                                                                                                                                                                   |
| Article Type:                   | Research                                                                                                                                                                                                                                                                                                                                                                                                                                 |
| Date Submitted by the Author:   | 27-Apr-2018                                                                                                                                                                                                                                                                                                                                                                                                                              |
| Complete List of Authors:       | Arora, Sandeepa; Nuffield Trust; Imperial College London School of Public Health<br>Cheung, R; Department of Paediatrics, St Thomas' Hospital; Public Health England Child and Maternal Health Intelligence Network<br>Sherlaw-Johnson, Christopher; Nuffield Trust<br>Hargreaves, Dougal; University College London Great Ormond Street Institute of Child Health Library, Population, Policy & Practice Programme; The Nuffield Trust, |
| <b>Primary Subject Heading</b>: | Health services research                                                                                                                                                                                                                                                                                                                                                                                                                 |
| Secondary Subject Heading:      | Paediatrics                                                                                                                                                                                                                                                                                                                                                                                                                              |
| Keywords:                       | Variation, PAEDIATRICS, Children and young people, Health services research, Hospital catchment population                                                                                                                                                                                                                                                                                                                               |
|                                 |                                                                                                                                                                                                                                                                                                                                                                                                                                          |

SCHOLARONE™  
Manuscripts

1  
2  
3 **Use of age-specific hospital catchment populations to investigate geographical variation in**  
4 **inpatient admissions for children and young people in England: retrospective, cross-**  
5 **sectional study.**  
6  
7  
8

9  
10 Sandeepa Arora<sup>1,2</sup> (s.arora@imperial.ac.uk)

11  
12 C. Ronny Cheung<sup>3,4</sup>, (crcheung@gmail.com)

13  
14 Chris Sherlaw-Johnson<sup>1</sup> (christopher.sherlaw-johnson@nuffieldtrust.org.uk)

15  
16 Dougal S. Hargreaves<sup>1,5\*</sup> ([d.hargreaves@ucl.ac.uk](mailto:d.hargreaves@ucl.ac.uk))  
17  
18  
19

20 <sup>1</sup>The Nuffield Trust

21  
22 <sup>2</sup>Imperial College London.

23  
24 <sup>3</sup>Evelina London Children's Hospital

25  
26 <sup>4</sup>Public Health England Child and Maternal Health Intelligence Network

27  
28 <sup>5</sup>UCL Great Ormond Street Institute of Child Health  
29  
30  
31

32 **\*Corresponding author.**

33  
34 Dr Dougal S. Hargreaves.

35  
36 Population, Policy and Practice Programme,

37  
38 UCL Great Ormond Street Institute of Child Health

39  
40 30 Guilford Street

41  
42 London

43  
44 WC1N 1EH

45  
46 d.hargreaves@ucl.ac.uk  
47

48 **Word count: 3112**  
49  
50  
51  
52  
53  
54  
55  
56  
57

1  
2  
3 **Key words:**

4 Variation

5  
6 Paediatrics

7  
8 Children and young people

9  
10 Health services research

11  
12 Hospital catchment population

13  
14  
15  
16  
17  
18  
19  
20  
21  
22  
23  
24  
25  
26  
27  
28  
29  
30  
31  
32  
33  
34  
35  
36  
37  
38  
39  
40  
41  
42  
43  
44  
45  
46  
47  
48  
49  
50  
51  
52  
53  
54  
55  
56  
57  
58  
59  
60

For peer review only

**ABSTRACT****Objectives**

- To develop a method for calculating age-specific hospital catchment populations for children and young people (CYP) in England.
- To show how these methods allow geographical variation in hospital activity to be investigated and addressed more effectively.

**Design**

Retrospective, secondary analysis of existing national datasets.

**Setting**

Inpatient care of children and young people (0-18 years) in England

**Participants**

Hospital Episode Statistics (HES) data were accessed for all inpatient admissions (elective and emergency) for CYP from birth to 18 years, 364 days, for 2011/12 – 2014/15. In 2014/15, 857112 admissions were analysed, from an eligible population of approximately 11.9 million CYP.

**Outcome measures**

For each hospital Trust, the catchment population of CYP was calculated; Trust-level admission rates per thousand per year were then calculated for admissions due to

- Any diagnostic code
- Primary diagnosis of epilepsy
- Epilepsy listed as primary diagnosis or comorbidity

**Results**

1  
2  
3 Estimated 2014/15 hospital catchment populations for CYP ranged from 268,558 for Barts Health  
4  
5 NHS Trust to around 30,000 for the smallest acute general paediatric services and below 10,000 for  
6  
7 many Trusts providing specialist services. As expected, the composition of HCPs was fairly consistent  
8  
9 for age breakdown but levels of deprivation varied widely.  
10

11  
12 After standardising for population characteristics, admission rates with a primary diagnosis of  
13  
14 epilepsy ranged from 14.3 to 157.7 per 100,000 per year (11.0-fold variation) for Trusts providing  
15  
16 acute general paediatric services. All-cause admission rates showed less variation, ranging from 4033  
17  
18 to 11681 per 100,000 per year (2.9-fold variation).  
19

## 20 21 **Conclusions**

22  
23  
24 Use of age-specific catchment populations allows variation in hospital activity to be linked to specific  
25  
26 teams and care pathways. This provides an evidence base for initiatives to tackle unwarranted  
27  
28 variation in healthcare activity and health outcomes.  
29

## Article Summary

### Strengths and limitations of this study

- We adapt methodology for estimating hospital catchment populations, which has been validated and used extensively by Public Health England for adult and all-age populations.
- A strength of this study is the use of Hospital Episode Statistics, which contain high-quality data on the vast majority of hospital care for children and young people in England.
- Another strength is the ability to standardise for population differences, including age, sex and deprivation, so that fair comparisons can be made between services.
- Although there were very low levels of missing postcode overall (1.2%), a small number of Trusts reported missing postcode data on over 5% of patients, meaning that the catchment populations for these Trusts should be interpreted with caution.



## Background

In 2012, the Chief Medical Officer expressed concern about the poor health outcomes experienced by children and young people (CYP) in England compared to other West European countries. She argued that one key route to improving these outcomes would be through understanding and addressing the wide geographical variation in health services and outcomes within England.(1) More recent evidence shows that this variation persists – for example, the rates of hospital admission for elective tonsillectomy in CYP by Clinical Commissioning Groups ranged from 84 to 485 per 100,000 population (5.7-fold variation) while asthma admission rates varied from 60 to 639 per 100,000 population (10.6-fold variation).(2) However, with some exceptions, greater awareness has not resulted in effective action to tackle geographical variation, and there has been limited research to understand the causes of variation.

One important limitation of previous work has been that geographical analysis of healthcare activity has been restricted to Clinical Commissioning Groups (CCGs) or Local Authority areas (LAs). These geographical areas are defined by their responsibility for commissioning services within their designated population, whereas provision of most health services is by individual NHS Trust. Each area is often served by many different NHS Trusts, preventing variation being attributed to specific hospital services. A second important limitation has often been the inability of policy makers and researchers to adjust for population risk (i.e. to understand the proportion of variation that can be accounted for by population differences).

In the US, hospital service areas allow analysis of health outcomes in the population served by specific hospital or networks.(3) In the UK, a number of different methods have been used to calculate hospital catchment populations (HCPs) for adults, (15) of which the most widely used is the proportionate flow method used by Public Health England (PHE).(4, 5) However, the marked differences in referral pathways, clinical networks and hospital activity between paediatric and adult services limits the application of published catchment populations to study variation in CYP.

1  
2  
3 This article describes how we adapted the use of PHE methods to calculate age-specific hospital  
4 catchment populations for paediatric services, both unadjusted and adjusted for population  
5 characteristics (sex, age, deprivation). These represent estimates of the number of CYP who would  
6 have been admitted to each Trust had they needed hospital care, disaggregated by age, sex and  
7 deprivation. We analyse data on epilepsy admissions as a practical example to illustrate how these  
8 methods may be useful to guide commissioning, operational and policy decisions. Potential  
9 application of these methods to other conditions is also discussed.  
10  
11  
12  
13  
14  
15  
16  
17  
18  
19  
20

## 21 **Methods**

### 22 *Data*

23  
24  
25  
26  
27 Hospital Episode Statistics (HES) data(6) were accessed for all inpatient admissions (elective and  
28 emergency) for children and young people from birth to 18 years, 364 days, for 2011/12 – 2014/15.

29  
30  
31 For each admission, we analysed:

- 32  
33  
34 • geographic data on the admitting NHS Trust and the Lower Layer Super Output Area  
35 (LSOA).(7) These are the smallest geographical unit for which Census data are available and  
36 can be derived from the patient's postcode;
- 37  
38 • sociodemographic data on sex, age (by single year). Adjustment for these variables is needed  
39 as inpatient activity during childhood is known to vary markedly with age and between  
40 males and females;(8)
- 41  
42 • ICD10 codes of the primary diagnosis and any secondary diagnoses. For the second set of  
43 analyses, we focused on admissions for epilepsy (ICD10 codes G40, G41)
- 44  
45  
46  
47  
48  
49

50  
51  
52 HES data were then linked to Office of National Statistics (ONS) data on Index of Multiple  
53 Deprivation (IMD) and the CYP population within each LSOA,(9) disaggregated by single year of age  
54 and sex (based on ONS 2012 mid-year estimates by age, sex).  
55  
56  
57

Note that the term ‘hospital catchment population’ (HCP) refers to the catchment population of an NHS Trust – an administrative unit that may include more than one hospital site. We retained the term hospital catchment population as the term NHS Trust is not widely understood, especially by readers who are not familiar with the English NHS.

#### *Derivation of hospital catchment populations*

Derivation involved 5 steps – described below.

1. HES data were used to count the number of patients in each age and sex group admitted from each LSOA to
  - a) any provider (NHS Trust) and
  - b) each individual provider.

HESIDs (unique patient identifiers within the HES data) were used to ensure that each patient was only counted once; if a patient had multiple admissions while living at the same address, we selected only the first admission.

2. Within each age and sex group, we calculated the proportion of patients from each Lower Layer Super Output Area (LSOA) that was admitted by each provider, as a proportion of patients who used any provider.

For band  $i$  (age and sex), LSOA  $j$ , the number admitted to provider  $a$  is denoted by  $m_{iaj}$ . The total number admitted by LSOA and band  $i$  for each year is denoted by  $\sum_b m_{ibj}$  then,

$$p_{iaj} = \frac{m_{iaj}}{\sum_b m_{ibj}}$$

Where  $p_{iaj}$  represents the proportion of patients that went to each provider.

3. For each LSOA, this proportion was multiplied by the LSOA resident population in that age-sex group  $N_{ij}$  to give the LSOA catchment population for each provider  $n_{iaj}$ .

The catchment population of provider  $a$  for band  $i$  (age and sex) is then:

$$n_{iaj} = p_{iaj}N_{ij}$$

4. The provider-specific catchment populations for each LSOA were summed to give the total catchment population for that provider.

Thus, the total catchment population  $C$  for provider  $a$ , band  $i$  (age and sex):

$$C_{ia} = \sum_j n_{iaj}$$

5. Adding in information on IMD decile, the total catchment population for provider  $a$ , band  $i$  (age and sex), IMD  $D$  is:

$$C_{iaD} = \sum_j n_{iaj}\delta_{Dd(j)}$$

Where

$$\delta_{Dd(j)} = \begin{cases} 1 & \text{if } d(j) = D \\ 0 & \text{otherwise} \end{cases}$$

Notes:

We excluded patients with missing or invalid age at start of episodes (<0.1%) or with no valid English LSOA (1.2% of episodes; median proportion of episodes at Trust level = 0.6%). Nine Trusts (6.2%) had missing LSOA data on >5% of episodes (range 5.1% to 26.1%), reflecting either a high proportion of patients who live in Wales or incomplete coding. These Trusts are identified in Table 1 & 2 and their estimated HCPs should be interpreted with caution. See Appendix Table A1 for further details.

1  
2  
3 Some patients moved residence during the analysis period and had admissions to the same Trust  
4 from different postcodes of residence. We counted these patients once in each LSOA. Significant  
5 numbers of patients are treated in a region other than their region of residence and catchment areas  
6 of Trusts therefore cross regional boundaries.  
7  
8  
9

#### 10 11 12 13 14 *Use of hospital catchment populations to investigate variation in epilepsy admission rates for CYP.*

15  
16  
17 In order to illustrate the use of hospital catchment populations, we calculated unadjusted and  
18 adjusted admission rates for all-cause and epilepsy admissions per thousand CYP. The median,  
19 interquartile range, range and ratio of highest: lowest Trust-level admission rates were calculated.  
20  
21 Following previous studies(2), we then re-calculated the range and ratio of highest:lowest admission  
22 rates excluding the 5 highest and 5 lowest Trusts. This is a form of sensitivity analyses that is  
23 recommended in order to minimise distortion from a small number of outliers in the reliability of  
24 diagnostic coding.  
25  
26  
27  
28  
29  
30

31  
32  
33 Next, the ratio of observed versus expected admissions were calculated for each Trust. To do this,  
34 the expected admission rates for each Trust (unadjusted) were calculated by multiplying the national  
35 epilepsy admission rate per thousand CYP by the total catchment population for that Trust. The  
36 adjusted values for expected admission rates used a similar approach, based on the national  
37 epilepsy admission rate per thousand and the Trust catchment population within each age-sex-IMD  
38 group. The expected total number of admissions for each Trust was the sum of expected admissions  
39 within each age-sex-IMD group.  
40  
41  
42  
43  
44  
45  
46

47  
48 In each case, we then derived the ratio of observed versus expected epilepsy admissions,  
49 highlighting those Trusts with admission rates that differed by more than 2 or 3 standard deviations  
50 from the expected rate for the population served.  
51  
52  
53  
54  
55  
56  
57

1  
2  
3 All analyses were performed using SAS. No ethical approval was needed for these secondary  
4 analyses of anonymised, routinely-collected data.  
5  
6

### 7 *Patient involvement*

8  
9 Concerns about geographical variation in the quality, accessibility and capacity of NHS services for  
10 children and young people have been raised repeatedly in consultations in CYP and families.(1) No  
11 patients or families were directly involved in designing or performing these analyses.  
12  
13  
14  
15

## 16 **Results**

17  
18  
19  
20 In 2014/15, 857,112 admissions were analysed, from an eligible population of approximately 11.9  
21 million CYP. The Trust serving the largest number of CYP was Barts Health NHS Trust, with an  
22 estimated paediatric Hospital Catchment Population (HCP) of 268,558, compared to the national  
23 median HCP of 71,379. Sixteen Trusts had estimated catchment populations of <10,000. This may  
24 reflect the fact that they provide specialist services (e.g. Great Ormond Street Hospital, Papworth  
25 Hospital NHS Foundation Trust); or that only specific groups of CYP are admitted (for example,  
26 inpatient care for new born babies, or young people (usually aged 16 or over) who were admitted  
27 under the care of adult specialists (e.g. Birmingham Women's NHS Foundation Trust, Liverpool  
28 Women's Hospital NHS Trust). The smallest catchment populations for Trusts providing acute  
29 general paediatric services were around thirty thousand (e.g. Northern Devon Healthcare NHS Trust  
30 = 34,821 Sheffield Teaching Hospitals NHS Foundation Trust = 27,899).  
31  
32  
33  
34  
35  
36  
37  
38  
39  
40  
41  
42  
43  
44  
45

46 Table 1 presents the standardised HCPs for each NHS Trust in London where CYP were admitted.

47 These data illustrate the impact of reconfiguration and mergers of Trusts during the period 2011/12  
48 to 2014/15 on the HCP for each Trust. For example, London North West Healthcare NHS Trust was  
49 newly formed in 2014, and took on the workload of North West London Hospitals NHS Trust.  
50  
51  
52  
53

54 Similarly, Barnet and Chase Farm Hospitals NHS Trust merged with the Royal Free Hospital in 2014,  
55  
56  
57

1  
2  
3 with the result that much of Barnet's HCP was transferred across to the HCP of Royal Free Hospital.  
4  
5 Standardised HCPs for all NHS Trusts in England are shown in Appendix Table A2.  
6

7  
8 Appendix Table A3 presents the HCPs for each Trust in England where CYP were admitted in  
9  
10 2013/14, disaggregated by IMD quintile. In four cases, greater than 60% of the CYP population  
11  
12 served by a Trust lived in the most deprived quintile of areas (Homerton University Hospital NHS  
13  
14 Foundation Trust (77.4%); Sandwell and West Birmingham Hospitals NHS Trust (65.0%), Royal  
15  
16 Liverpool Broadgreen Hospitals NHS Trust (62.7%), Barts Health NHS Trust (60.4%). In contrast, two  
17  
18 Trusts served a population where more than 60% lived in the least deprived quintile: Frimley Park  
19  
20 Hospital NHS Trust (61.1%), Royal Surrey County NHS Foundation Trust (60.3%).  
21

22  
23 The age breakdown varied much less between Trusts. The proportion of all 0-18s who were in the 0-  
24  
25 3 age band varied from 27.9% in Chelsea & Westminster Hospital NHS Foundation Trust, to 19.2% at  
26  
27 the Robert Jones and Agnes Hunt Orthopaedic Trust. See Appendix Table A4.  
28

29  
30 Excluding Trusts that do not provide acute general paediatrics services (see explanation above),  
31  
32 standardised admission rates with a primary diagnosis of epilepsy ranged from 14.3 to 157.7 per  
33  
34 100,000 per year (11.0-fold variation). The median value was 71.3 per 100 000, with an interquartile  
35  
36 range from 55.8 to 90.3. Excluding the five Trusts with the highest and lowest admission rates, the  
37  
38 range reduced to 30.9 to 124.9 vs. 30.9 per 100,000 per year (4.0-fold variation). All-cause admission  
39  
40 rates showed much less variation, with all-cause admissions in Trusts providing acute paediatric  
41  
42 services ranging from 4033 to 11681 per 100,000 per year (2.9-fold variation), with a median of  
43  
44 7,130 and an interquartile range from to 5,890 to 8,390 per 10,000 per year. Excluding the highest  
45  
46 and lowest five, the range was from 4439 to 10,200 to 4439 per 10,000 per year (2.3-fold variation).  
47  
48 Moderate agreement was observed between all-cause and epilepsy-specific admission rates ( $r^2 =$   
49  
50 0.25).  
51  
52  
53  
54  
55  
56  
57  
58  
59  
60

1  
2  
3 In Figure 1, unadjusted and adjusted epilepsy admission rates for each Trust are presented. This  
4  
5 Figure illustrates, firstly, that relatively little of the observed variation can be explained by random  
6  
7 chance among relatively small units; secondly, it shows that only a small degree of the observed  
8  
9 variation can be explained by differences in the age, sex and deprivation of the population served by  
10  
11 each Trust.  
12

### 13 14 **Discussion**

15  
16  
17 This study demonstrates the feasibility of estimating age-specific catchment populations for Trusts  
18  
19 within the English NHS. We then show two ways in which these findings may be applied to inform  
20  
21 planning of health services, and support quality improvement activities and research. First, we  
22  
23 illustrate how catchment populations in London have changed following recent mergers and other  
24  
25 service reconfigurations. Second, we use the catchment populations to calculate admission rates per  
26  
27 100 000 CYP for each NHS Trust. These data show that admission rates vary 11-fold between Trusts  
28  
29 providing acute general paediatric services for epilepsy admissions (4 fold when excluding extremes)  
30  
31 and 2.9-fold (2.3-fold) for all-cause admissions in this age group.  
32

33  
34 Strengths of this study are the use of robust methodology for estimating hospital catchment  
35  
36 populations, which has been validated and used extensively by Public Health England for adult and  
37  
38 all-age populations. Another strength of the study is the quality and completeness of Hospital  
39  
40 Episode Statistics, which are subject to extensive cleaning and quality assurance processes, and  
41  
42 cover 98-99% all hospital care in England.(10, 11) This includes the vast majority of healthcare  
43  
44 provided for CYP resident in the UK, making HES data the largest unified dataset of its kind in the  
45  
46 world. These data may be particularly useful in performing national-level analyses of variation,  
47  
48 where chance findings of very high or low admission rates due to small numbers of patients with a  
49  
50 particular condition attending a specific hospital are likely to even out. Another strength is the ability  
51  
52 to adjust or standardise for population differences, including age, sex and deprivation, so that fair  
53  
54 comparisons can be made between services.  
55  
56  
57



1  
2  
3 One important limitation of this study is that in order to maximise data in each LSOA (median CYP  
4 population is approximately 300), all inpatient activity within this age group is included. Our model  
5 does not account of the fact that parents or CYP who live a similar distance from two hospitals might  
6 (for example) choose to attend Hospital A if their child needed elective surgery by an Ear, Nose and  
7 Throat surgeon but attend Hospital B for acute abdominal pain. In adult populations, there is some  
8 evidence that patients are willing to travel further to access elective care compared to emergency  
9 care.<sup>(12)</sup> As noted above, caution must be used in interpreting results for any specific hospital,  
10 especially when looking at single conditions affecting a relatively small number of patients. Another  
11 caveat is that these data will be most useful in comparing like with like – for example, all District  
12 General Hospitals providing acute general paediatric care, or all tertiary children’s hospitals. As  
13 illustrated in Table 2 and Appendix Table A4, calculated admission rates for specialist hospitals, or  
14 those only providing care for neonates or CYP over the age of 16, may be very high or very low  
15 compared to those of general hospitals. Finally, for the small number of hospitals where postcode  
16 information is less than 95% complete, the HCPs and admission rates should be interpreted with  
17 caution (see Methods section and Appendix Table A5 for further details).

18  
19  
20  
21  
22  
23  
24  
25  
26  
27  
28  
29  
30  
31  
32  
33  
34  
35 To our knowledge, this study is the first to report hospital catchment populations for paediatric care  
36 in England. Previous studies in adult populations and other countries have described a range of  
37 methods for estimating catchment populations, including proportionate flow or Norris-Bailey  
38 methods (as used in this study),<sup>(5)</sup> k-means clustering of multivariate data,<sup>(13)</sup> kernel analyses,  
39 (14) and ‘de facto service areas’ in which the population of each LSOA is allocated to the catchment  
40 population of a single hospital using a Bayesian approach.<sup>(15)</sup> Advanced versions of these  
41 techniques are being increasingly used to study variation in preventable hospitalisations.<sup>(16, 17)</sup>  
42  
43  
44  
45  
46  
47  
48  
49  
50  
51  
52  
53  
54  
55  
56  
57  
58  
59  
60  
Further research using different methodological approaches to calculate HCPs for CYP would be a  
useful way to investigate the robustness of our model, and may allow clearer ways of presenting  
maps of HCPs.

1  
2  
3 The most useful approaches to do this are likely to be based on further analyses of HES data.  
4  
5 Compared to hospital catchment populations based on survey data (as reported in early studies of  
6  
7 geographical variation)(18) use of HES data has the advantage of being efficient (as it is based on  
8  
9 existing, routinely-collected data that have already been extensively cleaned and quality assured),  
10  
11 robust (as it uses data collected at the time of use, rather than being based on retrospective  
12  
13 patient/family recall or on hypothetical questions about where care would be accessed if needed in  
14  
15 the future) and has high levels of completeness (as it is not limited by survey response rate).  
16

17  
18 As in adult populations, we believe that age-specific hospital catchment populations for CYP will  
19  
20 provide a useful evidence base to support operational decisions, quality improvement work and  
21  
22 future research related to hospital services.(19) For example, data used to calculate each catchment  
23  
24 population can be used to create a detailed map (for example, a choropleth map) of all CYP served  
25  
26 by any hospital. As well as tracking changes in the HCP following reconfiguration (as shown in Table  
27  
28 1), in the future HCP mapping data could be used to model the impact of service reconfiguration and  
29  
30 merger plans, so reducing the uncertainty and disruption to services that often occurs at present.  
31

32  
33 Regarding quality improvement projects, existing indicators are often published at Local Authority  
34  
35 level, across a population that may be served by many different hospitals. Previous research has  
36  
37 shown that indicators mapped directly to specific clinical teams promote clinical engagement and  
38  
39 accountability.(20) Further, they can identify specific strengths or weaknesses of individual services  
40  
41 and so inform tailored quality improvement initiatives. Lastly, HCPs have potential to open up  
42  
43 exciting new avenues of research within paediatric services. For example, the national clinical audit  
44  
45 for paediatric epilepsy (Epilepsy12) has collected detailed information on paediatric epilepsy services  
46  
47 in England since 2011, but to date it has not been possible to link these data to admission rates, due  
48  
49 to lack of an appropriate denominator. Such linkage would allow robust investigation of the impact  
50  
51 on improving performance in different aspects of epilepsy care on unit-level admission rates (i.e. the  
52  
53 degree to which performance in the Epilepsy12 audit accounts for the unexplained variation shown  
54  
55 in Figure 1). Similarly, attempts to study and reduce geographical variation by specialist networks  
56  
57

1  
2  
3 such as those for paediatric surgery or gastroenterology services have been limited by lack of  
4  
5 appropriate denominator data. HCPs will allow admission and activity rates to be compared between  
6  
7 areas and facilitate study of unmet need and/or overuse of admissions or procedures.  
8  
9  
10  
11

## 12 **Conclusions**

13  
14  
15 This paper presents a method for calculating hospital catchment populations for the care of children  
16  
17 and young people in the English NHS. We then show how this method allows comparison of  
18  
19 paediatric admission rates between hospitals, adjusting for population characteristics including sex,  
20  
21 age, and deprivation. Lastly, we illustrate how these adjusted admission rates may be useful for the  
22  
23 purposes of commissioning and improving services, as well as for quality improvement and research  
24  
25 activities.  
26  
27  
28  
29  
30  
31  
32  
33  
34  
35  
36  
37  
38  
39  
40  
41  
42  
43  
44  
45  
46  
47  
48  
49  
50  
51  
52  
53  
54  
55  
56  
57  
58  
59  
60

**Figure legend**

Figure 1. Funnel plot showing ratio of observed: expected paediatric epilepsy admissions in English Hospital Trusts, 2014/15

**Funding statement**

This work was supported by The Health Foundation (Improvement Science Fellowship to DH; award Reference Number 7383).

**Competing interest statement**

We declare no competing interests.

**Author contributions**

SA, CSJ, RC and DSH were involved in the design of this study and in revising the manuscript. SA and CSJ performed all analyses. SA and DSH wrote the first draft of the manuscript.

**Data sharing statement**

SAS code used for all analyses is available from the authors on request.

## References

1. Davies SC. Our children deserve better: Prevention pays. Annual report of the Chief Medical Officer 2012. . London; 2013. .
2. RightCare. NHS Atlas of Variation of Variation in Healthcare. 2015.
3. The\_Dartmouth\_Atlas\_of\_Healthcare. Research Methods.
4. Perry J. Hospital Trust Catchment populations: A denominator to support commissioning decisions through understanding the population likely to draw on a hospital's services. ePoster Library of PHE. 2017;186476.
5. Brown P, Ho D, Shaw ME, Verne J, Trotter CL. Estimating catchment populations in the South West: why and how. UK Public Health Association Annual Conference, Telford2006.
6. Hospital Episode Statistics [Available from: <http://content.digital.nhs.uk/hes> (accessed 20th December 2017).
7. Lower Layer Super Output Areas (LSOAs) [Available from: <https://data.gov.uk/dataset/lower-layer-super-output-areas-lsoas> (accessed 20th December 2017).
8. Hargreaves DS, Viner RM. Adolescent inpatient activity 1999–2010: analysis of English Hospital Episode Statistics data. Archives of Disease in Childhood. 2014;99(9):830-3.
9. English Indices of Deprivation 2015 [Available from: <https://www.gov.uk/government/statistics/english-indices-of-deprivation-2015> (accessed 20th December 2017).
10. Herbert A, Wijlaars L, Zylbersztejn A, Cromwell D, Hardelid P. Data Resource Profile: Hospital Episode Statistics Admitted Patient Care (HES APC). International Journal of Epidemiology. 2017;46(4):1093-i.
11. National\_Audit\_Office. Healthcare Across the UK: A Comparison of the NHS in England, Scotland, Wales and Northern Ireland . 2012. . 2012.
12. Propper C, Damiani M, Leckie G, Dixon J. Impact of patients' socioeconomic status on the distance travelled for hospital admission in the English National Health Service. Journal of health services research & policy. 2007;12(3):153-9.
13. Gilmour SJ. Identification of hospital catchment areas using clustering: an example from the NHS. Health services research. 2010;45(2):497-513.
14. Sofianopoulou E, Rushton S, Rubin G, Pless-Mulloli T. Defining GP practice areas based on true service utilisation. Health & place. 2012;18(6):1248-54.
15. McPherson D. Avoidable harm, unwarranted variation and diffusion in the treatment of acute myocardial infarction. 2015.
16. Falster MO, Jorm LR, Leyland AH. Using Weighted Hospital Service Area Networks to Explore Variation in Preventable Hospitalization. Health services research.0(0).
17. O’Cathain A, Knowles E, Maheswaran R, Turner J, Hirst E, Goodacre S, et al. Hospital characteristics affecting potentially avoidable emergency admissions: National ecological study. Health Services Management Research. 2013;26(4):110-8.
18. Wennberg J, McPherson K, Goodman D. Small Area Analysis and the Challenge of Practice Variation. In: Johnson A, Stukel T, editors. Medical Practice Variations. Boston, MA: Springer US; 2016. p. 1-25.
19. Wennberg JE. Time to tackle unwarranted variations in practice. BMJ. 2011;342.
20. NHS National Quality Board [Available from: <https://www.england.nhs.uk/ourwork/part-rel/ngb/> (accessed 14.8.17).

**Table 1. Paediatric Hospital Catchment Populations in London by year, standardised for age, sex and deprivation**

| Trust code | Trust name                                                    | Region                   | Catchment populations, standardised for age, sex, Index of Multiple Deprivation |         |         |         |
|------------|---------------------------------------------------------------|--------------------------|---------------------------------------------------------------------------------|---------|---------|---------|
|            |                                                               |                          | 2011/12                                                                         | 2012/13 | 2013/14 | 2014/15 |
|            |                                                               |                          |                                                                                 |         |         |         |
| RKB        | University Hospitals Coventry and Warwickshire NHS Trust      | West Midlands            | 116,634                                                                         | 116,159 | 126,521 | 126,537 |
| RTD        | Newcastle Upon Tyne Hospitals NHS Foundation Trust            | North East               | 117,233                                                                         | 117,214 | 121,658 | 124,257 |
| RHM        | Southampton University Hospitals NHS Trust                    | South Central            | 134,343                                                                         | 115,636 | 117,210 | 120,636 |
| RTE        | Gloucestershire Hospitals NHS Foundation Trust                | South West               | 120,471                                                                         | 120,927 | 120,459 | 119,516 |
| RHU        | Portsmouth Hospitals NHS Trust                                | South Central            | 126,870                                                                         | 123,691 | 124,823 | 118,416 |
| RM1        | Norfolk and Norwich University Hospitals NHS Foundation Trust | East of England          | 116,286                                                                         | 114,535 | 114,161 | 118,394 |
| RJ7        | St George's Healthcare NHS Trust                              | London                   | 103,559                                                                         | 109,089 | 113,127 | 118,041 |
| RXR        | East Lancashire Hospitals NHS Trust                           | North West               | 116,271                                                                         | 119,014 | 118,240 | 117,300 |
| RWP        | Worcestershire Acute Hospitals NHS Trust                      | West Midlands            | 120,307                                                                         | 118,484 | 117,303 | 115,581 |
| RWD        | United Lincolnshire Hospitals NHS Trust                       | East Midlands            | 118,708                                                                         | 115,559 | 115,924 | 112,401 |
| RAE        | Bradford Teaching Hospitals NHS Foundation Trust              | Yorkshire and The Humber | 113,843                                                                         | 114,617 | 111,292 | 111,030 |
| RXP        | County Durham and Darlington NHS Foundation Trust             | North East               | 107,566                                                                         | 108,332 | 107,119 | 108,941 |
| RWA        | Hull and East Yorkshire Hospitals NHS Trust                   | Yorkshire and The Humber | 105,424                                                                         | 106,722 | 106,685 | 106,281 |
| RXH        | Brighton and Sussex University Hospitals NHS Trust            | South East Coast         | 95,573                                                                          | 99,438  | 103,746 | 105,282 |

|     |                                                                |                          |         |         |         |         |
|-----|----------------------------------------------------------------|--------------------------|---------|---------|---------|---------|
| RWH | East and North Hertfordshire NHS Trust                         | East of England          | 110,674 | 104,026 | 106,784 | 105,074 |
| RWF | Maidstone and Tunbridge Wells NHS Trust                        | South East Coast         | 105,941 | 102,464 | 103,455 | 104,481 |
| RCB | York Hospitals NHS Trust                                       | Yorkshire and The Humber | 70,501  | 105,737 | 103,237 | 104,298 |
| RXW | Shrewsbury and Telford Hospital NHS Trust                      | West Midlands            | 100,221 | 101,232 | 100,641 | 102,368 |
| RCU | Sheffield Children's NHS Foundation Trust                      | Yorkshire and The Humber | 115,371 | 116,009 | 117,548 | 102,197 |
| RTG | Derby Hospitals NHS Foundation Trust                           | East Midlands            | 101,760 | 103,757 | 104,768 | 101,709 |
| RHW | Royal Berkshire Hospital NHS Foundation Trust                  | South Central            | 107,907 | 103,139 | 101,569 | 100,771 |
| RQ8 | Mid Essex Hospital Services NHS Trust                          | East of England          | 120,888 | 107,718 | 101,410 | 100,503 |
| RP5 | Doncaster and Bassetlaw Hospitals NHS Foundation Trust         | Yorkshire and The Humber | 102,095 | 100,803 | 98,480  | 100,244 |
| RXK | Sandwell and West Birmingham Hospitals NHS Trust               | West Midlands            | 94,462  | 94,120  | 98,396  | 100,183 |
| RXQ | Buckinghamshire Healthcare NHS Trust                           | South Central            | 102,622 | 99,708  | 96,197  | 99,550  |
| RN5 | Basingstoke and North Hampshire Hospitals NHS Foundation Trust | South Central            | 85,695  | 102,867 | 101,435 | 99,421  |
| RTR | South Tees Hospitals NHS Foundation Trust                      | North East               | 97,604  | 97,851  | 97,981  | 98,197  |
| RD3 | Poole Hospital NHS Foundation Trust                            | South West               | 100,557 | 97,418  | 97,080  | 97,422  |

#### Notes.

1. Hospital Catchment Populations are estimated based on the proportion of children and young people ( $\leq 18$  years) from each Lower Super Output Area (LSOA) who attend each NHS Trust in any given year for planned or unplanned care. See Methods section for full details.
2. Although all Trust are presented for completeness, the catchment population is more meaningful and useful when applied to Trusts that provide general paediatric services than to specialist Trusts (for example, Moorfields Eye Hospital, Great Ormond Street Hospital, The Royal Marsden Hospital, The Royal National Orthopaedic Hospital).

- 1
  - 2
  - 3
  - 4
  - 5
  - 6
  - 7
  - 8
  - 9
  - 10
  - 11
  - 12
  - 13
  - 14
  - 15
  - 16
  - 17
  - 18
  - 19
  - 20
  - 21
  - 22
  - 23
  - 24
  - 25
  - 26
  - 27
  - 28
  - 29
  - 30
  - 31
  - 32
  - 33
  - 34
  - 35
  - 36
  - 37
  - 38
  - 39
  - 40
  - 41
  - 42
  - 43
  - 44
  - 45
  - 46
  - 47
  - 48
  - 49
  - 50
  - 51
  - 52
  - 53
  - 54
  - 55
  - 56
  - 57
  - 58
  - 59
  - 60
3. Where large changes occur between years, this typically reflects mergers or reconfiguration. For example, during the study period, Barnet and Chase Farm Hospitals NHS Trust merged with Royal Free Hampstead NHS Trust and there was extensive reconfiguration of services in North West London (North-West London Hospitals NHS Trust, Ealing Hospital NHS Trust and London North West Healthcare NHS Trust).
4. \*denotes Trusts where LSOA data are missing on  $\geq 5.0\%$  of hospital admissions (meaning that the catchment populations should be interpreted with more caution). The exact proportion of admissions with missing LSOA data in each Trust are presented in Appendix Table A5.

For peer review only



**Table 2. Paediatric admission rates by Trust for primary diagnosis epilepsy, any diagnosis epilepsy, all-cause admissions, per 100,000, 2014/15, England.**

|                                                                | Primary diagnosis epilepsy | Any epilepsy diagnosis | All-cause admission |
|----------------------------------------------------------------|----------------------------|------------------------|---------------------|
| The Walton Centre NHS Foundation Trust                         | 355.7                      | 1067.1                 | 12094.0             |
| Great Ormond Street Hospital NHS Trust                         | 256.6                      | 513.1                  | 9813.4              |
| Royal Wolverhampton Hospital NHS Trust                         | 157.7                      | 305.3                  | 10141.8             |
| Newcastle Upon Tyne Hospitals NHS Foundation Trust             | 152.1                      | 379.9                  | 11426.3             |
| Milton Keynes Hospital NHS Foundation Trust                    | 144.0                      | 328.8                  | 9422.8              |
| Burton Hospitals NHS Foundation Trust                          | 143.0                      | 255.0                  | 7519.6              |
| Birmingham Children's Hospital NHS Foundation Trust            | 129.6                      | 325.0                  | 8589.4              |
| Medway NHS Trust                                               | 124.9                      | 266.2                  | 8812.1              |
| East Cheshire NHS Trust                                        | 122.5                      | 284.0                  | 8843.7              |
| North Lincolnshire and Goole Hosps NHS Foundation Trust        | 114.4                      | 231.0                  | 6257.7              |
| East Sussex Hospitals NHS Trust                                | 113.1                      | 182.5                  | 8106.3              |
| South Tees Hospitals NHS Foundation Trust                      | 112.0                      | 297.4                  | 10096.1             |
| Guy's and St Thomas' NHS Foundation Trust                      | 109.4                      | 218.8                  | 6577.6              |
| Hereford Hospitals NHS Trust                                   | 107.3                      | 199.3                  | 8188.1              |
| Kettering General Hospital NHS Foundation Trust                | 106.8                      | 195.7                  | 7749.6              |
| Hull and East Yorkshire Hospitals NHS Trust                    | 105.4                      | 216.4                  | 6017.1              |
| Blackpool Fylde and Wyre NHS Foundation Trust                  | 104.3                      | 258.3                  | 10864.7             |
| York Hospitals NHS Trust                                       | 102.6                      | 179.3                  | 7404.7              |
| Isle of Wight NHS Trust                                        | 100.3                      | 183.2                  | 8031.5              |
| University Hospital Birmingham NHS Foundation Trust            | 100.2                      | 264.2                  | 6959.0              |
| Northampton General Hospital NHS Trust                         | 99.8                       | 261.9                  | 9309.2              |
| The Mid Cheshire Hospitals NHS Trust                           | 98.8                       | 259.3                  | 7949.0              |
| Barnsley Dist Gen Hosp NHS Foundation Trust                    | 98.2                       | 196.4                  | 8854.7              |
| Basingstoke and North Hampshire Hospitals NHS Foundation Trust | 97.6                       | 180.0                  | 6316.6              |
| Queen Elizabeth Hospital Kings Lynn NHS Foundation Trust       | 96.4                       | 251.1                  | 9249.2              |
| Southampton University Hospitals NHS Trust                     | 96.2                       | 190.7                  | 8404.6              |
| Wrightington, Wigan and Leigh NHS Foundation Trust             | 95.2                       | 209.8                  | 6028.8              |
| Colchester Hospital University NHS Foundation Trust            | 94.6                       | 269.2                  | 9264.7              |
| University Hospitals Coventry and Warwickshire NHS Trust       | 94.0                       | 182.6                  | 6563.3              |
| University Hospitals Of Morecambe Bay NHS Foundation Trust     | 93.4                       | 246.6                  | 9887.3              |
| University Hospital Of North Staffordshire Hospital NHS Trust  | 93.3                       | 252.4                  | 10355.7             |
| Stockport NHS Foundation Trust                                 | 92.8                       | 174.6                  | 8713.0              |
| Chesterfield Royal Hospital NHS Foundation Trust               | 91.9                       | 187.3                  | 7895.4              |
| County Durham and Darlington NHS Foundation Trust              | 91.8                       | 221.2                  | 10262.4             |
| Salford Royal NHS Foundation Trust                             | 91.5                       | 142.9                  | 8400.8              |
| North Cumbria University Hospitals NHS Trust                   | 91.4                       | 173.8                  | 8744.8              |
| Royal Berkshire Hospital NHS Foundation Trust                  | 91.3                       | 164.7                  | 5453.0              |
| Tameside Hospital NHS Foundation Trust                         | 90.3                       | 199.1                  | 9045.9              |
| Calderdale and Huddersfield NHS Foundation Trust               | 88.8                       | 186.0                  | 7870.2              |
| East and North Hertfordshire NHS Trust                         | 88.5                       | 147.5                  | 6795.2              |
| Royal Devon and Exeter NHS Foundation Trust                    | 86.8                       | 190.2                  | 7764.1              |
| Royal Cornwall Hospitals NHS Trust                             | 86.2                       | 183.2                  | 7558.5              |
| Central Manchester University Hospitals NHS Foundation Trust   | 85.6                       | 256.1                  | 10200.2             |
| Homerton University Hospital NHS Foundation Trust              | 85.1                       | 137.8                  | 5221.7              |
| South Warwickshire NHS Foundation Trust                        | 83.6                       | 173.7                  | 7465.3              |
| Norfolk and Norwich University Hospitals NHS Foundation Trust  | 83.6                       | 213.7                  | 7320.5              |
| Portsmouth Hospitals NHS Trust                                 | 83.6                       | 167.2                  | 5949.4              |
| King's College Hospital NHS Foundation Trust                   | 83.2                       | 132.5                  | 5246.2              |
| Plymouth Hospitals NHS Trust                                   | 83.1                       | 174.8                  | 7607.1              |
| West Suffolk Hospital NHS Trust                                | 82.5                       | 173.9                  | 7037.4              |
| Northumbria Healthcare NHS Foundation Trust                    | 82.5                       | 165.1                  | 8390.3              |

|    |                                                                 |      |       |         |
|----|-----------------------------------------------------------------|------|-------|---------|
| 1  |                                                                 |      |       |         |
| 2  |                                                                 |      |       |         |
| 3  | Luton and Dunstable Hospital NHS Foundation Trust               | 82.0 | 195.2 | 8913.8  |
| 4  | Taunton and Somerset NHS Foundation Trust                       | 81.7 | 202.7 | 7129.9  |
| 5  | Warrington and Halton Hospitals NHS Foundation Trust            | 81.4 | 131.9 | 8218.6  |
| 6  | Peterborough and Stamford Hospitals NHS Foundation Trust        | 80.7 | 225.6 | 8728.8  |
| 7  | Pennine Acute Hospitals NHS Trust                               | 80.5 | 196.2 | 10147.4 |
| 8  | North Tees and Hartlepool NHS Foundation Trust                  | 80.2 | 217.8 | 8251.5  |
| 9  | Walsall Hospitals NHS Trust                                     | 78.8 | 152.3 | 5444.2  |
| 10 | North Middlesex University Hospital NHS Trust                   | 78.0 | 145.6 | 7918.9  |
| 11 | City Hospitals Sunderland NHS Foundation Trust                  | 77.0 | 191.7 | 8367.6  |
| 12 | The Hillingdon Hospital NHS Trust                               | 76.7 | 162.6 | 6857.8  |
| 13 | Frimley Park Hospital NHS Trust                                 | 75.8 | 158.4 | 6851.2  |
| 14 | South Devon Health Care NHS Trust                               | 75.1 | 181.9 | 5448.0  |
| 15 | East Kent Hospitals University NHS Foundation Trust             | 74.7 | 166.2 | 7619.1  |
| 16 | East Lancashire Hospitals NHS Trust                             | 74.2 | 277.9 | 11681.2 |
| 17 | Bradford Teaching Hospitals NHS Foundation Trust                | 73.9 | 222.5 | 6588.3  |
| 18 | Nottingham University Hospitals NHS Trust                       | 73.0 | 159.4 | 5107.2  |
| 19 | Doncaster and Bassetlaw Hospitals NHS Foundation Trust          | 72.8 | 142.7 | 9385.1  |
| 20 | Basildon and Thurrock University Hospitals NHS Foundation Trust | 72.3 | 117.4 | 4185.1  |
| 21 | Sandwell and West Birmingham Hospitals NHS Trust                | 71.9 | 160.7 | 8798.9  |
| 22 | Bedford Hospital NHS Trust                                      | 71.8 | 168.3 | 5739.2  |
| 23 | Sheffield Children's NHS Foundation Trust                       | 71.4 | 203.5 | 6942.5  |
| 24 | Airedale NHS Foundation Trust                                   | 71.3 | 329.1 | 9150.7  |
| 25 | Western Sussex Hospitals NHS Trust                              | 71.2 | 176.5 | 7923.9  |
| 26 | Imperial College Healthcare NHS Trust                           | 71.2 | 146.3 | 4707.7  |
| 27 | Birmingham Heartlands and Solihull Trust                        | 70.5 | 140.5 | 7708.0  |
| 28 | Mid Yorkshire Hospitals NHS Trust                               | 70.2 | 155.4 | 7419.2  |
| 29 | Royal Bolton Hospital NHS Foundation Trust                      | 70.0 | 179.1 | 8819.4  |
| 30 | Dartford and Gravesham NHS Trust                                | 69.4 | 149.2 | 7885.0  |
| 31 | Barts Health NHS Trust                                          | 69.3 | 149.3 | 5890.0  |
| 32 | Southport and Ormskirk Hospital NHS Trust                       | 69.2 | 132.7 | 8094.0  |
| 33 | Weston Area Health NHS Trust                                    | 69.0 | 122.7 | 6479.8  |
| 34 | Poole Hospital NHS Foundation Trust                             | 68.8 | 256.6 | 8106.0  |
| 35 | Royal United Hospital Bath NHS Trust                            | 68.5 | 193.4 | 6530.5  |
| 36 | Wirral University Teaching Hospital NHS Foundation Trust        | 67.9 | 239.8 | 7375.9  |
| 37 | University Hospitals Of Bristol NHS Foundation Trust            | 67.1 | 148.1 | 5637.4  |
| 38 | Ashford and St Peter's Hospitals NHS Foundation Trust           | 67.1 | 107.4 | 5105.2  |
| 39 | Shrewsbury and Telford Hospital NHS Trust                       | 66.4 | 162.2 | 7580.5  |
| 40 | James Paget University Hospitals NHS Foundation Trust           | 66.1 | 116.3 | 6048.3  |
| 41 | The Lewisham Healthcare NHS Trust                               | 65.9 | 136.5 | 7769.5  |
| 42 | Lancashire Teaching Hospitals NHS Trust                         | 63.8 | 171.9 | 10193.4 |
| 43 | Epsom and St Helier University Hospitals NHS Trust              | 63.0 | 178.4 | 5285.4  |
| 44 | St George's Healthcare NHS Trust                                | 62.7 | 127.1 | 5969.1  |
| 45 | Cambridgeshire Community Services NHS Trust                     | 62.5 | 185.0 | 9188.9  |
| 46 | Royal Free Hampstead NHS Trust                                  | 62.5 | 136.0 | 5601.1  |
| 47 | University Hospitals Of Leicester NHS Trust                     | 62.4 | 144.0 | 4944.3  |
| 48 | Cambridge University Hospitals NHS Foundation Trust             | 61.3 | 197.6 | 5058.8  |
| 49 | Maidstone and Tunbridge Wells NHS Trust                         | 61.3 | 93.8  | 4536.7  |
| 50 | Worcestershire Acute Hospitals NHS Trust                        | 60.6 | 144.5 | 6155.0  |
| 51 | Ipswich Hospital NHS Trust                                      | 60.2 | 176.5 | 6566.3  |
| 52 | Leeds Teaching Hospitals NHS Trust                              | 60.1 | 165.8 | 6160.5  |
| 53 | Hinchingbrooke Healthcare NHS Trust                             | 59.4 | 89.0  | 6738.0  |
| 54 | Oxford Radcliffe Hospital NHS Trust                             | 58.5 | 156.0 | 6662.5  |
| 55 | Countess Of Chester Hospital NHS Foundation Trust               | 57.9 | 157.4 | 9156.6  |
| 56 | Dorset County Hospital NHS Foundation Trust                     | 56.8 | 144.5 | 6294.7  |
| 57 | The Dudley Group Of Hospitals NHS Foundation Trust              | 56.4 | 143.6 | 8559.8  |
| 58 | Gloucestershire Hospitals NHS Foundation Trust                  | 56.1 | 164.8 | 6854.3  |
| 59 | London North West Healthcare NHS Trust                          | 55.8 | 124.8 | 5098.4  |
| 60 | Whittington Hospital NHS Trust                                  | 55.3 | 116.5 | 6677.6  |
|    | The Rotherham NHS Foundation Trust                              | 55.2 | 154.1 | 7337.8  |
|    | Royal Surrey County NHS Foundation Trust                        | 54.7 | 106.4 | 5398.3  |
|    | Derby Hospitals NHS Foundation Trust                            | 54.1 | 115.0 | 4096.0  |
|    | West Hertfordshire Hospitals NHS Trust                          | 53.5 | 114.3 | 5621.5  |

1

2

3

4

5

6

7

8

9

10

11

12

13

14

15

16

17

18

19

20

21

22

23

24

25

26

27

28

29

30

31

32

33

34

35

36

37

38

39

40

41

42

43

44

45

46

47

48

49

50

51

52

53

54

55

56

57

58

59

60

|                                                                |      |        |          |
|----------------------------------------------------------------|------|--------|----------|
| United Lincolnshire Hospitals NHS Trust                        | 53.4 | 182.4  | 6992.8   |
| Buckinghamshire Healthcare NHS Trust                           | 53.2 | 137.6  | 7632.4   |
| Croydon Health Services NHS Trust                              | 53.1 | 73.9   | 5373.3   |
| Yeovil District Hospital NHS Foundation Trust                  | 52.9 | 136.4  | 6074.1   |
| West Middlesex University NHS Trust                            | 51.9 | 166.7  | 4872.3   |
| University Hospital Of South Manchester NHS Foundation Trust   | 51.8 | 126.0  | 8586.4   |
| South Tyneside NHS Foundation Trust                            | 50.8 | 88.9   | 6751.4   |
| Royal Bournemouth and Christchurch Trust                       | 49.9 | 99.9   | 7041.3   |
| Great Western Hospitals NHS Foundation Trust                   | 49.9 | 141.2  | 7058.8   |
| Barking, Havering and Redbridge University Hospitals NHS Trust | 46.8 | 93.6   | 4662.0   |
| Mid Staffordshire NHS Foundation Trust                         | 45.7 | 99.1   | 9815.2   |
| Alder Hey Childrens NHS Foundation Trust                       | 45.4 | 188.4  | 7766.6   |
| Princess Alexandra Hospital NHS Trust                          | 45.2 | 85.6   | 4438.7   |
| Gateshead Health NHS Foundation Trust                          | 43.5 | 81.5   | 8388.4   |
| Surrey and Sussex Healthcare NHS Trust                         | 43.1 | 108.8  | 4767.3   |
| St Helens and Knowsley Hospitals NHS Trust                     | 41.2 | 126.5  | 9790.2   |
| Northern Devon Healthcare NHS Trust                            | 40.2 | 158.0  | 7260.0   |
| Southend University Hospitals NHS Foundation Trust             | 37.9 | 116.6  | 4292.9   |
| Brighton and Sussex University Hospitals NHS Trust             | 37.0 | 115.9  | 5926.0   |
| Kingston Hospital NHS Trust                                    | 36.9 | 98.0   | 5332.2   |
| Mid Essex Hospital Services NHS Trust                          | 36.8 | 86.6   | 5326.2   |
| Sherwood Forest Hospitals NHS Foundation Trust                 | 36.7 | 138.5  | 6892.1   |
| Salisbury NHS Foundation Trust                                 | 35.7 | 109.1  | 4912.0   |
| Chelsea and Westminster Hospital NHS Foundation Trust          | 34.7 | 65.9   | 4932.9   |
| North Bristol NHS Trust                                        | 30.9 | 87.5   | 5016.8   |
| Harrogate and District NHS Foundation Trust                    | 29.6 | 96.2   | 7761.3   |
| University College London Hospitals NHS Foundation Trust       | 28.5 | 54.6   | 4032.6   |
| Aintree University Hospitals NHS Foundation Trust              | 27.7 | 73.7   | 6240.5   |
| Royal Liverpool Broadgreen Hospitals NHS Trust                 | 24.8 | 74.3   | 5871.3   |
| Sheffield Teaching Hospitals NHS Foundation Trust              | 14.3 | 28.7   | 4752.9   |
| George Eliot Hospital NHS Trust                                | 5.2  | 20.6   | 5717.0   |
| The Royal Marsden NHS Foundation Trust                         | 0.0  | 963.5  | 104056.3 |
| Liverpool Heart and Chest NHS Foundation Trust                 | 0.0  | 0.0    | 29608.9  |
| Christie Hospital NHS Trust                                    | 0.0  | 0.0    | 26449.3  |
| Papworth Hospital NHS Foundation Trust                         | 0.0  | 1444.5 | 21666.9  |
| Clatterbridge Centre For Oncology NHS Foundation Trust         | 0.0  | 0.0    | 15534.8  |
| The Royal National Orthopaedic Hospital NHS Trust              | 0.0  | 489.4  | 11500.7  |
| Royal Brompton and Harefield NHS Foundation Trust              | 0.0  | 153.9  | 8131.0   |
| Liverpool Womens Hospital NHS Trust                            | 0.0  | 0.0    | 6464.3   |
| Royal Orthopaedic Hospital NHS Foundation Trust                | 0.0  | 246.8  | 6170.2   |
| Moorfields Eye Hospital NHS Foundation Trust                   | 0.0  | 0.0    | 5217.1   |
| Birmingham Women's NHS Foundation Trust                        | 0.0  | 0.0    | 4659.7   |
| Robert Jones and Agnes Hunt Orthopaedic NHS Trust              | 0.0  | 0.0    | 4316.4   |
| Queen Victoria Hospital NHS Foundation Trust                   | 0.0  | 24.3   | 4251.8   |

\*denotes Trusts where Lower Layer Super Output Area (LSOA) data are missing on  $\geq 5.0\%$  of hospital admissions (meaning that the catchment populations and admission rates should be interpreted with more caution). The exact proportion of admissions with missing LSOA data by Trust are presented in Appendix Table A5.

1  
2  
3  
4  
5  
6  
7  
8  
9  
10  
11  
12  
13  
14  
15  
16  
17  
18  
19  
20  
21  
22  
23  
24  
25  
26  
27  
28  
29  
30  
31  
32  
33  
34  
35  
36  
37  
38  
39  
40  
41  
42  
43  
44  
45  
46  
47  
48  
49  
50  
51  
52  
53  
54  
55  
56  
57  
58  
59  
60

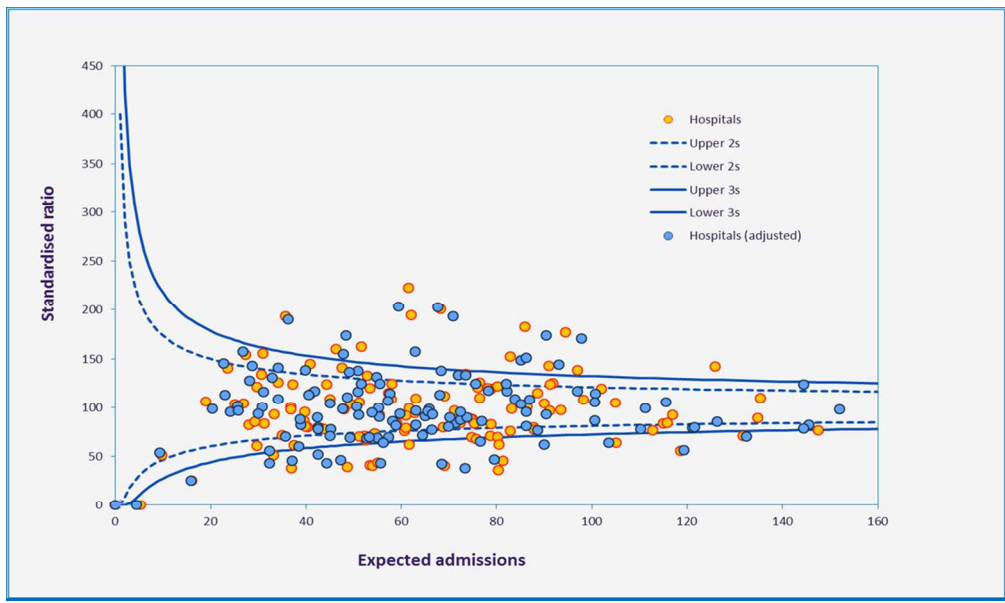

Figure 1. Funnel plot showing ratio of observed: expected paediatric epilepsy admissions in English Hospital Trusts, 2014/15.

**Appendix Table A1**  
**Proportion of all-cause paediatric care episodes with missing Lower Super Output Area (LSOA), English Hospital Episode Statistics, 2014/15**

|                                                                  |     | Invalid | Valid | Total |       |
|------------------------------------------------------------------|-----|---------|-------|-------|-------|
| Aintree University Hospitals NHS Foundation Trust                | REM | 7       | 708   | 715   | 1.0%  |
| Airedale NHS Foundation Trust                                    | RCF | 8       | 4128  | 4136  | 0.2%  |
| Alder Hey Childrens NHS Foundation Trust                         | RBS | 548     | 10429 | 10977 | 5.0%  |
| Ashford and St Peter's Hospitals NHS Foundation Trust            | RTK | 17      | 3425  | 3442  | 0.5%  |
| Barking, Havering and Redbridge University Hospitals NHS Trust   | RF4 | 63      | 7061  | 7124  | 0.9%  |
| Barnsley Dist Gen Hosp NHS Foundation Trust                      | RFF | 8       | 4690  | 4698  | 0.2%  |
| Barts Health NHS Trust                                           | R1H | 198     | 16161 | 16359 | 1.2%  |
| Basilston and Thurrock University Hospitals NHS Foundation Trust | RDD | 22      | 3265  | 3287  | 0.7%  |
| Basingstoke and North Hampshire Hospitals NHS Foundation Trust   | RN5 | 50      | 6349  | 6399  | 0.8%  |
| Bedford Hospital NHS Trust                                       | RC1 | 16      | 2796  | 2812  | 0.6%  |
| Birmingham Children's Hospital NHS Foundation Trust              | RQ3 | 56      | 13864 | 13920 | 0.4%  |
| Birmingham Heartlands and Solihull Trust                         | RR1 | 178     | 14008 | 14186 | 1.3%  |
| Blackpool Fylde and Wyre NHS Foundation Trust                    | RXL | 63      | 6562  | 6625  | 1.0%  |
| Bradford Teaching Hospitals NHS Foundation Trust                 | RAE | 11      | 7878  | 7889  | 0.1%  |
| Brighton and Sussex University Hospitals NHS Trust               | RXH | 63      | 6378  | 6441  | 1.0%  |
| Buckinghamshire Healthcare NHS Trust                             | RXQ | 22      | 7699  | 7721  | 0.3%  |
| Burton Hospitals NHS Foundation Trust                            | RJF | 8       | 4629  | 4637  | 0.2%  |
| Calderdale and Huddersfield NHS Foundation Trust                 | RWY | 11      | 7533  | 7544  | 0.1%  |
| Cambridge University Hospitals NHS Foundation Trust              | RGT | 69      | 5012  | 5081  | 1.4%  |
| Cambridgeshire Community Services NHS Trust                      | RYV | 9       | 3526  | 3535  | 0.3%  |
| Central Manchester University Hospitals NHS Foundation Trust     | RW3 | 192     | 15181 | 15373 | 1.2%  |
| Chelsea and Westminster Hospital NHS Foundation Trust            | RQM | 112     | 4264  | 4376  | 2.6%  |
| Chesterfield Royal Hospital NHS Foundation Trust                 | RFS | 27      | 4487  | 4514  | 0.6%  |
| City Hospitals Sunderland NHS Foundation Trust                   | RLN | 55      | 5637  | 5692  | 1.0%  |
| Colchester Hospital University NHS Foundation Trust              | RDE | 22      | 7074  | 7096  | 0.3%  |
| Countess Of Chester Hospital NHS Foundation Trust                | RJR | 1049    | 3956  | 5005  | ####  |
| County Durham and Darlington NHS Foundation Trust                | RXP | 37      | 11180 | 11217 | 0.3%  |
| Croydon Health Services NHS Trust                                | RJ6 | 481     | 4194  | 4675  | ####  |
| Dartford and Gravesham NHS Trust                                 | RN7 | 25      | 6426  | 6451  | 0.4%  |
| Derby Hospitals NHS Foundation Trust                             | RTG | 181     | 4166  | 4347  | 4.2%  |
| Doncaster and Bassetlaw Hospitals NHS Foundation Trust           | RP5 | 10      | 9623  | 9633  | 0.1%  |
| Dorset County Hospital NHS Foundation Trust                      | RBD | 15      | 2963  | 2978  | 0.5%  |
| East and North Hertfordshire NHS Trust                           | RWH | 25      | 7372  | 7397  | 0.3%  |
| East Cheshire NHS Trust                                          | RJN | -       | -     | 3179  | <0.1% |
| East Kent Hospitals University NHS Foundation Trust              | RVV | 63      | 10829 | 10892 | 0.6%  |
| East Lancashire Hospitals NHS Trust                              | RXR | 15      | 13702 | 13717 | 0.1%  |
| East Sussex Hospitals NHS Trust                                  | RXC | 33      | 5951  | 5984  | 0.6%  |

|    |                                                               |     |     |       |       |       |
|----|---------------------------------------------------------------|-----|-----|-------|-------|-------|
| 1  |                                                               |     |     |       |       |       |
| 2  |                                                               |     |     |       |       |       |
| 3  |                                                               |     |     |       |       |       |
| 4  | Epsom and St Helier University Hospitals NHS Trust            | RVR | 59  | 4658  | 4717  | 1.3%  |
| 5  | Frimley Park Hospital NHS Trust                               | RDU | 34  | 13022 | 13056 | 0.3%  |
| 6  | Gateshead Health NHS Foundation Trust                         | RR7 | 17  | 3086  | 3103  | 0.5%  |
| 7  | George Eliot Hospital NHS Trust                               | RLT | -   | -     | 1126  | <0.1% |
| 8  | Gloucestershire Hospitals NHS Foundation Trust                | RTE | 49  | 8193  | 8242  | 0.6%  |
| 9  |                                                               |     |     |       |       |       |
| 10 | Great Ormond Street Hospital NHS Trust                        | RP4 | 216 | 612   | 828   | ####  |
| 11 | Great Western Hospitals NHS Foundation Trust                  | RN3 | 29  | 5800  | 5829  | 0.5%  |
| 12 | Guy's and St Thomas' NHS Foundation Trust                     | RJ1 | 122 | 4269  | 4391  | 2.8%  |
| 13 | Harrogate and District NHS Foundation Trust                   | RCD | 10  | 3300  | 3310  | 0.3%  |
| 14 |                                                               |     |     |       |       |       |
| 15 | Hereford Hospitals NHS Trust                                  | RLQ | 347 | 3453  | 3800  | 9.1%  |
| 16 | Hinchingbrooke Healthcare NHS Trust                           | RQQ | -   | -     | 455   | <0.1% |
| 17 | Homerton University Hospital NHS Foundation Trust             | RQX | 15  | 2576  | 2591  | 0.6%  |
| 18 | Hull and East Yorkshire Hospitals NHS Trust                   | RWA | 19  | 7910  | 7929  | 0.2%  |
| 19 |                                                               |     |     |       |       |       |
| 20 | Imperial College Healthcare NHS Trust                         | RYJ | 207 | 3837  | 4044  | 5.1%  |
| 21 | Ipswich Hospital NHS Trust                                    | RGQ | 30  | 5399  | 5429  | 0.6%  |
| 22 | Isle of wight NHS Trust                                       | R1F | 10  | 2323  | 2333  | 0.4%  |
| 23 |                                                               |     |     |       |       |       |
| 24 | James Paget University Hospitals NHS Foundation Trust         | RGP | 10  | 2940  | 2950  | 0.3%  |
| 25 | Kettering General Hospital NHS Foundation Trust               | RNQ | -   | -     | 5229  | <0.1% |
| 26 | King's College Hospital NHS Foundation Trust                  | RJZ | 96  | 7895  | 7991  | 1.2%  |
| 27 | Kingston Hospital NHS Trust                                   | RAX | 49  | 3772  | 3821  | 1.3%  |
| 28 |                                                               |     |     |       |       |       |
| 29 | Lancashire Teaching Hospitals NHS Trust                       | RXN | 58  | 8954  | 9012  | 0.6%  |
| 30 | Leeds Teaching Hospitals NHS Trust                            | RR8 | 36  | 9409  | 9445  | 0.4%  |
| 31 | London North West Healthcare NHS Trust                        | R1K | 69  | 8792  | 8861  | 0.8%  |
| 32 | Luton and Dunstable Hospital NHS Foundation Trust             | RC9 | 41  | 9123  | 9164  | 0.4%  |
| 33 |                                                               |     |     |       |       |       |
| 34 | Maidstone and Tunbridge Wells NHS Trust                       | RWF | 16  | 4750  | 4766  | 0.3%  |
| 35 | Medway NHS Trust                                              | RPA | 34  | 8205  | 8239  | 0.4%  |
| 36 | Mid Essex Hospital Services NHS Trust                         | RQ8 | 33  | 5353  | 5386  | 0.6%  |
| 37 | Mid Staffordshire NHS Foundation Trust                        | RJD | 18  | 2616  | 2634  | 0.7%  |
| 38 |                                                               |     |     |       |       |       |
| 39 | Mid Yorkshire Hospitals NHS Trust                             | RXF | 32  | 10681 | 10713 | 0.3%  |
| 40 | Milton Keynes Hospital NHS Foundation Trust                   | RD8 | 38  | 6523  | 6561  | 0.6%  |
| 41 | Newcastle Upon Tyne Hospitals NHS Foundation Trust            | RTD | 141 | 14332 | 14473 | 1.0%  |
| 42 | Norfolk and Norwich University Hospitals NHS Foundation Trust | RM1 | 25  | 8824  | 8849  | 0.3%  |
| 43 |                                                               |     |     |       |       |       |
| 44 | North Bristol NHS Trust                                       | RVJ | 19  | 996   | 1015  | 1.9%  |
| 45 | North Cumbria University Hospitals NHS Trust                  | RNL | 159 | 5837  | 5996  | 2.7%  |
| 46 | North Lincolnshire and Goole Hosps NHS Foundation Trust       | RJL | 7   | 5531  | 5538  | 0.1%  |
| 47 |                                                               |     |     |       |       |       |
| 48 | North Middlesex University Hospital NHS Trust                 | RAP | 58  | 7613  | 7671  | 0.8%  |
| 49 | North Tees and Hartlepool NHS Foundation Trust                | RVW | -   | -     | 5043  | <0.1% |
| 50 | Northampton General Hospital NHS Trust                        | RNS | 16  | 7594  | 7610  | 0.2%  |
| 51 | Northern Devon Healthcare NHS Trust                           | RBZ | 13  | 2528  | 2541  | 0.5%  |
| 52 |                                                               |     |     |       |       |       |
| 53 | Northumbria Healthcare NHS Foundation Trust                   | RTF | 15  | 6137  | 6152  | 0.2%  |
| 54 | Nottingham University Hospitals NHS Trust                     | RX1 | 26  | 9005  | 9031  | 0.3%  |
| 55 | Oxford Radcliffe Hospital NHS Trust                           | RTH | 110 | 10408 | 10518 | 1.0%  |
| 56 | Pennine Acute Hospitals NHS Trust                             | RW6 | 41  | 17532 | 17573 | 0.2%  |
| 57 |                                                               |     |     |       |       |       |
| 58 | Peterborough and Stamford Hospitals NHS Foundation Trust      | RGN | 17  | 6931  | 6948  | 0.2%  |
| 59 | Plymouth Hospitals NHS Trust                                  | RK9 | 16  | 7560  | 7576  | 0.2%  |
| 60 | Poole Hospital NHS Foundation Trust                           | RD3 | 67  | 8293  | 8360  | 0.8%  |

1  
2  
3  
4  
5  
6  
7  
8  
9  
10  
11  
12  
13  
14  
15  
16  
17  
18  
19  
20  
21  
22  
23  
24  
25  
26  
27  
28  
29  
30  
31  
32  
33  
34  
35  
36  
37  
38  
39  
40  
41  
42  
43  
44  
45  
46  
47  
48  
49  
50  
51  
52  
53  
54  
55  
56  
57  
58  
59  
60

|                                                               |     |     |       |       |       |
|---------------------------------------------------------------|-----|-----|-------|-------|-------|
| Portsmouth Hospitals NHS Trust                                | RHU | 21  | 7075  | 7096  | 0.3%  |
| Princess Alexandra Hospital NHSTrust                          | RQW | 32  | 2770  | 2802  | 1.1%  |
| Queen Elizabeth Hospital Kings Lynn NHS Foundation Trust      | RCX | 9   | 4126  | 4135  | 0.2%  |
| Royal Berkshire Hospital NHS Foundation Trust                 | RHW | 73  | 5495  | 5568  | 1.3%  |
| Royal Bolton Hospital NHS Foundation Trust                    | RMC | 22  | 8272  | 8294  | 0.3%  |
| Royal Bournemouth and Christchurch Trust                      | RDZ | 34  | 479   | 513   | 6.6%  |
| Royal Cornwall Hospitals NHS Trust                            | REF | 55  | 6932  | 6987  | 0.8%  |
| Royal Devon and Exeter NHS Foundation Trust                   | RH8 | 39  | 6081  | 6120  | 0.6%  |
| Royal Free Hampstead NHSTrust                                 | RAL | 116 | 8720  | 8836  | 1.3%  |
| Royal Liverpool Broadgreen Hospitals NHS Trust                | RQ6 | 19  | 857   | 876   | 2.2%  |
| Royal Surrey County NHS Foundation Trust                      | RA2 | 70  | 3659  | 3729  | 1.9%  |
| Royal United Hospital Bath NHS Trust                          | RD1 | 46  | 6146  | 6192  | 0.7%  |
| Royal Wolverhampton Hospital NHS Trust                        | RL4 | 36  | 8040  | 8076  | 0.4%  |
| Salford Royal NHS Foundation Trust                            | RM3 | 19  | 2939  | 2958  | 0.6%  |
| Salisbury NHS Foundation Trust                                | RNZ | 21  | 2359  | 2380  | 0.9%  |
| Sandwell and West Birmingham Hospitals NHS Trust              | RXK | 75  | 8955  | 9030  | 0.8%  |
| Sheffield Children's NHS Foundation Trust                     | RCU | 16  | 7095  | 7111  | 0.2%  |
| Sheffield Teaching Hospitals NHS Foundation Trust             | RHQ | -   | -     | 1438  | <0.1% |
| Sherwood Forest Hospitals NHS Foundation Trust                | RK5 | 39  | 5065  | 5104  | 0.8%  |
| Shrewsbury and Telford Hospital NHS Trust                     | RXW | 731 | 7873  | 8604  | 8.5%  |
| South Devon Health Care NHS Trust                             | RA9 | 36  | 3242  | 3278  | 1.1%  |
| South Tees Hospitals NHS Foundation Trust                     | RTR | 36  | 10272 | 10308 | 0.3%  |
| South Tyneside NHS Foundation Trust                           | RE9 | -   | -     | 1628  | <0.1% |
| South Warwickshire NHS Foundation Trust                       | RJC | 330 | 3488  | 3818  | 8.6%  |
| Southampton University Hospitals NHS Trust                    | RHM | 97  | 10154 | 10251 | 0.9%  |
| Southend University Hospitals NHS Foundation Trust            | RAJ | 13  | 2857  | 2870  | 0.5%  |
| Southport and Ormskirk Hospital NHS Trust                     | RVY | 33  | 4397  | 4430  | 0.7%  |
| St George's Healthcare NHS Trust                              | RJ7 | 79  | 7366  | 7445  | 1.1%  |
| St Helens and Knowsley Hospitals NHS Trust                    | RBN | 53  | 6657  | 6710  | 0.8%  |
| Stockport NHS Foundation Trust                                | RWJ | 13  | 5540  | 5553  | 0.2%  |
| Surrey and Sussex Healthcare NHS Trust                        | RTP | 64  | 4040  | 4104  | 1.6%  |
| Tameside Hospital NHS Foundation Trust                        | RMP | 33  | 4815  | 4848  | 0.7%  |
| Taunton and Somerset NHS Foundation Trust                     | RBA | 44  | 4730  | 4774  | 0.9%  |
| The Dudley Group Of Hospitals NHS Foundation Trust            | RNA | 11  | 6993  | 7004  | 0.2%  |
| The Hillingdon Hospital NHS Trust                             | RAS | 65  | 4475  | 4540  | 1.4%  |
| The Lewisham Healthcare NHSTrust                              | RJ2 | 601 | 11875 | 12476 | 4.8%  |
| The Mid Cheshire Hospitals NHS Trust                          | RBT | 27  | 5159  | 5186  | 0.5%  |
| The Rotherham NHS Foundation Trust                            | RFR | -   | -     | 3967  | <0.1% |
| The Walton Centre NHS Foundation Trust                        | RET | 7   | 34    | 41    | ####  |
| United Lincolnshire Hospitals NHS Trust                       | RWD | 77  | 8350  | 8427  | 0.9%  |
| University College London Hospitals NHS Foundation Trust      | RRV | 124 | 2406  | 2530  | 4.9%  |
| University Hospital Birmingham NHS Foundation Trust           | RRK | 16  | 788   | 804   | 2.0%  |
| University Hospital Of North Staffordshire Hospital NHS Trust | RJE | 42  | 13351 | 13393 | 0.3%  |
| University Hospital Of South Manchester NHS Foundation Trust  | RM2 | 32  | 6607  | 6639  | 0.5%  |
| University Hospitals Coventry and Warwickshire NHS Trust      | RKB | 39  | 8421  | 8460  | 0.5%  |
| University Hospitals Of Bristol NHS Foundation Trust          | RA7 | 120 | 9975  | 10095 | 1.2%  |

1  
2  
3  
4  
5  
6  
7  
8  
9  
10  
11  
12  
13  
14  
15  
16  
17  
18  
19  
20  
21  
22  
23  
24  
25  
26  
27  
28  
29  
30  
31  
32  
33  
34  
35  
36  
37  
38  
39  
40  
41  
42  
43  
44  
45  
46  
47  
48  
49  
50  
51  
52  
53  
54  
55  
56  
57  
58  
59  
60

|                                                             |     |       |        |        |      |
|-------------------------------------------------------------|-----|-------|--------|--------|------|
| University Hospitals Of Leicester NHS Trust                 | RWE | 403   | 9514   | 9917   | 4.1% |
| University Hospitals Of Morecambe Bay NHS Foundation Trust  | RTX | 62    | 6775   | 6837   | 0.9% |
| Walsall Hospitals NHS Trust                                 | RBK | 13    | 3350   | 3363   | 0.4% |
| Warrington and Halton Hospitals NHS Foundation Trust        | RWW | 60    | 5048   | 5108   | 1.2% |
| West Hertfordshire Hospitals NHS Trust                      | RWG | 29    | 5521   | 5550   | 0.5% |
| West Middlesex University NHS Trust                         | RFW | 34    | 3098   | 3132   | 1.1% |
| West Suffolk Hospital NHS Trust                             | RGR | 25    | 4007   | 4032   | 0.6% |
| Western Sussex Hospitals NHS Trust                          | RYR | 35    | 7452   | 7487   | 0.5% |
| Weston Area Health NHS Trust                                | RA3 | 17    | 852    | 869    | 2.0% |
| Whittington Hospital NHS Trust                              | RKE | 9     | 3518   | 3527   | 0.3% |
| Wirral University Teaching Hospital NHS Foundation Trust    | RBL | 97    | 6643   | 6740   | 1.4% |
| Worcestershire Acute Hospitals NHS Trust                    | RWP | 24    | 7270   | 7294   | 0.3% |
| Wrightington, Wigan and Leigh NHS Foundation Trust          | RRF | 8     | 3106   | 3114   | 0.3% |
| Yeovil District Hospital NHS Foundation Trust               | RA4 | 24    | 2182   | 2206   | 1.1% |
| York Hospitals NHS Trust                                    | RCB | 66    | 7723   | 7789   | 0.8% |
| Total                                                       |     | 10564 | 854667 | 887296 | 1.2% |
| Notes. Where 5 or fewer invalid cases, number is suppressed |     |       |        |        |      |



**Appendix Table A2: Paediatric hospital catchment populations by Trust and year, English Hospital Episode Statistics 2011/12-2014/15**

|    |     |                                                                 | 2011/12         | 2012/13 | 2013/14 | 2014/15 |        |
|----|-----|-----------------------------------------------------------------|-----------------|---------|---------|---------|--------|
| 1  |     |                                                                 |                 |         |         |         |        |
| 2  |     |                                                                 |                 |         |         |         |        |
| 3  |     |                                                                 |                 |         |         |         |        |
| 4  |     |                                                                 |                 |         |         |         |        |
| 5  |     |                                                                 |                 |         |         |         |        |
| 6  |     |                                                                 |                 |         |         |         |        |
| 7  |     |                                                                 |                 |         |         |         |        |
| 8  |     |                                                                 |                 |         |         |         |        |
| 9  |     |                                                                 |                 |         |         |         |        |
| 10 | REM | Aintree University Hospitals NHS Foundation Trust               | North West      | 10023   | 10327   | 8631    | 10848  |
| 11 |     |                                                                 | Yorkshire and   |         |         |         |        |
| 12 | RCF | Airedale NHS Foundation Trust                                   | The Humber      | 41949   | 39720   | 43968   | 43450  |
| 13 | RBS | Alder Hey Childrens NHS Foundation Trust                        | North West      | 135592  | 135873  | 135226  | 134281 |
| 14 |     | Ashford and St Peter's Hospitals NHS Foundation                 | South East      |         |         |         |        |
| 15 | RTK | Trust                                                           | Coast           | 67507   | 66359   | 67714   | 67049  |
| 16 | RF4 | Barking, Havering and Redbridge University Hospitals NHS Trust  | London          | 197275  | 149765  | 149133  | 145366 |
| 17 |     |                                                                 |                 |         |         |         |        |
| 18 | RVL | Barnet and Chase Farm Hospitals NHS Trust                       | London          | 127294  | 127254  | 113094  | .      |
| 19 | RFF | Barnsley Dist Gen Hosp NHS Foundation Trust                     | Yorkshire and   |         |         |         |        |
| 20 |     |                                                                 | The Humber      | 50808   | 51686   | 51165   | 52966  |
| 21 | R1H | Barts Health NHS Trust                                          | London          | 12668   | 267307  | 270243  | 268558 |
| 22 | RDD | Basildon and Thurrock University Hospitals NHS Foundation Trust | East of England | 78568   | 72928   | 75975   | 77489  |
| 23 |     | Basingstoke and North Hampshire Hospitals NHS                   |                 |         |         |         |        |
| 24 | RN5 | Foundation Trust                                                | South Central   | 85695   | 102867  | 101435  | 99421  |
| 25 | RC1 | Bedford Hospital NHS Trust                                      | East of England | 47451   | 49333   | 32284   | 48718  |
| 26 | RQ3 | Birmingham Children's Hospital NHS Foundation Trust             | West Midlands   | 167662  | 166577  | 162074  | 159686 |
| 27 | RR1 | Birmingham Heartlands and Solihull Trust                        | West Midlands   | 179182  | 175711  | 173618  | 180098 |
| 28 | RLU | Birmingham Women's NHS Foundation Trust                         | West Midlands   | 2622    | 2783    | 2526    | 2897   |
| 29 | RXL | Blackpool Fylde and Wyre NHS Foundation Trust                   | North West      | 58761   | 59309   | 59561   | 60397  |
| 30 |     |                                                                 | Yorkshire and   |         |         |         |        |
| 31 | RAE | Bradford Teaching Hospitals NHS Foundation Trust                | The Humber      | 113843  | 114617  | 111292  | 111030 |
| 32 |     |                                                                 | South East      |         |         |         |        |
| 33 | RXH | Brighton and Sussex University Hospitals NHS Trust              | Coast           | 95573   | 99438   | 103746  | 105282 |
| 34 | RXQ | Buckinghamshire Healthcare NHS Trust                            | South Central   | 102622  | 99708   | 96197   | 99550  |
| 35 | RJF | Burton Hospitals NHS Foundation Trust                           | West Midlands   | 58296   | 60052   | 62031   | 61559  |
| 36 |     |                                                                 | Yorkshire and   |         |         |         |        |
| 37 | RWY | Calderdale and Huddersfield NHS Foundation Trust                | The Humber      | 96587   | 95166   | 96430   | 95715  |
| 38 | RGT | Cambridge University Hospitals NHS Foundation Trust             | East of England | 94724   | 93112   | 94595   | 94647  |
| 39 | RYV | Cambridgeshire Community Services NHS Trust                     | East of England | 36498   | 38274   | 38476   | 38372  |
| 40 |     | Central Manchester University Hospitals NHS                     |                 |         |         |         |        |
| 41 | RW3 | Foundation Trust                                                | North West      | 129668  | 123097  | 131327  | 134340 |
| 42 |     | Chelsea and Westminster Hospital NHS Foundation                 |                 |         |         |         |        |
| 43 | RQM | Trust                                                           | London          | 90449   | 93355   | 88865   | 86439  |
| 44 | RFS | Chesterfield Royal Hospital NHS Foundation Trust                | East Midlands   | 55086   | 56540   | 55790   | 56603  |
| 45 | RBV | Christie Hospital NHS Trust                                     | North West      | 249     | 71      | 202     | 231    |
| 46 | RLN | City Hospitals Sunderland NHS Foundation Trust                  | North East      | 61855   | 60998   | 63551   | 63650  |
| 47 |     | Clatterbridge Centre For Oncology NHS Foundation                |                 |         |         |         |        |
| 48 | REN | Trust                                                           | North West      | 61      | 17      | .       | 45     |
| 49 | RDE | Colchester Hospital University NHS Foundation Trust             | East of England | 72893   | 71762   | 74634   | 75048  |
| 50 | RJR | Countess Of Chester Hospital NHS Foundation Trust               | North West      | 43561   | 43650   | 42978   | 43204  |
| 51 | RXP | County Durham and Darlington NHS Foundation Trust               | North East      | 107566  | 108332  | 107119  | 108941 |
| 52 |     |                                                                 |                 |         |         |         |        |
| 53 | RJ6 | Croydon Health Services NHS Trust                               | London          | 81355   | 78015   | 78090   | 77160  |
| 54 |     |                                                                 | South East      |         |         |         |        |
| 55 | RN7 | Dartford and Gravesham NHS Trust                                | Coast           | 76140   | 73911   | 78523   | 77768  |
| 56 | RTG | Derby Hospitals NHS Foundation Trust                            | East Midlands   | 101760  | 103757  | 104768  | 101709 |
| 57 |     | Doncaster and Bassetlaw Hospitals NHS Foundation                | Yorkshire and   |         |         |         |        |
| 58 | RP5 | Trust                                                           | The Humber      | 102095  | 100803  | 98480   | 100244 |
| 59 | RBD | Dorset County Hospital NHS Foundation Trust                     | South West      | 40217   | 40655   | 39469   | 38763  |
| 60 |     |                                                                 |                 |         |         |         |        |

|    |     |                                                     |                 |        |        |        |        |
|----|-----|-----------------------------------------------------|-----------------|--------|--------|--------|--------|
| 1  |     |                                                     |                 |        |        |        |        |
| 2  |     |                                                     |                 |        |        |        |        |
| 3  |     |                                                     |                 |        |        |        |        |
| 4  | RC3 | Ealing Hospital NHS Trust                           | London          | 58077  | 53775  | 52820  | .      |
| 5  | RWH | East and North Hertfordshire NHS Trust              | East of England | 110674 | 104026 | 106784 | 105074 |
| 6  | RJN | East Cheshire NHS Trust                             | North West      | 38204  | 36740  | 36029  | 35913  |
| 7  |     |                                                     | South East      |        |        |        |        |
| 8  | RVV | East Kent Hospitals University NHS Foundation Trust | Coast           | 137896 | 137059 | 138382 | 141973 |
| 9  | RXR | East Lancashire Hospitals NHS Trust                 | North West      | 116271 | 119014 | 118240 | 117300 |
| 10 |     |                                                     | South East      |        |        |        |        |
| 11 | RXC | East Sussex Hospitals NHS Trust                     | Coast           | 80445  | 77868  | 73828  | 73412  |
| 12 | RVR | Epsom and St Helier University Hospitals NHS Trust  | London          | 87348  | 83731  | 81162  | 85745  |
| 13 |     |                                                     | South East      |        |        |        |        |
| 14 | RDU | Frimley Park Hospital NHS Trust                     | Coast           | 80008  | 85799  | 88597  | 190069 |
| 15 | RR7 | Gateshead Health NHS Foundation Trust               | North East      | 43832  | 43763  | 38241  | 36789  |
| 16 | RLT | George Eliot Hospital NHS Trust                     | West Midlands   | 30544  | 29618  | 20570  | 19381  |
| 17 | RTE | Gloucestershire Hospitals NHS Foundation Trust      | South West      | 120471 | 120927 | 120459 | 119516 |
| 18 | RP4 | Great Ormond Street Hospital NHS Trust              | London          | 44418  | 17789  | 7456   | 6236   |
| 19 |     |                                                     |                 |        |        |        |        |
| 20 | RN3 | Great Western Hospitals NHS Foundation Trust        | South West      | 79223  | 78668  | 79347  | 82167  |
| 21 | RJ1 | Guy's and St Thomas' NHS Foundation Trust           | London          | 85083  | 69753  | 71571  | 64902  |
| 22 |     |                                                     | Yorkshire and   |        |        |        |        |
| 23 | RCD | Harrogate and District NHS Foundation Trust         | The Humber      | 40531  | 40823  | 40145  | 40560  |
| 24 |     | Heatherwood and Wexham Park Hosps NHS               |                 |        |        |        |        |
| 25 | RD7 | Foundation Trust                                    | South Central   | 99093  | 99936  | 100829 | .      |
| 26 | RLQ | Hereford Hospitals NHS Trust                        | West Midlands   | 38422  | 37728  | 38147  | 39130  |
| 27 | RQQ | Hinchingbrooke Healthcare NHS Trust                 | East of England | 7964   | 6273   | 6811   | 6738   |
| 28 | RQX | Homerton University Hospital NHS Foundation Trust   | London          | 89851  | 52951  | 52578  | 49332  |
| 29 |     |                                                     | Yorkshire and   |        |        |        |        |
| 30 | RWA | Hull and East Yorkshire Hospitals NHS Trust         | The Humber      | 105424 | 106722 | 106685 | 106281 |
| 31 | RYJ | Imperial College Healthcare NHS Trust               | London          | 72424  | 67571  | 74510  | 75876  |
| 32 | RGQ | Ipswich Hospital NHS Trust                          | East of England | 71307  | 71010  | 71234  | 71379  |
| 33 | R1F | Isle of wight NHS Trust                             | South Central   | .      | 31154  | 30292  | 28924  |
| 34 |     | James Paget University Hospitals NHS Foundation     |                 |        |        |        |        |
| 35 | RGP | Trust                                               | East of England | 46037  | 45337  | 44979  | 43863  |
| 36 | RNQ | Kettering General Hospital NHS Foundation Trust     | East Midlands   | 68698  | 69630  | 68806  | 67436  |
| 37 | RJZ | King's College Hospital NHS Foundation Trust        | London          | 88602  | 86947  | 148099 | 150224 |
| 38 |     |                                                     |                 |        |        |        |        |
| 39 | RAX | Kingston Hospital NHS Trust                         | London          | 75380  | 68716  | 69583  | 70421  |
| 40 | RXN | Lancashire Teaching Hospitals NHSTrust              | North West      | 87179  | 87630  | 88836  | 87841  |
| 41 |     |                                                     | Yorkshire and   |        |        |        |        |
| 42 | RR8 | Leeds Teaching Hospitals NHS Trust                  | The Humber      | 153920 | 148568 | 150597 | 151367 |
| 43 | RBQ | Liverpool Heart and Chest NHS Foundation Trust      | North West      | 106    | 20     | 47     | 64     |
| 44 | REP | Liverpool Womens Hospital NHS Trust                 | North West      | 1656   | 1833   | 3561   | 2475   |
| 45 | R1K | London North West Healthcare NHS Trust              | London          | .      | .      | 486    | 166660 |
| 46 | RC9 | Luton and Dunstable Hospital NHS Foundation Trust   | East of England | 96418  | 95475  | 95886  | 96289  |
| 47 |     |                                                     | South East      |        |        |        |        |
| 48 | RWF | Maidstone and Tunbridge Wells NHS Trust             | Coast           | 105941 | 102464 | 103455 | 104481 |
| 49 |     |                                                     | South East      |        |        |        |        |
| 50 | RPA | Medway NHS Trust                                    | Coast           | 95192  | 94535  | 92696  | 92044  |
| 51 | RQ8 | Mid Essex Hospital Services NHS Trust               | East of England | 120888 | 107718 | 101410 | 100503 |
| 52 | RJD | Mid Staffordshire NHS Foundation Trust              | West Midlands   | 51662  | 48065  | 47435  | 26235  |
| 53 |     |                                                     | Yorkshire and   |        |        |        |        |
| 54 | RXF | Mid Yorkshire Hospitals NHS Trust                   | The Humber      | 132650 | 133511 | 135039 | 133869 |
| 55 | RD8 | Milton Keynes Hospital NHS Foundation Trust         | South Central   | 68637  | 69072  | 79382  | 68737  |
| 56 | RP6 | Moorfields Eye Hospital NHS Foundation Trust        | London          | 1824   | 916    | 916    | 843    |
| 57 |     |                                                     |                 |        |        |        |        |
| 58 | RTD | Newcastle Upon Tyne Hospitals NHS Foundation Trust  | North East      | 117233 | 117214 | 121658 | 124257 |
| 59 |     | Norfolk and Norwich University Hospitals NHS        |                 |        |        |        |        |
| 60 | RM1 | Foundation Trust                                    | East of England | 116286 | 114535 | 114161 | 118394 |

|    |     |                                                          |                            |        |        |        |        |
|----|-----|----------------------------------------------------------|----------------------------|--------|--------|--------|--------|
| 1  |     |                                                          |                            |        |        |        |        |
| 2  |     |                                                          |                            |        |        |        |        |
| 3  |     |                                                          |                            |        |        |        |        |
| 4  | RVJ | North Bristol NHS Trust                                  | South West                 | 49997  | 45687  | 48493  | 19435  |
| 5  | RNL | North Cumbria University Hospitals NHS Trust             | North West                 | 66588  | 66042  | 66633  | 66748  |
| 6  | RJL | North Lincolnshire and Goole Hosps NHS Foundation Trust  | Yorkshire and The Humber   | 87840  | 89727  | 87901  | 87428  |
| 7  | RAP | North Middlesex University Hospital NHS Trust            | London                     | 69610  | 59956  | 74570  | 96137  |
| 8  | RVW | North Tees and Hartlepool NHS Foundation Trust           | North East                 | 62654  | 62927  | 61569  | 61068  |
| 9  | RV8 | North West London Hospitals NHS Trust                    | London                     | 124936 | 122553 | 120266 | .      |
| 10 | RNS | Northampton General Hospital NHS Trust                   | East Midlands              | 79616  | 79064  | 79996  | 80178  |
| 11 | RBZ | Northern Devon Healthcare NHS Trust                      | South West                 | 36726  | 36767  | 35147  | 34821  |
| 12 | RTF | Northumbria Healthcare NHS Foundation Trust              | North East                 | 66237  | 66331  | 67151  | 65421  |
| 13 | RX1 | Nottingham University Hospitals NHS Trust                | East Midlands              | 171690 | 169301 | 169578 | 172520 |
| 14 | RTH | Oxford Radcliffe Hospital NHS Trust                      | South Central              | 150782 | 149553 | 152788 | 153875 |
| 15 | RGM | Papworth Hospital NHS Foundation Trust                   | East of England            | 152    | 109    | 60     | 69     |
| 16 | RW6 | Pennine Acute Hospitals NHS Trust                        | North West                 | 181461 | 177490 | 174316 | 172774 |
| 17 | RGN | Peterborough and Stamford Hospitals NHS Foundation Trust | East of England            | 76073  | 78570  | 78495  | 79335  |
| 18 | RK9 | Plymouth Hospitals NHS Trust                             | South West                 | 94298  | 94886  | 93753  | 93846  |
| 19 | RD3 | Poole Hospital NHS Foundation Trust                      | South West                 | 100557 | 97418  | 97080  | 97422  |
| 20 | RHU | Portsmouth Hospitals NHS Trust                           | South Central              | 126870 | 123691 | 124823 | 118416 |
| 21 | RQW | Princess Alexandra Hospital NHS Trust                    | East of England            | 65509  | 62257  | 62667  | 61910  |
| 22 | RCX | Queen Elizabeth Hospital Kings Lynn NHS Foundation Trust | East of England South East | 46079  | 45410  | 46035  | 44609  |
| 23 | RPC | Queen Victoria Hospital NHS Foundation Trust             | Coast                      | 30623  | 31677  | 32219  | 28764  |
| 24 | RL1 | Robert Jones and Agnes Hunt Orthopaedic NHS Trust        | West Midlands              | 386    | 179    | 68     | 93     |
| 25 | RHW | Royal Berkshire Hospital NHS Foundation Trust            | South Central              | 107907 | 103139 | 101569 | 100771 |
| 26 | RMC | Royal Bolton Hospital NHS Foundation Trust               | North West                 | 82536  | 84113  | 84077  | 84314  |
| 27 | RDZ | Royal Bournemouth and Christchurch Trust                 | South West                 | 5939   | 7681   | 5662   | 6007   |
| 28 | RT3 | Royal Brompton and Harefield NHS Foundation Trust        | London                     | 5283   | 4361   | 3825   | 3899   |
| 29 | REF | Royal Cornwall Hospitals NHS Trust                       | South West                 | 94173  | 94210  | 91643  | 91698  |
| 30 | RH8 | Royal Devon and Exeter NHS Foundation Trust              | South West                 | 75572  | 76294  | 75519  | 78322  |
| 31 | RAL | Royal Free Hampstead NHS Trust                           | London                     | 52443  | 50068  | 48224  | 155113 |
| 32 | RQ6 | Royal Liverpool Broadgreen Hospitals NHS Trust           | North West                 | 12435  | 11431  | 12377  | 12110  |
| 33 | RBB | Royal Nat Hosp Rheumatic Diseases NHS Trust              | South West                 | 24     | 24     | .      | .      |
| 34 | RRJ | Royal Orthopaedic Hospital NHS Foundation Trust          | West Midlands South East   | 343    | 209    | 293    | 405    |
| 35 | RA2 | Royal Surrey County NHS Foundation Trust                 | Coast                      | 69295  | 69069  | 68703  | 67670  |
| 36 | RD1 | Royal United Hospital Bath NHS Trust                     | South West                 | 91687  | 92969  | 93205  | 92029  |
| 37 | RL4 | Royal Wolverhampton Hospital NHS Trust                   | West Midlands              | 76825  | 76809  | 79145  | 79276  |
| 38 | RM3 | Salford Royal NHS Foundation Trust                       | North West                 | 36907  | 36818  | 34678  | 34985  |
| 39 | RNZ | Salisbury NHS Foundation Trust                           | South West                 | 53602  | 47693  | 47618  | 47659  |
| 40 | RXK | Sandwell and West Birmingham Hospitals NHS Trust         | West Midlands              | 94462  | 94120  | 98396  | 100183 |
| 41 | RCC | Scarborough and North East Yorkshire NHS Trust           | Yorkshire and The Humber   | 35573  | .      | .      | .      |
| 42 | RCU | Sheffield Children's NHS Foundation Trust                | Yorkshire and The Humber   | 115371 | 116009 | 117548 | 102197 |
| 43 | RHQ | Sheffield Teaching Hospitals NHS Foundation Trust        | Yorkshire and The Humber   | 18502  | 18740  | 19406  | 27899  |
| 44 | RK5 | Sherwood Forest Hospitals NHS Foundation Trust           | East Midlands              | 69176  | 70373  | 70109  | 70777  |
| 45 | RXW | Shrewsbury and Telford Hospital NHS Trust                | West Midlands              | 100221 | 101232 | 100641 | 102368 |
| 46 | RA9 | South Devon Health Care NHS Trust                        | South West                 | 49907  | 50574  | 50908  | 50569  |
| 47 | RYQ | South London Healthcare NHS Trust                        | London                     | 139032 | 147968 | 39830  | .      |

|    |     |                                                               |                          |        |        |        |        |
|----|-----|---------------------------------------------------------------|--------------------------|--------|--------|--------|--------|
| 1  |     |                                                               |                          |        |        |        |        |
| 2  |     |                                                               |                          |        |        |        |        |
| 3  |     |                                                               |                          |        |        |        |        |
| 4  | RTR | South Tees Hospitals NHS Foundation Trust                     | North East               | 97604  | 97851  | 97981  | 98197  |
| 5  | RE9 | South Tyneside NHS Foundation Trust                           | North East               | 25878  | 25367  | 24299  | 23625  |
| 6  | RJC | South Warwickshire NHS Foundation Trust                       | West Midlands            | 46900  | 47121  | 47468  | 46629  |
| 7  | RHM | Southampton University Hospitals NHS Trust                    | South Central            | 134343 | 115636 | 117210 | 120636 |
| 8  | RAJ | Southend University Hospitals NHS Foundation Trust            | East of England          | 65574  | 66876  | 68295  | 66039  |
| 9  | RVY | Southport and Ormskirk Hospital NHS Trust                     | North West               | 53815  | 53137  | 51841  | 53484  |
| 10 | RJ7 | St George's Healthcare NHS Trust                              | London                   | 103559 | 109089 | 113127 | 118041 |
| 11 | RBN | St Helens and Knowsley Hospitals NHS Trust                    | North West               | 61878  | 65500  | 65986  | 67966  |
| 12 | RWJ | Stockport NHS Foundation Trust                                | North West               | 66698  | 68799  | 65856  | 63583  |
| 13 |     |                                                               | South East               |        |        |        |        |
| 14 | RTP | Surrey and Sussex Healthcare NHS Trust                        | Coast                    | 95076  | 92811  | 93180  | 83612  |
| 15 | RMP | Tameside Hospital NHS Foundation Trust                        | North West               | 47340  | 48784  | 47877  | 48707  |
| 16 | RBA | Taunton and Somerset NHS Foundation Trust                     | South West               | 67189  | 67320  | 66528  | 66116  |
| 17 | RNA | The Dudley Group Of Hospitals NHS Foundation Trust            | West Midlands            | 82101  | 82900  | 80817  | 81498  |
| 18 | RAS | The Hillingdon Hospital NHS Trust                             | London                   | 65107  | 61012  | 61198  | 65195  |
| 19 | RJ2 | The Lewisham Healthcare NHS Trust                             | London                   | 62637  | 61055  | 103280 | 151669 |
| 20 | RBT | The Mid Cheshire Hospitals NHS Trust                          | North West               | 57013  | 54683  | 57962  | 56699  |
| 21 |     |                                                               | Yorkshire and            |        |        |        |        |
| 22 | RFR | The Rotherham NHS Foundation Trust                            | The Humber               | 53392  | 51784  | 50347  | 52577  |
| 23 | RPY | The Royal Marsden NHS Foundation Trust                        | London                   | 382    | 216    | 348    | 104    |
| 24 | RAN | The Royal National Orthopaedic Hospital NHS Trust             | London                   | 973    | 529    | 289    | 409    |
| 25 | RET | The Walton Centre NHS Foundation Trust                        | North West               | 440    | 263    | 255    | 281    |
| 26 | RWD | United Lincolnshire Hospitals NHS Trust                       | East Midlands            | 118708 | 115559 | 115924 | 112401 |
| 27 | RRV | University College London Hospitals NHS Foundation Trust      | London                   | 52193  | 39854  | 42780  | 42106  |
| 28 | RRK | University Hospital Birmingham NHS Foundation Trust           | West Midlands            | 11362  | 10510  | 12108  | 10979  |
| 29 |     | University Hospital Of North Staffordshire Hospital NHS Trust | West Midlands            | 107959 | 108300 | 110705 | 127581 |
| 30 | RJE | University Hospital Of South Manchester NHS Foundation Trust  | North West               | 70604  | 70443  | 70896  | 71403  |
| 31 | RM2 | University Hospitals Coventry and Warwickshire NHS Trust      | West Midlands            | 116634 | 116159 | 126521 | 126537 |
| 32 | RKB | University Hospitals Of Bristol NHS Foundation Trust          | South West               | 145749 | 145288 | 145188 | 172827 |
| 33 | RA7 | University Hospitals Of Leicester NHS Trust                   | East Midlands            | 188490 | 188424 | 189865 | 192382 |
| 34 | RWE | University Hospitals Of Morecambe Bay NHS Foundation Trust    | North West               | 69612  | 68370  | 67995  | 68522  |
| 35 | RTX | Walsall Hospitals NHS Trust                                   | West Midlands            | 56799  | 58354  | 56452  | 55821  |
| 36 | RBK | Warrington and Halton Hospitals NHS Foundation Trust          | North West               | 64831  | 63822  | 61770  | 61421  |
| 37 | RWW | West Hertfordshire Hospitals NHS Trust                        | East of England          | 91480  | 91916  | 97486  | 95384  |
| 38 | RWG | West Middlesex University NHS Trust                           | London                   | 59734  | 65428  | 67430  | 63584  |
| 39 | RFW | West Suffolk Hospital NHS Trust                               | East of England          | 57097  | 58326  | 57180  | 56939  |
| 40 | RGR | Western Sussex Hospitals NHS Trust                            | South East Coast         | 96626  | 94666  | 91769  | 94045  |
| 41 | RYR | Weston Area Health NHS Trust                                  | South West               | 13122  | 11742  | 12538  | 13040  |
| 42 | RA3 | Whittington Hospital NHS Trust                                | London                   | 53355  | 50811  | 51311  | 50647  |
| 43 | RKE | Wirral University Teaching Hospital NHS Foundation Trust      | North West               | 71996  | 72292  | 72743  | 72140  |
| 44 | RBL | Worcestershire Acute Hospitals NHS Trust                      | West Midlands            | 120307 | 118484 | 117303 | 115581 |
| 45 | RWP | Wrightington, Wigan and Leigh NHS Foundation Trust            | North West               | 52988  | 53106  | 52291  | 51486  |
| 46 | RRF | Yeovil District Hospital NHS Foundation Trust                 | South West               | 37273  | 38748  | 37598  | 35923  |
| 47 | RA4 | York Hospitals NHS Trust                                      | Yorkshire and The Humber | 70501  | 105737 | 103237 | 104298 |
| 48 | RCB |                                                               |                          |        |        |        |        |
| 49 |     |                                                               |                          |        |        |        |        |
| 50 |     |                                                               |                          |        |        |        |        |
| 51 |     |                                                               |                          |        |        |        |        |
| 52 |     |                                                               |                          |        |        |        |        |
| 53 |     |                                                               |                          |        |        |        |        |
| 54 |     |                                                               |                          |        |        |        |        |
| 55 |     |                                                               |                          |        |        |        |        |
| 56 |     |                                                               |                          |        |        |        |        |
| 57 |     |                                                               |                          |        |        |        |        |
| 58 |     |                                                               |                          |        |        |        |        |
| 59 |     |                                                               |                          |        |        |        |        |
| 60 |     |                                                               |                          |        |        |        |        |

**Appendix Table A3. Paediatric hospital catchment populations by Trust, deprivation quintile, English Hospital Episode Statistics, 2013/14**

|     |                                                                 | Deprivation quintile |       |       |       |       | Total  | % in most deprived quintile | % in least deprived quintile |
|-----|-----------------------------------------------------------------|----------------------|-------|-------|-------|-------|--------|-----------------------------|------------------------------|
|     |                                                                 | 1 (Most deprived)    | 2     | 3     | 4     | 5     |        |                             |                              |
| REM | Aintree University Hospitals NHS Foundation Trust               | 4330                 | 1126  | 1903  | 891   | 381   | 8631   | 50.2%                       | 4.4%                         |
| RCF | Airedale NHS Foundation Trust                                   | 9488                 | 5421  | 8214  | 12856 | 7989  | 43968  | 21.6%                       | 18.2%                        |
| RBS | Alder Hey Childrens NHS Foundation Trust                        | 78577                | 18715 | 17336 | 12477 | 8121  | 135226 | 58.1%                       | 6.0%                         |
| RTK | Ashford and St Peter's Hospitals NHS Foundation Trust           | 803                  | 6579  | 10863 | 14707 | 34762 | 67714  | 1.2%                        | 51.3%                        |
| RF4 | Barking, Havering and Redbridge University Hospitals NHS Trust  | 35894                | 49190 | 31992 | 20717 | 11341 | 149133 | 24.1%                       | 7.6%                         |
| RVL | Barnet and Chase Farm Hospitals NHS Trust                       | 13252                | 24820 | 31417 | 28228 | 15377 | 113094 | 11.7%                       | 13.6%                        |
| RFF | Barnsley Dist Gen Hosp NHS Foundation Trust                     | 16847                | 14899 | 9311  | 6467  | 3641  | 51165  | 32.9%                       | 7.1%                         |
| R1H | Barts Health NHS Trust                                          | 163144               | 60604 | 24847 | 13148 | 8500  | 270243 | 60.4%                       | 3.1%                         |
| RDD | Basildon and Thurrock University Hospitals NHS Foundation Trust | 14521                | 20050 | 13825 | 11279 | 16300 | 75975  | 19.1%                       | 21.5%                        |
| RN5 | Basingstoke and North Hampshire Hospitals NHS Foundation Trust  | 818                  | 13145 | 13577 | 20675 | 53220 | 101435 | 0.8%                        | 52.5%                        |
| RC1 | Bedford Hospital NHS Trust                                      | 3233                 | 5913  | 5603  | 7476  | 10060 | 32284  | 10.0%                       | 31.2%                        |
| RQ3 | Birmingham Children's Hospital NHS Foundation Trust             | 91604                | 28586 | 25106 | 9722  | 7055  | 162074 | 56.5%                       | 4.4%                         |
| RR1 | Birmingham Heartlands and Solihull Trust                        | 82911                | 22330 | 23792 | 21020 | 23566 | 173618 | 47.8%                       | 13.6%                        |
| RLU | Birmingham Women's NHS Foundation Trust                         | 1146                 | 576   | 459   | 271   | 74    | 2526   | 45.4%                       | 2.9%                         |
| RXL | Blackpool Fylde and Wyre NHS Foundation Trust                   | 19392                | 11532 | 11532 | 9706  | 7400  | 59561  | 32.6%                       | 12.4%                        |
| RAE | Bradford Teaching Hospitals NHS Foundation Trust                | 66484                | 20131 | 13399 | 6629  | 4650  | 111292 | 59.7%                       | 4.2%                         |
| RXH | Brighton and Sussex University Hospitals NHS Trust              | 12242                | 21734 | 24955 | 22064 | 22751 | 103746 | 11.8%                       | 21.9%                        |
| RXQ | Buckinghamshire Healthcare NHS Trust                            | 375                  | 15533 | 13666 | 16674 | 49949 | 96197  | 0.4%                        | 51.9%                        |
| RJF | Burton Hospitals NHS Foundation Trust                           | 8028                 | 10883 | 13795 | 16333 | 12992 | 62031  | 12.9%                       | 20.9%                        |
| RWY | Calderdale and Huddersfield NHS Foundation Trust                | 26028                | 23462 | 15310 | 19005 | 12625 | 96430  | 27.0%                       | 13.1%                        |
| RGT | Cambridge University Hospitals NHS Foundation Trust             | 1607                 | 10992 | 14338 | 25244 | 42414 | 94595  | 1.7%                        | 44.8%                        |
| RYV | Cambridgeshire Community Services NHS Trust                     | 302                  | 4165  | 10028 | 7652  | 16328 | 38476  | 0.8%                        | 42.4%                        |
| RW3 | Central Manchester University Hospitals NHS Foundation Trust    | 67086                | 27353 | 16708 | 11774 | 8406  | 131327 | 51.1%                       | 6.4%                         |
| RQM | Chelsea and Westminster Hospital NHS Foundation Trust           | 16640                | 26815 | 19308 | 19858 | 6244  | 88865  | 18.7%                       | 7.0%                         |
| RFS | Chesterfield Royal Hospital NHS Foundation Trust                | 11262                | 14747 | 10348 | 11926 | 7507  | 55790  | 20.2%                       | 13.5%                        |
| RBV | Christie Hospital NHS Trust                                     | 86                   | 50    | 0     | 27    | 39    | 202    | 42.5%                       | 19.5%                        |
| RLN | City Hospitals Sunderland NHS Foundation Trust                  | 26687                | 18178 | 8391  | 7604  | 2691  | 63551  | 42.0%                       | 4.2%                         |
| RDE | Colchester Hospital University NHS Foundation Trust             | 7259                 | 16058 | 17471 | 21094 | 12753 | 74634  | 9.7%                        | 17.1%                        |
| RJR | Countess Of Chester Hospital NHS Foundation Trust               | 9307                 | 3990  | 5177  | 9655  | 14849 | 42978  | 21.7%                       | 34.6%                        |
| RXP | County Durham and Darlington NHS Foundation Trust               | 31670                | 30286 | 17175 | 15061 | 12927 | 107119 | 29.6%                       | 12.1%                        |

1  
2  
3  
4  
5  
6  
7  
8  
9  
10  
11  
12  
13  
14  
15  
16  
17  
18  
19  
20  
21  
22  
23  
24  
25  
26  
27  
28  
29  
30  
31  
32  
33  
34  
35  
36  
37  
38  
39  
40  
41  
42  
43  
44  
45  
46  
47  
48  
49  
50  
51  
52  
53  
54  
55  
56  
57  
58  
59  
60

|     |                                                        |       |       |       |       |       |        |       |       |
|-----|--------------------------------------------------------|-------|-------|-------|-------|-------|--------|-------|-------|
| RJ6 | Croydon Health Services NHS Trust                      | 17433 | 28190 | 18334 | 9300  | 4833  | 78090  | 22.3% | 6.2%  |
| RN7 | Dartford and Gravesham NHS Trust                       | 9887  | 18819 | 16535 | 18000 | 15283 | 78523  | 12.6% | 19.5% |
| RTG | Derby Hospitals NHS Foundation Trust                   | 22327 | 19085 | 20936 | 18375 | 24044 | 104768 | 21.3% | 23.0% |
| RP5 | Doncaster and Bassetlaw Hospitals NHS Foundation Trust | 37755 | 22141 | 18484 | 16150 | 3949  | 98480  | 38.3% | 4.0%  |
| RBD | Dorset County Hospital NHS Foundation Trust            | 3473  | 6672  | 15169 | 10100 | 4054  | 39469  | 8.8%  | 10.3% |
| RC3 | Ealing Hospital NHS Trust                              | 13677 | 19798 | 14306 | 3900  | 1139  | 52820  | 25.9% | 2.2%  |
| RWH | East and North Hertfordshire NHS Trust                 | 1696  | 12240 | 25595 | 24728 | 42525 | 106784 | 1.6%  | 39.8% |
| RJN | East Cheshire NHS Trust                                | 1827  | 4965  | 6152  | 6945  | 16141 | 36029  | 5.1%  | 44.8% |
| RVV | East Kent Hospitals University NHS Foundation Trust    | 26345 | 30829 | 35972 | 34287 | 10948 | 138382 | 19.0% | 7.9%  |
| RXR | East Lancashire Hospitals NHS Trust                    | 54726 | 24499 | 11565 | 19053 | 8398  | 118240 | 46.3% | 7.1%  |
| RXC | East Sussex Hospitals NHS Trust                        | 15541 | 20009 | 16409 | 14715 | 7152  | 73828  | 21.1% | 9.7%  |
| RVR | Epsom and St Helier University Hospitals NHS Trust     | 2557  | 14032 | 13354 | 18218 | 33002 | 81162  | 3.1%  | 40.7% |
| RDU | Frimley Park Hospital NHS Trust                        | 826   | 5337  | 11567 | 16677 | 54189 | 88597  | 0.9%  | 61.2% |
| RR7 | Gateshead Health NHS Foundation Trust                  | 15875 | 10622 | 4335  | 5199  | 2210  | 38241  | 41.5% | 5.8%  |
| RLT | George Eliot Hospital NHS Trust                        | 3223  | 6192  | 4042  | 4183  | 2931  | 20570  | 15.7% | 14.2% |
| RTE | Gloucestershire Hospitals NHS Foundation Trust         | 10586 | 14006 | 26234 | 31926 | 37706 | 120459 | 8.8%  | 31.3% |
| RP4 | Great Ormond Street Hospital NHS Trust                 | 2151  | 1616  | 1447  | 1269  | 973   | 7456   | 28.8% | 13.1% |
| RN3 | Great Western Hospitals NHS Foundation Trust           | 8184  | 7123  | 12779 | 22039 | 29222 | 79347  | 10.3% | 36.8% |
| RJ1 | Guy's and St Thomas' NHS Foundation Trust              | 23701 | 29293 | 8915  | 6087  | 3576  | 71571  | 33.1% | 5.0%  |
| RCD | Harrogate and District NHS Foundation Trust            | 492   | 1933  | 7081  | 12804 | 17836 | 40145  | 1.2%  | 44.4% |
| RD7 | Heatherwood and Wexham Park Hosps NHS Foundation Trust | 6085  | 21541 | 23192 | 17741 | 32269 | 100829 | 6.0%  | 32.0% |
| RLQ | Hereford Hospitals NHS Trust                           | 2934  | 4454  | 20545 | 7986  | 2228  | 38147  | 7.7%  | 5.8%  |
| RQQ | Hinchingbrooke Healthcare NHS Trust                    | 12    | 733   | 1351  | 1341  | 3375  | 6811   | 0.2%  | 49.5% |
| RQX | Homerton University Hospital NHS Foundation Trust      | 40697 | 10604 | 673   | 402   | 202   | 52578  | 77.4% | 0.4%  |
| RWA | Hull and East Yorkshire Hospitals NHS Trust            | 35876 | 15750 | 16931 | 18324 | 19804 | 106685 | 33.6% | 18.6% |
| RYJ | Imperial College Healthcare NHS Trust                  | 29567 | 23341 | 11461 | 8231  | 1911  | 74510  | 39.7% | 2.6%  |
| RGQ | Ipswich Hospital NHS Trust                             | 8613  | 8943  | 14027 | 21209 | 18443 | 71234  | 12.1% | 25.9% |
| R1F | Isle of wight NHSTrust                                 | 1970  | 10358 | 10936 | 4519  | 2509  | 30292  | 6.5%  | 8.3%  |
| RGP | James Paget University Hospitals NHS Foundation Trust  | 10958 | 10713 | 11872 | 9138  | 2299  | 44979  | 24.4% | 5.1%  |
| RNQ | Kettering General Hospital NHS Foundation Trust        | 11303 | 15898 | 11852 | 12521 | 17233 | 68806  | 16.4% | 25.0% |
| RJZ | King's College Hospital NHS Foundation Trust           | 42747 | 43266 | 19382 | 20404 | 22300 | 148099 | 28.9% | 15.1% |
| RAX | Kingston Hospital NHS Trust                            | 1675  | 5276  | 10568 | 21191 | 30872 | 69583  | 2.4%  | 44.4% |
| RXN | Lancashire Teaching Hospitals NHS Trust                | 21400 | 14101 | 15110 | 18870 | 19355 | 88836  | 24.1% | 21.8% |
| RR8 | Leeds Teaching Hospitals NHS Trust                     | 59934 | 28280 | 20340 | 22620 | 19424 | 150597 | 39.8% | 12.9% |
| RBQ | Liverpool Heart and Chest NHS Foundation Trust         | 0     | 0     | 26    | 22    | 0     | 47     | 0.0%  | 0.0%  |
| REP | Liverpool Womens Hospital NHS Trust                    | 1707  | 707   | 509   | 394   | 244   | 3561   | 48.0% | 6.9%  |
| R1K | London North West Healthcare NHS Trust                 | 97    | 173   | 141   | 45    | 30    | 486    | 19.9% | 6.2%  |
| RC9 | Luton and Dunstable Hospital NHS Foundation Trust      | 17852 | 24434 | 18167 | 14159 | 21275 | 95886  | 18.6% | 22.2% |
| RWF | Maidstone and Tunbridge Wells NHS Trust                | 2895  | 8897  | 19271 | 33793 | 38600 | 103455 | 2.8%  | 37.3% |

1  
2  
3  
4  
5  
6  
7  
8  
9  
10  
11  
12  
13  
14  
15  
16  
17  
18  
19  
20  
21  
22  
23  
24  
25  
26  
27  
28  
29  
30  
31  
32  
33  
34  
35  
36  
37  
38  
39  
40  
41  
42  
43  
44  
45  
46  
47  
48  
49  
50  
51  
52  
53  
54  
55  
56  
57  
58  
59  
60

|     |                                                               |       |       |       |       |       |        |       |         |
|-----|---------------------------------------------------------------|-------|-------|-------|-------|-------|--------|-------|---------|
| RPA | Medway NHS Trust                                              | 16699 | 28561 | 18476 | 15552 | 13409 | 92696  | 18.0% | 14.5%   |
| RQ8 | Mid Essex Hospital Services NHS Trust                         | 6685  | 14336 | 16855 | 29032 | 34503 | 101410 | 6.6%  | 34.0%   |
| RJD | Mid Staffordshire NHS Foundation Trust                        | 5032  | 9810  | 9988  | 11328 | 11277 | 47435  | 10.6% | 23.8%   |
| RXF | Mid Yorkshire Hospitals NHS Trust                             | 43148 | 38161 | 23923 | 20426 | 9381  | 135040 | 32.0% | 6.9%    |
| RD8 | Milton Keynes Hospital NHS Foundation Trust                   | 10991 | 9702  | 10242 | 20047 | 28400 | 79382  | 13.8% | 35.8%   |
| RP6 | Moorfields Eye Hospital NHS Foundation Trust                  | 127   | 307   | 164   | 197   | 122   | 916    | 13.8% | 13.3%   |
| RTD | Newcastle Upon Tyne Hospitals NHS Foundation Trust            | 40798 | 25120 | 18285 | 17807 | 19648 | 121658 | 33.5% | 16.2%   |
| RM1 | Norfolk and Norwich University Hospitals NHS Foundation Trust | 9602  | 17400 | 32943 | 30205 | 24011 | 114161 | 8.4%  | 21.0%   |
| RVJ | North Bristol NHS Trust                                       | 5764  | 8515  | 9992  | 9720  | 14502 | 48493  | 11.9% | 29.9%   |
| RNL | North Cumbria University Hospitals NHS Trust                  | 12195 | 15376 | 17853 | 13491 | 7719  | 66633  | 18.3% | 11.6%   |
| RJL | North Lincolnshire and Goole Hospitals NHS Foundation Trust   | 27606 | 16268 | 17235 | 18122 | 8671  | 87901  | 31.4% | 9.9%    |
| RAP | North Middlesex University Hospital NHS Trust                 | 44361 | 20500 | 5193  | 3151  | 1365  | 74570  | 59.5% | 1.8%    |
| RVW | North Tees and Hartlepool NHS Foundation Trust                | 26629 | 10795 | 8422  | 6195  | 9527  | 61569  | 43.3% | 15.5%   |
| RV8 | North West London Hospitals NHS Trust                         | 16283 | 39133 | 36738 | 17588 | 10523 | 120266 | 13.5% | 8.7%    |
| RNS | Northampton General Hospital NHS Trust                        | 13830 | 14358 | 12007 | 14485 | 25316 | 79996  | 17.3% | 31.6%   |
| RBZ | Northern Devon Healthcare NHS Trust                           | 2620  | 10607 | 13149 | 7557  | 1214  | 35147  | 7.5%  | 3.5%    |
| RTF | Northumbria Healthcare NHS Foundation Trust                   | 17976 | 17426 | 10150 | 9092  | 12507 | 67151  | 26.8% | 18.6%   |
| RX1 | Nottingham University Hospitals NHS Trust                     | 46374 | 32241 | 27468 | 27039 | 36456 | 169578 | 27.3% | 21.5%   |
| RTH | Oxford Radcliffe Hospital NHS Trust                           | 9278  | 14348 | 26218 | 36663 | 66280 | 152788 | 6.1%  | 43.4%   |
| RGM | Papworth Hospital NHS Foundation Trust                        | .     | 26    | 9     | 25    | 0     | 60     | .     | 0.0%    |
| RW6 | Pennine Acute Hospitals NHS Trust                             | 88802 | 32682 | 23049 | 19382 | 10401 | 174316 | 50.9% | 6.0%    |
| RGN | Peterborough and Stamford Hospitals NHS Foundation Trust      | 18004 | 12188 | 13929 | 18527 | 15847 | 78495  | 22.9% | 20.2%   |
| RK9 | Plymouth Hospitals NHS Trust                                  | 16869 | 22361 | 23327 | 22143 | 9054  | 93753  | 18.0% | 9.7%    |
| RD3 | Poole Hospital NHS Foundation Trust                           | 7818  | 19911 | 24083 | 21328 | 23941 | 97080  | 8.1%  | 24.7%   |
| RHU | Portsmouth Hospitals NHS Trust                                | 23318 | 22744 | 22627 | 27470 | 28665 | 124823 | 18.7% | 23.0%   |
| RQW | Princess Alexandra Hospital NHS Trust                         | 2053  | 16719 | 10267 | 13604 | 20024 | 62667  | 3.3%  | 32.0%   |
| RCX | Queen Elizabeth Hospital Kings Lynn NHS Foundation Trust      | 6726  | 15266 | 15078 | 5765  | 3199  | 46035  | 14.6% | 6.9%    |
| RPC | Queen Victoria Hospital NHS Foundation Trust                  | 2846  | 4759  | 6532  | 8203  | 9878  | 32219  | 8.8%  | 30.7%   |
| RL1 | Robert Jones and Agnes Hunt Orthopaedic NHS Trust             | .     | .     | 68    | 0     | 0     | 68     | .     | 0.0%    |
| RHW | Royal Berkshire Hospital NHS Foundation Trust                 | 5565  | 12862 | 13701 | 18695 | 50746 | 101569 | 5.5%  | 50.0%   |
| RMC | Royal Bolton Hospital NHS Foundation Trust                    | 37825 | 16742 | 11573 | 9984  | 7953  | 84077  | 45.0% | 9.5%    |
| RDZ | Royal Bournemouth and Christchurch Trust                      | 552   | 1221  | 1091  | 1222  | 1577  | 5662   | 9.7%  | 27.9%   |
| RT3 | Royal Brompton and Harefield NHS Foundation Trust             | 627   | 863   | 727   | 783   | 825   | 3825   | 16.4% | 21.6%   |
| REF | Royal Cornwall Hospitals NHS Trust                            | 11834 | 35049 | 31587 | 10025 | 3147  | 91643  | 12.9% | 3.4%    |
| RH8 | Royal Devon and Exeter NHS Foundation Trust                   | 5002  | 14847 | 25290 | 21990 | 8391  | 75519  | 6.6%  | 11.1%   |
| RAL | Royal Free Hampstead NHS Trust                                | 7307  | 12331 | 11797 | 13302 | 3487  | 48224  | 15.2% | 7.2%    |
| RQ6 | Royal Liverpool Broadgreen Hospitals NHS Trust                | 7758  | 1640  | 1285  | 1043  | 651   | 12377  | 62.7% | 5.3%    |
| RRJ | Royal Orthopaedic Hospital NHS Foundation Trust               | 165   | 20    | 46    | 61    | .     | 293    | 56.5% | #VALUE! |

|    |     |                                                               |       |       |       |       |       |        |       |       |
|----|-----|---------------------------------------------------------------|-------|-------|-------|-------|-------|--------|-------|-------|
| 1  |     |                                                               |       |       |       |       |       |        |       |       |
| 2  |     |                                                               |       |       |       |       |       |        |       |       |
| 3  | RA2 | Royal Surrey County NHS Foundation Trust                      | 130   | 3177  | 7736  | 16241 | 41419 | 68703  | 0.2%  | 60.3% |
| 4  | RD1 | Royal United Hospital Bath NHS Trust                          | 3564  | 10934 | 20295 | 24708 | 33703 | 93205  | 3.8%  | 36.2% |
| 5  | RL4 | Royal Wolverhampton Hospital NHS Trust                        | 38204 | 14598 | 10037 | 9724  | 6583  | 79145  | 48.3% | 8.3%  |
| 6  |     |                                                               |       |       |       |       |       |        |       |       |
| 7  | RM3 | Salford Royal NHS Foundation Trust                            | 14387 | 8964  | 5303  | 3709  | 2317  | 34678  | 41.5% | 6.7%  |
| 8  | RNZ | Salisbury NHS Foundation Trust                                | 1844  | 2912  | 12705 | 15200 | 14957 | 47618  | 3.9%  | 31.4% |
| 9  | RXK | Sandwell and West Birmingham Hospitals NHS Trust              | 63925 | 19339 | 10871 | 2795  | 1467  | 98396  | 65.0% | 1.5%  |
| 10 |     |                                                               |       |       |       |       |       |        |       |       |
| 11 | RCU | Sheffield Children's NHS Foundation Trust                     | 47093 | 18165 | 18857 | 16951 | 16482 | 117548 | 40.1% | 14.0% |
| 12 | RHQ | Sheffield Teaching Hospitals NHS Foundation Trust             | 7293  | 3134  | 2764  | 2585  | 3630  | 19406  | 37.6% | 18.7% |
| 13 |     |                                                               |       |       |       |       |       |        |       |       |
| 14 | RK5 | Sherwood Forest Hospitals NHS Foundation Trust                | 22234 | 19767 | 13387 | 10059 | 4664  | 70109  | 31.7% | 6.7%  |
| 15 | RXW | Shrewsbury and Telford Hospital NHS Trust                     | 13908 | 23151 | 27882 | 21270 | 14428 | 100641 | 13.8% | 14.3% |
| 16 |     |                                                               |       |       |       |       |       |        |       |       |
| 17 | RA9 | South Devon Health Care NHS Trust                             | 6256  | 14054 | 17329 | 10014 | 3256  | 50908  | 12.3% | 6.4%  |
| 18 | RYQ | South London Healthcare NHS Trust                             | 15076 | 12342 | 5257  | 3938  | 3217  | 39830  | 37.8% | 8.1%  |
| 19 | RTR | South Tees Hospitals NHS Foundation Trust                     | 35008 | 14193 | 11757 | 21000 | 16022 | 97981  | 35.7% | 16.4% |
| 20 |     |                                                               |       |       |       |       |       |        |       |       |
| 21 | RE9 | South Tyneside NHS Foundation Trust                           | 10715 | 5681  | 3984  | 1815  | 2105  | 24299  | 44.1% | 8.7%  |
| 22 | RJC | South Warwickshire NHS Foundation Trust                       | 614   | 4058  | 7501  | 14302 | 20994 | 47468  | 1.3%  | 44.2% |
| 23 |     |                                                               |       |       |       |       |       |        |       |       |
| 24 | RHM | Southampton University Hospitals NHS Trust                    | 17134 | 19498 | 23922 | 23325 | 33332 | 117210 | 14.6% | 28.4% |
| 25 | RAJ | Southend University Hospitals NHS Foundation Trust            | 10337 | 13071 | 12891 | 13934 | 18062 | 68295  | 15.1% | 26.4% |
| 26 |     |                                                               |       |       |       |       |       |        |       |       |
| 27 | RVY | Southport and Ormskirk Hospital NHS Trust                     | 9752  | 9350  | 11853 | 12368 | 8518  | 51841  | 18.8% | 16.4% |
| 28 | RJ7 | St George's Healthcare NHS Trust                              | 10665 | 35308 | 27079 | 18100 | 21974 | 113127 | 9.4%  | 19.4% |
| 29 | RBN | St Helens and Knowsley Hospitals NHS Trust                    | 31345 | 11877 | 10356 | 6307  | 6100  | 65986  | 47.5% | 9.2%  |
| 30 |     |                                                               |       |       |       |       |       |        |       |       |
| 31 | RWJ | Stockport NHS Foundation Trust                                | 9769  | 12674 | 13387 | 13047 | 16979 | 65856  | 14.8% | 25.8% |
| 32 | RTP | Surrey and Sussex Healthcare NHS Trust                        | 1107  | 9346  | 21853 | 22473 | 38401 | 93180  | 1.2%  | 41.2% |
| 33 |     |                                                               |       |       |       |       |       |        |       |       |
| 34 | RMP | Tameside Hospital NHS Foundation Trust                        | 18817 | 12474 | 7684  | 5939  | 2963  | 47877  | 39.3% | 6.2%  |
| 35 | RBA | Taunton and Somerset NHS Foundation Trust                     | 3979  | 15818 | 20692 | 15615 | 10424 | 66528  | 6.0%  | 15.7% |
| 36 |     |                                                               |       |       |       |       |       |        |       |       |
| 37 | RNA | The Dudley Group Of Hospitals NHS Foundation Trust            | 26610 | 20047 | 10763 | 12208 | 11188 | 80817  | 32.9% | 13.8% |
| 38 | RAS | The Hillingdon Hospital NHS Trust                             | 7023  | 25504 | 15414 | 8142  | 5115  | 61198  | 11.5% | 8.4%  |
| 39 | RJ2 | The Lewisham Healthcare NHS Trust                             | 38471 | 37675 | 14761 | 7280  | 5094  | 103280 | 37.2% | 4.9%  |
| 40 |     |                                                               |       |       |       |       |       |        |       |       |
| 41 | RBT | The Mid Cheshire Hospitals NHS Trust                          | 9058  | 10142 | 9194  | 10396 | 19172 | 57962  | 15.6% | 33.1% |
| 42 | RFR | The Rotherham NHS Foundation Trust                            | 20623 | 13100 | 7143  | 7545  | 1935  | 50347  | 41.0% | 3.8%  |
| 43 |     |                                                               |       |       |       |       |       |        |       |       |
| 44 | RPY | The Royal Marsden NHS Foundation Trust                        | 0     | 107   | 53    | 42    | 147   | 348    | 0.0%  | 42.1% |
| 45 | RAN | The Royal National Orthopaedic Hospital NHS Trust             | 42    | 52    | 50    | 117   | 28    | 289    | 14.5% | 9.7%  |
| 46 | RET | The Walton Centre NHS Foundation Trust                        | 83    | 36    | 50    | 56    | 31    | 255    | 32.7% | 12.1% |
| 47 |     |                                                               |       |       |       |       |       |        |       |       |
| 48 | RWD | United Lincolnshire Hospitals NHS Trust                       | 18063 | 25037 | 28269 | 25315 | 19240 | 115924 | 15.6% | 16.6% |
| 49 | RRV | University College London Hospitals NHS Foundation Trust      | 16229 | 15333 | 5927  | 3409  | 1882  | 42780  | 37.9% | 4.4%  |
| 50 |     |                                                               |       |       |       |       |       |        |       |       |
| 51 | RRK | University Hospital Birmingham NHS Foundation Trust           | 5027  | 2439  | 2473  | 1089  | 1079  | 12108  | 41.5% | 8.9%  |
| 52 |     |                                                               |       |       |       |       |       |        |       |       |
| 53 | RJE | University Hospital Of North Staffordshire Hospital NHS Trust | 39874 | 20414 | 19693 | 20464 | 10260 | 110705 | 36.0% | 9.3%  |
| 54 | RM2 | University Hospital Of South Manchester NHS Foundation Trust  | 21407 | 9078  | 9600  | 13012 | 17798 | 70896  | 30.2% | 25.1% |
| 55 |     |                                                               |       |       |       |       |       |        |       |       |
| 56 | RKB | University Hospitals Coventry and Warwickshire NHS Trust      | 31965 | 29721 | 24664 | 22049 | 18122 | 126521 | 25.3% | 14.3% |
| 57 |     |                                                               |       |       |       |       |       |        |       |       |
| 58 |     |                                                               |       |       |       |       |       |        |       |       |
| 59 |     |                                                               |       |       |       |       |       |        |       |       |
| 60 |     |                                                               |       |       |       |       |       |        |       |       |



|    |     |                                                            |       |       |       |       |       |        |       |       |
|----|-----|------------------------------------------------------------|-------|-------|-------|-------|-------|--------|-------|-------|
| 1  |     |                                                            |       |       |       |       |       |        |       |       |
| 2  |     |                                                            |       |       |       |       |       |        |       |       |
| 3  | RA7 | University Hospitals Of Bristol NHS Foundation Trust       | 26346 | 29029 | 24462 | 28807 | 36544 | 145188 | 18.1% | 25.2% |
| 4  | RWE | University Hospitals Of Leicester NHS Trust                | 39869 | 40317 | 28191 | 33490 | 47997 | 189865 | 21.0% | 25.3% |
| 5  |     |                                                            |       |       |       |       |       |        |       |       |
| 6  | RTX | University Hospitals Of Morecambe Bay NHS Foundation Trust | 13063 | 11495 | 15298 | 18906 | 9232  | 67995  | 19.2% | 13.6% |
| 7  | RBK | Walsall Hospitals NHS Trust                                | 29584 | 12247 | 5952  | 4564  | 4104  | 56452  | 52.4% | 7.3%  |
| 8  | RWW | Warrington and Halton Hospitals NHS Foundation Trust       | 18402 | 9610  | 6976  | 12122 | 14661 | 61770  | 29.8% | 23.7% |
| 9  |     |                                                            |       |       |       |       |       |        |       |       |
| 10 | RWG | West Hertfordshire Hospitals NHS Trust                     | 909   | 13213 | 22267 | 19887 | 41210 | 97486  | 0.9%  | 42.3% |
| 11 | RFW | West Middlesex University NHS Trust                        | 5688  | 22475 | 16883 | 13284 | 9100  | 67430  | 8.4%  | 13.5% |
| 12 | RGR | West Suffolk Hospital NHS Trust                            | 1041  | 8425  | 12183 | 24686 | 10844 | 57180  | 1.8%  | 19.0% |
| 13 |     |                                                            |       |       |       |       |       |        |       |       |
| 14 | RYR | WesternSussexHospitals NHS Trust                           | 6118  | 15486 | 30143 | 22225 | 17797 | 91769  | 6.7%  | 19.4% |
| 15 | RA3 | Weston Area Health NHSTrust                                | 2191  | 1714  | 2146  | 4229  | 2258  | 12538  | 17.5% | 18.0% |
| 16 | RKE | Whittington Hospital NHSTrust                              | 19614 | 18465 | 8121  | 4161  | 950   | 51311  | 38.2% | 1.9%  |
| 17 | RBL | Wirral University Teaching Hospital NHS Foundation Trust   | 25451 | 12912 | 10107 | 10590 | 13683 | 72743  | 35.0% | 18.8% |
| 18 | RWP | Worcestershire Acute Hospitals NHS Trust                   | 15580 | 17043 | 26647 | 31527 | 26507 | 117303 | 13.3% | 22.6% |
| 19 |     |                                                            |       |       |       |       |       |        |       |       |
| 20 | RRF | Wrightington, Wigan and Leigh NHS Foundation Trust         | 18005 | 11544 | 7010  | 8788  | 6943  | 52291  | 34.4% | 13.3% |
| 21 |     |                                                            |       |       |       |       |       |        |       |       |
| 22 | RA4 | Yeovil District Hospital NHS Foundation Trust              | 1302  | 4053  | 11256 | 15046 | 5942  | 37598  | 3.5%  | 15.8% |
| 23 | RCB | York Hospitals NHSTrust                                    | 12363 | 15726 | 20085 | 25537 | 29526 | 103237 | 12.0% | 28.6% |
| 24 |     |                                                            |       |       |       |       |       |        |       |       |
| 25 |     |                                                            |       |       |       |       |       |        |       |       |
| 26 |     |                                                            |       |       |       |       |       |        |       |       |
| 27 |     |                                                            |       |       |       |       |       |        |       |       |
| 28 |     |                                                            |       |       |       |       |       |        |       |       |
| 29 |     |                                                            |       |       |       |       |       |        |       |       |
| 30 |     |                                                            |       |       |       |       |       |        |       |       |
| 31 |     |                                                            |       |       |       |       |       |        |       |       |
| 32 |     |                                                            |       |       |       |       |       |        |       |       |
| 33 |     |                                                            |       |       |       |       |       |        |       |       |
| 34 |     |                                                            |       |       |       |       |       |        |       |       |
| 35 |     |                                                            |       |       |       |       |       |        |       |       |
| 36 |     |                                                            |       |       |       |       |       |        |       |       |
| 37 |     |                                                            |       |       |       |       |       |        |       |       |
| 38 |     |                                                            |       |       |       |       |       |        |       |       |
| 39 |     |                                                            |       |       |       |       |       |        |       |       |
| 40 |     |                                                            |       |       |       |       |       |        |       |       |
| 41 |     |                                                            |       |       |       |       |       |        |       |       |
| 42 |     |                                                            |       |       |       |       |       |        |       |       |
| 43 |     |                                                            |       |       |       |       |       |        |       |       |
| 44 |     |                                                            |       |       |       |       |       |        |       |       |
| 45 |     |                                                            |       |       |       |       |       |        |       |       |
| 46 |     |                                                            |       |       |       |       |       |        |       |       |
| 47 |     |                                                            |       |       |       |       |       |        |       |       |
| 48 |     |                                                            |       |       |       |       |       |        |       |       |
| 49 |     |                                                            |       |       |       |       |       |        |       |       |
| 50 |     |                                                            |       |       |       |       |       |        |       |       |
| 51 |     |                                                            |       |       |       |       |       |        |       |       |
| 52 |     |                                                            |       |       |       |       |       |        |       |       |
| 53 |     |                                                            |       |       |       |       |       |        |       |       |
| 54 |     |                                                            |       |       |       |       |       |        |       |       |
| 55 |     |                                                            |       |       |       |       |       |        |       |       |
| 56 |     |                                                            |       |       |       |       |       |        |       |       |
| 57 |     |                                                            |       |       |       |       |       |        |       |       |
| 58 |     |                                                            |       |       |       |       |       |        |       |       |
| 59 |     |                                                            |       |       |       |       |       |        |       |       |
| 60 |     |                                                            |       |       |       |       |       |        |       |       |

Appendix Table A4

Paediatric hospital catchment populations by Trust, age group, English Hospital Episode Statistics, 2013/14

| Trustcode | Trust name                                                      | Region                      | Catchment population by age group |       |       |       |       | Total  | % 0-3s |
|-----------|-----------------------------------------------------------------|-----------------------------|-----------------------------------|-------|-------|-------|-------|--------|--------|
|           |                                                                 |                             | 0-3                               | 4-7   | 8-11  | 12-15 | 16-18 |        |        |
| REM       | Aintree University Hospitals NHS Foundation Trust               | North East<br>Yorkshire and | 1818                              | 1744  | 1644  | 1883  | 1541  | 8631   | 21.1%  |
| RCF       | Airedale NHS Foundation Trust                                   | The Humber                  | 9281                              | 9223  | 8924  | 9434  | 7106  | 43968  | 21.1%  |
| RBS       | Alder Hey Childrens NHS Foundation Trust                        | North West                  | 30231                             | 27712 | 25622 | 28417 | 23244 | 135226 | 22.4%  |
| RTK       | Ashford and St Peter's Hospitals NHS Foundation Trust           | North East                  | 16376                             | 14965 | 13101 | 13060 | 10213 | 67714  | 24.2%  |
| RF4       | Barking, Havering and Redbridge University Hospitals NHS Trust  | North West                  | 34684                             | 33081 | 28805 | 29641 | 22922 | 149133 | 23.3%  |
| RVL       | Barnet and Chase Farm Hospitals NHS Trust                       | North West                  | 26673                             | 24951 | 21694 | 22451 | 17325 | 113094 | 23.6%  |
| RFF       | Barnsley Dist Gen Hosp NHS Foundation Trust                     | North West                  | 11289                             | 10815 | 9764  | 10761 | 8536  | 51165  | 22.1%  |
| R1H       | Barts Health NHS Trust                                          | London                      | 69552                             | 60372 | 51954 | 50043 | 38322 | 270243 | 25.7%  |
| RDD       | Basildon and Thurrock University Hospitals NHS Foundation Trust | South Central               | 16850                             | 16379 | 14775 | 15694 | 12277 | 75975  | 22.2%  |
| RN5       | Basingstoke and North Hampshire Hospitals NHS Foundation Trust  | North West                  | 21759                             | 21503 | 19827 | 21349 | 16999 | 101435 | 21.5%  |
| RC1       | Bedford Hospital NHS Trust                                      | South West                  | 7063                              | 6759  | 6401  | 6780  | 5281  | 32284  | 21.9%  |
| RQ3       | Birmingham Children's Hospital NHS Foundation Trust             | South East<br>Coast         | 37027                             | 34991 | 31558 | 32992 | 25507 | 162074 | 22.8%  |
| RR1       | Birmingham Heartlands and Solihull Trust                        | East of England             | 37763                             | 37085 | 34660 | 36620 | 27490 | 173618 | 21.8%  |
| RLU       | Birmingham Women's NHS Foundation Trust                         | North East                  | 587                               | 548   | 496   | 509   | 386   | 2526   | 23.3%  |
| RXL       | Blackpool Fylde and Wyre NHS Foundation Trust                   | Yorkshire and<br>The Humber | 12381                             | 12441 | 11440 | 12976 | 10323 | 59561  | 20.8%  |
| RAE       | Bradford Teaching Hospitals NHS Foundation Trust                | Yorkshire and<br>The Humber | 25750                             | 24585 | 22183 | 22373 | 16401 | 111292 | 23.1%  |
| RXH       | Brighton and Sussex University Hospitals NHS Trust              | East Midlands               | 22502                             | 21982 | 20756 | 21621 | 16885 | 103746 | 21.7%  |
| RXQ       | Buckinghamshire Healthcare NHS Trust                            | North West                  | 20687                             | 20445 | 19419 | 20336 | 15309 | 96197  | 21.5%  |
| RJF       | Burton Hospitals NHS Foundation Trust                           | West Midlands               | 13021                             | 12902 | 12449 | 13285 | 10375 | 62031  | 21.0%  |
| RWY       | Calderdale and Huddersfield NHS Foundation Trust                | North West                  | 21300                             | 20517 | 18846 | 20073 | 15695 | 96430  | 22.1%  |
| RGT       | Cambridge University Hospitals NHS Foundation Trust             | East of England             | 20880                             | 19974 | 18545 | 19299 | 15897 | 94595  | 22.1%  |
| RYV       | Cambridgeshire Community Services NHS Trust                     | London                      | 8235                              | 7965  | 7611  | 8290  | 6375  | 38476  | 21.4%  |
| RW3       | Central Manchester University Hospitals NHS Foundation Trust    | South East<br>Coast         | 31203                             | 28764 | 24888 | 25753 | 20719 | 131327 | 23.8%  |
| RQM       | Chelsea and Westminster Hospital NHS Foundation Trust           | West Midlands               | 24795                             | 20579 | 16881 | 15348 | 11263 | 88865  | 27.9%  |
| RFS       | Chesterfield Royal Hospital NHS Foundation Trust                | London                      | 11240                             | 11335 | 10693 | 12389 | 10133 | 55790  | 20.1%  |
| RBV       | Christie Hospital NHS Trust                                     | North West                  | 45                                | 46    | 39    | 41    | 31    | 202    | 22.5%  |
| RLN       | City Hospitals Sunderland NHS Foundation Trust                  | London                      | 13729                             | 13180 | 12033 | 13529 | 11081 | 63551  | 21.6%  |
| RDE       | Colchester Hospital University NHS Foundation Trust             | South Central               | 15906                             | 15463 | 14685 | 16014 | 12567 | 74634  | 21.3%  |
| RJR       | Countess Of Chester Hospital NHS Foundation Trust               | West Midlands               | 8830                              | 9025  | 8486  | 9374  | 7263  | 42978  | 20.5%  |
| RXP       | County Durham and Darlington NHS Foundation Trust               | West Midlands               | 23118                             | 22459 | 20601 | 22955 | 17986 | 107119 | 21.6%  |
| RJ6       | Croydon Health Services NHS Trust                               | South Central               | 19036                             | 17326 | 14621 | 15127 | 11979 | 78090  | 24.4%  |
| RN7       | Dartford and Gravesham NHS Trust                                | North West                  | 17567                             | 16621 | 15111 | 16282 | 12942 | 78523  | 22.4%  |
| RTG       | Derby Hospitals NHS Foundation Trust                            | North East                  | 22804                             | 22075 | 20463 | 22140 | 17286 | 104768 | 21.8%  |

1  
2  
3  
4  
5  
6  
7  
8  
9  
10  
11  
12  
13  
14  
15  
16  
17  
18  
19  
20  
21  
22  
23  
24  
25  
26  
27  
28  
29  
30  
31  
32  
33  
34  
35  
36  
37  
38  
39  
40  
41  
42  
43  
44  
45  
46  
47  
48  
49  
50  
51  
52  
53  
54  
55  
56  
57  
58  
59  
60

|     |                                                        |                          |       |       |       |       |       |        |       |
|-----|--------------------------------------------------------|--------------------------|-------|-------|-------|-------|-------|--------|-------|
| RP5 | Doncaster and Bassetlaw Hospitals NHS Foundation Trust | East Midlands            | 21433 | 20734 | 18777 | 20817 | 16720 | 98480  | 21.8% |
| RBD | Dorset County Hospital NHS Foundation Trust            | South West               | 7730  | 7900  | 7822  | 9036  | 6981  | 39469  | 19.6% |
| RC3 | Ealing Hospital NHS Trust                              | East of England          | 13404 | 11827 | 9917  | 9982  | 7690  | 52820  | 25.4% |
| RWH | East and North Hertfordshire NHS Trust                 | East Midlands            | 24087 | 22624 | 20756 | 21912 | 17405 | 106784 | 22.6% |
| RJN | East Cheshire NHS Trust                                | West Midlands            | 7386  | 7518  | 7181  | 8057  | 5886  | 36029  | 20.5% |
| RVV | East Kent Hospitals University NHS Foundation Trust    | South West               | 28405 | 28069 | 27047 | 30898 | 23963 | 138382 | 20.5% |
| RXR | East Lancashire Hospitals NHS Trust                    | North West               | 26277 | 25355 | 23365 | 24195 | 19048 | 118240 | 22.2% |
| RXC | East Sussex Hospitals NHS Trust                        | North West               | 15344 | 14850 | 14236 | 16419 | 12978 | 73828  | 20.8% |
| RVR | Epsom and St Helier University Hospitals NHS Trust     | London                   | 18036 | 17199 | 15795 | 17055 | 13076 | 81162  | 22.2% |
| RDU | Frimley Park Hospital NHS Trust                        | East of England          | 19009 | 18998 | 17419 | 18685 | 14485 | 88597  | 21.5% |
| RR7 | Gateshead Health NHS Foundation Trust                  | East of England          | 8547  | 7992  | 7290  | 7895  | 6517  | 38241  | 22.4% |
| RLT | George Eliot Hospital NHS Trust                        | West Midlands            | 4483  | 4249  | 3997  | 4351  | 3490  | 20570  | 21.8% |
| RTE | Gloucestershire Hospitals NHS Foundation Trust         | London                   | 25140 | 24496 | 23744 | 26056 | 21022 | 120459 | 20.9% |
| RP4 | Great Ormond Street Hospital NHS Trust                 | East Midlands            | 1819  | 1658  | 1425  | 1443  | 1111  | 7456   | 24.4% |
| RN3 | Great Western Hospitals NHS Foundation Trust           | North West               | 16945 | 16583 | 15601 | 16993 | 13226 | 79347  | 21.4% |
| RJ1 | Guy's and St Thomas' NHS Foundation Trust              | Yorkshire and The Humber | 18653 | 15903 | 13342 | 13289 | 10384 | 71571  | 26.1% |
| RCD | Harrogate and District NHS Foundation Trust            | Yorkshire and The Humber | 7954  | 8302  | 8076  | 8630  | 7183  | 40145  | 19.8% |
| RD7 | Heatherwood and Wexham Park Hosps NHS Foundation Trust | South West               | 23647 | 22231 | 19614 | 20153 | 15184 | 100829 | 23.5% |
| RLQ | Hereford Hospitals NHS Trust                           | West Midlands            | 7844  | 7663  | 7492  | 8498  | 6650  | 38147  | 20.6% |
| RQQ | Hinchingbrooke Healthcare NHS Trust                    | North West               | 1413  | 1397  | 1349  | 1492  | 1160  | 6811   | 20.7% |
| RQX | Homerton University Hospital NHS Foundation Trust      | London                   | 13796 | 11963 | 10167 | 9635  | 7017  | 52578  | 26.2% |
| RWA | Hull and East Yorkshire Hospitals NHS Trust            | North West               | 23323 | 22196 | 20393 | 22278 | 18495 | 106685 | 21.9% |
| RJY | Imperial College Healthcare NHS Trust                  | South Central            | 19767 | 16580 | 14287 | 13669 | 10208 | 74510  | 26.5% |
| RGQ | Ipswich Hospital NHS Trust                             | East of England          | 14563 | 14705 | 13911 | 15774 | 12282 | 71234  | 20.4% |
| R1F | Isle of wight NHSTrust                                 | South Central            | 5868  | 6025  | 5909  | 6954  | 5536  | 30292  | 19.4% |
| RGP | James Paget University Hospitals NHS Foundation Trust  | London                   | 9501  | 9074  | 8733  | 9664  | 8008  | 44979  | 21.1% |
| RNQ | Kettering General Hospital NHS Foundation Trust        | South East Coast         | 15249 | 14782 | 13456 | 14226 | 11094 | 68806  | 22.2% |
| RJZ | King's College Hospital NHS Foundation Trust           | Yorkshire and The Humber | 36878 | 32843 | 28353 | 28515 | 21510 | 148099 | 24.9% |
| RAX | Kingston Hospital NHS Trust                            | London                   | 17675 | 15747 | 13362 | 13077 | 9721  | 69583  | 25.4% |
| RXN | Lancashire Teaching Hospitals NHS Trust                | South East Coast         | 19428 | 18873 | 17358 | 18576 | 14600 | 88836  | 21.9% |
| RR8 | Leeds Teaching Hospitals NHS Trust                     | London                   | 36478 | 32264 | 28161 | 29234 | 24461 | 150597 | 24.2% |
| RBQ | Liverpool Heart and Chest NHS Foundation Trust         | North West               | 11    | 9     | 9     | 11    | 8     | 47     | 22.8% |
| REP | Liverpool Womens Hospital NHS Trust                    | South West               | 801   | 730   | 673   | 757   | 600   | 3561   | 22.5% |
| R1K | London North West Healthcare NHS Trust                 | London                   | 123   | 107   | 93    | 92    | 72    | 486    | 25.4% |
| RC9 | Luton and Dunstable Hospital NHS Foundation Trust      | London                   | 22229 | 21177 | 18857 | 18930 | 14694 | 95886  | 23.2% |
| RWF | Maidstone and Tunbridge Wells NHS Trust                | Yorkshire and The Humber | 20979 | 21734 | 20928 | 22499 | 17316 | 103455 | 20.3% |
| RPA | Medway NHS Trust                                       | London                   | 20258 | 19145 | 18099 | 19678 | 15517 | 92696  | 21.9% |
| RQ8 | Mid Essex Hospital Services NHS Trust                  | London                   | 21569 | 21406 | 20268 | 21536 | 16631 | 101410 | 21.3% |
| RJD | Mid Staffordshire NHS Foundation Trust                 | London                   | 9750  | 9928  | 9232  | 10356 | 8170  | 47435  | 20.6% |
| RXF | Mid Yorkshire Hospitals NHS Trust                      | Yorkshire and The Humber | 30208 | 28588 | 26432 | 28005 | 21806 | 135039 | 22.4% |

1  
2  
3  
4  
5  
6  
7  
8  
9  
10  
11  
12  
13  
14  
15  
16  
17  
18  
19  
20  
21  
22  
23  
24  
25  
26  
27  
28  
29  
30  
31  
32  
33  
34  
35  
36  
37  
38  
39  
40  
41  
42  
43  
44  
45  
46  
47  
48  
49  
50  
51  
52  
53  
54  
55  
56  
57  
58  
59  
60

|     |                                                               |                                           |       |       |       |       |       |        |       |
|-----|---------------------------------------------------------------|-------------------------------------------|-------|-------|-------|-------|-------|--------|-------|
| RD8 | Milton Keynes Hospital NHS Foundation Trust                   | South West                                | 18353 | 17473 | 15472 | 15976 | 12108 | 79382  | 23.1% |
| RP6 | Moorfields Eye Hospital NHS Foundation Trust                  | South West                                | 240   | 200   | 172   | 169   | 135   | 916    | 26.2% |
| RTD | Newcastle Upon Tyne Hospitals NHS Foundation Trust            | West Midlands                             | 26463 | 25348 | 23593 | 25451 | 20803 | 121658 | 21.8% |
| RM1 | Norfolk and Norwich University Hospitals NHS Foundation Trust | West Midlands                             | 24191 | 23315 | 21946 | 24782 | 19927 | 114161 | 21.2% |
| RVJ | North Bristol NHSTrust                                        | North East                                | 10772 | 10160 | 9320  | 10168 | 8073  | 48493  | 22.2% |
| RNL | North Cumbria University Hospitals NHS Trust                  | South Central                             | 13759 | 13640 | 13119 | 14489 | 11626 | 66633  | 20.6% |
| RJL | North Lincolnshire and Goole Hosps NHS Foundation Trust       | West Midlands                             | 19088 | 18665 | 16976 | 18374 | 14798 | 87901  | 21.7% |
| RAP | North Middlesex University Hospital NHS Trust                 | London                                    | 17728 | 16530 | 14485 | 14713 | 11114 | 74570  | 23.8% |
| RVW | North Tees and Hartlepool NHS Foundation Trust                | London<br>South East Coast                | 13438 | 13002 | 11697 | 12891 | 10540 | 61569  | 21.8% |
| RV8 | North West London Hospitals NHSTrust                          | Coast                                     | 28440 | 25812 | 23032 | 24078 | 18904 | 120266 | 23.6% |
| RNS | Northampton General Hospital NHS Trust                        | West Midlands                             | 18338 | 17443 | 15690 | 16008 | 12517 | 79996  | 22.9% |
| RBZ | Northern Devon Healthcare NHS Trust                           | North West                                | 7353  | 7094  | 6883  | 7687  | 6131  | 35147  | 20.9% |
| RTF | Northumbria Healthcare NHS Foundation Trust                   | London                                    | 14215 | 14128 | 13235 | 14280 | 11293 | 67151  | 21.2% |
| RX1 | Nottingham University Hospitals NHS Trust                     | West Midlands                             | 38032 | 36177 | 32352 | 34749 | 28267 | 169578 | 22.4% |
| RTH | Oxford Radcliffe Hospital NHS Trust                           | South West<br>Yorkshire and<br>The Humber | 34060 | 32439 | 29623 | 31839 | 24828 | 152788 | 22.3% |
| RGM | Papworth Hospital NHS Foundation Trust                        | The Humber                                | 16    | 13    | 12    | 12    | 8     | 60     | 26.0% |
| RW6 | Pennine Acute Hospitals NHS Trust                             | North East                                | 40044 | 38040 | 33963 | 35296 | 26974 | 174316 | 23.0% |
| RGN | Peterborough and Stamford Hospitals NHS Foundation Trust      | East Midlands                             | 17474 | 16140 | 15033 | 16632 | 13216 | 78495  | 22.3% |
| RK9 | Plymouth Hospitals NHS Trust                                  | North West                                | 20142 | 19268 | 17833 | 20227 | 16284 | 93753  | 21.5% |
| RD3 | Poole Hospital NHS Foundation Trust                           | East of England                           | 21138 | 20146 | 18714 | 20732 | 16350 | 97080  | 21.8% |
| RHU | Portsmouth Hospitals NHS Trust                                | South West                                | 26999 | 26037 | 24156 | 26522 | 21110 | 124823 | 21.6% |
| RQW | Princess Alexandra Hospital NHSTrust                          | East of England                           | 14023 | 13172 | 12245 | 13114 | 10113 | 62667  | 22.4% |
| RCX | Queen Elizabeth Hospital Kings Lynn NHS Foundation Trust      | Yorkshire and<br>The Humber               | 9956  | 9404  | 8915  | 9806  | 7954  | 46035  | 21.6% |
| RPC | Queen Victoria Hospital NHS Foundation Trust                  | Yorkshire and<br>The Humber               | 6726  | 6806  | 6428  | 6905  | 5354  | 32219  | 20.9% |
| RL1 | Robert Jones and Agnes Hunt Orthopaedic NHS Trust             | South West                                | 13    | 15    | 14    | 17    | 10    | 68     | 19.2% |
| RHW | Royal Berkshire Hospital NHS Foundation Trust                 | South Central                             | 23542 | 22147 | 19591 | 20554 | 15735 | 101569 | 23.2% |
| RMC | Royal Bolton Hospital NHS Foundation Trust                    | East of England                           | 19020 | 17844 | 16126 | 17514 | 13573 | 84077  | 22.6% |
| RDZ | Royal Bournemouth and Christchurch Trust                      | East of England                           | 1184  | 1124  | 1104  | 1208  | 1042  | 5662   | 20.9% |
| RT3 | Royal Brompton and Harefield NHS Foundation Trust             | West Midlands                             | 947   | 861   | 732   | 730   | 554   | 3825   | 24.8% |
| REF | Royal Cornwall Hospitals NHS Trust                            | South West                                | 19261 | 18490 | 17834 | 20317 | 15741 | 91643  | 21.0% |
| RH8 | Royal Devon and Exeter NHS Foundation Trust                   | East of England                           | 15899 | 15614 | 14645 | 16187 | 13175 | 75519  | 21.1% |
| RAL | Royal Free Hampstead NHSTrust                                 | London                                    | 12566 | 10985 | 9392  | 8837  | 6444  | 48224  | 26.1% |
| RQ6 | Royal Liverpool Broadgreen Hospitals NHS Trust                | South East<br>Coast                       | 2739  | 2435  | 2229  | 2558  | 2415  | 12377  | 22.1% |
| RRJ | Royal Orthopaedic Hospital NHS Foundation Trust               | North East<br>South East                  | 66    | 63    | 58    | 60    | 46    | 293    | 22.5% |
| RA2 | Royal Surrey County NHS Foundation Trust                      | Coast<br>Yorkshire and<br>The Humber      | 14365 | 14654 | 13725 | 14410 | 11549 | 68703  | 20.9% |
| RD1 | Royal United Hospital Bath NHS Trust                          | The Humber                                | 19311 | 19120 | 18258 | 20436 | 16080 | 93205  | 20.7% |
| RL4 | Royal Wolverhampton Hospital NHS Trust                        | West Midlands                             | 17885 | 16607 | 14912 | 16480 | 13260 | 79145  | 22.6% |
| RM3 | Salford Royal NHS Foundation Trust                            | West Midlands                             | 8415  | 7550  | 6324  | 6878  | 5512  | 34678  | 24.3% |
| RNZ | Salisbury NHS Foundation Trust                                | North West                                | 10069 | 9941  | 9456  | 10268 | 7884  | 47618  | 21.1% |

|    |     |                                                               |                          |       |       |       |       |       |        |       |  |
|----|-----|---------------------------------------------------------------|--------------------------|-------|-------|-------|-------|-------|--------|-------|--|
| 1  |     |                                                               |                          |       |       |       |       |       |        |       |  |
| 2  |     |                                                               |                          |       |       |       |       |       |        |       |  |
| 3  |     | Sandwell and West Birmingham Hospitals NHS Trust              | South East Coast         | 22881 | 21606 | 19303 | 19471 | 15136 | 98396  | 23.3% |  |
| 4  | RXK |                                                               | Yorkshire and The Humber |       |       |       |       |       |        |       |  |
| 5  | RCU | Sheffield Children's NHS Foundation Trust                     |                          | 26393 | 25357 | 22926 | 23981 | 18891 | 117548 | 22.5% |  |
| 6  | RHQ | Sheffield Teaching Hospitals NHS Foundation Trust             | East of England          | 4173  | 4072  | 3698  | 3959  | 3504  | 19406  | 21.5% |  |
| 7  |     | Sherwood Forest Hospitals NHS Foundation Trust                |                          |       |       |       |       |       |        |       |  |
| 8  | RK5 |                                                               | North West               | 15327 | 14463 | 13411 | 14988 | 11922 | 70109  | 21.9% |  |
| 9  | RXW | Shrewsbury and Telford Hospital NHS Trust                     | North East               | 20758 | 20636 | 19583 | 22029 | 17634 | 100640 | 20.6% |  |
| 10 | RA9 | South Devon Health Care NHS Trust                             | South West               | 10266 | 10292 | 9849  | 11414 | 9087  | 50908  | 20.2% |  |
| 11 | RYQ | South London Healthcare NHS Trust                             | North West               | 9733  | 8978  | 7495  | 7661  | 5963  | 39830  | 24.4% |  |
| 12 | RTR | South Tees Hospitals NHS Foundation Trust                     | South Central            | 21107 | 20352 | 18832 | 20614 | 17076 | 97981  | 21.5% |  |
| 13 |     |                                                               | South East Coast         |       |       |       |       |       |        |       |  |
| 14 | RE9 | South Tyneside NHS Foundation Trust                           |                          | 5167  | 4960  | 4605  | 5200  | 4367  | 24299  | 21.3% |  |
| 15 | RJC | South Warwickshire NHS Foundation Trust                       | London                   | 9876  | 9961  | 9580  | 10252 | 7799  | 47468  | 20.8% |  |
| 16 |     | Southampton University Hospitals NHS Trust                    |                          |       |       |       |       |       |        |       |  |
| 17 | RHM |                                                               | East of England          | 26822 | 24691 | 22306 | 24038 | 19353 | 117210 | 22.9% |  |
| 18 |     | Southeast University Hospitals NHS Foundation Trust           |                          |       |       |       |       |       |        |       |  |
| 19 | RAJ |                                                               | East of England          | 14453 | 14083 | 13221 | 14890 | 11647 | 68295  | 21.2% |  |
| 20 |     | Southport and Ormskirk Hospital NHS Trust                     |                          |       |       |       |       |       |        |       |  |
| 21 | RVY |                                                               | London                   | 10260 | 10611 | 10266 | 11640 | 9066  | 51841  | 19.8% |  |
| 22 | RJ7 | St George's Healthcare NHS Trust                              | London                   | 31284 | 25426 | 20910 | 20320 | 15187 | 113127 | 27.7% |  |
| 23 |     | St Helens and Knowsley Hospitals NHS Trust                    |                          |       |       |       |       |       |        |       |  |
| 24 | RBN |                                                               | North West               | 14440 | 13666 | 12525 | 14139 | 11216 | 65986  | 21.9% |  |
| 25 |     |                                                               | South East Coast         |       |       |       |       |       |        |       |  |
| 26 | RWJ | Stockport NHS Foundation Trust                                |                          | 14134 | 14058 | 12724 | 14042 | 10899 | 65856  | 21.5% |  |
| 27 | RTP | Surrey and Sussex Healthcare NHS Trust                        | East Midlands            | 20733 | 19727 | 18279 | 19669 | 14772 | 93180  | 22.3% |  |
| 28 | RMP | Tameside Hospital NHS Foundation Trust                        | North West               | 11004 | 10191 | 9117  | 9808  | 7758  | 47877  | 23.0% |  |
| 29 |     | Taunton and Somerset NHS Foundation Trust                     |                          |       |       |       |       |       |        |       |  |
| 30 | RBA |                                                               | South West               | 13532 | 13249 | 12818 | 14902 | 12026 | 66528  | 20.3% |  |
| 31 |     | The Dudley Group Of Hospitals NHS Foundation Trust            |                          |       |       |       |       |       |        |       |  |
| 32 | RNA |                                                               | South West               | 17348 | 17061 | 15890 | 16886 | 13631 | 80817  | 21.5% |  |
| 33 | RAS | The Hillingdon Hospital NHS Trust                             | London                   | 14886 | 13457 | 11438 | 12017 | 9399  | 61198  | 24.3% |  |
| 34 | RJ2 | The Lewisham Healthcare NHS Trust                             | South Central            | 26515 | 23543 | 19021 | 19211 | 14991 | 103280 | 25.7% |  |
| 35 | RBT | The Mid Cheshire Hospitals NHS Trust                          | North West               | 12002 | 12187 | 11324 | 12439 | 10011 | 57962  | 20.7% |  |
| 36 | RFR | The Rotherham NHS Foundation Trust                            | North West               | 10858 | 10519 | 9827  | 10678 | 8464  | 50347  | 21.6% |  |
| 37 | RPY | The Royal Marsden NHS Foundation Trust                        | London                   | 82    | 81    | 70    | 67    | 49    | 348    | 23.4% |  |
| 38 |     | The Royal National Orthopaedic Hospital NHS Trust             |                          |       |       |       |       |       |        |       |  |
| 39 | RAN |                                                               | London                   | 72    | 61    | 56    | 58    | 43    | 289    | 24.7% |  |
| 40 | RET | The Walton Centre NHS Foundation Trust                        | North West               | 51    | 53    | 51    | 58    | 43    | 255    | 19.9% |  |
| 41 | RWD | United Lincolnshire Hospitals NHS Trust                       | North West               | 24615 | 23171 | 22206 | 25501 | 20431 | 115924 | 21.2% |  |
| 42 |     | University College London Hospitals NHS Foundation Trust      |                          |       |       |       |       |       |        |       |  |
| 43 | RRV |                                                               | North West               | 10842 | 9383  | 8334  | 7939  | 6283  | 42780  | 25.3% |  |
| 44 |     | University Hospital Birmingham NHS Foundation Trust           | Yorkshire and The Humber | 2588  | 2481  | 2271  | 2526  | 2242  | 12108  | 21.4% |  |
| 45 | RRK |                                                               |                          |       |       |       |       |       |        |       |  |
| 46 | RJE | University Hospital Of North Staffordshire Hospital NHS Trust | London                   | 24197 | 23673 | 21218 | 23229 | 18389 | 110705 | 21.9% |  |
| 47 |     | University Hospital Of South Manchester NHS Foundation Trust  |                          |       |       |       |       |       |        |       |  |
| 48 | RM2 |                                                               | West Midlands            | 16366 | 15706 | 13856 | 14309 | 10658 | 70896  | 23.1% |  |
| 49 |     | University Hospitals Coventry and Warwickshire NHS Trust      |                          |       |       |       |       |       |        |       |  |
| 50 | RKB |                                                               | London                   | 29209 | 26892 | 24075 | 25340 | 21005 | 126521 | 23.1% |  |
| 51 | RA7 | University Hospitals Of Bristol NHS Foundation Trust          | South West               | 34426 | 31174 | 27560 | 29230 | 22798 | 145188 | 23.7% |  |
| 52 | RWE | University Hospitals Of Leicester NHS Trust                   | North West               | 41652 | 40105 | 36915 | 39238 | 31954 | 189865 | 21.9% |  |
| 53 |     | University Hospitals Of Morecambe Bay NHS Foundation Trust    | South East Coast         |       |       |       |       |       |        |       |  |
| 54 | RTX |                                                               |                          | 13424 | 13509 | 13122 | 15302 | 12638 | 67995  | 19.7% |  |
| 55 | RBK | Walsall Hospitals NHS Trust                                   | South West               | 12567 | 12034 | 11231 | 11654 | 8966  | 56452  | 22.3% |  |
| 56 |     | Warrington and Halton Hospitals NHS Foundation Trust          |                          |       |       |       |       |       |        |       |  |
| 57 | RWW |                                                               | East of England          | 13354 | 13099 | 12099 | 13081 | 10137 | 61770  | 21.6% |  |
| 58 | RWG | West Hertfordshire Hospitals NHS Trust                        | East Midlands            | 22776 | 20977 | 19053 | 19683 | 14997 | 97486  | 23.4% |  |
| 59 |     |                                                               |                          |       |       |       |       |       |        |       |  |
| 60 |     |                                                               |                          |       |       |       |       |       |        |       |  |

1  
2  
3  
4  
5  
6  
7  
8  
9  
10  
11  
12  
13  
14  
15  
16  
17  
18  
19  
20  
21  
22  
23  
24  
25  
26  
27  
28  
29  
30  
31  
32  
33  
34  
35  
36  
37  
38  
39  
40  
41  
42  
43  
44  
45  
46  
47  
48  
49  
50  
51  
52  
53  
54  
55  
56  
57  
58  
59  
60

|  |     |                                                          |                 |       |       |       |       |       |        |       |  |
|--|-----|----------------------------------------------------------|-----------------|-------|-------|-------|-------|-------|--------|-------|--|
|  |     |                                                          | Yorkshire and   |       |       |       |       |       |        |       |  |
|  | RFW | West Middlesex University NHS Trust                      | The Humber      | 18219 | 15328 | 12170 | 12232 | 9481  | 67430  | 27.0% |  |
|  | RGR | West Suffolk Hospital NHS Trust                          | East of England | 12376 | 12108 | 11246 | 12210 | 9241  | 57180  | 21.6% |  |
|  | RYR | WesternSussexHospitals NHSTrust                          | West Midlands   | 19777 | 19254 | 18054 | 19539 | 15145 | 91769  | 21.6% |  |
|  | RA3 | Weston Area Health NHSTrust                              | South West      | 2682  | 2527  | 2462  | 2734  | 2132  | 12538  | 21.4% |  |
|  | RKE | Whittington Hospital NHSTrust                            | East Midlands   | 13329 | 11370 | 10013 | 9702  | 6897  | 51311  | 26.0% |  |
|  | RBL | Wirral University Teaching Hospital NHS Foundation Trust | West Midlands   | 15335 | 15076 | 14312 | 15661 | 12359 | 72743  | 21.1% |  |
|  | RWP | Worcestershire Acute Hospitals NHS Trust                 | East of England | 24382 | 24310 | 22996 | 25499 | 20116 | 117303 | 20.8% |  |
|  | RRF | Wrightington, Wigan and Leigh NHS Foundation Trust       | West Midlands   | 11380 | 11210 | 10239 | 10748 | 8714  | 52291  | 21.8% |  |
|  | RA4 | Yeovil District Hospital NHS Foundation Trust            | South West      | 7418  | 7357  | 7148  | 8704  | 6971  | 37598  | 19.7% |  |
|  | RCB | York Hospitals NHSTrust                                  | East of England | 21400 | 21300 | 19843 | 22308 | 18387 | 103238 | 20.7% |  |

**Appendix Table A5**  
**Admission rates by Trust for primary diagnosis epilepsy, any diagnosis epilepsy, all-cause admissions, per 100,000, 2014/15, England**

| Trust name                                                      | Number of admissions                  |                            |                        | Admission rate per 100,000 |                            |                        |           |
|-----------------------------------------------------------------|---------------------------------------|----------------------------|------------------------|----------------------------|----------------------------|------------------------|-----------|
|                                                                 | 2014/15 Hospital Catchment Population | Primary diagnosis epilepsy | Any epilepsy diagnosis | All-cause                  | Primary diagnosis epilepsy | Any epilepsy diagnosis | All-cause |
| Aintree UniversityHospitals NHSFoundation Trust                 | 10848                                 | 3                          | 8                      | 677                        | 27.7                       | 73.7                   | 6240.5    |
| Airedale NHS Foundation Trust                                   | 43450                                 | 31                         | 143                    | 3976                       | 71.3                       | 329.1                  | 9150.7    |
| Alder Hey Childrens NHS Foundation Trust                        | 134281                                | 61                         | 253                    | 10429                      | 45.4                       | 188.4                  | 7766.6    |
| Ashford and St Peter's Hospitals NHS Foundation Trust           | 67049                                 | 45                         | 72                     | 3423                       | 67.1                       | 107.4                  | 5105.2    |
| Barking, Havering and Redbridge University Hospitals NHS Trust  | 145366                                | 68                         | 136                    | 6777                       | 46.8                       | 93.6                   | 4662.0    |
| Barnsley Dist Gen Hosp NHS Foundation Trust                     | 52966                                 | 52                         | 104                    | 4690                       | 98.2                       | 196.4                  | 8854.7    |
| Barts Health NHS Trust                                          | 268558                                | 186                        | 401                    | 15818                      | 69.3                       | 149.3                  | 5890.0    |
| Basildon and Thurrock University Hospitals NHS Foundation Trust | 77489                                 | 56                         | 91                     | 3243                       | 72.3                       | 117.4                  | 4185.1    |
| Basingstoke and North Hampshire Hospitals NHS Foundation Trust  | 99421                                 | 97                         | 179                    | 6280                       | 97.6                       | 180.0                  | 6316.6    |
| Bedford Hospital NHS Trust                                      | 48718                                 | 35                         | 82                     | 2796                       | 71.8                       | 168.3                  | 5739.2    |
| Birmingham Children's Hospital NHS Foundation Trust             | 159686                                | 207                        | 519                    | 13716                      | 129.6                      | 325.0                  | 8589.4    |
| Birmingham Heartlands and Solihull Trust                        | 180098                                | 127                        | 253                    | 13882                      | 70.5                       | 140.5                  | 7708.0    |
| Birmingham Women's NHS Foundation Trust                         | 2897                                  | 0                          | 0                      | 135                        | 0.0                        | 0.0                    | 4659.7    |
| Blackpool Fylde and Wyre NHS Foundation Trust                   | 60397                                 | 63                         | 156                    | 6562                       | 104.3                      | 258.3                  | 10864.7   |
| Bradford Teaching Hospitals NHS Foundation Trust                | 111030                                | 82                         | 247                    | 7315                       | 73.9                       | 222.5                  | 6588.3    |
| Brighton and Sussex University Hospitals NHS Trust              | 105282                                | 39                         | 122                    | 6239                       | 37.0                       | 115.9                  | 5926.0    |
| Buckinghamshire Healthcare NHS Trust                            | 99550                                 | 53                         | 137                    | 7598                       | 53.2                       | 137.6                  | 7632.4    |
| Burton Hospitals NHS Foundation Trust                           | 61559                                 | 88                         | 157                    | 4629                       | 143.0                      | 255.0                  | 7519.6    |
| Calderdale and Huddersfield NHS Foundation Trust                | 95715                                 | 85                         | 178                    | 7533                       | 88.8                       | 186.0                  | 7870.2    |
| Cambridge University Hospitals NHS Foundation Trust             | 94647                                 | 58                         | 187                    | 4788                       | 61.3                       | 197.6                  | 5058.8    |
| Cambridgeshire Community Services NHS Trust                     | 38372                                 | 24                         | 71                     | 3526                       | 62.5                       | 185.0                  | 9188.9    |
| Central Manchester University Hospitals NHS Foundation Trust    | 134340                                | 115                        | 344                    | 13703                      | 85.6                       | 256.1                  | 10200.2   |
| Chelsea and Westminster Hospital NHS Foundation Trust           | 86439                                 | 30                         | 57                     | 4264                       | 34.7                       | 65.9                   | 4932.9    |
| Chesterfield Royal Hospital NHS Foundation Trust                | 56603                                 | 52                         | 106                    | 4469                       | 91.9                       | 187.3                  | 7895.4    |
| Christie Hospital NHS Trust                                     | 231                                   | 0                          | 0                      | 61                         | 0.0                        | 0.0                    | 26449.3   |
| City Hospitals Sunderland NHS Foundation Trust                  | 63650                                 | 49                         | 122                    | 5326                       | 77.0                       | 191.7                  | 8367.6    |
| Clatterbridge Centre For Oncology NHS Foundation Trust          | 45                                    | 0                          | 0                      | 7                          | 0.0                        | 0.0                    | 15534.8   |
| Colchester Hospital University NHS Foundation Trust             | 75048                                 | 71                         | 202                    | 6953                       | 94.6                       | 269.2                  | 9264.7    |
| Countess Of Chester Hospital NHS Foundation Trust               | 43204                                 | 25                         | 68                     | 3956                       | 57.9                       | 157.4                  | 9156.6    |
| County Durham and Darlington NHS Foundation Trust               | 108941                                | 100                        | 241                    | 11180                      | 91.8                       | 221.2                  | 10262.4   |
| Croydon Health Services NHS Trust                               | 77160                                 | 41                         | 57                     | 4146                       | 53.1                       | 73.9                   | 5373.3    |

|    |                                                        |        |     |     |       |       |       |         |
|----|--------------------------------------------------------|--------|-----|-----|-------|-------|-------|---------|
| 1  |                                                        |        |     |     |       |       |       |         |
| 2  |                                                        |        |     |     |       |       |       |         |
| 3  |                                                        |        |     |     |       |       |       |         |
| 4  | Dartford and Gravesham NHS Trust                       | 77768  | 54  | 116 | 6132  | 69.4  | 149.2 | 7885.0  |
| 5  | Derby Hospitals NHS Foundation Trust                   | 101709 | 55  | 117 | 4166  | 54.1  | 115.0 | 4096.0  |
| 6  | Doncaster and Bassetlaw Hospitals NHS Foundation Trust | 100244 | 73  | 143 | 9408  | 72.8  | 142.7 | 9385.1  |
| 7  |                                                        |        |     |     |       |       |       |         |
| 8  | Dorset County Hospital NHS Foundation Trust            | 38763  | 22  | 56  | 2440  | 56.8  | 144.5 | 6294.7  |
| 9  | East and North Hertfordshire NHS Trust                 | 105074 | 93  | 155 | 7140  | 88.5  | 147.5 | 6795.2  |
| 10 | East Cheshire NHS Trust                                | 35913  | 44  | 102 | 3176  | 122.5 | 284.0 | 8843.7  |
| 11 | East Kent Hospitals University NHS Foundation Trust    | 141973 | 106 | 236 | 10817 | 74.7  | 166.2 | 7619.1  |
| 12 |                                                        |        |     |     |       |       |       |         |
| 13 | East Lancashire Hospitals NHS Trust                    | 117300 | 87  | 326 | 13702 | 74.2  | 277.9 | 11681.2 |
| 14 | East Sussex Hospitals NHS Trust                        | 73412  | 83  | 134 | 5951  | 113.1 | 182.5 | 8106.3  |
| 15 | Epsom and St Helier University Hospitals NHS Trust     | 85745  | 54  | 153 | 4532  | 63.0  | 178.4 | 5285.4  |
| 16 |                                                        |        |     |     |       |       |       |         |
| 17 | Frimley Park Hospital NHS Trust                        | 190069 | 144 | 301 | 13022 | 75.8  | 158.4 | 6851.2  |
| 18 | Gateshead Health NHS Foundation Trust                  | 36789  | 16  | 30  | 3086  | 43.5  | 81.5  | 8388.4  |
| 19 |                                                        |        |     |     |       |       |       |         |
| 20 | George Eliot Hospital NHS Trust                        | 19381  | 1   | 4   | 1108  | 5.2   | 20.6  | 5717.0  |
| 21 | Gloucestershire Hospitals NHS Foundation Trust         | 119516 | 67  | 197 | 8192  | 56.1  | 164.8 | 6854.3  |
| 22 |                                                        |        |     |     |       |       |       |         |
| 23 | Great Ormond Street Hospital NHS Trust                 | 6236   | 16  | 32  | 612   | 256.6 | 513.1 | 9813.4  |
| 24 | Great Western Hospitals NHS Foundation Trust           | 82167  | 41  | 116 | 5800  | 49.9  | 141.2 | 7058.8  |
| 25 |                                                        |        |     |     |       |       |       |         |
| 26 | Guy's and St Thomas' NHS Foundation Trust              | 64902  | 71  | 142 | 4269  | 109.4 | 218.8 | 6577.6  |
| 27 | Harrogate and District NHS Foundation Trust            | 40560  | 12  | 39  | 3148  | 29.6  | 96.2  | 7761.3  |
| 28 | Hereford Hospitals NHS Trust                           | 39130  | 42  | 78  | 3204  | 107.3 | 199.3 | 8188.1  |
| 29 | Hinchingbrooke Healthcare NHS Trust                    | 6738   | 4   | 6   | 454   | 59.4  | 89.0  | 6738.0  |
| 30 | Homerton University Hospital NHS Foundation Trust      | 49332  | 42  | 68  | 2576  | 85.1  | 137.8 | 5221.7  |
| 31 |                                                        |        |     |     |       |       |       |         |
| 32 | Hull and East Yorkshire Hospitals NHS Trust            | 106281 | 112 | 230 | 6395  | 105.4 | 216.4 | 6017.1  |
| 33 | Imperial College Healthcare NHS Trust                  | 75876  | 54  | 111 | 3572  | 71.2  | 146.3 | 4707.7  |
| 34 |                                                        |        |     |     |       |       |       |         |
| 35 | Ipswich Hospital NHS Trust                             | 71379  | 43  | 126 | 4687  | 60.2  | 176.5 | 6566.3  |
| 36 | Isle of Wight NHS Trust                                | 28924  | 29  | 53  | 2323  | 100.3 | 183.2 | 8031.5  |
| 37 | James Paget University Hospitals NHS Foundation Trust  | 43863  | 29  | 51  | 2653  | 66.1  | 116.3 | 6048.3  |
| 38 | Kettering General Hospital NHS Foundation Trust        | 67436  | 72  | 132 | 5226  | 106.8 | 195.7 | 7749.6  |
| 39 |                                                        |        |     |     |       |       |       |         |
| 40 | King's College Hospital NHS Foundation Trust           | 150224 | 125 | 199 | 7881  | 83.2  | 132.5 | 5246.2  |
| 41 | Kingston Hospital NHS Trust                            | 70421  | 26  | 69  | 3755  | 36.9  | 98.0  | 5332.2  |
| 42 |                                                        |        |     |     |       |       |       |         |
| 43 | Lancashire Teaching Hospitals NHS Trust                | 87841  | 56  | 151 | 8954  | 63.8  | 171.9 | 10193.4 |
| 44 | Leeds Teaching Hospitals NHS Trust                     | 151367 | 91  | 251 | 9325  | 60.1  | 165.8 | 6160.5  |
| 45 | Liverpool Heart and Chest NHS Foundation Trust         | 64     | 0   | 0   | 19    | 0.0   | 0.0   | 29608.9 |
| 46 |                                                        |        |     |     |       |       |       |         |
| 47 | Liverpool Womens Hospital NHS Trust                    | 2475   | 0   | 0   | 160   | 0.0   | 0.0   | 6464.3  |
| 48 | London North West Healthcare NHS Trust                 | 166660 | 93  | 208 | 8497  | 55.8  | 124.8 | 5098.4  |
| 49 | Luton and Dunstable Hospital NHS Foundation Trust      | 96289  | 79  | 188 | 8583  | 82.0  | 195.2 | 8913.8  |
| 50 |                                                        |        |     |     |       |       |       |         |
| 51 | Maidstone and Tunbridge Wells NHS Trust                | 104481 | 64  | 98  | 4740  | 61.3  | 93.8  | 4536.7  |
| 52 | Medway NHS Trust                                       | 92044  | 115 | 245 | 8111  | 124.9 | 266.2 | 8812.1  |
| 53 |                                                        |        |     |     |       |       |       |         |
| 54 | Mid Essex Hospital Services NHS Trust                  | 100503 | 37  | 87  | 5353  | 36.8  | 86.6  | 5326.2  |
| 55 | Mid Staffordshire NHS Foundation Trust                 | 26235  | 12  | 26  | 2575  | 45.7  | 99.1  | 9815.2  |
| 56 | Mid Yorkshire Hospitals NHS Trust                      | 133869 | 94  | 208 | 9932  | 70.2  | 155.4 | 7419.2  |
| 57 | Milton Keynes Hospital NHS Foundation Trust            | 68737  | 99  | 226 | 6477  | 144.0 | 328.8 | 9422.8  |
| 58 | Moorfields Eye Hospital NHS Foundation Trust           | 843    | 0   | 0   | 44    | 0.0   | 0.0   | 5217.1  |
| 59 | Newcastle Upon Tyne Hospitals NHS Foundation Trust     | 124257 | 189 | 472 | 14198 | 152.1 | 379.9 | 11426.3 |
| 60 |                                                        |        |     |     |       |       |       |         |



1  
2  
3  
4  
5  
6  
7  
8  
9  
10  
11  
12  
13  
14  
15  
16  
17  
18  
19  
20  
21  
22  
23  
24  
25  
26  
27  
28  
29  
30  
31  
32  
33  
34  
35  
36  
37  
38  
39  
40  
41  
42  
43  
44  
45  
46  
47  
48  
49  
50  
51  
52  
53  
54  
55  
56  
57  
58  
59  
60

|                                                               |        |     |     |       |       |        |         |
|---------------------------------------------------------------|--------|-----|-----|-------|-------|--------|---------|
| Norfolk and Norwich University Hospitals NHS Foundation Trust | 118394 | 99  | 253 | 8667  | 83.6  | 213.7  | 7320.5  |
| North Bristol NHS Trust                                       | 19435  | 6   | 17  | 975   | 30.9  | 87.5   | 5016.8  |
| North Cumbria University Hospitals NHS Trust                  | 66748  | 61  | 116 | 5837  | 91.4  | 173.8  | 8744.8  |
| North Lincolnshire and Goole Hosps NHS Foundation Trust       | 87428  | 100 | 202 | 5471  | 114.4 | 231.0  | 6257.7  |
| North Middlesex University Hospital NHS Trust                 | 96137  | 75  | 140 | 7613  | 78.0  | 145.6  | 7918.9  |
| North Tees and Hartlepool NHS Foundation Trust                | 61068  | 49  | 133 | 5039  | 80.2  | 217.8  | 8251.5  |
| Northampton General Hospital NHS Trust                        | 80178  | 80  | 210 | 7464  | 99.8  | 261.9  | 9309.2  |
| Northern Devon Healthcare NHS Trust                           | 34821  | 14  | 55  | 2528  | 40.2  | 158.0  | 7260.0  |
| Northumbria Healthcare NHS Foundation Trust                   | 65421  | 54  | 108 | 5489  | 82.5  | 165.1  | 8390.3  |
| Nottingham University Hospitals NHS Trust                     | 172520 | 126 | 275 | 8811  | 73.0  | 159.4  | 5107.2  |
| Oxford Radcliffe Hospital NHS Trust                           | 153875 | 90  | 240 | 10252 | 58.5  | 156.0  | 6662.5  |
| Papworth Hospital NHS Foundation Trust                        | 69     | 0   | 1   | 15    | 0.0   | 1444.5 | 21666.9 |
| Pennine Acute Hospitals NHS Trust                             | 172774 | 139 | 339 | 17532 | 80.5  | 196.2  | 10147.4 |
| Peterborough and Stamford Hospitals NHS Foundation Trust      | 79335  | 64  | 179 | 6925  | 80.7  | 225.6  | 8728.8  |
| Plymouth Hospitals NHS Trust                                  | 93846  | 78  | 164 | 7139  | 83.1  | 174.8  | 7607.1  |
| Poole Hospital NHS Foundation Trust                           | 97422  | 67  | 250 | 7897  | 68.8  | 256.6  | 8106.0  |
| Portsmouth Hospitals NHS Trust                                | 118416 | 99  | 198 | 7045  | 83.6  | 167.2  | 5949.4  |
| Princess Alexandra Hospital NHS Trust                         | 61910  | 28  | 53  | 2748  | 45.2  | 85.6   | 4438.7  |
| Queen Elizabeth Hospital Kings Lynn NHS Foundation Trust      | 44609  | 43  | 112 | 4126  | 96.4  | 251.1  | 9249.2  |
| Queen Victoria Hospital NHS Foundation Trust                  | 28764  | 0   | 7   | 1223  | 0.0   | 24.3   | 4251.8  |
| Robert Jones and Agnes Hunt Orthopaedic NHS Trust             | 93     | 0   | 0   | 4     | 0.0   | 0.0    | 4316.4  |
| Royal Berkshire Hospital NHS Foundation Trust                 | 100771 | 92  | 166 | 5495  | 91.3  | 164.7  | 5453.0  |
| Royal Bolton Hospital NHS Foundation Trust                    | 84314  | 59  | 151 | 7436  | 70.0  | 179.1  | 8819.4  |
| Royal Bournemouth and Christchurch Trust                      | 6007   | 3   | 6   | 423   | 49.9  | 99.9   | 7041.3  |
| Royal Brompton and Harefield NHS Foundation Trust             | 3899   | 0   | 6   | 317   | 0.0   | 153.9  | 8131.0  |
| Royal Cornwall Hospitals NHS Trust                            | 91698  | 79  | 168 | 6931  | 86.2  | 183.2  | 7558.5  |
| Royal Devon and Exeter NHS Foundation Trust                   | 78322  | 68  | 149 | 6081  | 86.8  | 190.2  | 7764.1  |
| Royal Free Hampstead NHS Trust                                | 155113 | 97  | 211 | 8688  | 62.5  | 136.0  | 5601.1  |
| Royal Liverpool Broadgreen Hospitals NHS Trust                | 12110  | 3   | 9   | 711   | 24.8  | 74.3   | 5871.3  |
| Royal Orthopaedic Hospital NHS Foundation Trust               | 405    | 0   | 1   | 25    | 0.0   | 246.8  | 6170.2  |
| Royal Surrey County NHS Foundation Trust                      | 67670  | 37  | 72  | 3653  | 54.7  | 106.4  | 5398.3  |
| Royal United Hospital Bath NHS Trust                          | 92029  | 63  | 178 | 6010  | 68.5  | 193.4  | 6530.5  |
| Royal Wolverhampton Hospital NHS Trust                        | 79276  | 125 | 242 | 8040  | 157.7 | 305.3  | 10141.8 |
| Salford Royal NHS Foundation Trust                            | 34985  | 32  | 50  | 2939  | 91.5  | 142.9  | 8400.8  |
| Salisbury NHS Foundation Trust                                | 47659  | 17  | 52  | 2341  | 35.7  | 109.1  | 4912.0  |
| Sandwell and West Birmingham Hospitals NHS Trust              | 100183 | 72  | 161 | 8815  | 71.9  | 160.7  | 8798.9  |
| Sheffield Children's NHS Foundation Trust                     | 102197 | 73  | 208 | 7095  | 71.4  | 203.5  | 6942.5  |
| Sheffield Teaching Hospitals NHS Foundation Trust             | 27899  | 4   | 8   | 1326  | 14.3  | 28.7   | 4752.9  |
| Sherwood Forest Hospitals NHS Foundation Trust                | 70777  | 26  | 98  | 4878  | 36.7  | 138.5  | 6892.1  |
| Shrewsbury and Telford Hospital NHS Trust                     | 102368 | 68  | 166 | 7760  | 66.4  | 162.2  | 7580.5  |
| South Devon Health Care NHS Trust                             | 50569  | 38  | 92  | 2755  | 75.1  | 181.9  | 5448.0  |
| South Tees Hospitals NHS Foundation Trust                     | 98197  | 110 | 292 | 9914  | 112.0 | 297.4  | 10096.1 |

|    |                                                |        |     |     |       |       |        |          |
|----|------------------------------------------------|--------|-----|-----|-------|-------|--------|----------|
| 1  |                                                |        |     |     |       |       |        |          |
| 2  |                                                |        |     |     |       |       |        |          |
| 3  |                                                |        |     |     |       |       |        |          |
| 4  | South Tyneside NHS Foundation Trust            | 23625  | 12  | 21  | 1595  | 50.8  | 88.9   | 6751.4   |
| 5  | South Warwickshire NHS Foundation Trust        | 46629  | 39  | 81  | 3481  | 83.6  | 173.7  | 7465.3   |
| 6  | Southampton University Hospitals NHS Trust     | 120636 | 116 | 230 | 10139 | 96.2  | 190.7  | 8404.6   |
| 7  | Southend University Hospitals NHS              |        |     |     |       |       |        |          |
| 8  | Foundation Trust                               | 66039  | 25  | 77  | 2835  | 37.9  | 116.6  | 4292.9   |
| 9  | Southport and Ormskirk Hospital NHS Trust      | 53484  | 37  | 71  | 4329  | 69.2  | 132.7  | 8094.0   |
| 10 | St George's Healthcare NHS Trust               | 118041 | 74  | 150 | 7046  | 62.7  | 127.1  | 5969.1   |
| 11 | St Helens and Knowsley Hospitals NHS Trust     | 67966  | 28  | 86  | 6654  | 41.2  | 126.5  | 9790.2   |
| 12 | Stockport NHS Foundation Trust                 | 63583  | 59  | 111 | 5540  | 92.8  | 174.6  | 8713.0   |
| 13 | Surrey and Sussex Healthcare NHS Trust         | 83612  | 36  | 91  | 3986  | 43.1  | 108.8  | 4767.3   |
| 14 | Tameside Hospital NHS Foundation Trust         | 48707  | 44  | 97  | 4406  | 90.3  | 199.1  | 9045.9   |
| 15 | Taunton and Somerset NHS Foundation Trust      | 66116  | 54  | 134 | 4714  | 81.7  | 202.7  | 7129.9   |
| 16 | The Dudley Group Of Hospitals NHS              |        |     |     |       |       |        |          |
| 17 | Foundation Trust                               | 81498  | 46  | 117 | 6976  | 56.4  | 143.6  | 8559.8   |
| 18 | The Hillingdon Hospital NHS Trust              | 65195  | 50  | 106 | 4471  | 76.7  | 162.6  | 6857.8   |
| 19 | The Lewisham Healthcare NHS Trust              | 151669 | 100 | 207 | 11784 | 65.9  | 136.5  | 7769.5   |
| 20 | The Mid Cheshire Hospitals NHS Trust           | 56699  | 56  | 147 | 4507  | 98.8  | 259.3  | 7949.0   |
| 21 | The Rotherham NHS Foundation Trust             | 52577  | 29  | 81  | 3858  | 55.2  | 154.1  | 7337.8   |
| 22 | The Royal Marsden NHS Foundation Trust         | 104    | 0   | 1   | 108   | 0.0   | 963.5  | 104056.3 |
| 23 | The Royal National Orthopaedic Hospital NHS    |        |     |     |       |       |        |          |
| 24 | Trust                                          | 409    | 0   | 2   | 47    | 0.0   | 489.4  | 11500.7  |
| 25 | The Walton Centre NHS Foundation Trust         | 281    | 1   | 3   | 34    | 355.7 | 1067.1 | 12094.0  |
| 26 | United Lincolnshire Hospitals NHS Trust        | 112401 | 60  | 205 | 7860  | 53.4  | 182.4  | 6992.8   |
| 27 | University College London Hospitals NHS        |        |     |     |       |       |        |          |
| 28 | Foundation Trust                               | 42106  | 12  | 23  | 1698  | 28.5  | 54.6   | 4032.6   |
| 29 | University Hospital Birmingham NHS             |        |     |     |       |       |        |          |
| 30 | Foundation Trust                               | 10979  | 11  | 29  | 764   | 100.2 | 264.2  | 6959.0   |
| 31 | University Hospital Of North Staffordshire     |        |     |     |       |       |        |          |
| 32 | Hospital NHS Trust                             | 127581 | 119 | 322 | 13212 | 93.3  | 252.4  | 10355.7  |
| 33 | University Hospital Of South Manchester NHS    |        |     |     |       |       |        |          |
| 34 | Foundation Trust                               | 71403  | 37  | 90  | 6131  | 51.8  | 126.0  | 8586.4   |
| 35 | University Hospitals Coventry and              |        |     |     |       |       |        |          |
| 36 | Warwickshire NHS Trust                         | 126537 | 119 | 231 | 8305  | 94.0  | 182.6  | 6563.3   |
| 37 | University Hospitals Of Bristol NHS Foundation |        |     |     |       |       |        |          |
| 38 | Trust                                          | 172827 | 116 | 256 | 9743  | 67.1  | 148.1  | 5637.4   |
| 39 | University Hospitals Of Leicester NHS Trust    | 192382 | 120 | 277 | 9512  | 62.4  | 144.0  | 4944.3   |
| 40 | University Hospitals Of Morecambe Bay NHS      |        |     |     |       |       |        |          |
| 41 | Foundation Trust                               | 68522  | 64  | 169 | 6775  | 93.4  | 246.6  | 9887.3   |
| 42 | Walsall Hospitals NHS Trust                    | 55821  | 44  | 85  | 3039  | 78.8  | 152.3  | 5444.2   |
| 43 | Warrington and Halton Hospitals NHS            |        |     |     |       |       |        |          |
| 44 | Foundation Trust                               | 61421  | 50  | 81  | 5048  | 81.4  | 131.9  | 8218.6   |
| 45 | West Hertfordshire Hospitals NHS Trust         | 95384  | 51  | 109 | 5362  | 53.5  | 114.3  | 5621.5   |
| 46 | West Middlesex University NHS Trust            | 63584  | 33  | 106 | 3098  | 51.9  | 166.7  | 4872.3   |
| 47 | West Suffolk Hospital NHS Trust                | 56939  | 47  | 99  | 4007  | 82.5  | 173.9  | 7037.4   |
| 48 | Western Sussex Hospitals NHS Trust             | 94045  | 67  | 166 | 7452  | 71.2  | 176.5  | 7923.9   |
| 49 | Weston Area Health NHS Trust                   | 13040  | 9   | 16  | 845   | 69.0  | 122.7  | 6479.8   |
| 50 | Whittington Hospital NHS Trust                 | 50647  | 28  | 59  | 3382  | 55.3  | 116.5  | 6677.6   |
| 51 | Wirral University Teaching Hospital NHS        |        |     |     |       |       |        |          |
| 52 | Foundation Trust                               | 72140  | 49  | 173 | 5321  | 67.9  | 239.8  | 7375.9   |
| 53 | Worcestershire Acute Hospitals NHS Trust       | 115581 | 70  | 167 | 7114  | 60.6  | 144.5  | 6155.0   |
| 54 | Wrightington, Wigan and Leigh NHS              |        |     |     |       |       |        |          |
| 55 | Foundation Trust                               | 51486  | 49  | 108 | 3104  | 95.2  | 209.8  | 6028.8   |
| 56 | Yeovil District Hospital NHS Foundation Trust  | 35923  | 19  | 49  | 2182  | 52.9  | 136.4  | 6074.1   |
| 57 | York Hospitals NHS Trust                       | 104298 | 107 | 187 | 7723  | 102.6 | 179.3  | 7404.7   |
| 58 |                                                |        |     |     |       |       |        |          |
| 59 |                                                |        |     |     |       |       |        |          |
| 60 |                                                |        |     |     |       |       |        |          |

**1STROBE 2007 (v4) Statement—Checklist of items that should be included in reports of *cross-sectional studies***

| Section/Topic                | Item # | Recommendation                                                                                                                                                                       | Reported on page # |
|------------------------------|--------|--------------------------------------------------------------------------------------------------------------------------------------------------------------------------------------|--------------------|
| <b>Title and abstract</b>    | 1      | (a) Indicate the study's design with a commonly used term in the title or the abstract                                                                                               | 1                  |
|                              |        | (b) Provide in the abstract an informative and balanced summary of what was done and what was found                                                                                  | 1-2                |
| <b>Introduction</b>          |        |                                                                                                                                                                                      |                    |
| Background/rationale         | 2      | Explain the scientific background and rationale for the investigation being reported                                                                                                 | 4                  |
| Objectives                   | 3      | State specific objectives, including any prespecified hypotheses                                                                                                                     | 5                  |
| <b>Methods</b>               |        |                                                                                                                                                                                      |                    |
| Study design                 | 4      | Present key elements of study design early in the paper                                                                                                                              | 5-7                |
| Setting                      | 5      | Describe the setting, locations, and relevant dates, including periods of recruitment, exposure, follow-up, and data collection                                                      | 5                  |
| Participants                 | 6      | (a) Give the eligibility criteria, and the sources and methods of selection of participants                                                                                          | 5-6                |
| Variables                    | 7      | Clearly define all outcomes, exposures, predictors, potential confounders, and effect modifiers. Give diagnostic criteria, if applicable                                             | 5-7                |
| Data sources/<br>measurement | 8*     | For each variable of interest, give sources of data and details of methods of assessment (measurement). Describe comparability of assessment methods if there is more than one group | 5                  |
| Bias                         | 9      | Describe any efforts to address potential sources of bias                                                                                                                            | 7-8                |
| Study size                   | 10     | Explain how the study size was arrived at                                                                                                                                            | 5                  |
| Quantitative variables       | 11     | Explain how quantitative variables were handled in the analyses. If applicable, describe which groupings were chosen and why                                                         | N/A                |
| Statistical methods          | 12     | (a) Describe all statistical methods, including those used to control for confounding                                                                                                | 6-8                |
|                              |        | (b) Describe any methods used to examine subgroups and interactions                                                                                                                  | N/A                |
|                              |        | (c) Explain how missing data were addressed                                                                                                                                          | 7-8                |
|                              |        | (d) If applicable, describe analytical methods taking account of sampling strategy                                                                                                   | N/A                |
|                              |        | (e) Describe any sensitivity analyses                                                                                                                                                | N/A                |
| <b>Results</b>               |        |                                                                                                                                                                                      |                    |

|                          |     |                                                                                                                                                                                                              |                         |
|--------------------------|-----|--------------------------------------------------------------------------------------------------------------------------------------------------------------------------------------------------------------|-------------------------|
| Participants             | 13* | (a) Report numbers of individuals at each stage of study—eg numbers potentially eligible, examined for eligibility, confirmed eligible, included in the study, completing follow-up, and analysed            | 9                       |
|                          |     | (b) Give reasons for non-participation at each stage                                                                                                                                                         | N/A                     |
|                          |     | (c) Consider use of a flow diagram                                                                                                                                                                           | N/A                     |
| Descriptive data         | 14* | (a) Give characteristics of study participants (eg demographic, clinical, social) and information on exposures and potential confounders                                                                     | N/A                     |
|                          |     | (b) Indicate number of participants with missing data for each variable of interest                                                                                                                          | 8 (+ Appendix Table A5) |
| Outcome data             | 15* | Report numbers of outcome events or summary measures                                                                                                                                                         | 9-10                    |
| Main results             | 16  | (a) Give unadjusted estimates and, if applicable, confounder-adjusted estimates and their precision (eg, 95% confidence interval). Make clear which confounders were adjusted for and why they were included | 9-11                    |
|                          |     | (b) Report category boundaries when continuous variables were categorized                                                                                                                                    | N/A                     |
|                          |     | (c) If relevant, consider translating estimates of relative risk into absolute risk for a meaningful time period                                                                                             | N/A                     |
| Other analyses           | 17  | Report other analyses done—eg analyses of subgroups and interactions, and sensitivity analyses                                                                                                               | N/A                     |
| <b>Discussion</b>        |     |                                                                                                                                                                                                              |                         |
| Key results              | 18  | Summarise key results with reference to study objectives                                                                                                                                                     | 11                      |
| Limitations              | 19  | Discuss limitations of the study, taking into account sources of potential bias or imprecision. Discuss both direction and magnitude of any potential bias                                                   | 11-12                   |
| Interpretation           | 20  | Give a cautious overall interpretation of results considering objectives, limitations, multiplicity of analyses, results from similar studies, and other relevant evidence                                   | 12-13                   |
| Generalisability         | 21  | Discuss the generalisability (external validity) of the study results                                                                                                                                        | 13                      |
| <b>Other information</b> |     |                                                                                                                                                                                                              |                         |
| Funding                  | 22  | Give the source of funding and the role of the funders for the present study and, if applicable, for the original study on which the present article is based                                                | 15                      |

\*Give information separately for cases and controls in case-control studies and, if applicable, for exposed and unexposed groups in cohort and cross-sectional studies.

**Note:** An Explanation and Elaboration article discusses each checklist item and gives methodological background and published examples of transparent reporting. The STROBE checklist is best used in conjunction with this article (freely available on the Web sites of PLoS Medicine at <http://www.plosmedicine.org/>, Annals of Internal Medicine at <http://www.annals.org/>, and Epidemiology at <http://www.epidem.com/>). Information on the STROBE Initiative is available at [www.strobe-statement.org](http://www.strobe-statement.org).
