# Supplementary material for: Use of age-specific hospital catchment populations to investigate geographical variation in inpatient admissions for children and young people in England: retrospective, cross-sectional study
Source: PubMed Central journal article supplement — BMJ Open. 2018 Jul 10;8(7):e022339. doi: 10.1136/bmjopen-2018-022339 (PMC6082474; doi:10.1136/bmjopen-2018-022339), 2018-07-10
Supplement: bmjopen-2018-022339supp001.pdf [file bmjopen-2018-022339supp001.pdf]

**Appendix Table A1**  
**Proportion of all-cause paediatric care episodes with missing Lower Super Output Area (LSOA), English Hospital Episode Statistics, 2014/15**

|                                                                  |     | Invalid | Valid | Total |       |
|------------------------------------------------------------------|-----|---------|-------|-------|-------|
| Aintree UniversityHospitals NHS Foundation Trust                 | REM | 7       | 708   | 715   | 1.0%  |
| Airedale NHS Foundation Trust                                    | RCF | 8       | 4128  | 4136  | 0.2%  |
| Alder Hey Childrens NHS Foundation Trust                         | RBS | 548     | 10429 | 10977 | 5.0%  |
| Ashford and St Peter's Hospitals NHS Foundation Trust            | RTK | 17      | 3425  | 3442  | 0.5%  |
| Barking, Havering and Redbridge University Hospitals NHS Trust   | RF4 | 63      | 7061  | 7124  | 0.9%  |
| Barnsley Dist Gen Hosp NHS Foundation Trust                      | RFF | 8       | 4690  | 4698  | 0.2%  |
| Barts Health NHS Trust                                           | R1H | 198     | 16161 | 16359 | 1.2%  |
| Basilidon and Thurrock University Hospitals NHS Foundation Trust | RDD | 22      | 3265  | 3287  | 0.7%  |
| Basingstoke and North Hampshire Hospitals NHS Foundation Trust   | RN5 | 50      | 6349  | 6399  | 0.8%  |
| Bedford Hospital NHS Trust                                       | RC1 | 16      | 2796  | 2812  | 0.6%  |
| Birmingham Children's Hospital NHS Foundation Trust              | RQ3 | 56      | 13864 | 13920 | 0.4%  |
| Birmingham Heartlands and Solihull Trust                         | RR1 | 178     | 14008 | 14186 | 1.3%  |
| Blackpool Fylde and Wyre NHS Foundation Trust                    | RXL | 63      | 6562  | 6625  | 1.0%  |
| Bradford Teaching Hospitals NHS Foundation Trust                 | RAE | 11      | 7878  | 7889  | 0.1%  |
| Brighton and Sussex University Hospitals NHS Trust               | RXH | 63      | 6378  | 6441  | 1.0%  |
| Buckinghamshire Healthcare NHS Trust                             | RXQ | 22      | 7699  | 7721  | 0.3%  |
| Burton Hospitals NHS Foundation Trust                            | RJF | 8       | 4629  | 4637  | 0.2%  |
| Calderdale and Huddersfield NHS Foundation Trust                 | RWY | 11      | 7533  | 7544  | 0.1%  |
| Cambridge University Hospitals NHS Foundation Trust              | RGT | 69      | 5012  | 5081  | 1.4%  |
| Cambridgeshire Community Services NHS Trust                      | RYV | 9       | 3526  | 3535  | 0.3%  |
| Central Manchester University Hospitals NHS Foundation Trust     | RW3 | 192     | 15181 | 15373 | 1.2%  |
| Chelsea and Westminster Hospital NHS Foundation Trust            | RQM | 112     | 4264  | 4376  | 2.6%  |
| Chesterfield Royal Hospital NHS Foundation Trust                 | RFS | 27      | 4487  | 4514  | 0.6%  |
| City Hospitals Sunderland NHS Foundation Trust                   | RLN | 55      | 5637  | 5692  | 1.0%  |
| Colchester Hospital University NHS Foundation Trust              | RDE | 22      | 7074  | 7096  | 0.3%  |
| Countess Of Chester Hospital NHS Foundation Trust                | RJR | 1049    | 3956  | 5005  | ####  |
| County Durham and Darlington NHS Foundation Trust                | RXP | 37      | 11180 | 11217 | 0.3%  |
| Croydon Health Services NHS Trust                                | RJ6 | 481     | 4194  | 4675  | ####  |
| Dartford and Gravesham NHS Trust                                 | RN7 | 25      | 6426  | 6451  | 0.4%  |
| Derby Hospitals NHS Foundation Trust                             | RTG | 181     | 4166  | 4347  | 4.2%  |
| Doncaster and Bassetlaw Hospitals NHS Foundation Trust           | RP5 | 10      | 9623  | 9633  | 0.1%  |
| Dorset County Hospital NHS Foundation Trust                      | RBD | 15      | 2963  | 2978  | 0.5%  |
| East and North Hertfordshire NHS Trust                           | RWH | 25      | 7372  | 7397  | 0.3%  |
| East Cheshire NHS Trust                                          | RJN | -       | -     | 3179  | <0.1% |
| East Kent Hospitals University NHS Foundation Trust              | RVV | 63      | 10829 | 10892 | 0.6%  |
| East Lancashire Hospitals NHS Trust                              | RXR | 15      | 13702 | 13717 | 0.1%  |
| East Sussex Hospitals NHS Trust                                  | RXC | 33      | 5951  | 5984  | 0.6%  |

|                                                               |     |     |       |       |       |
|---------------------------------------------------------------|-----|-----|-------|-------|-------|
| Epsom and St Helier University Hospitals NHS Trust            | RVR | 59  | 4658  | 4717  | 1.3%  |
| Frimley Park Hospital NHS Trust                               | RDU | 34  | 13022 | 13056 | 0.3%  |
| Gateshead Health NHS Foundation Trust                         | RR7 | 17  | 3086  | 3103  | 0.5%  |
| George Eliot Hospital NHS Trust                               | RLT | -   | -     | 1126  | <0.1% |
| Gloucestershire Hospitals NHS Foundation Trust                | RTE | 49  | 8193  | 8242  | 0.6%  |
| Great Ormond Street Hospital NHS Trust                        | RP4 | 216 | 612   | 828   | ####  |
| Great Western Hospitals NHS Foundation Trust                  | RN3 | 29  | 5800  | 5829  | 0.5%  |
| Guy's and St Thomas' NHS Foundation Trust                     | RJ1 | 122 | 4269  | 4391  | 2.8%  |
| Harrogate and District NHS Foundation Trust                   | RCD | 10  | 3300  | 3310  | 0.3%  |
| Hereford Hospitals NHS Trust                                  | RLQ | 347 | 3453  | 3800  | 9.1%  |
| Hinchingbrooke Healthcare NHS Trust                           | RQQ | -   | -     | 455   | <0.1% |
| Homerton University Hospital NHS Foundation Trust             | RQX | 15  | 2576  | 2591  | 0.6%  |
| Hull and East Yorkshire Hospitals NHS Trust                   | RWA | 19  | 7910  | 7929  | 0.2%  |
| Imperial College Healthcare NHS Trust                         | RYJ | 207 | 3837  | 4044  | 5.1%  |
| Ipswich Hospital NHS Trust                                    | RGQ | 30  | 5399  | 5429  | 0.6%  |
| Isle of Wight NHS Trust                                       | R1F | 10  | 2323  | 2333  | 0.4%  |
| James Paget University Hospitals NHS Foundation Trust         | RGP | 10  | 2940  | 2950  | 0.3%  |
| Kettering General Hospital NHS Foundation Trust               | RNQ | -   | -     | 5229  | <0.1% |
| King's College Hospital NHS Foundation Trust                  | RJZ | 96  | 7895  | 7991  | 1.2%  |
| Kingston Hospital NHS Trust                                   | RAX | 49  | 3772  | 3821  | 1.3%  |
| Lancashire Teaching Hospitals NHS Trust                       | RXN | 58  | 8954  | 9012  | 0.6%  |
| Leeds Teaching Hospitals NHS Trust                            | RR8 | 36  | 9409  | 9445  | 0.4%  |
| London North West Healthcare NHS Trust                        | R1K | 69  | 8792  | 8861  | 0.8%  |
| Luton and Dunstable Hospital NHS Foundation Trust             | RC9 | 41  | 9123  | 9164  | 0.4%  |
| Maidstone and Tunbridge Wells NHS Trust                       | RWF | 16  | 4750  | 4766  | 0.3%  |
| Medway NHS Trust                                              | RPA | 34  | 8205  | 8239  | 0.4%  |
| Mid Essex Hospital Services NHS Trust                         | RQ8 | 33  | 5353  | 5386  | 0.6%  |
| Mid Staffordshire NHS Foundation Trust                        | RJD | 18  | 2616  | 2634  | 0.7%  |
| Mid Yorkshire Hospitals NHS Trust                             | RXF | 32  | 10681 | 10713 | 0.3%  |
| Milton Keynes Hospital NHS Foundation Trust                   | RD8 | 38  | 6523  | 6561  | 0.6%  |
| Newcastle Upon Tyne Hospitals NHS Foundation Trust            | RTD | 141 | 14332 | 14473 | 1.0%  |
| Norfolk and Norwich University Hospitals NHS Foundation Trust | RM1 | 25  | 8824  | 8849  | 0.3%  |
| North Bristol NHS Trust                                       | RVJ | 19  | 996   | 1015  | 1.9%  |
| North Cumbria University Hospitals NHS Trust                  | RNL | 159 | 5837  | 5996  | 2.7%  |
| North Lincolnshire and Goole Hosps NHS Foundation Trust       | RJL | 7   | 5531  | 5538  | 0.1%  |
| North Middlesex University Hospital NHS Trust                 | RAP | 58  | 7613  | 7671  | 0.8%  |
| North Tees and Hartlepool NHS Foundation Trust                | RVW | -   | -     | 5043  | <0.1% |
| Northampton General Hospital NHS Trust                        | RNS | 16  | 7594  | 7610  | 0.2%  |
| Northern Devon Healthcare NHS Trust                           | RBZ | 13  | 2528  | 2541  | 0.5%  |
| Northumbria Healthcare NHS Foundation Trust                   | RTF | 15  | 6137  | 6152  | 0.2%  |
| Nottingham University Hospitals NHS Trust                     | RX1 | 26  | 9005  | 9031  | 0.3%  |
| Oxford Radcliffe Hospital NHS Trust                           | RTH | 110 | 10408 | 10518 | 1.0%  |
| Pennine Acute Hospitals NHS Trust                             | RW6 | 41  | 17532 | 17573 | 0.2%  |
| Peterborough and Stamford Hospitals NHS Foundation Trust      | RGN | 17  | 6931  | 6948  | 0.2%  |
| Plymouth Hospitals NHS Trust                                  | RK9 | 16  | 7560  | 7576  | 0.2%  |
| Poole Hospital NHS Foundation Trust                           | RD3 | 67  | 8293  | 8360  | 0.8%  |

|                                                               |     |     |       |       |       |
|---------------------------------------------------------------|-----|-----|-------|-------|-------|
| Portsmouth Hospitals NHS Trust                                | RHU | 21  | 7075  | 7096  | 0.3%  |
| Princess Alexandra Hospital NHSTrust                          | RQW | 32  | 2770  | 2802  | 1.1%  |
| Queen Elizabeth Hospital Kings Lynn NHS Foundation Trust      | RCX | 9   | 4126  | 4135  | 0.2%  |
| Royal Berkshire Hospital NHS Foundation Trust                 | RHW | 73  | 5495  | 5568  | 1.3%  |
| Royal Bolton Hospital NHS Foundation Trust                    | RMC | 22  | 8272  | 8294  | 0.3%  |
| Royal Bournemouth and Christchurch Trust                      | RDZ | 34  | 479   | 513   | 6.6%  |
| Royal Cornwall Hospitals NHS Trust                            | REF | 55  | 6932  | 6987  | 0.8%  |
| Royal Devon and Exeter NHS Foundation Trust                   | RH8 | 39  | 6081  | 6120  | 0.6%  |
| Royal Free Hampstead NHSTrust                                 | RAL | 116 | 8720  | 8836  | 1.3%  |
| Royal Liverpool Broadgreen Hospitals NHS Trust                | RQ6 | 19  | 857   | 876   | 2.2%  |
| Royal Surrey County NHS Foundation Trust                      | RA2 | 70  | 3659  | 3729  | 1.9%  |
| Royal United Hospital Bath NHS Trust                          | RD1 | 46  | 6146  | 6192  | 0.7%  |
| Royal Wolverhampton Hospital NHS Trust                        | RL4 | 36  | 8040  | 8076  | 0.4%  |
| Salford Royal NHS Foundation Trust                            | RM3 | 19  | 2939  | 2958  | 0.6%  |
| Salisbury NHS Foundation Trust                                | RNZ | 21  | 2359  | 2380  | 0.9%  |
| Sandwell and West Birmingham Hospitals NHS Trust              | RXK | 75  | 8955  | 9030  | 0.8%  |
| Sheffield Children's NHS Foundation Trust                     | RCU | 16  | 7095  | 7111  | 0.2%  |
| Sheffield Teaching Hospitals NHS Foundation Trust             | RHQ | -   | -     | 1438  | <0.1% |
| Sherwood Forest Hospitals NHS Foundation Trust                | RK5 | 39  | 5065  | 5104  | 0.8%  |
| Shrewsbury and Telford Hospital NHS Trust                     | RXW | 731 | 7873  | 8604  | 8.5%  |
| South Devon Health Care NHS Trust                             | RA9 | 36  | 3242  | 3278  | 1.1%  |
| South Tees Hospitals NHS Foundation Trust                     | RTR | 36  | 10272 | 10308 | 0.3%  |
| South Tyneside NHS Foundation Trust                           | RE9 | -   | -     | 1628  | <0.1% |
| South Warwickshire NHS Foundation Trust                       | RJC | 330 | 3488  | 3818  | 8.6%  |
| Southampton University Hospitals NHS Trust                    | RHM | 97  | 10154 | 10251 | 0.9%  |
| Southend University Hospitals NHS Foundation Trust            | RAJ | 13  | 2857  | 2870  | 0.5%  |
| Southport and Ormskirk Hospital NHS Trust                     | RVY | 33  | 4397  | 4430  | 0.7%  |
| St George's Healthcare NHS Trust                              | RJ7 | 79  | 7366  | 7445  | 1.1%  |
| St Helens and Knowsley Hospitals NHS Trust                    | RBN | 53  | 6657  | 6710  | 0.8%  |
| Stockport NHS Foundation Trust                                | RWJ | 13  | 5540  | 5553  | 0.2%  |
| Surrey and Sussex Healthcare NHS Trust                        | RTP | 64  | 4040  | 4104  | 1.6%  |
| Tameside Hospital NHS Foundation Trust                        | RMP | 33  | 4815  | 4848  | 0.7%  |
| Taunton and Somerset NHS Foundation Trust                     | RBA | 44  | 4730  | 4774  | 0.9%  |
| The Dudley Group Of Hospitals NHS Foundation Trust            | RNA | 11  | 6993  | 7004  | 0.2%  |
| The Hillingdon Hospital NHS Trust                             | RAS | 65  | 4475  | 4540  | 1.4%  |
| The Lewisham Healthcare NHSTrust                              | RJ2 | 601 | 11875 | 12476 | 4.8%  |
| The Mid Cheshire Hospitals NHS Trust                          | RBT | 27  | 5159  | 5186  | 0.5%  |
| The Rotherham NHS Foundation Trust                            | RFR | -   | -     | 3967  | <0.1% |
| The Walton Centre NHS Foundation Trust                        | RET | 7   | 34    | 41    | ####  |
| United Lincolnshire Hospitals NHS Trust                       | RWD | 77  | 8350  | 8427  | 0.9%  |
| University College London Hospitals NHS Foundation Trust      | RRV | 124 | 2406  | 2530  | 4.9%  |
| University Hospital Birmingham NHS Foundation Trust           | RRK | 16  | 788   | 804   | 2.0%  |
| University Hospital Of North Staffordshire Hospital NHS Trust | RJE | 42  | 13351 | 13393 | 0.3%  |
| University Hospital Of South Manchester NHS Foundation Trust  | RM2 | 32  | 6607  | 6639  | 0.5%  |
| University Hospitals Coventry and Warwickshire NHS Trust      | RKB | 39  | 8421  | 8460  | 0.5%  |
| University Hospitals Of Bristol NHS Foundation Trust          | RA7 | 120 | 9975  | 10095 | 1.2%  |

|                                                            |     |       |        |        |      |
|------------------------------------------------------------|-----|-------|--------|--------|------|
| University Hospitals Of Leicester NHS Trust                | RWE | 403   | 9514   | 9917   | 4.1% |
| University Hospitals Of Morecambe Bay NHS Foundation Trust | RTX | 62    | 6775   | 6837   | 0.9% |
| Walsall Hospitals NHS Trust                                | RBK | 13    | 3350   | 3363   | 0.4% |
| Warrington and Halton Hospitals NHS Foundation Trust       | RWW | 60    | 5048   | 5108   | 1.2% |
| West Hertfordshire Hospitals NHS Trust                     | RWG | 29    | 5521   | 5550   | 0.5% |
| West Middlesex University NHS Trust                        | RFW | 34    | 3098   | 3132   | 1.1% |
| West Suffolk Hospital NHS Trust                            | RGR | 25    | 4007   | 4032   | 0.6% |
| WesternSussexHospitals NHSTrust                            | RYR | 35    | 7452   | 7487   | 0.5% |
| Weston Area Health NHSTrust                                | RA3 | 17    | 852    | 869    | 2.0% |
| Whittington Hospital NHSTrust                              | RKE | 9     | 3518   | 3527   | 0.3% |
| Wirral University Teaching Hospital NHS Foundation Trust   | RBL | 97    | 6643   | 6740   | 1.4% |
| Worcestershire Acute Hospitals NHS Trust                   | RWP | 24    | 7270   | 7294   | 0.3% |
| Wrightington, Wigan and Leigh NHS Foundation Trust         | RRF | 8     | 3106   | 3114   | 0.3% |
| Yeovil District Hospital NHS Foundation Trust              | RA4 | 24    | 2182   | 2206   | 1.1% |
| York Hospitals NHSTrust                                    | RCB | 66    | 7723   | 7789   | 0.8% |
| Total                                                      |     | 10564 | 854667 | 887296 | 1.2% |

Notes. Where 5 or fewer invalid cases, number is suppressed
