# Supplementary material for: Use of age-specific hospital catchment populations to investigate geographical variation in inpatient admissions for children and young people in England: retrospective, cross-sectional study
Source: PubMed Central journal article supplement — BMJ Open. 2018 Jul 10;8(7):e022339. doi: 10.1136/bmjopen-2018-022339 (PMC6082474; doi:10.1136/bmjopen-2018-022339), 2018-07-10
Supplement: bmjopen-2018-022339supp002.pdf [file bmjopen-2018-022339supp002.pdf]

**Appendix Table A2: Paediatric hospital catchment populations by Trust and year, English  
Hospital Episode Statistics 2011/12-2014/15**

|     |                                                                    |                                           | 2011/12 | 2012/13 | 2013/14 | 2014/15 |
|-----|--------------------------------------------------------------------|-------------------------------------------|---------|---------|---------|---------|
| REM | Aintree University Hospitals NHS Foundation Trust                  | North West                                | 10023   | 10327   | 8631    | 10848   |
| RCF | Airedale NHS Foundation Trust                                      | Yorkshire and<br>The Humber               | 41949   | 39720   | 43968   | 43450   |
| RBS | Alder Hey Childrens NHS Foundation Trust                           | North West                                | 135592  | 135873  | 135226  | 134281  |
| RTK | Ashford and St Peter's Hospitals NHS Foundation<br>Trust           | South East<br>Coast                       | 67507   | 66359   | 67714   | 67049   |
| RF4 | Barking, Havering and Redbridge University Hospitals<br>NHS Trust  | London                                    | 197275  | 149765  | 149133  | 145366  |
| RVL | Barnet and Chase Farm Hospitals NHS Trust                          | London                                    | 127294  | 127254  | 113094  | .       |
| RFF | Barnsley Dist Gen Hosp NHS Foundation Trust                        | Yorkshire and<br>The Humber               | 50808   | 51686   | 51165   | 52966   |
| R1H | Barts Health NHS Trust                                             | London                                    | 12668   | 267307  | 270243  | 268558  |
| RDD | Basildon and Thurrock University Hospitals NHS<br>Foundation Trust | East of England                           | 78568   | 72928   | 75975   | 77489   |
| RN5 | Basingstoke and North Hampshire Hospitals NHS<br>Foundation Trust  | South Central                             | 85695   | 102867  | 101435  | 99421   |
| RC1 | Bedford Hospital NHS Trust                                         | East of England                           | 47451   | 49333   | 32284   | 48718   |
| RQ3 | Birmingham Children's Hospital NHS Foundation Trust                | West Midlands                             | 167662  | 166577  | 162074  | 159686  |
| RR1 | Birmingham Heartlands and Solihull Trust                           | West Midlands                             | 179182  | 175711  | 173618  | 180098  |
| RLU | Birmingham Women's NHS Foundation Trust                            | West Midlands                             | 2622    | 2783    | 2526    | 2897    |
| RXL | Blackpool Fylde and Wyre NHS Foundation Trust                      | North West<br>Yorkshire and<br>The Humber | 58761   | 59309   | 59561   | 60397   |
| RAE | Bradford Teaching Hospitals NHS Foundation Trust                   | South East                                | 113843  | 114617  | 111292  | 111030  |
| RXH | Brighton and Sussex University Hospitals NHS Trust                 | Coast                                     | 95573   | 99438   | 103746  | 105282  |
| RXQ | Buckinghamshire Healthcare NHS Trust                               | South Central                             | 102622  | 99708   | 96197   | 99550   |
| RJF | Burton Hospitals NHS Foundation Trust                              | West Midlands                             | 58296   | 60052   | 62031   | 61559   |
| RWY | Calderdale and Huddersfield NHS Foundation Trust                   | Yorkshire and<br>The Humber               | 96587   | 95166   | 96430   | 95715   |
| RGT | Cambridge University Hospitals NHS Foundation Trust                | East of England                           | 94724   | 93112   | 94595   | 94647   |
| RYV | Cambridgeshire Community Services NHS Trust                        | East of England                           | 36498   | 38274   | 38476   | 38372   |
| RW3 | Central Manchester University Hospitals NHS<br>Foundation Trust    | North West                                | 129668  | 123097  | 131327  | 134340  |
| RQM | Chelsea and Westminster Hospital NHS Foundation<br>Trust           | London                                    | 90449   | 93355   | 88865   | 86439   |
| RFS | Chesterfield Royal Hospital NHS Foundation Trust                   | East Midlands                             | 55086   | 56540   | 55790   | 56603   |
| RBV | Christie Hospital NHS Trust                                        | North West                                | 249     | 71      | 202     | 231     |
| RLN | City Hospitals Sunderland NHS Foundation Trust                     | North East                                | 61855   | 60998   | 63551   | 63650   |
| REN | Clatterbridge Centre For Oncology NHS Foundation<br>Trust          | North West                                | 61      | 17      | .       | 45      |
| RDE | Colchester Hospital University NHS Foundation Trust                | East of England                           | 72893   | 71762   | 74634   | 75048   |
| RJR | Countess Of Chester Hospital NHS Foundation Trust                  | North West                                | 43561   | 43650   | 42978   | 43204   |
| RXP | County Durham and Darlington NHS Foundation Trust                  | North East                                | 107566  | 108332  | 107119  | 108941  |
| RJ6 | Croydon Health Services NHS Trust                                  | London<br>South East                      | 81355   | 78015   | 78090   | 77160   |
| RN7 | Dartford and Gravesham NHS Trust                                   | Coast                                     | 76140   | 73911   | 78523   | 77768   |
| RTG | Derby Hospitals NHS Foundation Trust                               | East Midlands                             | 101760  | 103757  | 104768  | 101709  |
| RP5 | Doncaster and Bassetlaw Hospitals NHS Foundation<br>Trust          | Yorkshire and<br>The Humber               | 102095  | 100803  | 98480   | 100244  |
| RBD | Dorset County Hospital NHS Foundation Trust                        | South West                                | 40217   | 40655   | 39469   | 38763   |

|     |                                                               |                          |        |        |        |        |
|-----|---------------------------------------------------------------|--------------------------|--------|--------|--------|--------|
| RC3 | Ealing Hospital NHS Trust                                     | London                   | 58077  | 53775  | 52820  | .      |
| RWH | East and North Hertfordshire NHS Trust                        | East of England          | 110674 | 104026 | 106784 | 105074 |
| RJN | East Cheshire NHS Trust                                       | North West               | 38204  | 36740  | 36029  | 35913  |
| RVV | East Kent Hospitals University NHS Foundation Trust           | South East Coast         | 137896 | 137059 | 138382 | 141973 |
| RXR | East Lancashire Hospitals NHS Trust                           | North West               | 116271 | 119014 | 118240 | 117300 |
| RXC | East Sussex Hospitals NHS Trust                               | South East Coast         | 80445  | 77868  | 73828  | 73412  |
| RVR | Epsom and St Helier University Hospitals NHS Trust            | London                   | 87348  | 83731  | 81162  | 85745  |
| RDU | Frimley Park Hospital NHS Trust                               | South East Coast         | 80008  | 85799  | 88597  | 190069 |
| RR7 | Gateshead Health NHS Foundation Trust                         | North East               | 43832  | 43763  | 38241  | 36789  |
| RLT | George Eliot Hospital NHS Trust                               | West Midlands            | 30544  | 29618  | 20570  | 19381  |
| RTE | Gloucestershire Hospitals NHS Foundation Trust                | South West               | 120471 | 120927 | 120459 | 119516 |
| RP4 | Great Ormond Street Hospital NHS Trust                        | London                   | 44418  | 17789  | 7456   | 6236   |
| RN3 | Great Western Hospitals NHS Foundation Trust                  | South West               | 79223  | 78668  | 79347  | 82167  |
| RJ1 | Guy's and St Thomas' NHS Foundation Trust                     | London                   | 85083  | 69753  | 71571  | 64902  |
| RCD | Harrogate and District NHS Foundation Trust                   | Yorkshire and The Humber | 40531  | 40823  | 40145  | 40560  |
| RD7 | Heatherwood and Wexham Park Hosps NHS Foundation Trust        | South Central            | 99093  | 99936  | 100829 | .      |
| RLQ | Hereford Hospitals NHS Trust                                  | West Midlands            | 38422  | 37728  | 38147  | 39130  |
| RQQ | Hinchingbrooke Healthcare NHS Trust                           | East of England          | 7964   | 6273   | 6811   | 6738   |
| RQX | Homerton University Hospital NHS Foundation Trust             | London                   | 89851  | 52951  | 52578  | 49332  |
| RWA | Hull and East Yorkshire Hospitals NHS Trust                   | Yorkshire and The Humber | 105424 | 106722 | 106685 | 106281 |
| RYJ | Imperial College Healthcare NHS Trust                         | London                   | 72424  | 67571  | 74510  | 75876  |
| RGQ | Ipswich Hospital NHS Trust                                    | East of England          | 71307  | 71010  | 71234  | 71379  |
| R1F | Isle of wight NHS Trust                                       | South Central            | .      | 31154  | 30292  | 28924  |
| RGP | James Paget University Hospitals NHS Foundation Trust         | East of England          | 46037  | 45337  | 44979  | 43863  |
| RNQ | Kettering General Hospital NHS Foundation Trust               | East Midlands            | 68698  | 69630  | 68806  | 67436  |
| RJZ | King's College Hospital NHS Foundation Trust                  | London                   | 88602  | 86947  | 148099 | 150224 |
| RAX | Kingston Hospital NHS Trust                                   | London                   | 75380  | 68716  | 69583  | 70421  |
| RXN | Lancashire Teaching Hospitals NHSTrust                        | North West               | 87179  | 87630  | 88836  | 87841  |
| RR8 | Leeds Teaching Hospitals NHS Trust                            | Yorkshire and The Humber | 153920 | 148568 | 150597 | 151367 |
| RBQ | Liverpool Heart and Chest NHS Foundation Trust                | North West               | 106    | 20     | 47     | 64     |
| REP | Liverpool Womens Hospital NHS Trust                           | North West               | 1656   | 1833   | 3561   | 2475   |
| R1K | London North West Healthcare NHS Trust                        | London                   | .      | .      | 486    | 166660 |
| RC9 | Luton and Dunstable Hospital NHS Foundation Trust             | East of England          | 96418  | 95475  | 95886  | 96289  |
| RWF | Maidstone and Tunbridge Wells NHS Trust                       | South East Coast         | 105941 | 102464 | 103455 | 104481 |
| RPA | Medway NHS Trust                                              | South East Coast         | 95192  | 94535  | 92696  | 92044  |
| RQ8 | Mid Essex Hospital Services NHS Trust                         | East of England          | 120888 | 107718 | 101410 | 100503 |
| RJD | Mid Staffordshire NHS Foundation Trust                        | West Midlands            | 51662  | 48065  | 47435  | 26235  |
| RXF | Mid Yorkshire Hospitals NHS Trust                             | Yorkshire and The Humber | 132650 | 133511 | 135039 | 133869 |
| RD8 | Milton Keynes Hospital NHS Foundation Trust                   | South Central            | 68637  | 69072  | 79382  | 68737  |
| RP6 | Moorfields Eye Hospital NHS Foundation Trust                  | London                   | 1824   | 916    | 916    | 843    |
| RTD | Newcastle Upon Tyne Hospitals NHS Foundation Trust            | North East               | 117233 | 117214 | 121658 | 124257 |
| RM1 | Norfolk and Norwich University Hospitals NHS Foundation Trust | East of England          | 116286 | 114535 | 114161 | 118394 |

|     |                                                          |                                        |        |        |        |        |
|-----|----------------------------------------------------------|----------------------------------------|--------|--------|--------|--------|
| RVJ | North Bristol NHS Trust                                  | South West                             | 49997  | 45687  | 48493  | 19435  |
| RNL | North Cumbria University Hospitals NHS Trust             | North West                             | 66588  | 66042  | 66633  | 66748  |
| RJL | North Lincolnshire and Goole Hosps NHS Foundation Trust  | Yorkshire and The Humber               | 87840  | 89727  | 87901  | 87428  |
| RAP | North Middlesex University Hospital NHS Trust            | London                                 | 69610  | 59956  | 74570  | 96137  |
| RVW | North Tees and Hartlepool NHS Foundation Trust           | North East                             | 62654  | 62927  | 61569  | 61068  |
| RV8 | North West London Hospitals NHS Trust                    | London                                 | 124936 | 122553 | 120266 | .      |
| RNS | Northampton General Hospital NHS Trust                   | East Midlands                          | 79616  | 79064  | 79996  | 80178  |
| RBZ | Northern Devon Healthcare NHS Trust                      | South West                             | 36726  | 36767  | 35147  | 34821  |
| RTF | Northumbria Healthcare NHS Foundation Trust              | North East                             | 66237  | 66331  | 67151  | 65421  |
| RX1 | Nottingham University Hospitals NHS Trust                | East Midlands                          | 171690 | 169301 | 169578 | 172520 |
| RTH | Oxford Radcliffe Hospital NHS Trust                      | South Central                          | 150782 | 149553 | 152788 | 153875 |
| RGM | Papworth Hospital NHS Foundation Trust                   | East of England                        | 152    | 109    | 60     | 69     |
| RW6 | Pennine Acute Hospitals NHS Trust                        | North West                             | 181461 | 177490 | 174316 | 172774 |
| RGN | Peterborough and Stamford Hospitals NHS Foundation Trust | East of England                        | 76073  | 78570  | 78495  | 79335  |
| RK9 | Plymouth Hospitals NHS Trust                             | South West                             | 94298  | 94886  | 93753  | 93846  |
| RD3 | Poole Hospital NHS Foundation Trust                      | South West                             | 100557 | 97418  | 97080  | 97422  |
| RHU | Portsmouth Hospitals NHS Trust                           | South Central                          | 126870 | 123691 | 124823 | 118416 |
| RQW | Princess Alexandra Hospital NHS Trust                    | East of England                        | 65509  | 62257  | 62667  | 61910  |
| RCX | Queen Elizabeth Hospital Kings Lynn NHS Foundation Trust | East of England South East Coast       | 46079  | 45410  | 46035  | 44609  |
| RPC | Queen Victoria Hospital NHS Foundation Trust             | Coast                                  | 30623  | 31677  | 32219  | 28764  |
| RL1 | Robert Jones and Agnes Hunt Orthopaedic NHS Trust        | West Midlands                          | 386    | 179    | 68     | 93     |
| RHW | Royal Berkshire Hospital NHS Foundation Trust            | South Central                          | 107907 | 103139 | 101569 | 100771 |
| RMC | Royal Bolton Hospital NHS Foundation Trust               | North West                             | 82536  | 84113  | 84077  | 84314  |
| RDZ | Royal Bournemouth and Christchurch Trust                 | South West                             | 5939   | 7681   | 5662   | 6007   |
| RT3 | Royal Brompton and Harefield NHS Foundation Trust        | London                                 | 5283   | 4361   | 3825   | 3899   |
| REF | Royal Cornwall Hospitals NHS Trust                       | South West                             | 94173  | 94210  | 91643  | 91698  |
| RH8 | Royal Devon and Exeter NHS Foundation Trust              | South West                             | 75572  | 76294  | 75519  | 78322  |
| RAL | Royal Free Hampstead NHS Trust                           | London                                 | 52443  | 50068  | 48224  | 155113 |
| RQ6 | Royal Liverpool Broadgreen Hospitals NHS Trust           | North West                             | 12435  | 11431  | 12377  | 12110  |
| RBB | Royal Nat Hosp Rheumatic Diseases NHS Trust              | South West                             | 24     | 24     | .      | .      |
| RRJ | Royal Orthopaedic Hospital NHS Foundation Trust          | West Midlands South East Coast         | 343    | 209    | 293    | 405    |
| RA2 | Royal Surrey County NHS Foundation Trust                 | Coast                                  | 69295  | 69069  | 68703  | 67670  |
| RD1 | Royal United Hospital Bath NHS Trust                     | South West                             | 91687  | 92969  | 93205  | 92029  |
| RL4 | Royal Wolverhampton Hospital NHS Trust                   | West Midlands                          | 76825  | 76809  | 79145  | 79276  |
| RM3 | Salford Royal NHS Foundation Trust                       | North West                             | 36907  | 36818  | 34678  | 34985  |
| RNZ | Salisbury NHS Foundation Trust                           | South West                             | 53602  | 47693  | 47618  | 47659  |
| RXK | Sandwell and West Birmingham Hospitals NHS Trust         | West Midlands Yorkshire and The Humber | 94462  | 94120  | 98396  | 100183 |
| RCC | Scarborough and North East Yorkshire NHS Trust           | The Humber                             | 35573  | .      | .      | .      |
| RCU | Sheffield Children's NHS Foundation Trust                | Yorkshire and The Humber               | 115371 | 116009 | 117548 | 102197 |
| RHQ | Sheffield Teaching Hospitals NHS Foundation Trust        | Yorkshire and The Humber               | 18502  | 18740  | 19406  | 27899  |
| RK5 | Sherwood Forest Hospitals NHS Foundation Trust           | East Midlands                          | 69176  | 70373  | 70109  | 70777  |
| RXW | Shrewsbury and Telford Hospital NHS Trust                | West Midlands                          | 100221 | 101232 | 100641 | 102368 |
| RA9 | South Devon Health Care NHS Trust                        | South West                             | 49907  | 50574  | 50908  | 50569  |
| RYQ | South London Healthcare NHS Trust                        | London                                 | 139032 | 147968 | 39830  | .      |

|     |                                                               |                          |        |        |        |        |
|-----|---------------------------------------------------------------|--------------------------|--------|--------|--------|--------|
| RTR | South Tees Hospitals NHS Foundation Trust                     | North East               | 97604  | 97851  | 97981  | 98197  |
| RE9 | South Tyneside NHS Foundation Trust                           | North East               | 25878  | 25367  | 24299  | 23625  |
| RJC | South Warwickshire NHS Foundation Trust                       | West Midlands            | 46900  | 47121  | 47468  | 46629  |
| RHM | Southampton University Hospitals NHS Trust                    | South Central            | 134343 | 115636 | 117210 | 120636 |
| RAJ | Southend University Hospitals NHS Foundation Trust            | East of England          | 65574  | 66876  | 68295  | 66039  |
| RVY | Southport and Ormskirk Hospital NHS Trust                     | North West               | 53815  | 53137  | 51841  | 53484  |
| RJ7 | St George's Healthcare NHS Trust                              | London                   | 103559 | 109089 | 113127 | 118041 |
| RBN | St Helens and Knowsley Hospitals NHS Trust                    | North West               | 61878  | 65500  | 65986  | 67966  |
| RWJ | Stockport NHS Foundation Trust                                | North West               | 66698  | 68799  | 65856  | 63583  |
| RTP | Surrey and Sussex Healthcare NHS Trust                        | South East Coast         | 95076  | 92811  | 93180  | 83612  |
| RMP | Tameside Hospital NHS Foundation Trust                        | North West               | 47340  | 48784  | 47877  | 48707  |
| RBA | Taunton and Somerset NHS Foundation Trust                     | South West               | 67189  | 67320  | 66528  | 66116  |
| RNA | The Dudley Group Of Hospitals NHS Foundation Trust            | West Midlands            | 82101  | 82900  | 80817  | 81498  |
| RAS | The Hillingdon Hospital NHS Trust                             | London                   | 65107  | 61012  | 61198  | 65195  |
| RJ2 | The Lewisham Healthcare NHS Trust                             | London                   | 62637  | 61055  | 103280 | 151669 |
| RBT | The Mid Cheshire Hospitals NHS Trust                          | North West               | 57013  | 54683  | 57962  | 56699  |
| RFR | The Rotherham NHS Foundation Trust                            | Yorkshire and The Humber | 53392  | 51784  | 50347  | 52577  |
| RPY | The Royal Marsden NHS Foundation Trust                        | London                   | 382    | 216    | 348    | 104    |
| RAN | The Royal National Orthopaedic Hospital NHS Trust             | London                   | 973    | 529    | 289    | 409    |
| RET | The Walton Centre NHS Foundation Trust                        | North West               | 440    | 263    | 255    | 281    |
| RWD | United Lincolnshire Hospitals NHS Trust                       | East Midlands            | 118708 | 115559 | 115924 | 112401 |
| RRV | University College London Hospitals NHS Foundation Trust      | London                   | 52193  | 39854  | 42780  | 42106  |
| RRK | University Hospital Birmingham NHS Foundation Trust           | West Midlands            | 11362  | 10510  | 12108  | 10979  |
| RJE | University Hospital Of North Staffordshire Hospital NHS Trust | West Midlands            | 107959 | 108300 | 110705 | 127581 |
| RM2 | University Hospital Of South Manchester NHS Foundation Trust  | North West               | 70604  | 70443  | 70896  | 71403  |
| RKB | University Hospitals Coventry and Warwickshire NHS Trust      | West Midlands            | 116634 | 116159 | 126521 | 126537 |
| RA7 | University Hospitals Of Bristol NHS Foundation Trust          | South West               | 145749 | 145288 | 145188 | 172827 |
| RWE | University Hospitals Of Leicester NHS Trust                   | East Midlands            | 188490 | 188424 | 189865 | 192382 |
| RTX | University Hospitals Of Morecambe Bay NHS Foundation Trust    | North West               | 69612  | 68370  | 67995  | 68522  |
| RBK | Walsall Hospitals NHS Trust                                   | West Midlands            | 56799  | 58354  | 56452  | 55821  |
| RWW | Warrington and Halton Hospitals NHS Foundation Trust          | North West               | 64831  | 63822  | 61770  | 61421  |
| RWG | West Hertfordshire Hospitals NHS Trust                        | East of England          | 91480  | 91916  | 97486  | 95384  |
| RFW | West Middlesex University NHS Trust                           | London                   | 59734  | 65428  | 67430  | 63584  |
| RGR | West Suffolk Hospital NHS Trust                               | East of England          | 57097  | 58326  | 57180  | 56939  |
| RYR | Western Sussex Hospitals NHS Trust                            | South East Coast         | 96626  | 94666  | 91769  | 94045  |
| RA3 | Weston Area Health NHS Trust                                  | South West               | 13122  | 11742  | 12538  | 13040  |
| RKE | Whittington Hospital NHS Trust                                | London                   | 53355  | 50811  | 51311  | 50647  |
| RBL | Wirral University Teaching Hospital NHS Foundation Trust      | North West               | 71996  | 72292  | 72743  | 72140  |
| RWP | Worcestershire Acute Hospitals NHS Trust                      | West Midlands            | 120307 | 118484 | 117303 | 115581 |
| RRF | Wrightington, Wigan and Leigh NHS Foundation Trust            | North West               | 52988  | 53106  | 52291  | 51486  |
| RA4 | Yeovil District Hospital NHS Foundation Trust                 | South West               | 37273  | 38748  | 37598  | 35923  |
| RCB | York Hospitals NHS Trust                                      | Yorkshire and The Humber | 70501  | 105737 | 103237 | 104298 |
