# Supplementary material for: Use of age-specific hospital catchment populations to investigate geographical variation in inpatient admissions for children and young people in England: retrospective, cross-sectional study
Source: PubMed Central journal article supplement — BMJ Open. 2018 Jul 10;8(7):e022339. doi: 10.1136/bmjopen-2018-022339 (PMC6082474; doi:10.1136/bmjopen-2018-022339), 2018-07-10
Supplement: bmjopen-2018-022339supp003.pdf [file bmjopen-2018-022339supp003.pdf]

**Appendix Table A3. Paediatric hospital catchment populations by Trust, deprivation quintile, English Hospital Episode Statistics, 2013/14**

|     |                                                                 | Deprivation quintile |       |       |       |       | Total  | % in most deprived quintile | % in least deprived quintile |
|-----|-----------------------------------------------------------------|----------------------|-------|-------|-------|-------|--------|-----------------------------|------------------------------|
|     |                                                                 | 1 (Most deprived)    | 2     | 3     | 4     | 5     |        |                             |                              |
| REM | Aintree University Hospitals NHS Foundation Trust               | 4330                 | 1126  | 1903  | 891   | 381   | 8631   | 50.2%                       | 4.4%                         |
| RCF | Airedale NHS Foundation Trust                                   | 9488                 | 5421  | 8214  | 12856 | 7989  | 43968  | 21.6%                       | 18.2%                        |
| RBS | Alder Hey Childrens NHS Foundation Trust                        | 78577                | 18715 | 17336 | 12477 | 8121  | 135226 | 58.1%                       | 6.0%                         |
| RTK | Ashford and St Peter's Hospitals NHS Foundation Trust           | 803                  | 6579  | 10863 | 14707 | 34762 | 67714  | 1.2%                        | 51.3%                        |
| RF4 | Barking, Havering and Redbridge University Hospitals NHS Trust  | 35894                | 49190 | 31992 | 20717 | 11341 | 149133 | 24.1%                       | 7.6%                         |
| RVL | Barnet and Chase Farm Hospitals NHS Trust                       | 13252                | 24820 | 31417 | 28228 | 15377 | 113094 | 11.7%                       | 13.6%                        |
| RFF | Barnsley Dist Gen Hosp NHS Foundation Trust                     | 16847                | 14899 | 9311  | 6467  | 3641  | 51165  | 32.9%                       | 7.1%                         |
| R1H | Barts Health NHS Trust                                          | 163144               | 60604 | 24847 | 13148 | 8500  | 270243 | 60.4%                       | 3.1%                         |
| RDD | Basildon and Thurrock University Hospitals NHS Foundation Trust | 14521                | 20050 | 13825 | 11279 | 16300 | 75975  | 19.1%                       | 21.5%                        |
| RN5 | Basingstoke and North Hampshire Hospitals NHS Foundation Trust  | 818                  | 13145 | 13577 | 20675 | 53220 | 101435 | 0.8%                        | 52.5%                        |
| RC1 | Bedford Hospital NHS Trust                                      | 3233                 | 5913  | 5603  | 7476  | 10060 | 32284  | 10.0%                       | 31.2%                        |
| RQ3 | Birmingham Children's Hospital NHS Foundation Trust             | 91604                | 28586 | 25106 | 9722  | 7055  | 162074 | 56.5%                       | 4.4%                         |
| RR1 | Birmingham Heartlands and Solihull Trust                        | 82911                | 22330 | 23792 | 21020 | 23566 | 173618 | 47.8%                       | 13.6%                        |
| RLU | Birmingham Women's NHS Foundation Trust                         | 1146                 | 576   | 459   | 271   | 74    | 2526   | 45.4%                       | 2.9%                         |
| RXL | Blackpool Fylde and Wyre NHS Foundation Trust                   | 19392                | 11532 | 11532 | 9706  | 7400  | 59561  | 32.6%                       | 12.4%                        |
| RAE | Bradford Teaching Hospitals NHS Foundation Trust                | 66484                | 20131 | 13399 | 6629  | 4650  | 111292 | 59.7%                       | 4.2%                         |
| RXH | Brighton and Sussex University Hospitals NHS Trust              | 12242                | 21734 | 24955 | 22064 | 22751 | 103746 | 11.8%                       | 21.9%                        |
| RXQ | Buckinghamshire Healthcare NHS Trust                            | 375                  | 15533 | 13666 | 16674 | 49949 | 96197  | 0.4%                        | 51.9%                        |
| RJF | Burton Hospitals NHS Foundation Trust                           | 8028                 | 10883 | 13795 | 16333 | 12992 | 62031  | 12.9%                       | 20.9%                        |
| RWY | Calderdale and Huddersfield NHS Foundation Trust                | 26028                | 23462 | 15310 | 19005 | 12625 | 96430  | 27.0%                       | 13.1%                        |
| RGT | Cambridge University Hospitals NHS Foundation Trust             | 1607                 | 10992 | 14338 | 25244 | 42414 | 94595  | 1.7%                        | 44.8%                        |
| RYV | Cambridgeshire Community Services NHS Trust                     | 302                  | 4165  | 10028 | 7652  | 16328 | 38476  | 0.8%                        | 42.4%                        |
| RW3 | Central Manchester University Hospitals NHS Foundation Trust    | 67086                | 27353 | 16708 | 11774 | 8406  | 131327 | 51.1%                       | 6.4%                         |
| RQM | Chelsea and Westminster Hospital NHS Foundation Trust           | 16640                | 26815 | 19308 | 19858 | 6244  | 88865  | 18.7%                       | 7.0%                         |
| RFS | Chesterfield Royal Hospital NHS Foundation Trust                | 11262                | 14747 | 10348 | 11926 | 7507  | 55790  | 20.2%                       | 13.5%                        |
| RBV | Christie Hospital NHS Trust                                     | 86                   | 50    | 0     | 27    | 39    | 202    | 42.5%                       | 19.5%                        |
| RLN | City Hospitals Sunderland NHS Foundation Trust                  | 26687                | 18178 | 8391  | 7604  | 2691  | 63551  | 42.0%                       | 4.2%                         |
| RDE | Colchester Hospital University NHS Foundation Trust             | 7259                 | 16058 | 17471 | 21094 | 12753 | 74634  | 9.7%                        | 17.1%                        |
| RJR | Countess Of Chester Hospital NHS Foundation Trust               | 9307                 | 3990  | 5177  | 9655  | 14849 | 42978  | 21.7%                       | 34.6%                        |
| RXP | County Durham and Darlington NHS Foundation Trust               | 31670                | 30286 | 17175 | 15061 | 12927 | 107119 | 29.6%                       | 12.1%                        |

|     |                                                        |       |       |       |       |       |        |       |       |
|-----|--------------------------------------------------------|-------|-------|-------|-------|-------|--------|-------|-------|
| RJ6 | Croydon Health Services NHS Trust                      | 17433 | 28190 | 18334 | 9300  | 4833  | 78090  | 22.3% | 6.2%  |
| RN7 | Dartford and Gravesham NHS Trust                       | 9887  | 18819 | 16535 | 18000 | 15283 | 78523  | 12.6% | 19.5% |
| RTG | Derby Hospitals NHS Foundation Trust                   | 22327 | 19085 | 20936 | 18375 | 24044 | 104768 | 21.3% | 23.0% |
| RP5 | Doncaster and Bassetlaw Hospitals NHS Foundation Trust | 37755 | 22141 | 18484 | 16150 | 3949  | 98480  | 38.3% | 4.0%  |
| RBD | Dorset County Hospital NHS Foundation Trust            | 3473  | 6672  | 15169 | 10100 | 4054  | 39469  | 8.8%  | 10.3% |
| RC3 | Ealing Hospital NHS Trust                              | 13677 | 19798 | 14306 | 3900  | 1139  | 52820  | 25.9% | 2.2%  |
| RWH | East and North Hertfordshire NHS Trust                 | 1696  | 12240 | 25595 | 24728 | 42525 | 106784 | 1.6%  | 39.8% |
| RJN | East Cheshire NHS Trust                                | 1827  | 4965  | 6152  | 6945  | 16141 | 36029  | 5.1%  | 44.8% |
| RVV | East Kent Hospitals University NHS Foundation Trust    | 26345 | 30829 | 35972 | 34287 | 10948 | 138382 | 19.0% | 7.9%  |
| RXR | East Lancashire Hospitals NHS Trust                    | 54726 | 24499 | 11565 | 19053 | 8398  | 118240 | 46.3% | 7.1%  |
| RXC | East Sussex Hospitals NHS Trust                        | 15541 | 20009 | 16409 | 14715 | 7152  | 73828  | 21.1% | 9.7%  |
| RVR | Epsom and St Helier University Hospitals NHS Trust     | 2557  | 14032 | 13354 | 18218 | 33002 | 81162  | 3.1%  | 40.7% |
| RDU | Frimley Park Hospital NHS Trust                        | 826   | 5337  | 11567 | 16677 | 54189 | 88597  | 0.9%  | 61.2% |
| RR7 | Gateshead Health NHS Foundation Trust                  | 15875 | 10622 | 4335  | 5199  | 2210  | 38241  | 41.5% | 5.8%  |
| RLT | George Eliot Hospital NHS Trust                        | 3223  | 6192  | 4042  | 4183  | 2931  | 20570  | 15.7% | 14.2% |
| RTE | Gloucestershire Hospitals NHS Foundation Trust         | 10586 | 14006 | 26234 | 31926 | 37706 | 120459 | 8.8%  | 31.3% |
| RP4 | Great Ormond Street Hospital NHS Trust                 | 2151  | 1616  | 1447  | 1269  | 973   | 7456   | 28.8% | 13.1% |
| RN3 | Great Western Hospitals NHS Foundation Trust           | 8184  | 7123  | 12779 | 22039 | 29222 | 79347  | 10.3% | 36.8% |
| RJ1 | Guy's and St Thomas' NHS Foundation Trust              | 23701 | 29293 | 8915  | 6087  | 3576  | 71571  | 33.1% | 5.0%  |
| RCD | Harrrogate and District NHS Foundation Trust           | 492   | 1933  | 7081  | 12804 | 17836 | 40145  | 1.2%  | 44.4% |
| RD7 | Heatherwood and Wexham Park Hosps NHS Foundation Trust | 6085  | 21541 | 23192 | 17741 | 32269 | 100829 | 6.0%  | 32.0% |
| RLQ | Hereford Hospitals NHS Trust                           | 2934  | 4454  | 20545 | 7986  | 2228  | 38147  | 7.7%  | 5.8%  |
| RQQ | Hinchingbrooke Healthcare NHS Trust                    | 12    | 733   | 1351  | 1341  | 3375  | 6811   | 0.2%  | 49.5% |
| RQX | Homerton University Hospital NHS Foundation Trust      | 40697 | 10604 | 673   | 402   | 202   | 52578  | 77.4% | 0.4%  |
| RWA | Hull and East Yorkshire Hospitals NHS Trust            | 35876 | 15750 | 16931 | 18324 | 19804 | 106685 | 33.6% | 18.6% |
| RYJ | Imperial College Healthcare NHS Trust                  | 29567 | 23341 | 11461 | 8231  | 1911  | 74510  | 39.7% | 2.6%  |
| RGQ | Ipswich Hospital NHS Trust                             | 8613  | 8943  | 14027 | 21209 | 18443 | 71234  | 12.1% | 25.9% |
| R1F | Isle of wight NHTrust                                  | 1970  | 10358 | 10936 | 4519  | 2509  | 30292  | 6.5%  | 8.3%  |
| RGP | James Paget University Hospitals NHS Foundation Trust  | 10958 | 10713 | 11872 | 9138  | 2299  | 44979  | 24.4% | 5.1%  |
| RNQ | Kettering General Hospital NHS Foundation Trust        | 11303 | 15898 | 11852 | 12521 | 17233 | 68806  | 16.4% | 25.0% |
| RJZ | King's College Hospital NHS Foundation Trust           | 42747 | 43266 | 19382 | 20404 | 22300 | 148099 | 28.9% | 15.1% |
| RAX | Kingston Hospital NHS Trust                            | 1675  | 5276  | 10568 | 21191 | 30872 | 69583  | 2.4%  | 44.4% |
| RXN | Lancashire Teaching Hospitals NHS Trust                | 21400 | 14101 | 15110 | 18870 | 19355 | 88836  | 24.1% | 21.8% |
| RR8 | Leeds Teaching Hospitals NHS Trust                     | 59934 | 28280 | 20340 | 22620 | 19424 | 150597 | 39.8% | 12.9% |
| RBQ | Liverpool Heart and Chest NHS Foundation Trust         | 0     | 0     | 26    | 22    | 0     | 47     | 0.0%  | 0.0%  |
| REP | Liverpool Womens Hospital NHS Trust                    | 1707  | 707   | 509   | 394   | 244   | 3561   | 48.0% | 6.9%  |
| R1K | London North West Healthcare NHS Trust                 | 97    | 173   | 141   | 45    | 30    | 486    | 19.9% | 6.2%  |
| RC9 | Luton and Dunstable Hospital NHS Foundation Trust      | 17852 | 24434 | 18167 | 14159 | 21275 | 95886  | 18.6% | 22.2% |
| RWF | Maidstone and Tunbridge Wells NHS Trust                | 2895  | 8897  | 19271 | 33793 | 38600 | 103455 | 2.8%  | 37.3% |

|     |                                                               |       |       |       |       |       |        |       |         |
|-----|---------------------------------------------------------------|-------|-------|-------|-------|-------|--------|-------|---------|
| RPA | Medway NHS Trust                                              | 16699 | 28561 | 18476 | 15552 | 13409 | 92696  | 18.0% | 14.5%   |
| RQ8 | Mid Essex Hospital Services NHS Trust                         | 6685  | 14336 | 16855 | 29032 | 34503 | 101410 | 6.6%  | 34.0%   |
| RJD | Mid Staffordshire NHS Foundation Trust                        | 5032  | 9810  | 9988  | 11328 | 11277 | 47435  | 10.6% | 23.8%   |
| RXF | Mid Yorkshire Hospitals NHS Trust                             | 43148 | 38161 | 23923 | 20426 | 9381  | 135040 | 32.0% | 6.9%    |
| RD8 | Milton Keynes Hospital NHS Foundation Trust                   | 10991 | 9702  | 10242 | 20047 | 28400 | 79382  | 13.8% | 35.8%   |
| RP6 | Moorfields Eye Hospital NHS Foundation Trust                  | 127   | 307   | 164   | 197   | 122   | 916    | 13.8% | 13.3%   |
| RTD | Newcastle Upon Tyne Hospitals NHS Foundation Trust            | 40798 | 25120 | 18285 | 17807 | 19648 | 121658 | 33.5% | 16.2%   |
| RM1 | Norfolk and Norwich University Hospitals NHS Foundation Trust | 9602  | 17400 | 32943 | 30205 | 24011 | 114161 | 8.4%  | 21.0%   |
| RVJ | North Bristol NHS Trust                                       | 5764  | 8515  | 9992  | 9720  | 14502 | 48493  | 11.9% | 29.9%   |
| RNL | North Cumbria University Hospitals NHS Trust                  | 12195 | 15376 | 17853 | 13491 | 7719  | 66633  | 18.3% | 11.6%   |
| RJL | North Lincolnshire and Goole Hosps NHS Foundation Trust       | 27606 | 16268 | 17235 | 18122 | 8671  | 87901  | 31.4% | 9.9%    |
| RAP | North Middlesex University Hospital NHS Trust                 | 44361 | 20500 | 5193  | 3151  | 1365  | 74570  | 59.5% | 1.8%    |
| RVW | North Tees and Hartlepool NHS Foundation Trust                | 26629 | 10795 | 8422  | 6195  | 9527  | 61569  | 43.3% | 15.5%   |
| RV8 | North West London Hospitals NHS Trust                         | 16283 | 39133 | 36738 | 17588 | 10523 | 120266 | 13.5% | 8.7%    |
| RNS | Northampton General Hospital NHS Trust                        | 13830 | 14358 | 12007 | 14485 | 25316 | 79996  | 17.3% | 31.6%   |
| RBZ | Northern Devon Healthcare NHS Trust                           | 2620  | 10607 | 13149 | 7557  | 1214  | 35147  | 7.5%  | 3.5%    |
| RTF | Northumbria Healthcare NHS Foundation Trust                   | 17976 | 17426 | 10150 | 9092  | 12507 | 67151  | 26.8% | 18.6%   |
| RX1 | Nottingham University Hospitals NHS Trust                     | 46374 | 32241 | 27468 | 27039 | 36456 | 169578 | 27.3% | 21.5%   |
| RTH | Oxford Radcliffe Hospital NHS Trust                           | 9278  | 14348 | 26218 | 36663 | 66280 | 152788 | 6.1%  | 43.4%   |
| RGM | Papworth Hospital NHS Foundation Trust                        | .     | 26    | 9     | 25    | 0     | 60     | .     | 0.0%    |
| RW6 | Pennine Acute Hospitals NHS Trust                             | 88802 | 32682 | 23049 | 19382 | 10401 | 174316 | 50.9% | 6.0%    |
| RGN | Peterborough and Stamford Hospitals NHS Foundation Trust      | 18004 | 12188 | 13929 | 18527 | 15847 | 78495  | 22.9% | 20.2%   |
| RK9 | Plymouth Hospitals NHS Trust                                  | 16869 | 22361 | 23327 | 22143 | 9054  | 93753  | 18.0% | 9.7%    |
| RD3 | Poole Hospital NHS Foundation Trust                           | 7818  | 19911 | 24083 | 21328 | 23941 | 97080  | 8.1%  | 24.7%   |
| RHU | Portsmouth Hospitals NHS Trust                                | 23318 | 22744 | 22627 | 27470 | 28665 | 124823 | 18.7% | 23.0%   |
| RQW | Princess Alexandra Hospital NHS Trust                         | 2053  | 16719 | 10267 | 13604 | 20024 | 62667  | 3.3%  | 32.0%   |
| RCX | Queen Elizabeth Hospital Kings Lynn NHS Foundation Trust      | 6726  | 15266 | 15078 | 5765  | 3199  | 46035  | 14.6% | 6.9%    |
| RPC | Queen Victoria Hospital NHS Foundation Trust                  | 2846  | 4759  | 6532  | 8203  | 9878  | 32219  | 8.8%  | 30.7%   |
| RL1 | Robert Jones and Agnes Hunt Orthopaedic NHS Trust             | .     | .     | 68    | 0     | 0     | 68     | .     | 0.0%    |
| RHW | Royal Berkshire Hospital NHS Foundation Trust                 | 5565  | 12862 | 13701 | 18695 | 50746 | 101569 | 5.5%  | 50.0%   |
| RMC | Royal Bolton Hospital NHS Foundation Trust                    | 37825 | 16742 | 11573 | 9984  | 7953  | 84077  | 45.0% | 9.5%    |
| RDZ | Royal Bournemouth and Christchurch Trust                      | 552   | 1221  | 1091  | 1222  | 1577  | 5662   | 9.7%  | 27.9%   |
| RT3 | Royal Brompton and Harefield NHS Foundation Trust             | 627   | 863   | 727   | 783   | 825   | 3825   | 16.4% | 21.6%   |
| REF | Royal Cornwall Hospitals NHS Trust                            | 11834 | 35049 | 31587 | 10025 | 3147  | 91643  | 12.9% | 3.4%    |
| RH8 | Royal Devon and Exeter NHS Foundation Trust                   | 5002  | 14847 | 25290 | 21990 | 8391  | 75519  | 6.6%  | 11.1%   |
| RAL | Royal Free Hampstead NHS Trust                                | 7307  | 12331 | 11797 | 13302 | 3487  | 48224  | 15.2% | 7.2%    |
| RQ6 | Royal Liverpool Broadgreen Hospitals NHS Trust                | 7758  | 1640  | 1285  | 1043  | 651   | 12377  | 62.7% | 5.3%    |
| RRJ | Royal Orthopaedic Hospital NHS Foundation Trust               | 165   | 20    | 46    | 61    | .     | 293    | 56.5% | #VALUE! |

|     |                                                               |       |       |       |       |       |        |       |       |
|-----|---------------------------------------------------------------|-------|-------|-------|-------|-------|--------|-------|-------|
| RA2 | Royal Surrey County NHS Foundation Trust                      | 130   | 3177  | 7736  | 16241 | 41419 | 68703  | 0.2%  | 60.3% |
| RD1 | Royal United Hospital Bath NHS Trust                          | 3564  | 10934 | 20295 | 24708 | 33703 | 93205  | 3.8%  | 36.2% |
| RL4 | Royal Wolverhampton Hospital NHS Trust                        | 38204 | 14598 | 10037 | 9724  | 6583  | 79145  | 48.3% | 8.3%  |
| RM3 | Salford Royal NHS Foundation Trust                            | 14387 | 8964  | 5303  | 3709  | 2317  | 34678  | 41.5% | 6.7%  |
| RNZ | Salisbury NHS Foundation Trust                                | 1844  | 2912  | 12705 | 15200 | 14957 | 47618  | 3.9%  | 31.4% |
| RXK | Sandwell and West Birmingham Hospitals NHS Trust              | 63925 | 19339 | 10871 | 2795  | 1467  | 98396  | 65.0% | 1.5%  |
| RCU | Sheffield Children's NHS Foundation Trust                     | 47093 | 18165 | 18857 | 16951 | 16482 | 117548 | 40.1% | 14.0% |
| RHQ | Sheffield Teaching Hospitals NHS Foundation Trust             | 7293  | 3134  | 2764  | 2585  | 3630  | 19406  | 37.6% | 18.7% |
| RK5 | Sherwood Forest Hospitals NHS Foundation Trust                | 22234 | 19767 | 13387 | 10059 | 4664  | 70109  | 31.7% | 6.7%  |
| RXW | Shrewsbury and Telford Hospital NHS Trust                     | 13908 | 23151 | 27882 | 21270 | 14428 | 100641 | 13.8% | 14.3% |
| RA9 | South Devon Health Care NHS Trust                             | 6256  | 14054 | 17329 | 10014 | 3256  | 50908  | 12.3% | 6.4%  |
| RYQ | South London Healthcare NHS Trust                             | 15076 | 12342 | 5257  | 3938  | 3217  | 39830  | 37.8% | 8.1%  |
| RTR | South Tees Hospitals NHS Foundation Trust                     | 35008 | 14193 | 11757 | 21000 | 16022 | 97981  | 35.7% | 16.4% |
| RE9 | South Tyneside NHS Foundation Trust                           | 10715 | 5681  | 3984  | 1815  | 2105  | 24299  | 44.1% | 8.7%  |
| RJC | South Warwickshire NHS Foundation Trust                       | 614   | 4058  | 7501  | 14302 | 20994 | 47468  | 1.3%  | 44.2% |
| RHM | Southampton University Hospitals NHS Trust                    | 17134 | 19498 | 23922 | 23325 | 33332 | 117210 | 14.6% | 28.4% |
| RAJ | Southend University Hospitals NHS Foundation Trust            | 10337 | 13071 | 12891 | 13934 | 18062 | 68295  | 15.1% | 26.4% |
| RVY | Southport and Ormskirk Hospital NHS Trust                     | 9752  | 9350  | 11853 | 12368 | 8518  | 51841  | 18.8% | 16.4% |
| RJ7 | St George's Healthcare NHS Trust                              | 10665 | 35308 | 27079 | 18100 | 21974 | 113127 | 9.4%  | 19.4% |
| RBN | St Helens and Knowsley Hospitals NHS Trust                    | 31345 | 11877 | 10356 | 6307  | 6100  | 65986  | 47.5% | 9.2%  |
| RWJ | Stockport NHS Foundation Trust                                | 9769  | 12674 | 13387 | 13047 | 16979 | 65856  | 14.8% | 25.8% |
| RTP | Surrey and Sussex Healthcare NHS Trust                        | 1107  | 9346  | 21853 | 22473 | 38401 | 93180  | 1.2%  | 41.2% |
| RMP | Tameside Hospital NHS Foundation Trust                        | 18817 | 12474 | 7684  | 5939  | 2963  | 47877  | 39.3% | 6.2%  |
| RBA | Taunton and Somerset NHS Foundation Trust                     | 3979  | 15818 | 20692 | 15615 | 10424 | 66528  | 6.0%  | 15.7% |
| RNA | The Dudley Group Of Hospitals NHS Foundation Trust            | 26610 | 20047 | 10763 | 12208 | 11188 | 80817  | 32.9% | 13.8% |
| RAS | The Hillingdon Hospital NHS Trust                             | 7023  | 25504 | 15414 | 8142  | 5115  | 61198  | 11.5% | 8.4%  |
| RJ2 | The Lewisham Healthcare NHS Trust                             | 38471 | 37675 | 14761 | 7280  | 5094  | 103280 | 37.2% | 4.9%  |
| RBT | The Mid Cheshire Hospitals NHS Trust                          | 9058  | 10142 | 9194  | 10396 | 19172 | 57962  | 15.6% | 33.1% |
| RFR | The Rotherham NHS Foundation Trust                            | 20623 | 13100 | 7143  | 7545  | 1935  | 50347  | 41.0% | 3.8%  |
| RPY | The Royal Marsden NHS Foundation Trust                        | 0     | 107   | 53    | 42    | 147   | 348    | 0.0%  | 42.1% |
| RAN | The Royal National Orthopaedic Hospital NHS Trust             | 42    | 52    | 50    | 117   | 28    | 289    | 14.5% | 9.7%  |
| RET | The Walton Centre NHS Foundation Trust                        | 83    | 36    | 50    | 56    | 31    | 255    | 32.7% | 12.1% |
| RWD | United Lincolnshire Hospitals NHS Trust                       | 18063 | 25037 | 28269 | 25315 | 19240 | 115924 | 15.6% | 16.6% |
| RRV | University College London Hospitals NHS Foundation Trust      | 16229 | 15333 | 5927  | 3409  | 1882  | 42780  | 37.9% | 4.4%  |
| RRK | University Hospital Birmingham NHS Foundation Trust           | 5027  | 2439  | 2473  | 1089  | 1079  | 12108  | 41.5% | 8.9%  |
| RJE | University Hospital Of North Staffordshire Hospital NHS Trust | 39874 | 20414 | 19693 | 20464 | 10260 | 110705 | 36.0% | 9.3%  |
| RM2 | University Hospital Of South Manchester NHS Foundation Trust  | 21407 | 9078  | 9600  | 13012 | 17798 | 70896  | 30.2% | 25.1% |
| RKB | University Hospitals Coventry and Warwickshire NHS Trust      | 31965 | 29721 | 24664 | 22049 | 18122 | 126521 | 25.3% | 14.3% |

|     |                                                            |       |       |       |       |       |        |       |       |
|-----|------------------------------------------------------------|-------|-------|-------|-------|-------|--------|-------|-------|
| RA7 | University Hospitals Of Bristol NHS Foundation Trust       | 26346 | 29029 | 24462 | 28807 | 36544 | 145188 | 18.1% | 25.2% |
| RWE | University Hospitals Of Leicester NHS Trust                | 39869 | 40317 | 28191 | 33490 | 47997 | 189865 | 21.0% | 25.3% |
| RTX | University Hospitals Of Morecambe Bay NHS Foundation Trust | 13063 | 11495 | 15298 | 18906 | 9232  | 67995  | 19.2% | 13.6% |
| RBK | Walsall Hospitals NHS Trust                                | 29584 | 12247 | 5952  | 4564  | 4104  | 56452  | 52.4% | 7.3%  |
| RWW | Warrington and Halton Hospitals NHS Foundation Trust       | 18402 | 9610  | 6976  | 12122 | 14661 | 61770  | 29.8% | 23.7% |
| RWG | West Hertfordshire Hospitals NHS Trust                     | 909   | 13213 | 22267 | 19887 | 41210 | 97486  | 0.9%  | 42.3% |
| RFW | West Middlesex University NHS Trust                        | 5688  | 22475 | 16883 | 13284 | 9100  | 67430  | 8.4%  | 13.5% |
| RGR | West Suffolk Hospital NHS Trust                            | 1041  | 8425  | 12183 | 24686 | 10844 | 57180  | 1.8%  | 19.0% |
| RYR | Western Sussex Hospitals NHSTrust                          | 6118  | 15486 | 30143 | 22225 | 17797 | 91769  | 6.7%  | 19.4% |
| RA3 | Weston Area Health NHSTrust                                | 2191  | 1714  | 2146  | 4229  | 2258  | 12538  | 17.5% | 18.0% |
| RKE | Whittington Hospital NHSTrust                              | 19614 | 18465 | 8121  | 4161  | 950   | 51311  | 38.2% | 1.9%  |
| RBL | Wirral University Teaching Hospital NHS Foundation Trust   | 25451 | 12912 | 10107 | 10590 | 13683 | 72743  | 35.0% | 18.8% |
| RWP | Worcestershire Acute Hospitals NHS Trust                   | 15580 | 17043 | 26647 | 31527 | 26507 | 117303 | 13.3% | 22.6% |
| RRF | Wrightington, Wigan and Leigh NHS Foundation Trust         | 18005 | 11544 | 7010  | 8788  | 6943  | 52291  | 34.4% | 13.3% |
| RA4 | Yeovil District Hospital NHS Foundation Trust              | 1302  | 4053  | 11256 | 15046 | 5942  | 37598  | 3.5%  | 15.8% |
| RCB | York Hospitals NHSTrust                                    | 12363 | 15726 | 20085 | 25537 | 29526 | 103237 | 12.0% | 28.6% |
