# Supplementary material for: Use of age-specific hospital catchment populations to investigate geographical variation in inpatient admissions for children and young people in England: retrospective, cross-sectional study
Source: PubMed Central journal article supplement — BMJ Open. 2018 Jul 10;8(7):e022339. doi: 10.1136/bmjopen-2018-022339 (PMC6082474; doi:10.1136/bmjopen-2018-022339), 2018-07-10
Supplement: bmjopen-2018-022339supp004.pdf [file bmjopen-2018-022339supp004.pdf]

Appendix Table A4

Paediatric hospital catchment populations by Trust, age group, English Hospital Episode Statistics, 2013/14

| Trustcode | Trust name                                                       | Region                                    | Catchment population by age group |       |       |       |       | Total  | % 0-3s |
|-----------|------------------------------------------------------------------|-------------------------------------------|-----------------------------------|-------|-------|-------|-------|--------|--------|
|           |                                                                  |                                           | 0-3                               | 4-7   | 8-11  | 12-15 | 16-18 |        |        |
| REM       | Aintree University Hospitals NHS Foundation Trust                | North East<br>Yorkshire and<br>The Humber | 1818                              | 1744  | 1644  | 1883  | 1541  | 8631   | 21.1%  |
| RCF       | Airedale NHS Foundation Trust                                    | North West                                | 9281                              | 9223  | 8924  | 9434  | 7106  | 43968  | 21.1%  |
| RBS       | Alder Hey Childrens NHS Foundation Trust                         | North West                                | 30231                             | 27712 | 25622 | 28417 | 23244 | 135226 | 22.4%  |
| RTK       | Ashford and St Peter's Hospitals NHS Foundation Trust            | North East                                | 16376                             | 14965 | 13101 | 13060 | 10213 | 67714  | 24.2%  |
| RF4       | Barking, Havering and Redbridge University Hospitals NHS Trust   | North West                                | 34684                             | 33081 | 28805 | 29641 | 22922 | 149133 | 23.3%  |
| RVL       | Barnet and Chase Farm Hospitals NHS Trust                        | North West                                | 26673                             | 24951 | 21694 | 22451 | 17325 | 113094 | 23.6%  |
| RFF       | Barnsley Dist Gen Hosp NHS Foundation Trust                      | North West                                | 11289                             | 10815 | 9764  | 10761 | 8536  | 51165  | 22.1%  |
| R1H       | Barts Health NHS Trust                                           | London                                    | 69552                             | 60372 | 51954 | 50043 | 38322 | 270243 | 25.7%  |
| RDD       | Basilston and Thurrock University Hospitals NHS Foundation Trust | South Central                             | 16850                             | 16379 | 14775 | 15694 | 12277 | 75975  | 22.2%  |
| RNS       | Basingstoke and North Hampshire Hospitals NHS Foundation Trust   | North West                                | 21759                             | 21503 | 19827 | 21349 | 16999 | 101435 | 21.5%  |
| RC1       | Bedford Hospital NHS Trust                                       | South West                                | 7063                              | 6759  | 6401  | 6780  | 5281  | 32284  | 21.9%  |
| RQ3       | Birmingham Children's Hospital NHS Foundation Trust              | South East<br>Coast                       | 37027                             | 34991 | 31558 | 32992 | 25507 | 162074 | 22.8%  |
| RR1       | Birmingham Heartlands and Solihull Trust                         | East of England                           | 37763                             | 37085 | 34660 | 36620 | 27490 | 173618 | 21.8%  |
| RLU       | Birmingham Women's NHS Foundation Trust                          | North East                                | 587                               | 548   | 496   | 509   | 386   | 2526   | 23.3%  |
| RXL       | Blackpool Fylde and Wyre NHS Foundation Trust                    | Yorkshire and<br>The Humber               | 12381                             | 12441 | 11440 | 12976 | 10323 | 59561  | 20.8%  |
| RAE       | Bradford Teaching Hospitals NHS Foundation Trust                 | Yorkshire and<br>The Humber               | 25750                             | 24585 | 22183 | 22373 | 16401 | 111292 | 23.1%  |
| RXH       | Brighton and Sussex University Hospitals NHS Trust               | East Midlands                             | 22502                             | 21982 | 20756 | 21621 | 16885 | 103746 | 21.7%  |
| RXQ       | Buckinghamshire Healthcare NHS Trust                             | North West                                | 20687                             | 20445 | 19419 | 20336 | 15309 | 96197  | 21.5%  |
| RJF       | Burton Hospitals NHS Foundation Trust                            | West Midlands                             | 13021                             | 12902 | 12449 | 13285 | 10375 | 62031  | 21.0%  |
| RWY       | Calderdale and Huddersfield NHS Foundation Trust                 | North West                                | 21300                             | 20517 | 18846 | 20073 | 15695 | 96430  | 22.1%  |
| RGT       | Cambridge University Hospitals NHS Foundation Trust              | East of England                           | 20880                             | 19974 | 18545 | 19299 | 15897 | 94595  | 22.1%  |
| RYV       | Cambridgeshire Community Services NHS Trust                      | London                                    | 8235                              | 7965  | 7611  | 8290  | 6375  | 38476  | 21.4%  |
| RW3       | Central Manchester University Hospitals NHS Foundation Trust     | South East<br>Coast                       | 31203                             | 28764 | 24888 | 25753 | 20719 | 131327 | 23.8%  |
| RQM       | Chelsea and Westminster Hospital NHS Foundation Trust            | West Midlands                             | 24795                             | 20579 | 16881 | 15348 | 11263 | 88865  | 27.9%  |
| RFS       | Chesterfield Royal Hospital NHS Foundation Trust                 | London                                    | 11240                             | 11335 | 10693 | 12389 | 10133 | 55790  | 20.1%  |
| RBV       | Christie Hospital NHS Trust                                      | North West                                | 45                                | 46    | 39    | 41    | 31    | 202    | 22.5%  |
| RLN       | City Hospitals Sunderland NHS Foundation Trust                   | London                                    | 13729                             | 13180 | 12033 | 13529 | 11081 | 63551  | 21.6%  |
| RDE       | Colchester Hospital University NHS Foundation Trust              | South Central                             | 15906                             | 15463 | 14685 | 16014 | 12567 | 74634  | 21.3%  |
| RJR       | Countess Of Chester Hospital NHS Foundation Trust                | West Midlands                             | 8830                              | 9025  | 8486  | 9374  | 7263  | 42978  | 20.5%  |
| RXP       | County Durham and Darlington NHS Foundation Trust                | West Midlands                             | 23118                             | 22459 | 20601 | 22955 | 17986 | 107119 | 21.6%  |
| RJ6       | Croydon Health Services NHS Trust                                | South Central                             | 19036                             | 17326 | 14621 | 15127 | 11979 | 78090  | 24.4%  |
| RN7       | Dartford and Gravesham NHS Trust                                 | North West                                | 17567                             | 16621 | 15111 | 16282 | 12942 | 78523  | 22.4%  |
| RTG       | Derby Hospitals NHS Foundation Trust                             | North East                                | 22804                             | 22075 | 20463 | 22140 | 17286 | 104768 | 21.8%  |

|     |                                                        |                          |       |       |       |       |       |        |       |
|-----|--------------------------------------------------------|--------------------------|-------|-------|-------|-------|-------|--------|-------|
| RP5 | Doncaster and Bassetlaw Hospitals NHS Foundation Trust | East Midlands            | 21433 | 20734 | 18777 | 20817 | 16720 | 98480  | 21.8% |
| RBD | Dorset County Hospital NHS Foundation Trust            | South West               | 7730  | 7900  | 7822  | 9036  | 6981  | 39469  | 19.6% |
| RC3 | Ealing Hospital NHS Trust                              | East of England          | 13404 | 11827 | 9917  | 9982  | 7690  | 52820  | 25.4% |
| RWH | East and North Hertfordshire NHS Trust                 | East Midlands            | 24087 | 22624 | 20756 | 21912 | 17405 | 106784 | 22.6% |
| RJN | East Cheshire NHS Trust                                | West Midlands            | 7386  | 7518  | 7181  | 8057  | 5886  | 36029  | 20.5% |
| RVV | East Kent Hospitals University NHS Foundation Trust    | South West               | 28405 | 28069 | 27047 | 30898 | 23963 | 138382 | 20.5% |
| RXR | East Lancashire Hospitals NHS Trust                    | North West               | 26277 | 25355 | 23365 | 24195 | 19048 | 118240 | 22.2% |
| RXC | East Sussex Hospitals NHS Trust                        | North West               | 15344 | 14850 | 14236 | 16419 | 12978 | 73828  | 20.8% |
| RVR | Epsom and St Helier University Hospitals NHS Trust     | London                   | 18036 | 17199 | 15795 | 17055 | 13076 | 81162  | 22.2% |
| RDU | Frimley Park Hospital NHS Trust                        | East of England          | 19009 | 18998 | 17419 | 18685 | 14485 | 88597  | 21.5% |
| RR7 | Gateshead Health NHS Foundation Trust                  | East of England          | 8547  | 7992  | 7290  | 7895  | 6517  | 38241  | 22.4% |
| RLT | George Eliot Hospital NHS Trust                        | West Midlands            | 4483  | 4249  | 3997  | 4351  | 3490  | 20570  | 21.8% |
| RTE | Gloucestershire Hospitals NHS Foundation Trust         | London                   | 25140 | 24496 | 23744 | 26056 | 21022 | 120459 | 20.9% |
| RP4 | Great Ormond Street Hospital NHS Trust                 | East Midlands            | 1819  | 1658  | 1425  | 1443  | 1111  | 7456   | 24.4% |
| RN3 | Great Western Hospitals NHS Foundation Trust           | North West               | 16945 | 16583 | 15601 | 16993 | 13226 | 79347  | 21.4% |
| RJ1 | Guy's and St Thomas' NHS Foundation Trust              | Yorkshire and The Humber | 18653 | 15903 | 13342 | 13289 | 10384 | 71571  | 26.1% |
| RCD | Harrogate and District NHS Foundation Trust            | Yorkshire and The Humber | 7954  | 8302  | 8076  | 8630  | 7183  | 40145  | 19.8% |
| RD7 | Heatherwood and Wexham Park Hosps NHS Foundation Trust | South West               | 23647 | 22231 | 19614 | 20153 | 15184 | 100829 | 23.5% |
| RLQ | Hereford Hospitals NHS Trust                           | West Midlands            | 7844  | 7663  | 7492  | 8498  | 6650  | 38147  | 20.6% |
| RQQ | Hinchingbrooke Healthcare NHS Trust                    | North West               | 1413  | 1397  | 1349  | 1492  | 1160  | 6811   | 20.7% |
| RQX | Homerton University Hospital NHS Foundation Trust      | London                   | 13796 | 11963 | 10167 | 9635  | 7017  | 52578  | 26.2% |
| RWA | Hull and East Yorkshire Hospitals NHS Trust            | North West               | 23323 | 22196 | 20393 | 22278 | 18495 | 106685 | 21.9% |
| RYJ | Imperial College Healthcare NHS Trust                  | South Central            | 19767 | 16580 | 14287 | 13669 | 10208 | 74510  | 26.5% |
| RGQ | Ipswich Hospital NHS Trust                             | East of England          | 14563 | 14705 | 13911 | 15774 | 12282 | 71234  | 20.4% |
| R1F | Isle of wight NHS Trust                                | South Central            | 5868  | 6025  | 5909  | 6954  | 5536  | 30292  | 19.4% |
| RGP | James Paget University Hospitals NHS Foundation Trust  | London                   | 9501  | 9074  | 8733  | 9664  | 8008  | 44979  | 21.1% |
| RNQ | Kettering General Hospital NHS Foundation Trust        | South East Coast         | 15249 | 14782 | 13456 | 14226 | 11094 | 68806  | 22.2% |
| RJZ | King's College Hospital NHS Foundation Trust           | Yorkshire and The Humber | 36878 | 32843 | 28353 | 28515 | 21510 | 148099 | 24.9% |
| RAX | Kingston Hospital NHS Trust                            | London                   | 17675 | 15747 | 13362 | 13077 | 9721  | 69583  | 25.4% |
| RXN | Lancashire Teaching Hospitals NHS Trust                | South East Coast         | 19428 | 18873 | 17358 | 18576 | 14600 | 88836  | 21.9% |
| RR8 | Leeds Teaching Hospitals NHS Trust                     | London                   | 36478 | 32264 | 28161 | 29234 | 24461 | 150597 | 24.2% |
| RBQ | Liverpool Heart and Chest NHS Foundation Trust         | North West               | 11    | 9     | 9     | 11    | 8     | 47     | 22.8% |
| REP | Liverpool Womens Hospital NHS Trust                    | South West               | 801   | 730   | 673   | 757   | 600   | 3561   | 22.5% |
| R1K | London North West Healthcare NHS Trust                 | London                   | 123   | 107   | 93    | 92    | 72    | 486    | 25.4% |
| RC9 | Luton and Dunstable Hospital NHS Foundation Trust      | London                   | 22229 | 21177 | 18857 | 18930 | 14694 | 95886  | 23.2% |
| RWF | Maidstone and Tunbridge Wells NHS Trust                | Yorkshire and The Humber | 20979 | 21734 | 20928 | 22499 | 17316 | 103455 | 20.3% |
| RPA | Medway NHS Trust                                       | London                   | 20258 | 19145 | 18099 | 19678 | 15517 | 92696  | 21.9% |
| RQ8 | Mid Essex Hospital Services NHS Trust                  | London                   | 21569 | 21406 | 20268 | 21536 | 16631 | 101410 | 21.3% |
| RJD | Mid Staffordshire NHS Foundation Trust                 | London                   | 9750  | 9928  | 9232  | 10356 | 8170  | 47435  | 20.6% |
| RXF | Mid Yorkshire Hospitals NHS Trust                      | Yorkshire and The Humber | 30208 | 28588 | 26432 | 28005 | 21806 | 135039 | 22.4% |

|     |                                                               |                                           |       |       |       |       |       |        |       |
|-----|---------------------------------------------------------------|-------------------------------------------|-------|-------|-------|-------|-------|--------|-------|
| RD8 | Milton Keynes Hospital NHS Foundation Trust                   | South West                                | 18353 | 17473 | 15472 | 15976 | 12108 | 79382  | 23.1% |
| RP6 | Moorfields Eye Hospital NHS Foundation Trust                  | South West                                | 240   | 200   | 172   | 169   | 135   | 916    | 26.2% |
| RTD | Newcastle Upon Tyne Hospitals NHS Foundation Trust            | West Midlands                             | 26463 | 25348 | 23593 | 25451 | 20803 | 121658 | 21.8% |
| RM1 | Norfolk and Norwich University Hospitals NHS Foundation Trust | West Midlands                             | 24191 | 23315 | 21946 | 24782 | 19927 | 114161 | 21.2% |
| RVJ | North Bristol NHS Trust                                       | North East                                | 10772 | 10160 | 9320  | 10168 | 8073  | 48493  | 22.2% |
| RNL | North Cumbria University Hospitals NHS Trust                  | South Central                             | 13759 | 13640 | 13119 | 14489 | 11626 | 66633  | 20.6% |
| RJL | North Lincolnshire and Goole Hosps NHS Foundation Trust       | West Midlands                             | 19088 | 18665 | 16976 | 18374 | 14798 | 87901  | 21.7% |
| RAP | North Middlesex University Hospital NHS Trust                 | London                                    | 17728 | 16530 | 14485 | 14713 | 11114 | 74570  | 23.8% |
| RVW | North Tees and Hartlepool NHS Foundation Trust                | London<br>South East                      | 13438 | 13002 | 11697 | 12891 | 10540 | 61569  | 21.8% |
| RV8 | North West London Hospitals NHS Trust                         | Coast                                     | 28440 | 25812 | 23032 | 24078 | 18904 | 120266 | 23.6% |
| RNS | Northampton General Hospital NHS Trust                        | West Midlands                             | 18338 | 17443 | 15690 | 16008 | 12517 | 79996  | 22.9% |
| RBZ | Northern Devon Healthcare NHS Trust                           | North West                                | 7353  | 7094  | 6883  | 7687  | 6131  | 35147  | 20.9% |
| RTF | Northumbria Healthcare NHS Foundation Trust                   | London                                    | 14215 | 14128 | 13235 | 14280 | 11293 | 67151  | 21.2% |
| RX1 | Nottingham University Hospitals NHS Trust                     | West Midlands                             | 38032 | 36177 | 32352 | 34749 | 28267 | 169578 | 22.4% |
| RTH | Oxford Radcliffe Hospital NHS Trust                           | South West<br>Yorkshire and<br>The Humber | 34060 | 32439 | 29623 | 31839 | 24828 | 152788 | 22.3% |
| RGM | Papworth Hospital NHS Foundation Trust                        |                                           | 16    | 13    | 12    | 12    | 8     | 60     | 26.0% |
| RW6 | Pennine Acute Hospitals NHS Trust                             | North East                                | 40044 | 38040 | 33963 | 35296 | 26974 | 174316 | 23.0% |
| RGN | Peterborough and Stamford Hospitals NHS Foundation Trust      | East Midlands                             | 17474 | 16140 | 15033 | 16632 | 13216 | 78495  | 22.3% |
| RK9 | Plymouth Hospitals NHS Trust                                  | North West                                | 20142 | 19268 | 17833 | 20227 | 16284 | 93753  | 21.5% |
| RD3 | Poole Hospital NHS Foundation Trust                           | East of England                           | 21138 | 20146 | 18714 | 20732 | 16350 | 97080  | 21.8% |
| RHU | Portsmouth Hospitals NHS Trust                                | South West                                | 26999 | 26037 | 24156 | 26522 | 21110 | 124823 | 21.6% |
| RQW | Princess Alexandra Hospital NHS Trust                         | East of England                           | 14023 | 13172 | 12245 | 13114 | 10113 | 62667  | 22.4% |
| RCX | Queen Elizabeth Hospital Kings Lynn NHS Foundation Trust      | Yorkshire and<br>The Humber               | 9956  | 9404  | 8915  | 9806  | 7954  | 46035  | 21.6% |
| RPC | Queen Victoria Hospital NHS Foundation Trust                  | Yorkshire and<br>The Humber               | 6726  | 6806  | 6428  | 6905  | 5354  | 32219  | 20.9% |
| RL1 | Robert Jones and Agnes Hunt Orthopaedic NHS Trust             | South West                                | 13    | 15    | 14    | 17    | 10    | 68     | 19.2% |
| RHW | Royal Berkshire Hospital NHS Foundation Trust                 | South Central                             | 23542 | 22147 | 19591 | 20554 | 15735 | 101569 | 23.2% |
| RMC | Royal Bolton Hospital NHS Foundation Trust                    | East of England                           | 19020 | 17844 | 16126 | 17514 | 13573 | 84077  | 22.6% |
| RDZ | Royal Bournemouth and Christchurch Trust                      | East of England                           | 1184  | 1124  | 1104  | 1208  | 1042  | 5662   | 20.9% |
| RT3 | Royal Brompton and Harefield NHS Foundation Trust             | West Midlands                             | 947   | 861   | 732   | 730   | 554   | 3825   | 24.8% |
| REF | Royal Cornwall Hospitals NHS Trust                            | South West                                | 19261 | 18490 | 17834 | 20317 | 15741 | 91643  | 21.0% |
| RH8 | Royal Devon and Exeter NHS Foundation Trust                   | East of England                           | 15899 | 15614 | 14645 | 16187 | 13175 | 75519  | 21.1% |
| RAL | Royal Free Hampstead NHS Trust                                | London                                    | 12566 | 10985 | 9392  | 8837  | 6444  | 48224  | 26.1% |
| RQ6 | Royal Liverpool Broadgreen Hospitals NHS Trust                | South East<br>Coast                       | 2739  | 2435  | 2229  | 2558  | 2415  | 12377  | 22.1% |
| RRJ | Royal Orthopaedic Hospital NHS Foundation Trust               | North East<br>South East                  | 66    | 63    | 58    | 60    | 46    | 293    | 22.5% |
| RA2 | Royal Surrey County NHS Foundation Trust                      | Coast<br>Yorkshire and<br>The Humber      | 14365 | 14654 | 13725 | 14410 | 11549 | 68703  | 20.9% |
| RD1 | Royal United Hospital Bath NHS Trust                          |                                           | 19311 | 19120 | 18258 | 20436 | 16080 | 93205  | 20.7% |
| RL4 | Royal Wolverhampton Hospital NHS Trust                        | West Midlands                             | 17885 | 16607 | 14912 | 16480 | 13260 | 79145  | 22.6% |
| RM3 | Salford Royal NHS Foundation Trust                            | West Midlands                             | 8415  | 7550  | 6324  | 6878  | 5512  | 34678  | 24.3% |
| RNZ | Salisbury NHS Foundation Trust                                | North West                                | 10069 | 9941  | 9456  | 10268 | 7884  | 47618  | 21.1% |

|     |                                                               |                          |       |       |       |       |       |        |       |
|-----|---------------------------------------------------------------|--------------------------|-------|-------|-------|-------|-------|--------|-------|
| RXX | Sandwell and West Birmingham Hospitals NHS Trust              | South East Coast         | 22881 | 21606 | 19303 | 19471 | 15136 | 98396  | 23.3% |
| RCU | Sheffield Children's NHS Foundation Trust                     | Yorkshire and The Humber | 26393 | 25357 | 22926 | 23981 | 18891 | 117548 | 22.5% |
| RHQ | Sheffield Teaching Hospitals NHS Foundation Trust             | East of England          | 4173  | 4072  | 3698  | 3959  | 3504  | 19406  | 21.5% |
| RK5 | Sherwood Forest Hospitals NHS Foundation Trust                | North West               | 15327 | 14463 | 13411 | 14988 | 11922 | 70109  | 21.9% |
| RXW | Shrewsbury and Telford Hospital NHS Trust                     | North East               | 20758 | 20636 | 19583 | 22029 | 17634 | 100640 | 20.6% |
| RA9 | South Devon Health Care NHS Trust                             | South West               | 10266 | 10292 | 9849  | 11414 | 9087  | 50908  | 20.2% |
| RYQ | South London Healthcare NHS Trust                             | North West               | 9733  | 8978  | 7495  | 7661  | 5963  | 39830  | 24.4% |
| RTR | South Tees Hospitals NHS Foundation Trust                     | South Central            | 21107 | 20352 | 18832 | 20614 | 17076 | 97981  | 21.5% |
| RE9 | South Tyneside NHS Foundation Trust                           | South East Coast         | 5167  | 4960  | 4605  | 5200  | 4367  | 24299  | 21.3% |
| RJC | South Warwickshire NHS Foundation Trust                       | London                   | 9876  | 9961  | 9580  | 10252 | 7799  | 47468  | 20.8% |
| RHM | Southampton University Hospitals NHS Trust                    | East of England          | 26822 | 24691 | 22306 | 24038 | 19353 | 117210 | 22.9% |
| RAJ | Southend University Hospitals NHS Foundation Trust            | East of England          | 14453 | 14083 | 13221 | 14890 | 11647 | 68295  | 21.2% |
| RVY | Southport and Ormskirk Hospital NHS Trust                     | London                   | 10260 | 10611 | 10266 | 11640 | 9066  | 51841  | 19.8% |
| RJ7 | St George's Healthcare NHS Trust                              | London                   | 31284 | 25426 | 20910 | 20320 | 15187 | 113127 | 27.7% |
| RBN | St Helens and Knowsley Hospitals NHS Trust                    | North West               | 14440 | 13666 | 12525 | 14139 | 11216 | 65986  | 21.9% |
| RWJ | Stockport NHS Foundation Trust                                | South East Coast         | 14134 | 14058 | 12724 | 14042 | 10899 | 65856  | 21.5% |
| RTP | Surrey and Sussex Healthcare NHS Trust                        | East Midlands            | 20733 | 19727 | 18279 | 19669 | 14772 | 93180  | 22.3% |
| RMP | Tameside Hospital NHS Foundation Trust                        | North West               | 11004 | 10191 | 9117  | 9808  | 7758  | 47877  | 23.0% |
| RBA | Taunton and Somerset NHS Foundation Trust                     | South West               | 13532 | 13249 | 12818 | 14902 | 12026 | 66528  | 20.3% |
| RNA | The Dudley Group Of Hospitals NHS Foundation Trust            | South West               | 17348 | 17061 | 15890 | 16886 | 13631 | 80817  | 21.5% |
| RAS | The Hillingdon Hospital NHS Trust                             | London                   | 14886 | 13457 | 11438 | 12017 | 9399  | 61198  | 24.3% |
| RJ2 | The Lewisham Healthcare NHS Trust                             | South Central            | 26515 | 23543 | 19021 | 19211 | 14991 | 103280 | 25.7% |
| RBT | The Mid Cheshire Hospitals NHS Trust                          | North West               | 12002 | 12187 | 11324 | 12439 | 10011 | 57962  | 20.7% |
| RFR | The Rotherham NHS Foundation Trust                            | North West               | 10858 | 10519 | 9827  | 10678 | 8464  | 50347  | 21.6% |
| RPY | The Royal Marsden NHS Foundation Trust                        | London                   | 82    | 81    | 70    | 67    | 49    | 348    | 23.4% |
| RAN | The Royal National Orthopaedic Hospital NHS Trust             | London                   | 72    | 61    | 56    | 58    | 43    | 289    | 24.7% |
| RET | The Walton Centre NHS Foundation Trust                        | North West               | 51    | 53    | 51    | 58    | 43    | 255    | 19.9% |
| RWD | United Lincolnshire Hospitals NHS Trust                       | North West               | 24615 | 23171 | 22206 | 25501 | 20431 | 115924 | 21.2% |
| RRV | University College London Hospitals NHS Foundation Trust      | North West               | 10842 | 9383  | 8334  | 7939  | 6283  | 42780  | 25.3% |
| RRK | University Hospital Birmingham NHS Foundation Trust           | Yorkshire and The Humber | 2588  | 2481  | 2271  | 2526  | 2242  | 12108  | 21.4% |
| RJE | University Hospital Of North Staffordshire Hospital NHS Trust | London                   | 24197 | 23673 | 21218 | 23229 | 18389 | 110705 | 21.9% |
| RM2 | University Hospital Of South Manchester NHS Foundation Trust  | West Midlands            | 16366 | 15706 | 13856 | 14309 | 10658 | 70896  | 23.1% |
| RKB | University Hospitals Coventry and Warwickshire NHS Trust      | London                   | 29209 | 26892 | 24075 | 25340 | 21005 | 126521 | 23.1% |
| RA7 | University Hospitals Of Bristol NHS Foundation Trust          | South West               | 34426 | 31174 | 27560 | 29230 | 22798 | 145188 | 23.7% |
| RWE | University Hospitals Of Leicester NHS Trust                   | North West               | 41652 | 40105 | 36915 | 39238 | 31954 | 189865 | 21.9% |
| RTX | University Hospitals Of Morecambe Bay NHS Foundation Trust    | South East Coast         | 13424 | 13509 | 13122 | 15302 | 12638 | 67995  | 19.7% |
| RBK | Walsall Hospitals NHS Trust                                   | South West               | 12567 | 12034 | 11231 | 11654 | 8966  | 56452  | 22.3% |
| RWW | Warrington and Halton Hospitals NHS Foundation Trust          | East of England          | 13354 | 13099 | 12099 | 13081 | 10137 | 61770  | 21.6% |
| RWG | West Hertfordshire Hospitals NHS Trust                        | East Midlands            | 22776 | 20977 | 19053 | 19683 | 14997 | 97486  | 23.4% |

|     |                                                             |                             |       |       |       |       |       |        |       |
|-----|-------------------------------------------------------------|-----------------------------|-------|-------|-------|-------|-------|--------|-------|
| RFW | West Middlesex University NHS Trust                         | Yorkshire and<br>The Humber | 18219 | 15328 | 12170 | 12232 | 9481  | 67430  | 27.0% |
| RGR | West Suffolk Hospital NHS Trust                             | East of England             | 12376 | 12108 | 11246 | 12210 | 9241  | 57180  | 21.6% |
| RYR | Western Sussex Hospitals NHS Trust                          | West Midlands               | 19777 | 19254 | 18054 | 19539 | 15145 | 91769  | 21.6% |
| RA3 | Weston Area Health NHS Trust                                | South West                  | 2682  | 2527  | 2462  | 2734  | 2132  | 12538  | 21.4% |
| RKE | Whittington Hospital NHS Trust                              | East Midlands               | 13329 | 11370 | 10013 | 9702  | 6897  | 51311  | 26.0% |
| RBL | Wirral University Teaching Hospital NHS<br>Foundation Trust | West Midlands               | 15335 | 15076 | 14312 | 15661 | 12359 | 72743  | 21.1% |
| RWP | Worcestershire Acute Hospitals NHS Trust                    | East of England             | 24382 | 24310 | 22996 | 25499 | 20116 | 117303 | 20.8% |
| RRF | Wrightington, Wigan and Leigh NHS<br>Foundation Trust       | West Midlands               | 11380 | 11210 | 10239 | 10748 | 8714  | 52291  | 21.8% |
| RA4 | Yeovil District Hospital NHS Foundation<br>Trust            | South West                  | 7418  | 7357  | 7148  | 8704  | 6971  | 37598  | 19.7% |
| RCB | York Hospitals NHS Trust                                    | East of England             | 21400 | 21300 | 19843 | 22308 | 18387 | 103238 | 20.7% |
